# Supplementary material
Source: PubMed Central journal article supplement (PMC4195515)

*Supporting Information for:*

**Mechanistic Investigations of Cu-Catalyzed Fluorination of Diaryliodonium Salts:  
Elaborating the Cu<sup>I</sup>/Cu<sup>III</sup> Manifold in Copper Catalysis**

Naoko Ichiishi,<sup>†</sup> Allan J. Canty,<sup>\*‡</sup> Brian F. Yates,<sup>‡</sup> and Melanie S. Sanford<sup>\*†</sup>

<sup>†</sup>*Department of Chemistry, University of Michigan,  
930 N. University Ave., Ann Arbor, Michigan 48109, United States*

<sup>‡</sup>*School of Chemistry, University of Tasmania,  
Private Bag 75, Hobart, Tasmania 7001, Australia.*

## Table of Contents

|      |                                                                                                                                                                     |         |
|------|---------------------------------------------------------------------------------------------------------------------------------------------------------------------|---------|
| I.   | General Procedures and Materials and Methods                                                                                                                        | p. S2   |
| II.  | Synthesis and Characterization of Diaryliodonium Substrates                                                                                                         | p. S3   |
| III. | Experimental Details                                                                                                                                                |         |
|      | A. Procedure for Experiments in Table 1                                                                                                                             | p. S5   |
|      | B. Procedure for Experiments in Figure 1                                                                                                                            | p. S5   |
|      | C. Procedure for Experiments in Table 2                                                                                                                             | p. S6   |
|      | D. Procedure for Experiments in Table 4                                                                                                                             | p. S6   |
|      | E. Procedure for Experiments in Scheme 2                                                                                                                            | p. S7   |
|      | F. Procedure for experiments in Table 5-6                                                                                                                           | p. S7   |
| IV.  | DFT Calculations:                                                                                                                                                   |         |
|      | A. Computational Details                                                                                                                                            | p. S8   |
|      | B. Energies of Calculated Species, Gaussview Diagrams and Cartesian Coordinatesp.                                                                                   |         |
|      | a. Copper species for reaction of [Mes(Ph)I] <sup>+</sup> with [CuF(OTf)] <sup>-</sup> (Figure 2)                                                                   | p. S10  |
|      | b. Copper species for reaction of [Mes(Ph)I] <sup>+</sup> with mesityl transfer (Figure 3 and Figure S1)                                                            | p. S32  |
|      | c. Copper species for reaction of [Mes(Ph)I] <sup>+</sup> with CuF(DMF) (Figure 4)                                                                                  | p. S41  |
|      | d. Copper species for reaction of [Mes(Ph)I] <sup>+</sup> with [CuF <sub>2</sub> ] <sup>-</sup> (Figure 5)                                                          | p. S50  |
|      | e. Copper species for reaction of [Mes(Ar)I] <sup>+</sup> with [CuF <sub>2</sub> ] <sup>-</sup> : Adducts and Transition Structures Not Documented Above, (Table 3) | p. S69  |
|      | f. Other Copper Species                                                                                                                                             | p. S133 |
|      | g. Isomerisation and Reductive Elimination Reactions of Mes(Ar)IF (Figure 7 and Table 4)                                                                            | p. S133 |
|      | h. Other Non-Copper Containing Species                                                                                                                              | p. S173 |
| V.   | <sup>1</sup> H, <sup>13</sup> C, and <sup>19</sup> F NMR Spectra                                                                                                    | p. S187 |

## I. General Procedures and Materials and Methods

**General Procedures.** NMR spectra were obtained on a Varian MR400 (400.52 MHz for  $^1\text{H}$ ; 100.71 MHz for  $^{13}\text{C}$ ; 376.87 MHz for  $^{19}\text{F}$ ), a Varian vnmrs 500 (500.10 MHz for  $^1\text{H}$ ), or a Varian vnmrs 700 (699.76 MHz for  $^1\text{H}$ ; 175.95 MHz for  $^{13}\text{C}$ ) spectrometer.  $^1\text{H}$  and  $^{13}\text{C}$  NMR chemical shifts are reported in parts per million (ppm) relative to TMS, with the residual solvent peak used as an internal reference.  $^{19}\text{F}$  NMR spectra are referenced based on the internal standard 1-fluoro-3-nitrobenzene ( $-109.03$  ppm). UV-Vis spectra for Cu trapping experiments were obtained on Shimadzu UV-1601 UV-VIS Spectrometer. Slow addition experiments with  $\text{NBu}_4\text{F}\cdot\text{H}_2\text{O}$  were performed using a Fisher Scientific syringe pump (90-120V/60 Hz).

**Materials and Methods.** Diaryliodonium substrates **S1a-S5a** were prepared according to literature procedures and stored in a drybox under  $\text{N}_2$  until use.<sup>1</sup>  $\text{MesI}(\text{OAc})_2$  was obtained from TCI America. *m*-CPBA was obtained from Sigma Aldrich. Aryl boronic acids were obtained from Frontier Scientific and Oakwood Products. Anhydrous KF, anhydrous DMF  $\text{BF}_3\cdot\text{OEt}_2$  and  $\text{NBu}_4\text{F}\cdot\text{H}_2\text{O}$  were obtained from Alfa Aesar and used as received.  $\text{Cu}(\text{OTf})_2$  was obtained from Strem.  $(\text{CH}_3\text{CN})_4\text{CuOTf}$  was purchased from Sigma Aldrich. 2,2'-biquinoline, 4-iodonitrobenzene and 18-crown-6 were obtained from Acros. TfOH and 1-fluoro-3-nitrobenzene were obtained from Oakwood Products. All reactions were conducted in a nitrogen atmosphere glovebox or using standard Schlenk techniques unless otherwise stated.

---

<sup>1</sup>Ichiishi, N.; Canty, A. J.; Yates, B. F.; Sanford, M. S. *Org. Lett.* **2013**, *15*, 5134–5137.

## II. Synthesis of Diaryliodonium Substrates

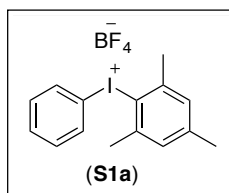

(Mesityl)(phenyl)iodonium tetrafluoroborate **S1a**. [Ph-I-Mes]BF<sub>4</sub> was prepared using a literature procedure<sup>2</sup> and was obtained as an off-white solid (2.79 g, 68% yield). The <sup>1</sup>H, <sup>13</sup>C, and <sup>19</sup>F NMR spectroscopic data for this compound were identical to that reported previously in the literature.<sup>3</sup> HRMS [M-BF<sub>4</sub>]<sup>+</sup> Calcd for C<sub>15</sub>H<sub>16</sub>I<sup>+</sup>: 323.0291; Found: 323.0301.

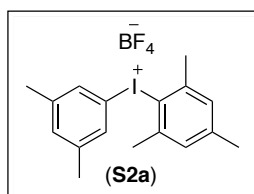

(Mesityl)(3,5-dimethylphenyl)iodonium tetrafluoroborate **S2a**. [3,5-MePh-I-Mes]BF<sub>4</sub> was prepared using a literature procedure<sup>2</sup> and was obtained as a white solid (479 mg, 73% yield). The <sup>1</sup>H, <sup>13</sup>C, and <sup>19</sup>F NMR spectroscopic data were identical to that reported previously in the literature.<sup>1</sup> HRMS [M-BF<sub>4</sub>]<sup>+</sup> Calcd for C<sub>17</sub>H<sub>20</sub>I<sup>+</sup>: 351.0604; Found: 351.0603.

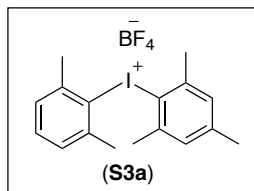

(Mesityl)(2,6-dimethylphenyl)iodonium tetrafluoroborate **S3a**. [2,6-MePh-I-Mes]BF<sub>4</sub> was prepared using a literature procedure<sup>2</sup> and was obtained as a white solid (331 mg, 72% yield). The <sup>1</sup>H, <sup>13</sup>C, and <sup>19</sup>F NMR spectroscopic data were identical to that reported previously in the literature.<sup>1</sup> HRMS [M-BF<sub>4</sub>]<sup>+</sup> Calcd for C<sub>17</sub>H<sub>20</sub>I<sup>+</sup>: 351.0604; Found: 351.0613.

<sup>2</sup> Chen, D.-W.; Ochiai, M. *J. Org. Chem.* **1999**, *64*, 6804.

<sup>3</sup> Kieffer, M. E.; Chuang, K. V.; Reisman, S. E. *Chem. Sci.* **2012**, *3*, 3170.

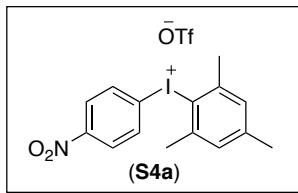

(*Mesityl*)(4-nitrophenyl)iodonium triflate **S4a**.<sup>4</sup> To an oven-dried round-bottom flask equipped with a stir bar was added *m*-CPBA (950 mg, 5.5 mmol, 1.10 equiv), CH<sub>2</sub>Cl<sub>2</sub> (0.20 M), 4-iodonitrobenzene (1.25 g, 5.0 mmol, 1.00 equiv), and mesitylene (0.77 mL, 5.5 mmol, 1.10 equiv). The mixture was cooled to 0 °C and TfOH (0.90 mL, 10 mmol, 2.0 equiv) was added dropwise while stirring. The reaction was then warmed to room temperature and stirred for 2 h. The solvent was removed under vacuum, and Et<sub>2</sub>O was added to provide a heterogeneous mixture, which was cooled to –20 °C for 30 min. The product was collected on a fritted glass funnel, washed with Et<sub>2</sub>O to afford **S4a** as a beige solid (1.55 g, 60% yield). The <sup>1</sup>H, <sup>13</sup>C, and <sup>19</sup>F NMR spectroscopic data were identical to that reported previously in the literature.<sup>5</sup> HRMS [M-OTf]<sup>+</sup> Calcd for C<sub>15</sub>H<sub>15</sub>INO<sub>2</sub><sup>+</sup>: 368.0142; Found 368.0143.

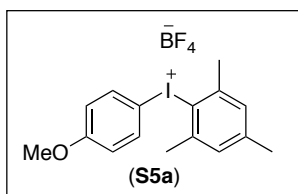

(*Mesityl*)(4-methoxyphenyl)iodonium tetrafluoroborate **S5a**. [4-OMePh–I–Mes]BF<sub>4</sub> was prepared using a literature procedure<sup>2</sup> and was obtained as an off-white solid (1.01 g, 76% yield). The <sup>1</sup>H, <sup>13</sup>C, and <sup>19</sup>F NMR spectroscopic data for this compound were identical to that reported previously in the literature.<sup>2</sup> HRMS [M-BF<sub>4</sub>]<sup>+</sup> Calcd for C<sub>16</sub>H<sub>18</sub>IO<sup>+</sup>: 353.0397; Found: 353.0404

<sup>4</sup> Bielawski, M.; Zhu, M.; Olofsson, B. *Adv. Synth. Catal.* **2007**, *349*, 2610.

<sup>5</sup> Bigot, A.; Williamson, A. E.; Gaunt, M. J. *J. Am. Chem. Soc.* **2011**, *133*, 13778.

### III. Experimental Details

#### A. Procedure for Experiments in Table 1

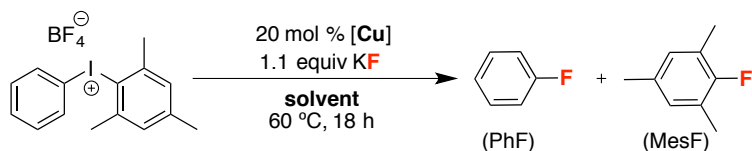

In a glovebox, [Ph-I-Mes]BF<sub>4</sub> (20.5 mg, 0.05 mmol, 1 equiv), [Cu] (0.01 mmol, 0.2 equiv), KF (3.2 mg, 0.055 mmol, 1.1 equiv) and 18-crown-6 (5.3 mg, 0.02 mmol, 0.4 equiv) were combined in DMF (0.5 mL) in a 4 mL vial. The vial was sealed with a Teflon-lined cap, and the reaction mixture was stirred at 60 °C for 18 h. After cooling to room temperature, the reaction was quenched with sat. aqueous NaHCO<sub>3</sub> (0.5 mL), and 1-fluoro-3-nitrobenzene (5.3 μL, 0.05 mmol, 1 equiv) was added as an internal standard. After cooling, the reaction mixture was diluted with CH<sub>2</sub>Cl<sub>2</sub> (2 mL), and was analyzed by <sup>19</sup>F NMR spectroscopy and GC-MS. The <sup>19</sup>F NMR data for PhF and MesF matched that of corresponding authentic samples and GC-MS analysis was used for further confirming the identity of products. All characterization data matched to the previous literature.<sup>1</sup>

#### B. Procedure for Experiments in Figure 1

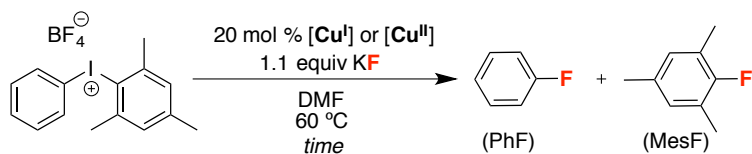

In a glovebox, [Ph-I-Mes]BF<sub>4</sub> (41.0 mg, 0.1 mmol, 1 equiv), Cu(OTf)<sub>2</sub> or (CH<sub>3</sub>CN)<sub>4</sub>CuOTf (7.2 mg or 7.5 mg, 0.02 mmol, 0.2 equiv), KF (6.4 mg, 0.11 mmol, 1.1 equiv) and 18-crown-6 (5.3 mg, 0.02 mmol, 0.4 equiv) were combined in DMF (1.0 mL) in a 4 mL vial. The vial was sealed with a Teflon-lined cap, and the reaction mixture was stirred at 60 °C for corresponding time in Figure 1. A reaction was quenched immediately at each time point by immersing the vial into liquid N<sub>2</sub> followed by adding sat. aqueous NaHCO<sub>3</sub> (0.1 mL), and 1-fluoro-3-nitrobenzene (5.3 μL, 0.05 mmol, 0.5 equiv) was added as an internal standard. The reaction was analyzed by <sup>19</sup>F NMR spectroscopy and GC-MS. The <sup>19</sup>F NMR data for PhF and MesF matched that of corresponding authentic samples and GC-MS analysis was used for further confirming the identity of products. All characterization data matched to the previous literature.<sup>1</sup>

### C. Procedure for Experiments in Table 2

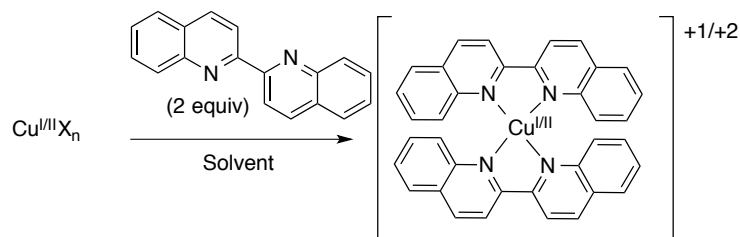

To a 4 mL vial charged with a stir bar was added  $\text{Cu}(\text{OTf})_2$  or  $(\text{CH}_3\text{CN})_4\text{CuOTf}$  (0.05 mmol, 1 equiv). The appropriate solvent (1.5 mL) was added via a syringe, and the reaction mixture was stirred until the Cu dissolved completely. To the mixture, 2,2'-biquinoline (25.6 mg, 0.10 mmol, 2 equiv) was added. The resulting mixture was stirred at rt for 1 h and then the color was recorded. The reaction was then diluted with 3.0 mL of the corresponding solvent to analyze via UV-Vis spectrometry.

### D. Procedure for Experiments in Table 4

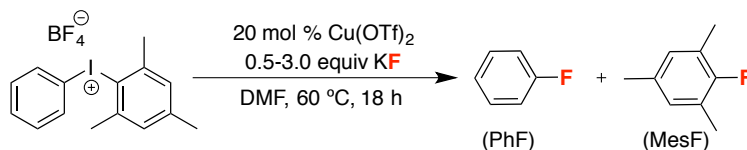

In a glovebox,  $[\text{Ph-I-Mes}]\text{BF}_4$  (41.0 mg, 0.1 mmol, 1 equiv),  $\text{Cu}(\text{OTf})_2$  (7.2 mg, 0.02 mmol, 0.2 equiv),  $\text{KF}$  (0.5 -3.0 equiv), and 18-crown-6 (5.3 mg, 0.02 mmol, 0.4 equiv) were combined DMF (1.0 mL) in a 4 mL vial. The vial was sealed with a Teflon-lined cap, and the reaction mixture was stirred at 60 °C for 18h. After cooling to room temperature, the reaction was quenched with sat. aqueous  $\text{NaHCO}_3$  (0.5 mL), and 1-fluoro-3-nitrobenzene (10.6  $\mu\text{l}$ , 0.05 mmol, 1.0 equiv) was added as an internal standard. The reaction was analyzed by  $^{19}\text{F}$  NMR spectroscopy and GC-MS. The  $^{19}\text{F}$  NMR data for PhF and MesF matched that of corresponding authentic samples and GC-MS analysis was used for further confirming the identity of products. All characterization data matched to the previous literature.<sup>1</sup>

## E. Procedure for Experiments in Scheme 2

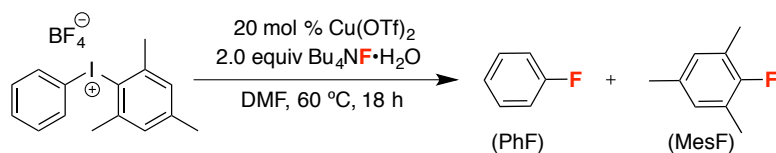

*Single addition of NBu<sub>4</sub>F·H<sub>2</sub>O.* In a glovebox, [Ph-I-Mes]BF<sub>4</sub> (41.0 mg, 0.1 mmol, 1 equiv), Cu(OTf)<sub>2</sub> (7.2 mg, 0.02 mmol, 0.2 equiv), and NBu<sub>4</sub>F·H<sub>2</sub>O (2.0 equiv) were combined in DMF (1.0 mL) in a 4 mL vial. The vial was sealed with a Teflon-lined cap, and the reaction mixture was stirred at 60 °C for 18h. After cooling to room temperature, the reaction was quenched with sat. aqueous NaHCO<sub>3</sub> (0.5 mL), and 1-fluoro-3-nitrobenzene (10.6 μL, 0.05 mmol, 1.0 equiv) was added as an internal standard. The reaction was analyzed by <sup>19</sup>F NMR spectroscopy and GC-MS.

*Slow addition of NBu<sub>4</sub>F·H<sub>2</sub>O.* In a glovebox, [Mes-I-Ph]BF<sub>4</sub> (20.5 mg, 0.05 mmol, 1.0 equiv) and Cu(OTf)<sub>2</sub> (3.6 mg, 0.01 mmol, 0.2 equiv) were combined in DMF (150 μL) in a 4 mL vial equipped with a stir bar. The vial was sealed with a cap containing a PTFE/silicone septum, removed from the glovebox, and heated to 60 °C. Bu<sub>4</sub>NF·3H<sub>2</sub>O (0.1 mmol, 2.0 equiv) were added dropwise over 7 h as a stock solution (350 μL of a 0.2 M solution with respect to Bu<sub>4</sub>NF·3H<sub>2</sub>O, prepared under inert atmosphere in dry DMF) via syringe pump using a 1 mL plastic syringe with an air-tight needle. The reaction mixture was stirred for an additional 11 h at 60 °C. After cooling to room temperature, the reaction was quenched with saturated aqueous NaHCO<sub>3</sub> (0.5 mL), and 1-fluoro-3-nitrobenzene (5.3 μL, 0.05 mmol, 1 equiv) was added as an internal standard. The reaction mixture was diluted with CH<sub>2</sub>Cl<sub>2</sub> (2.0 mL), and the reaction was analyzed by <sup>19</sup>F NMR spectroscopy and GC-MS.

## F. Procedure for experiments in Table 5-6

*Cu-catalyzed reactions in Table 5.* Reactions were performed according to the literature procedure.<sup>1</sup> Selectivities of ArF and MesF were determined by crude <sup>19</sup>F NMR using 1-fluoro-3-nitrobenzene as an internal standard.

*Cu-free reactions in Table 6.* Reactions were conducted analogously to Cu-catalyzed reactions, but in the absence of Cu.



## IV. DFT Calculations

### A. Computational Details

Gaussian 09<sup>1</sup> was used for DFT calculations at the BP86 level.<sup>2,3</sup> All calculations were carried out for *N,N*-dimethylformamide as solvent with the IEFPCM (SCRF) model and utilized the quadruple- $\xi$  valence polarised def2-QZVP<sup>4-7</sup> basis set on Cu and I along with the corresponding ECP and the 6-311+G(2d,p) basis set on other atoms. All thermodynamic data were calculated at the standard state (298.15 K and 1 atm) and entropy calculations were adjusted by the method proposed by Okuno.<sup>8</sup> All transition structures contained one imaginary frequency (except for **TS\_1** showing a low additional value of  $-6i$  cm<sup>-1</sup>), exhibiting atom displacements consistent with the anticipated reaction pathway. The nature of transition structures was confirmed by intrinsic reaction coordinate (IRC) searches, vibrational frequency calculations, and potential energy surface scans.

1. Frisch, M. J.; Trucks, G. W.; Schlegel, H. B. Scuseria, G. E.; Robb, M. A.; Cheeseman, J. R.; Scalmani, G.; Barone, V.; Mennucci, B.; Petersson, G. A.; Nakatsuji, H.; Caricato, M.; Li, X.; Hratchian, H. P.; Izmaylov, A. F.; Bloino, J.; Zheng, G.; Sonnenberg, J. L.; Hada, M.; Ehara, M.; Toyota, K.; Fukuda, R.; Hasegawa, J.; Ishida, M.; Nakajima, T.; Honda, Y.; Kitao, O.; Nakai, H.; Vreven, T.; Montgomery, Jr. J. A.; Peralta, J. E.; Ogliaro, F.; Bearpark, M.; Heyd, J. J.; Brothers, E.; Kudin, K. N.; Staroverov, V. N.; Kobayashi, R.; Normand, J.; Raghavachari, K.; Rendell, A.; Burant, J. C.; Iyengar, S. S.; Tomasi, J.; Cossi, M.; Rega, N.; Millam, J. M.; Klene, M.; Knox, J. E.; Cross, J. B.; Bakken, V.; Adamo, C.; Jaramillo, J.; Gomperts, R.; Stratmann, R. E.; Yazyev, O.; Austin, A. J.; Cammi, R.; Pomelli, C.; Ochterski, J. W.; Martin, R. L.; Morokuma, K.; Zakrzewski, V. G.; Voth, G. A.; Salvador, P.; Dannenberg, J. J.; Dapprich, S.; Daniels, A. D.; Farkas, O.; Foresman, J. B.; Ortiz, J. V.; Cioslowski, J.; and Fox, D. J. Gaussian, Inc., Wallingford CT, 2009.
2. Lee, C., Yang, W.; Parr, R. G. *Phys. Rev. B* **1988**, *37*, 785. (c) Becke, A. D.; *J. Chem. Phys.* **1993**, *98*, 5648.
3. Becke, A. D.; *J. Chem. Phys.* **1993**, *98*, 5648.
4. Miertus, S.; Scrocco, E.; Tomasi, J. *J. Chem. Phys.* **1981**, *55*, 117.
5. Miertus, S., Tomasi, J. *J. Chem. Phys.* **1982**, *65*, 239.
6. Cramer, C. J.; Truhlar, D. G. *Chem. Rev.* **1999**, *99*, 2161.
7. Tomasi, J.; Mennucci, B.; Cammi, R. *Chem. Rev.* **2005**, *105*, 2999.
8. Weigend, F.; Furche, F.; Ahlrichs, R. *J. Chem. Phys.* **2003**, *119*, 12753.
9. Okuno, Y. *Chem., Eur. J.* **1997**, *3*, 212.

**Figure S1.** Computed pathway for oxidation of  $[\text{CuF}(\text{OTf})]^-$  by  $[\text{Ph}(\text{Mes})\text{I}]^+$  with transfer of a mesityl group to copper, together with direct reductive elimination from the  $\text{Cu}^{\text{III}}$  product **IIIa\_Mes**. Energies  $\Delta\text{G}$  ( $\Delta\text{H}$ ) are in kcal/mol.

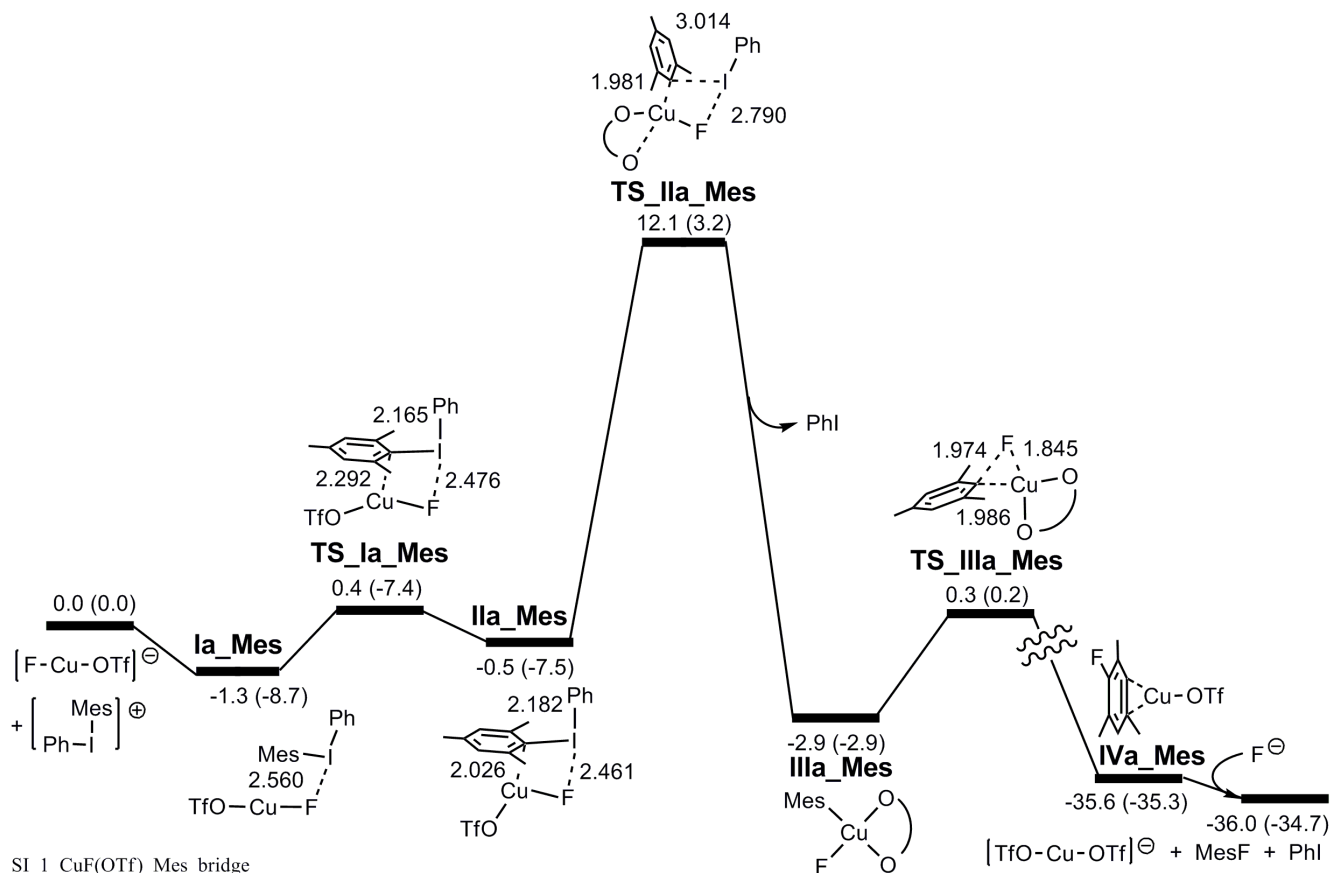

*B. Energies of calculated species, Gaussview diagrams, and Cartesian coordinates*

**a. Copper species for reaction of [Mes(Ph)I]<sup>+</sup> with [CuF(OTf)]<sup>-</sup> (Figure 2)**

**[CuF(OTf)]<sup>-</sup>**

|                                              |                             |
|----------------------------------------------|-----------------------------|
| Zero-point correction=                       | 0.027853 (Hartree/Particle) |
| Thermal correction to Energy=                | 0.039012                    |
| Thermal correction to Enthalpy=              | 0.039956                    |
| Thermal correction to Gibbs Free Energy=     | -0.012205                   |
| Sum of electronic and zero-point Energies=   | -1258.234887                |
| Sum of electronic and thermal Energies=      | -1258.223729                |
| Sum of electronic and thermal Enthalpies=    | -1258.222784                |
| Sum of electronic and thermal Free Energies= | -1258.274946                |

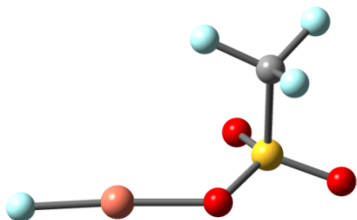

|    |           |           |           |
|----|-----------|-----------|-----------|
| Cu | -2.005613 | -0.005373 | -0.173231 |
| C  | 1.701857  | -0.781858 | -0.005940 |
| S  | 0.832099  | 0.896690  | 0.084963  |
| O  | 1.785170  | 1.830892  | -0.524163 |
| O  | 0.501188  | 1.065908  | 1.506140  |
| O  | -0.375528 | 0.678777  | -0.821596 |
| F  | 2.004237  | -1.094124 | -1.284664 |
| F  | 0.917219  | -1.759452 | 0.499083  |
| F  | 2.849665  | -0.744741 | 0.708123  |
| F  | -3.620963 | -0.635538 | 0.346001  |

**la**

|                                              |                             |
|----------------------------------------------|-----------------------------|
| Zero-point correction=                       | 0.283077 (Hartree/Particle) |
| Thermal correction to Energy=                | 0.313419                    |
| Thermal correction to Enthalpy=              | 0.314363                    |
| Thermal correction to Gibbs Free Energy=     | 0.213314                    |
| Sum of electronic and zero-point Energies=   | -1850.580372                |
| Sum of electronic and thermal Energies=      | -1850.550031                |
| Sum of electronic and thermal Enthalpies=    | -1850.549086                |
| Sum of electronic and thermal Free Energies= | -1850.650135                |
| E(RB-P86) =                                  | -1850.86344914 A.U          |

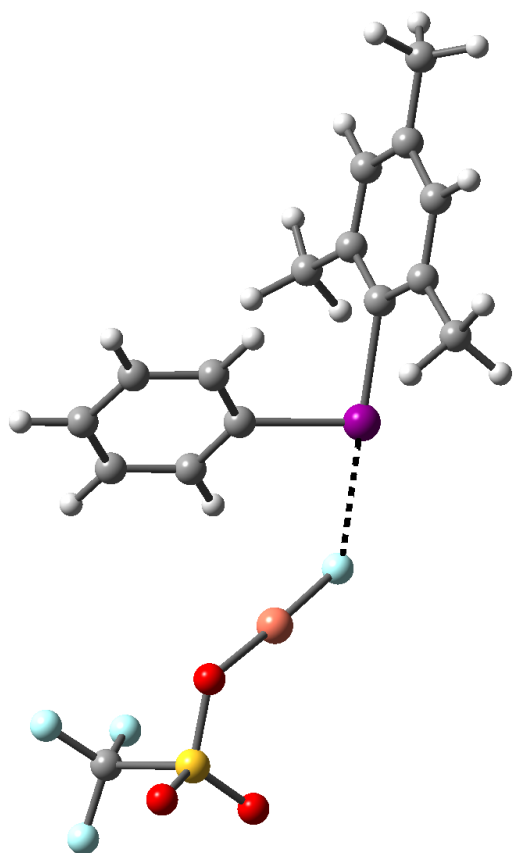

|    |           |           |           |
|----|-----------|-----------|-----------|
| C  | 3.775490  | -0.363879 | -0.127685 |
| C  | 4.477872  | 0.576801  | -0.909262 |
| C  | 4.351608  | -1.049157 | 0.962877  |
| C  | 5.805825  | 0.842195  | -0.541409 |
| C  | 5.685564  | -0.739863 | 1.271315  |
| C  | 6.424875  | 0.202499  | 0.541992  |
| H  | 6.371773  | 1.570380  | -1.129575 |
| H  | 6.157129  | -1.259053 | 2.110742  |
| I  | 1.759751  | -0.846718 | -0.663997 |
| C  | 0.898135  | 0.996788  | 0.024798  |
| C  | 1.396179  | 1.570755  | 1.191601  |
| C  | -0.135703 | 1.557106  | -0.725094 |
| C  | 0.824975  | 2.775711  | 1.623298  |
| H  | 2.209427  | 1.113241  | 1.756863  |
| C  | -0.691048 | 2.761860  | -0.271161 |
| H  | -0.496695 | 1.079488  | -1.636011 |
| C  | -0.214480 | 3.366958  | 0.896639  |
| H  | 1.197964  | 3.243014  | 2.537061  |
| H  | -1.497498 | 3.223563  | -0.844536 |
| H  | -0.653096 | 4.305684  | 1.241068  |
| Cu | -2.068514 | -0.951738 | -0.178211 |
| F  | -0.676600 | -1.393368 | -1.294458 |
| C  | -5.407778 | 0.765611  | -0.265561 |
| S  | -4.894417 | -0.757161 | 0.734960  |

|   |           |           |           |
|---|-----------|-----------|-----------|
| F | -5.237401 | 1.892801  | 0.457848  |
| F | -6.710792 | 0.669751  | -0.610155 |
| F | -4.672914 | 0.866703  | -1.395696 |
| O | -5.107855 | -1.888641 | -0.176793 |
| O | -5.701915 | -0.680962 | 1.956472  |
| O | -3.425336 | -0.461272 | 1.032122  |
| C | 7.846072  | 0.532877  | 0.926012  |
| H | 7.863729  | 1.304941  | 1.713767  |
| H | 8.370056  | -0.348868 | 1.322537  |
| H | 8.412864  | 0.923635  | 0.069094  |
| C | 3.623676  | -2.088162 | 1.783937  |
| H | 2.686078  | -1.698243 | 2.209566  |
| H | 3.364865  | -2.974203 | 1.182348  |
| H | 4.256176  | -2.424342 | 2.616248  |
| C | 3.872816  | 1.292840  | -2.090929 |
| H | 3.500305  | 0.584182  | -2.847557 |
| H | 3.023414  | 1.927236  | -1.790921 |
| H | 4.620039  | 1.938775  | -2.570504 |

### TS\_1a

|                                              |                             |
|----------------------------------------------|-----------------------------|
| Zero-point correction=                       | 0.281818 (Hartree/Particle) |
| Thermal correction to Energy=                | 0.311688                    |
| Thermal correction to Enthalpy=              | 0.312632                    |
| Thermal correction to Gibbs Free Energy=     | 0.212830                    |
| Sum of electronic and zero-point Energies=   | -1850.577685                |
| Sum of electronic and thermal Energies=      | -1850.547815                |
| Sum of electronic and thermal Enthalpies=    | -1850.546871                |
| Sum of electronic and thermal Free Energies= | -1850.646673                |
| E(RB-P86) =                                  | -1850.85950285 A.U.         |

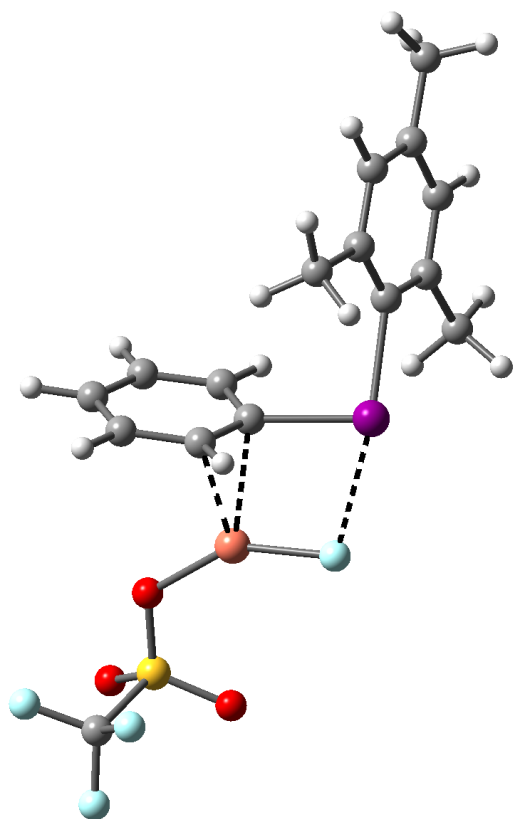

|    |           |           |           |
|----|-----------|-----------|-----------|
| C  | 3.582101  | -0.348878 | -0.097522 |
| C  | 4.202956  | 0.682996  | -0.830301 |
| C  | 4.186125  | -0.973208 | 1.016332  |
| C  | 5.470845  | 1.101821  | -0.394973 |
| C  | 5.455487  | -0.511004 | 1.393267  |
| C  | 6.112494  | 0.522028  | 0.707265  |
| H  | 5.968245  | 1.906950  | -0.943445 |
| H  | 5.943072  | -0.978067 | 2.254050  |
| I  | 1.667777  | -1.081498 | -0.735236 |
| C  | 0.547685  | 0.656710  | -0.114277 |
| C  | 0.718791  | 1.131509  | 1.194986  |
| C  | -0.145036 | 1.401736  | -1.099950 |
| C  | 0.163994  | 2.373581  | 1.528741  |
| H  | 1.265034  | 0.553157  | 1.940652  |
| C  | -0.687986 | 2.646837  | -0.729270 |
| H  | -0.173560 | 1.072301  | -2.140292 |
| C  | -0.529607 | 3.128312  | 0.573961  |
| H  | 0.280932  | 2.748158  | 2.547575  |
| H  | -1.216711 | 3.235928  | -1.480989 |
| H  | -0.944974 | 4.099901  | 0.847378  |
| Cu | -1.519056 | -0.202056 | -0.280733 |
| F  | -0.696580 | -1.664780 | -1.286928 |
| C  | -5.520925 | 0.198852  | -0.264572 |
| S  | -4.269599 | -0.407642 | 1.016867  |
| F  | -5.756590 | 1.521079  | -0.115578 |

|   |           |           |           |
|---|-----------|-----------|-----------|
| F | -6.691676 | -0.461997 | -0.118984 |
| F | -5.064140 | -0.014265 | -1.519047 |
| O | -4.068201 | -1.828386 | 0.695609  |
| O | -4.883076 | -0.072875 | 2.308314  |
| O | -3.069444 | 0.472329  | 0.708336  |
| C | 7.484297  | 0.979466  | 1.138581  |
| H | 7.526418  | 1.138692  | 2.226919  |
| H | 8.243587  | 0.217987  | 0.894815  |
| H | 7.772353  | 1.914223  | 0.637954  |
| C | 3.550413  | -2.101992 | 1.795219  |
| H | 2.563847  | -1.825553 | 2.198586  |
| H | 3.406664  | -2.998264 | 1.170865  |
| H | 4.190472  | -2.386196 | 2.641066  |
| C | 3.571423  | 1.349329  | -2.027485 |
| H | 3.259251  | 0.613925  | -2.785702 |
| H | 2.677063  | 1.927975  | -1.745200 |
| H | 4.280646  | 2.042711  | -2.498611 |

### IIa

|                                              |                             |
|----------------------------------------------|-----------------------------|
| Zero-point correction=                       | 0.282598 (Hartree/Particle) |
| Thermal correction to Energy=                | 0.312850                    |
| Thermal correction to Enthalpy=              | 0.313795                    |
| Thermal correction to Gibbs Free Energy=     | 0.214918                    |
| Sum of electronic and zero-point Energies=   | -1850.577876                |
| Sum of electronic and thermal Energies=      | -1850.547624                |
| Sum of electronic and thermal Enthalpies=    | -1850.546680                |
| Sum of electronic and thermal Free Energies= | -1850.645556                |
| E(RB-P86) =                                  | -1850.86047405 A.U          |

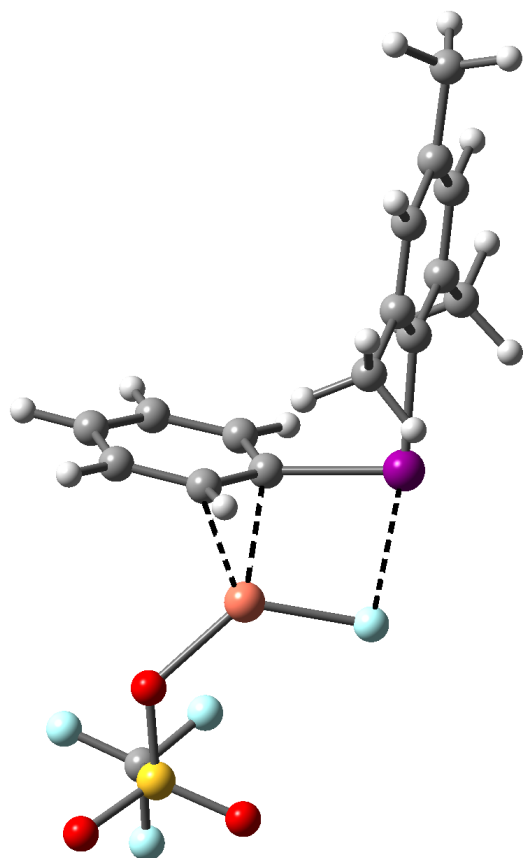

|    |           |           |           |
|----|-----------|-----------|-----------|
| C  | -3.514209 | -0.385755 | 0.083036  |
| C  | -4.161943 | -0.130333 | 1.310214  |
| C  | -4.132760 | -0.175408 | -1.169109 |
| C  | -5.469601 | 0.377802  | 1.247885  |
| C  | -5.439379 | 0.333803  | -1.158694 |
| C  | -6.123473 | 0.618644  | 0.032338  |
| H  | -5.990043 | 0.587838  | 2.186743  |
| H  | -5.935718 | 0.508896  | -2.117739 |
| I  | -1.544708 | -1.249206 | 0.129078  |
| C  | -0.426414 | 0.605025  | -0.026511 |
| C  | -0.123997 | 1.138506  | -1.313895 |
| C  | -0.302142 | 1.401500  | 1.137788  |
| C  | 0.279339  | 2.488359  | -1.407262 |
| H  | -0.310510 | 0.560700  | -2.221267 |
| C  | 0.111823  | 2.726833  | 1.002975  |
| H  | -0.513257 | 0.985440  | 2.122712  |
| C  | 0.382861  | 3.275852  | -0.262564 |
| H  | 0.494124  | 2.904615  | -2.393332 |
| H  | 0.217434  | 3.340309  | 1.900074  |
| H  | 0.682406  | 4.321883  | -0.346885 |
| Cu | 1.432294  | -0.142932 | -0.435847 |
| F  | 0.871812  | -1.942944 | 0.165202  |
| C  | 5.034670  | 0.259147  | 0.988640  |



|   |           |           |           |
|---|-----------|-----------|-----------|
| S | 4.546219  | -0.314362 | -0.747310 |
| F | 4.080498  | -0.072691 | 1.888636  |
| F | 6.194619  | -0.325663 | 1.363616  |
| F | 5.202795  | 1.599740  | 1.022862  |
| O | 4.383548  | -1.769244 | -0.621814 |
| O | 5.625999  | 0.183541  | -1.609344 |
| O | 3.250995  | 0.443332  | -0.973789 |
| C | -3.466680 | -0.461416 | -2.493758 |
| H | -2.617220 | 0.214983  | -2.675423 |
| H | -3.085469 | -1.492435 | -2.548962 |
| H | -4.180880 | -0.321059 | -3.315963 |
| C | -7.537749 | 1.143219  | 0.000810  |
| H | -7.664310 | 1.903472  | -0.784494 |
| H | -8.248483 | 0.329109  | -0.219510 |
| H | -7.824829 | 1.584492  | 0.965386  |
| C | -3.534263 | -0.371842 | 2.663013  |
| H | -3.181009 | -1.408341 | 2.774086  |
| H | -2.672063 | 0.290153  | 2.837818  |
| H | -4.265008 | -0.177919 | 3.459469  |

### TS\_IIa

|                                              |                             |
|----------------------------------------------|-----------------------------|
| Zero-point correction=                       | 0.281235 (Hartree/Particle) |
| Thermal correction to Energy=                | 0.311231                    |
| Thermal correction to Enthalpy=              | 0.312176                    |
| Thermal correction to Gibbs Free Energy=     | 0.213397                    |
| Sum of electronic and zero-point Energies=   | -1850.564996                |
| Sum of electronic and thermal Energies=      | -1850.535000                |
| Sum of electronic and thermal Enthalpies=    | -1850.534056                |
| Sum of electronic and thermal Free Energies= | -1850.632834                |
| E(RB-P86) =                                  | -1850.84623134 A.U          |

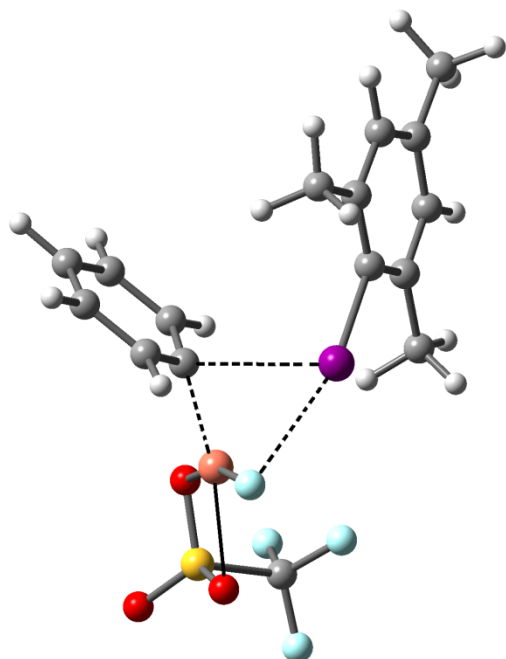

|    |           |           |           |
|----|-----------|-----------|-----------|
| C  | -2.625474 | -0.739743 | -0.439164 |
| C  | -2.420606 | -2.072069 | -0.015380 |
| C  | -3.830555 | -0.037348 | -0.202541 |
| C  | -3.482616 | -2.701084 | 0.651522  |
| C  | -4.849200 | -0.725012 | 0.470408  |
| C  | -4.700042 | -2.052252 | 0.903106  |
| H  | -3.347311 | -3.734203 | 0.984554  |
| H  | -5.790068 | -0.201447 | 0.663505  |
| I  | -1.070254 | 0.250910  | -1.481910 |
| C  | -0.048856 | 1.876435  | 0.507045  |
| C  | -0.241362 | 3.215828  | 0.171419  |
| C  | -0.402651 | 1.322179  | 1.735039  |
| C  | -0.684180 | 4.074587  | 1.189770  |
| H  | -0.016680 | 3.585751  | -0.828895 |
| C  | -0.846545 | 2.205327  | 2.732255  |
| H  | -0.305010 | 0.256403  | 1.943842  |
| C  | -0.988321 | 3.570842  | 2.459896  |
| H  | -0.801799 | 5.137981  | 0.968280  |
| H  | -1.090578 | 1.804817  | 3.719011  |
| H  | -1.356419 | 4.243568  | 3.237389  |
| Cu | 1.523778  | 1.105313  | -0.388000 |
| F  | 1.204642  | 1.857919  | -2.089854 |
| C  | 3.600574  | -2.118675 | 0.308945  |
| S  | 3.685252  | -0.241330 | 0.528847  |
| F  | 2.558493  | -2.452941 | -0.475680 |
| F  | 4.737354  | -2.557684 | -0.266082 |
| F  | 3.457134  | -2.718053 | 1.507090  |
| O  | 3.631619  | 0.311715  | -0.856072 |
| O  | 4.886754  | -0.010710 | 1.325630  |
| O  | 2.369148  | 0.105453  | 1.204019  |
| C  | -1.140140 | -2.831462 | -0.255214 |
| H  | -0.922982 | -2.927557 | -1.330977 |
| H  | -0.276927 | -2.326103 | 0.204399  |
| H  | -1.209298 | -3.841819 | 0.169525  |
| C  | -4.056769 | 1.388353  | -0.640356 |
| H  | -3.320570 | 2.073477  | -0.191184 |
| H  | -3.970777 | 1.493132  | -1.733809 |
| H  | -5.059305 | 1.725669  | -0.344720 |
| C  | -5.830010 | -2.765518 | 1.602207  |
| H  | -6.573039 | -3.124703 | 0.869967  |
| H  | -5.468769 | -3.638511 | 2.163691  |
| H  | -6.358874 | -2.094627 | 2.295513  |

### IIIa

|                                            |                             |
|--------------------------------------------|-----------------------------|
| Zero-point correction=                     | 0.114895 (Hartree/Particle) |
| Thermal correction to Energy=              | 0.131658                    |
| Thermal correction to Enthalpy=            | 0.132602                    |
| Thermal correction to Gibbs Free Energy=   | 0.067156                    |
| Sum of electronic and zero-point Energies= | -1489.624917                |

Sum of electronic and thermal Energies= -1489.608155  
 Sum of electronic and thermal Enthalpies= -1489.607210  
 Sum of electronic and thermal Free Energies= -1489.672656  
 E(RB-P86) = -1489.73981207 A.U.

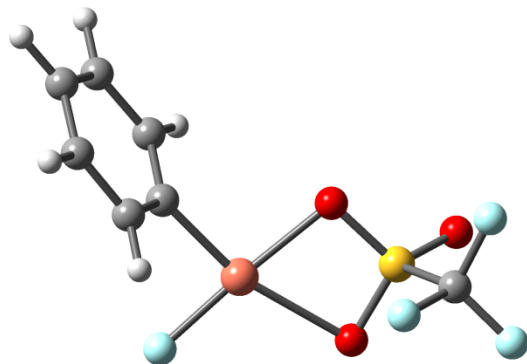

|    |           |           |           |
|----|-----------|-----------|-----------|
| C  | -2.187446 | 0.067700  | -0.034341 |
| C  | -2.728497 | -0.479346 | -1.179148 |
| C  | -2.716890 | 0.012024  | 1.238968  |
| C  | -3.912480 | -1.222817 | -1.002872 |
| H  | -2.285054 | -0.362216 | -2.168120 |
| C  | -3.907551 | -0.730986 | 1.374903  |
| H  | -2.254797 | 0.483331  | 2.107394  |
| C  | -4.494332 | -1.339566 | 0.262485  |
| H  | -4.370827 | -1.688348 | -1.878483 |
| H  | -4.355970 | -0.817703 | 2.367342  |
| H  | -5.420746 | -1.905461 | 0.381715  |
| Cu | -0.500685 | 0.954680  | -0.179164 |
| F  | -1.288716 | 2.222929  | -1.140379 |
| C  | 2.750175  | -0.908574 | -0.467717 |
| S  | 1.863611  | 0.274899  | 0.720815  |
| F  | 2.057225  | -1.013026 | -1.612670 |
| F  | 3.976404  | -0.427922 | -0.729316 |
| F  | 2.855387  | -2.118423 | 0.104578  |
| O  | 1.640578  | 1.538559  | -0.045730 |
| O  | 2.665578  | 0.297433  | 1.931530  |
| O  | 0.464957  | -0.355535 | 0.876610  |

### TS\_IIIa

Zero-point correction= 0.113993 (Hartree/Particle)  
 Thermal correction to Energy= 0.130346  
 Thermal correction to Enthalpy= 0.131291  
 Thermal correction to Gibbs Free Energy= 0.066392  
 Sum of electronic and zero-point Energies= -1489.617973  
 Sum of electronic and thermal Energies= -1489.601619  
 Sum of electronic and thermal Enthalpies= -1489.600675  
 Sum of electronic and thermal Free Energies= -1489.665574  
 E(RB-P86) = -1489.73196584 A.U.

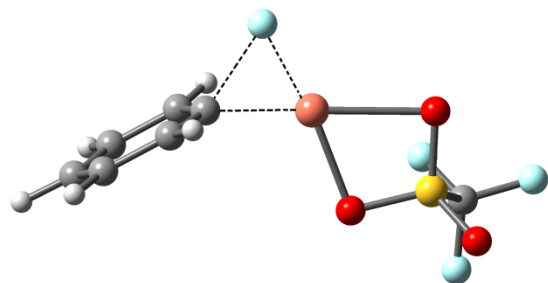

|    |           |           |           |
|----|-----------|-----------|-----------|
| C  | 2.379759  | -0.184053 | -0.273255 |
| C  | 2.618718  | 1.015653  | -0.919470 |
| C  | 3.130461  | -0.737184 | 0.748711  |
| C  | 3.623963  | 1.818512  | -0.353764 |
| H  | 2.047654  | 1.344509  | -1.787901 |
| C  | 4.127775  | 0.094882  | 1.286240  |
| H  | 2.945483  | -1.735940 | 1.144698  |
| C  | 4.372596  | 1.358682  | 0.736161  |
| H  | 3.821488  | 2.797746  | -0.795103 |
| H  | 4.719349  | -0.273638 | 2.127009  |
| H  | 5.169938  | 1.981551  | 1.145819  |
| Cu | 0.522849  | -0.808536 | -0.370231 |
| F  | 1.772205  | -1.541454 | -1.519964 |
| C  | -2.862293 | 0.915813  | -0.212132 |
| S  | -1.924187 | -0.509304 | 0.609469  |
| O  | -2.762765 | -0.934296 | 1.722923  |
| O  | -0.588959 | 0.125363  | 0.993914  |
| O  | -1.637972 | -1.478677 | -0.490765 |
| F  | -2.144927 | 1.414029  | -1.235795 |
| F  | -3.085753 | 1.892497  | 0.686059  |
| F  | -4.042397 | 0.467065  | -0.678397 |

#### IVa

|                                              |                             |
|----------------------------------------------|-----------------------------|
| Zero-point correction=                       | 0.116563 (Hartree/Particle) |
| Thermal correction to Energy=                | 0.133156                    |
| Thermal correction to Enthalpy=              | 0.134100                    |
| Thermal correction to Gibbs Free Energy=     | 0.067432                    |
| Sum of electronic and zero-point Energies=   | -1489.673869                |
| Sum of electronic and thermal Energies=      | -1489.657276                |
| Sum of electronic and thermal Enthalpies=    | -1489.656332                |
| Sum of electronic and thermal Free Energies= | -1489.723000                |
| E(RB-P86) =                                  | -1489.79043170 A.U.         |

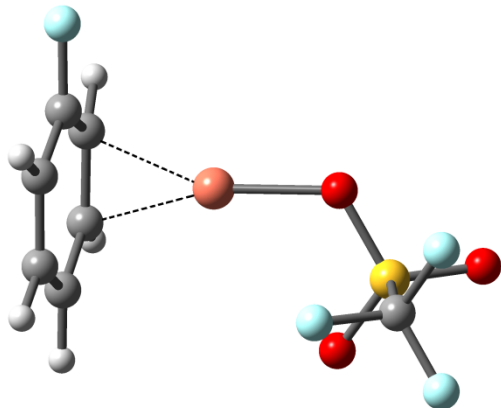

|    |           |           |           |
|----|-----------|-----------|-----------|
| C  | 3.246963  | 0.375895  | -0.717101 |
| C  | 3.097583  | 1.579391  | -0.043784 |
| C  | 2.928356  | -0.870209 | -0.134204 |
| C  | 2.588334  | 1.560454  | 1.266752  |
| H  | 3.372952  | 2.513640  | -0.535176 |
| C  | 2.433035  | -0.870496 | 1.206648  |
| H  | 3.211943  | -1.795101 | -0.641479 |
| C  | 2.248687  | 0.358220  | 1.887632  |
| H  | 2.460787  | 2.503704  | 1.800716  |
| H  | 2.319746  | -1.818066 | 1.739608  |
| H  | 1.870097  | 0.353352  | 2.910390  |
| Cu | 0.839826  | -0.881131 | -0.111475 |
| F  | 3.752534  | 0.378647  | -1.976043 |
| C  | -2.590229 | 1.044840  | -0.160517 |
| S  | -2.129395 | -0.778621 | 0.044110  |
| O  | -3.283125 | -1.512695 | -0.481510 |
| O  | -1.787115 | -0.926227 | 1.465694  |
| O  | -0.918068 | -0.890427 | -0.882142 |
| F  | -1.570523 | 1.839339  | 0.230560  |
| F  | -3.672249 | 1.330759  | 0.595217  |
| F  | -2.879769 | 1.320081  | -1.449282 |

### [Cu(OTf)<sub>2</sub>]<sup>-</sup>

|                                              |                             |
|----------------------------------------------|-----------------------------|
| Zero-point correction=                       | 0.052566 (Hartree/Particle) |
| Thermal correction to Energy=                | 0.071405                    |
| Thermal correction to Enthalpy=              | 0.072350                    |
| Thermal correction to Gibbs Free Energy=     | -0.001625                   |
| Sum of electronic and zero-point Energies=   | -2120.069001                |
| Sum of electronic and thermal Energies=      | -2120.050161                |
| Sum of electronic and thermal Enthalpies=    | -2120.049217                |
| Sum of electronic and thermal Free Energies= | -2120.123192                |

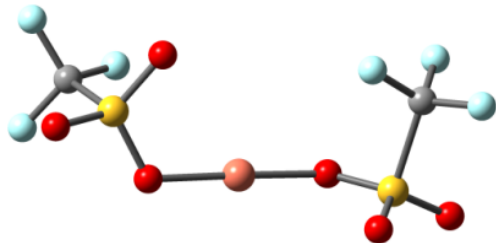

|    |           |           |           |
|----|-----------|-----------|-----------|
| Cu | 0.027233  | -0.911613 | -0.010337 |
| C  | 3.519451  | 0.179099  | 0.787501  |
| C  | -3.203469 | 1.116565  | 0.089369  |
| S  | 2.597208  | 0.275331  | -0.862299 |
| S  | -2.926753 | -0.753773 | 0.018694  |
| O  | 3.645582  | 0.152251  | -1.879161 |
| O  | 1.834285  | 1.527860  | -0.786493 |
| O  | -4.083744 | -1.322616 | 0.716231  |
| O  | -2.750464 | -1.050507 | -1.409135 |
| O  | 1.730473  | -0.983814 | -0.813686 |
| O  | -1.650941 | -0.911185 | 0.847069  |
| F  | -3.337247 | 1.531586  | 1.367057  |
| F  | -4.328157 | 1.438763  | -0.586952 |
| F  | -2.164522 | 1.773874  | -0.469565 |
| F  | 4.227941  | -0.966506 | 0.874009  |
| F  | 2.650395  | 0.225716  | 1.821682  |
| F  | 4.372206  | 1.221229  | 0.897950  |

**lb**

|                                              |                             |
|----------------------------------------------|-----------------------------|
| Zero-point correction=                       | 0.282764 (Hartree/Particle) |
| Thermal correction to Energy=                | 0.313494                    |
| Thermal correction to Enthalpy=              | 0.314438                    |
| Thermal correction to Gibbs Free Energy=     | 0.211047                    |
| Sum of electronic and zero-point Energies=   | -1850.573581                |
| Sum of electronic and thermal Energies=      | -1850.542851                |
| Sum of electronic and thermal Enthalpies=    | -1850.541907                |
| Sum of electronic and thermal Free Energies= | -1850.645298                |
| E(RB-P86) =                                  | -1850.85634493 A.U          |

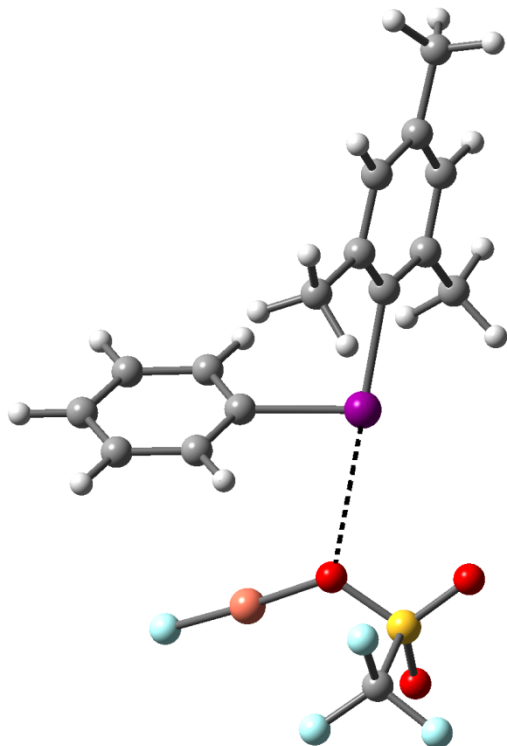

|    |           |           |           |
|----|-----------|-----------|-----------|
| O  | -2.091878 | -0.230152 | -0.310654 |
| C  | 3.020093  | -0.554362 | -0.059594 |
| C  | 3.691148  | -0.791005 | -1.276151 |
| C  | 3.662484  | -0.442620 | 1.189010  |
| C  | 5.088690  | -0.898954 | -1.203445 |
| C  | 5.061686  | -0.554572 | 1.181436  |
| C  | 5.789968  | -0.783037 | 0.005470  |
| H  | 5.640876  | -1.080589 | -2.129817 |
| H  | 5.592232  | -0.462127 | 2.133352  |
| I  | 0.884452  | -0.442108 | -0.126074 |
| C  | 0.589745  | 1.623465  | 0.347006  |
| C  | -0.158861 | 1.917671  | 1.487753  |
| C  | 1.114385  | 2.600332  | -0.498941 |
| C  | -0.384595 | 3.266797  | 1.790941  |
| H  | -0.556222 | 1.131388  | 2.130146  |
| C  | 0.883421  | 3.941293  | -0.166938 |
| H  | 1.685926  | 2.344250  | -1.390821 |
| C  | 0.136807  | 4.272019  | 0.969871  |
| H  | -0.967662 | 3.522393  | 2.677930  |
| H  | 1.285966  | 4.725003  | -0.811836 |
| H  | -0.041199 | 5.320820  | 1.215523  |
| Cu | -2.860548 | 1.406321  | -0.847049 |
| C  | -3.734250 | -1.814435 | 1.066806  |
| F  | -3.517273 | 3.015984  | -1.348964 |
| F  | -4.377298 | -3.001181 | 1.048375  |
| F  | -2.901181 | -1.791486 | 2.127760  |
| F  | -4.646540 | -0.831007 | 1.212151  |
| S  | -2.764446 | -1.590176 | -0.543570 |

|   |           |           |           |
|---|-----------|-----------|-----------|
| O | -1.761856 | -2.661099 | -0.530296 |
| O | -3.779090 | -1.580018 | -1.600453 |
| C | 2.937962  | -0.204523 | 2.488904  |
| H | 2.469720  | 0.792313  | 2.515813  |
| H | 2.141553  | -0.947604 | 2.652672  |
| H | 3.638286  | -0.266441 | 3.331952  |
| C | 3.001427  | -0.949062 | -2.610053 |
| H | 2.330594  | -1.822859 | -2.620479 |
| H | 2.396044  | -0.067244 | -2.869709 |
| H | 3.745426  | -1.092111 | -3.404495 |
| C | 7.290481  | -0.932039 | 0.042952  |
| H | 7.569229  | -1.991839 | 0.169510  |
| H | 7.751430  | -0.582234 | -0.891869 |
| H | 7.728572  | -0.374345 | 0.882768  |

### TS\_ib

|                                              |                             |
|----------------------------------------------|-----------------------------|
| Zero-point correction=                       | 0.282052 (Hartree/Particle) |
| Thermal correction to Energy=                | 0.311933                    |
| Thermal correction to Enthalpy=              | 0.312877                    |
| Thermal correction to Gibbs Free Energy=     | 0.213841                    |
| Sum of electronic and zero-point Energies=   | -1850.569077                |
| Sum of electronic and thermal Energies=      | -1850.539196                |
| Sum of electronic and thermal Enthalpies=    | -1850.538252                |
| Sum of electronic and thermal Free Energies= | -1850.637288                |
| E(RB-P86) =                                  | -1850.85112875 A.U.         |

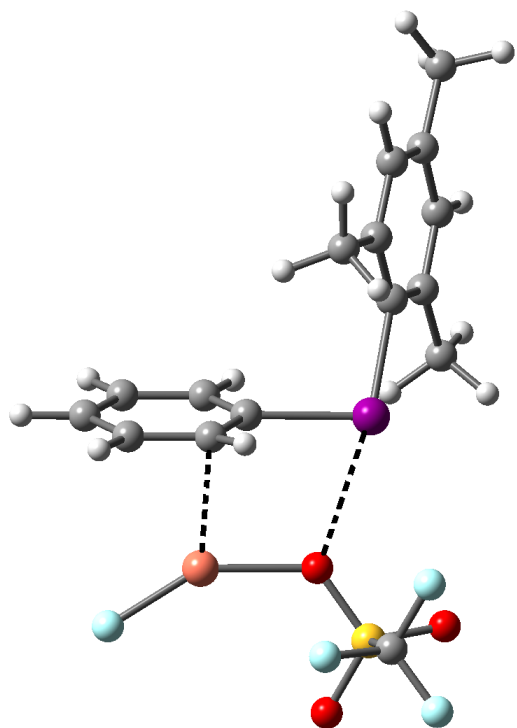

|   |           |           |           |
|---|-----------|-----------|-----------|
| O | -1.984645 | -0.290576 | -0.265711 |
| C | 3.035729  | -0.577872 | 0.039338  |
| C | 3.789443  | -0.954694 | -1.090667 |



|    |           |           |           |
|----|-----------|-----------|-----------|
| C  | 3.598148  | -0.205377 | 1.275803  |
| C  | 5.184651  | -0.929942 | -0.943051 |
| C  | 5.000139  | -0.197966 | 1.345704  |
| C  | 5.807209  | -0.555668 | 0.256959  |
| H  | 5.799856  | -1.214593 | -1.801325 |
| H  | 5.468672  | 0.096473  | 2.288928  |
| I  | 0.903685  | -0.645857 | -0.129897 |
| C  | 0.473609  | 1.444517  | -0.038577 |
| C  | -0.449524 | 1.868041  | 0.936789  |
| C  | 1.068109  | 2.307783  | -0.953608 |
| C  | -0.739541 | 3.250502  | 0.997162  |
| H  | -0.795396 | 1.194523  | 1.723970  |
| C  | 0.762764  | 3.675147  | -0.863805 |
| H  | 1.761529  | 1.950087  | -1.715064 |
| C  | -0.134494 | 4.141876  | 0.101841  |
| H  | -1.404896 | 3.615999  | 1.781144  |
| H  | 1.231149  | 4.369046  | -1.564487 |
| H  | -0.364950 | 5.206983  | 0.161659  |
| Cu | -2.424339 | 1.657239  | -0.166500 |
| C  | -3.698488 | -1.947448 | 0.905109  |
| F  | -3.642652 | 3.029735  | -0.513273 |
| F  | -4.602526 | -2.926629 | 0.685214  |
| F  | -2.739584 | -2.425211 | 1.727468  |
| F  | -4.319472 | -0.919638 | 1.522860  |
| S  | -2.945036 | -1.381600 | -0.735534 |
| O  | -2.219575 | -2.554546 | -1.237089 |
| O  | -4.077946 | -0.869152 | -1.513344 |
| C  | 2.786554  | 0.188463  | 2.483070  |
| H  | 2.244630  | 1.133131  | 2.315958  |
| H  | 2.039853  | -0.579281 | 2.740022  |
| H  | 3.440856  | 0.329648  | 3.353167  |
| C  | 3.187089  | -1.386557 | -2.406211 |
| H  | 2.600114  | -2.312768 | -2.299725 |
| H  | 2.517844  | -0.620226 | -2.826679 |
| H  | 3.980831  | -1.578969 | -3.139787 |
| C  | 7.310528  | -0.567229 | 0.379908  |
| H  | 7.670613  | -1.583314 | 0.613741  |
| H  | 7.791211  | -0.260467 | -0.560415 |
| H  | 7.653050  | 0.098254  | 1.184623  |

## IIb

|                                              |                             |
|----------------------------------------------|-----------------------------|
| Zero-point correction=                       | 0.282514 (Hartree/Particle) |
| Thermal correction to Energy=                | 0.312794                    |
| Thermal correction to Enthalpy=              | 0.313739                    |
| Thermal correction to Gibbs Free Energy=     | 0.214758                    |
| Sum of electronic and zero-point Energies=   | -1850.572726                |
| Sum of electronic and thermal Energies=      | -1850.542446                |
| Sum of electronic and thermal Enthalpies=    | -1850.541502                |
| Sum of electronic and thermal Free Energies= | -1850.640482                |
| E(RB-P86) =                                  | -1850.85524052 A.U          |

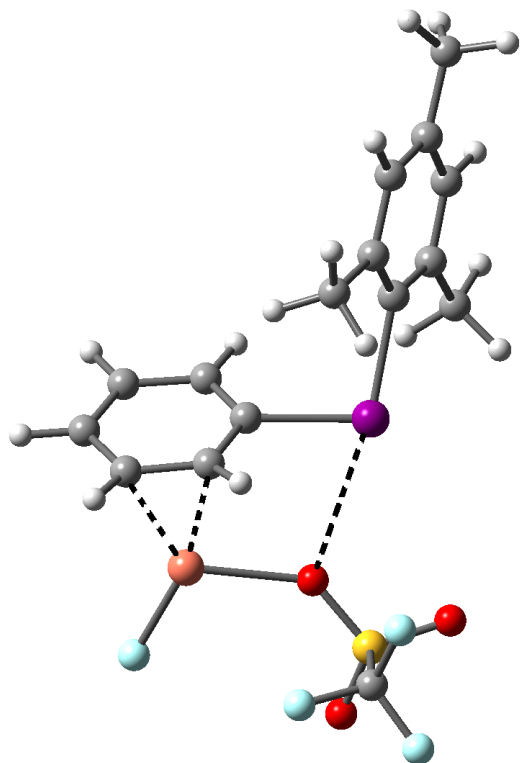

|    |           |           |           |
|----|-----------|-----------|-----------|
| O  | -1.995116 | -0.313356 | -0.488732 |
| C  | 3.040100  | -0.530823 | 0.032765  |
| C  | 3.819768  | -0.915385 | -1.076975 |
| C  | 3.573783  | -0.127898 | 1.272077  |
| C  | 5.211358  | -0.860829 | -0.906226 |
| C  | 4.974141  | -0.092362 | 1.365498  |
| C  | 5.806266  | -0.452666 | 0.296875  |
| H  | 5.846431  | -1.150776 | -1.748100 |
| H  | 5.420545  | 0.226376  | 2.311545  |
| I  | 0.913429  | -0.638484 | -0.180028 |
| C  | 0.415158  | 1.434203  | -0.049241 |
| C  | -0.546866 | 1.781082  | 0.933426  |
| C  | 0.952019  | 2.338322  | -0.948149 |
| C  | -1.011596 | 3.132756  | 0.936458  |
| H  | -0.781280 | 1.106361  | 1.759824  |
| C  | 0.522937  | 3.683926  | -0.878818 |
| H  | 1.685765  | 2.038933  | -1.696878 |
| C  | -0.454882 | 4.071050  | 0.028041  |
| H  | -1.640230 | 3.480073  | 1.759914  |
| H  | 0.956810  | 4.411310  | -1.567266 |
| H  | -0.792841 | 5.108218  | 0.061545  |
| Cu | -2.320506 | 1.819739  | -0.087216 |
| C  | -3.574586 | -1.856097 | 0.990809  |
| F  | -3.951210 | 2.384017  | -0.818971 |
| F  | -4.447484 | -2.887972 | 0.949870  |
| F  | -2.586727 | -2.169464 | 1.860320  |
| F  | -4.223917 | -0.767562 | 1.462501  |
| S  | -2.871232 | -1.522894 | -0.733855 |

|   |           |           |           |
|---|-----------|-----------|-----------|
| O | -2.083755 | -2.727190 | -1.044169 |
| O | -4.053964 | -1.252831 | -1.562033 |
| C | 2.734680  | 0.270012  | 2.458776  |
| H | 2.200141  | 1.216344  | 2.277288  |
| H | 1.979972  | -0.495164 | 2.699572  |
| H | 3.368103  | 0.411810  | 3.344095  |
| C | 3.248940  | -1.393639 | -2.390516 |
| H | 2.685588  | -2.332759 | -2.268896 |
| H | 2.566272  | -0.656937 | -2.840640 |
| H | 4.058818  | -1.583634 | -3.106902 |
| C | 7.307311  | -0.433441 | 0.444228  |
| H | 7.683843  | -1.441274 | 0.687553  |
| H | 7.796628  | -0.120794 | -0.489737 |
| H | 7.623559  | 0.241989  | 1.251344  |

### TS\_IIb

|                                              |                             |
|----------------------------------------------|-----------------------------|
| Zero-point correction=                       | 0.282514 (Hartree/Particle) |
| Thermal correction to Energy=                | 0.312794                    |
| Thermal correction to Enthalpy=              | 0.313739                    |
| Thermal correction to Gibbs Free Energy=     | 0.214758                    |
| Sum of electronic and zero-point Energies=   | -1850.572726                |
| Sum of electronic and thermal Energies=      | -1850.542446                |
| Sum of electronic and thermal Enthalpies=    | -1850.541502                |
| Sum of electronic and thermal Free Energies= | -1850.640482                |
| E(RB-P86) =                                  | -1850.84586101 A.U.         |

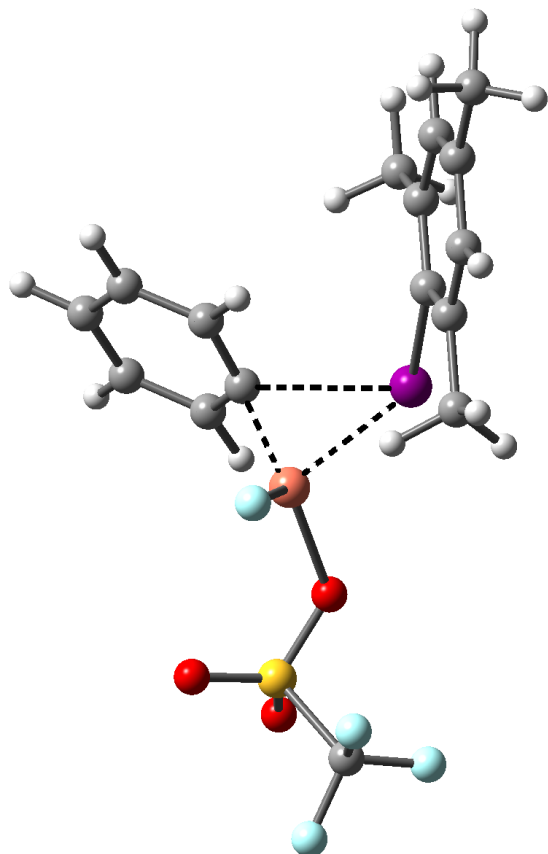

|    |           |           |           |
|----|-----------|-----------|-----------|
| O  | -2.406859 | -0.066679 | -0.571393 |
| C  | 2.725957  | -0.731327 | -0.450314 |
| C  | 3.881918  | 0.011366  | -0.774025 |
| C  | 2.718559  | -1.874920 | 0.381044  |
| C  | 5.084151  | -0.438501 | -0.208951 |
| C  | 3.959519  | -2.260211 | 0.905201  |
| C  | 5.145941  | -1.561941 | 0.627971  |
| H  | 6.000435  | 0.112110  | -0.437892 |
| H  | 3.993639  | -3.140691 | 1.552601  |
| I  | 0.906047  | -0.132733 | -1.349450 |
| C  | 0.366493  | 1.795296  | 0.247968  |
| C  | 1.382123  | 2.040331  | 1.170314  |
| C  | -0.405010 | 2.790285  | -0.356554 |
| C  | 1.526969  | 3.360142  | 1.621431  |
| H  | 2.015602  | 1.244076  | 1.565442  |
| C  | -0.236980 | 4.099493  | 0.119736  |
| H  | -1.134271 | 2.570324  | -1.136871 |
| C  | 0.723184  | 4.380304  | 1.097755  |
| H  | 2.280164  | 3.578094  | 2.381546  |
| H  | -0.854353 | 4.895879  | -0.301318 |
| H  | 0.861088  | 5.407288  | 1.441691  |
| Cu | -0.713939 | 0.199771  | 0.634737  |
| C  | -4.508691 | -1.546022 | 0.062336  |
| F  | -0.635534 | -0.513276 | 2.380221  |
| F  | -5.796475 | -1.503894 | 0.474730  |
| F  | -4.463390 | -2.195055 | -1.123275 |
| F  | -3.796534 | -2.257993 | 0.964072  |
| S  | -3.820505 | 0.207296  | -0.106550 |
| O  | -4.654835 | 0.821194  | -1.149669 |
| O  | -3.903728 | 0.769775  | 1.250222  |
| C  | 3.883166  | 1.220784  | -1.673863 |
| H  | 3.585168  | 0.961058  | -2.702223 |
| H  | 3.189483  | 1.997012  | -1.314410 |
| H  | 4.888246  | 1.659852  | -1.716194 |
| C  | 1.480851  | -2.659789 | 0.727173  |
| H  | 0.766664  | -2.049743 | 1.309526  |
| H  | 0.959818  | -3.017281 | -0.174654 |
| H  | 1.747521  | -3.536606 | 1.331858  |
| C  | 6.453610  | -2.011610 | 1.226875  |
| H  | 6.616827  | -3.087044 | 1.056750  |
| H  | 7.302721  | -1.457678 | 0.804508  |
| H  | 6.453269  | -1.856337 | 2.318339  |

### IIIb

|                                            |                             |
|--------------------------------------------|-----------------------------|
| Zero-point correction=                     | 0.282739 (Hartree/Particle) |
| Thermal correction to Energy=              | 0.312894                    |
| Thermal correction to Enthalpy=            | 0.313838                    |
| Thermal correction to Gibbs Free Energy=   | 0.215430                    |
| Sum of electronic and zero-point Energies= | -1850.576582                |
| Sum of electronic and thermal Energies=    | -1850.546427                |
| Sum of electronic and thermal Enthalpies=  | -1850.545483                |

Sum of electronic and thermal Free Energies= -1850.643891  
E(RB-P86) = -1850.85932126 A.U.

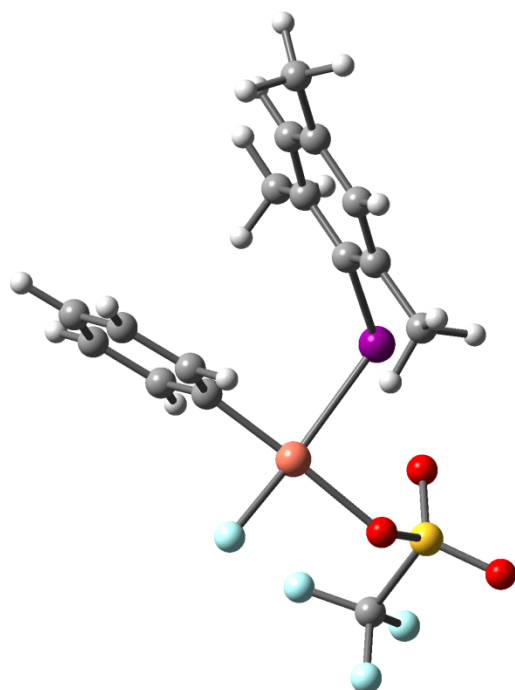

|    |           |           |           |
|----|-----------|-----------|-----------|
| O  | 2.426748  | -0.484939 | -1.104619 |
| C  | -2.389203 | -1.027339 | 0.236110  |
| C  | -3.254273 | -0.495317 | 1.215383  |
| C  | -2.836424 | -1.587184 | -0.980919 |
| C  | -4.626494 | -0.529467 | 0.927309  |
| C  | -4.220914 | -1.582480 | -1.203273 |
| C  | -5.129090 | -1.058141 | -0.270761 |
| H  | -5.322177 | -0.128545 | 1.669688  |
| H  | -4.596934 | -2.009094 | -2.137521 |
| I  | -0.312105 | -1.094485 | 0.670918  |
| C  | -0.595616 | 1.950996  | -0.286832 |
| C  | -1.656995 | 2.039141  | -1.171639 |
| C  | -0.411077 | 2.784966  | 0.805324  |
| C  | -2.615450 | 3.040771  | -0.929055 |
| H  | -1.760850 | 1.383465  | -2.037417 |
| C  | -1.385332 | 3.777074  | 1.026445  |
| H  | 0.440909  | 2.693576  | 1.480859  |
| C  | -2.477913 | 3.901516  | 0.163504  |
| H  | -3.459314 | 3.139056  | -1.615899 |
| H  | -1.272219 | 4.441370  | 1.886494  |
| H  | -3.226365 | 4.676549  | 0.342745  |
| Cu | 0.835679  | 0.731009  | -0.692952 |
| C  | 4.661940  | 0.190534  | 0.194824  |
| F  | 1.518886  | 2.078014  | -1.728251 |
| F  | 5.570195  | -0.250647 | 1.091653  |
| F  | 5.295698  | 0.454032  | -0.966444 |
| F  | 4.119680  | 1.335898  | 0.660547  |

|   |           |           |           |
|---|-----------|-----------|-----------|
| S | 3.324594  | -1.122552 | -0.061884 |
| O | 4.048949  | -2.284675 | -0.582798 |
| O | 2.675807  | -1.244604 | 1.259296  |
| C | -2.780679 | 0.076243  | 2.527994  |
| H | -2.286910 | -0.689949 | 3.147004  |
| H | -2.057692 | 0.892732  | 2.377566  |
| H | -3.629968 | 0.474287  | 3.098836  |
| C | -1.916346 | -2.177095 | -2.019967 |
| H | -1.197262 | -1.434707 | -2.400345 |
| H | -1.330253 | -3.015918 | -1.612567 |
| H | -2.496844 | -2.551324 | -2.873410 |
| C | -6.608691 | -1.045235 | -0.560636 |
| H | -6.917147 | -1.944753 | -1.113208 |
| H | -7.199159 | -0.978895 | 0.363920  |
| H | -6.871288 | -0.174387 | -1.185105 |

### TS\_IIIb

|                                              |                             |
|----------------------------------------------|-----------------------------|
| Zero-point correction=                       | 0.281504 (Hartree/Particle) |
| Thermal correction to Energy=                | 0.311299                    |
| Thermal correction to Enthalpy=              | 0.312243                    |
| Thermal correction to Gibbs Free Energy=     | 0.214406                    |
| Sum of electronic and zero-point Energies=   | -1850.569708                |
| Sum of electronic and thermal Energies=      | -1850.539913                |
| Sum of electronic and thermal Enthalpies=    | -1850.538968                |
| Sum of electronic and thermal Free Energies= | -1850.636805                |
| E(RB-P86) =                                  | -1850.85121151 A.U          |

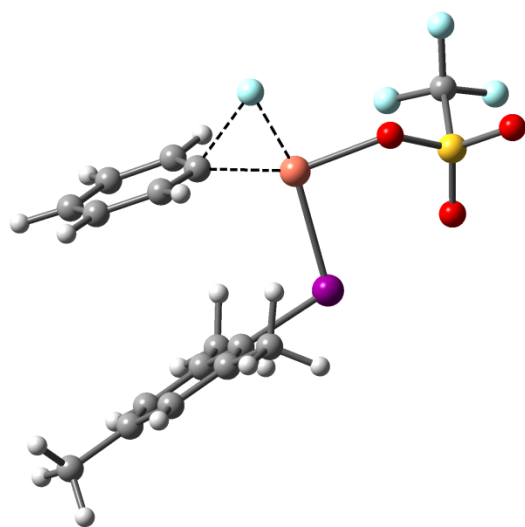

|   |           |          |           |
|---|-----------|----------|-----------|
| C | 0.646917  | 2.165938 | -0.405014 |
| C | 0.667218  | 2.737571 | 0.858603  |
| C | 1.678616  | 2.222659 | -1.329435 |
| C | 1.899254  | 3.261090 | 1.284159  |
| H | -0.209272 | 2.758977 | 1.506986  |
| C | 2.894850  | 2.758364 | -0.873994 |
| H | 1.570120  | 1.860915 | -2.352253 |
| C | 3.002260  | 3.276033 | 0.421714  |

|    |           |           |           |
|----|-----------|-----------|-----------|
| H  | 1.972284  | 3.676136  | 2.291914  |
| H  | 3.744960  | 2.786021  | -1.559067 |
| H  | 3.943564  | 3.718727  | 0.753183  |
| Cu | -0.787428 | 0.830607  | -0.687781 |
| F  | -1.053635 | 2.596024  | -1.300514 |
| C  | 4.333190  | -1.200071 | -1.029950 |
| C  | 2.936202  | -1.326759 | -1.047462 |
| C  | 2.262394  | -1.128587 | 0.175926  |
| C  | 2.922890  | -0.835411 | 1.383796  |
| C  | 4.322939  | -0.725052 | 1.330029  |
| C  | 5.044225  | -0.900028 | 0.141944  |
| H  | 4.878469  | -1.344095 | -1.967500 |
| H  | 4.860218  | -0.496345 | 2.254982  |
| I  | 0.144850  | -1.380740 | 0.218375  |
| C  | -4.444416 | 0.286250  | 0.768554  |
| F  | -5.303391 | -0.427951 | 1.528296  |
| F  | -5.139766 | 1.246602  | 0.122595  |
| F  | -3.546903 | 0.883552  | 1.585142  |
| S  | -3.566929 | -0.848527 | -0.463781 |
| O  | -4.643010 | -1.374888 | -1.310003 |
| O  | -2.841852 | -1.811144 | 0.389701  |
| O  | -2.659674 | 0.110825  | -1.198089 |
| C  | 2.232971  | -1.666243 | -2.338108 |
| H  | 1.703942  | -2.630262 | -2.266461 |
| H  | 1.481345  | -0.907212 | -2.606375 |
| H  | 2.956120  | -1.735280 | -3.161667 |
| C  | 2.212091  | -0.649661 | 2.701631  |
| H  | 1.670945  | -1.561390 | 3.001227  |
| H  | 2.933867  | -0.409190 | 3.493715  |
| H  | 1.473826  | 0.165941  | 2.654310  |
| C  | 6.548919  | -0.781607 | 0.118175  |
| H  | 7.014800  | -1.744906 | -0.145952 |
| H  | 6.877280  | -0.049239 | -0.636073 |
| H  | 6.943154  | -0.470072 | 1.095344  |

#### IVb

|                                              |                             |
|----------------------------------------------|-----------------------------|
| Zero-point correction=                       | 0.283928 (Hartree/Particle) |
| Thermal correction to Energy=                | 0.313940                    |
| Thermal correction to Enthalpy=              | 0.314884                    |
| Thermal correction to Gibbs Free Energy=     | 0.215457                    |
| Sum of electronic and zero-point Energies=   | -1850.627902                |
| Sum of electronic and thermal Energies=      | -1850.597890                |
| Sum of electronic and thermal Enthalpies=    | -1850.596946                |
| Sum of electronic and thermal Free Energies= | -1850.696373                |
| E(RB-P86) =                                  | -1850.91183035 A.U          |

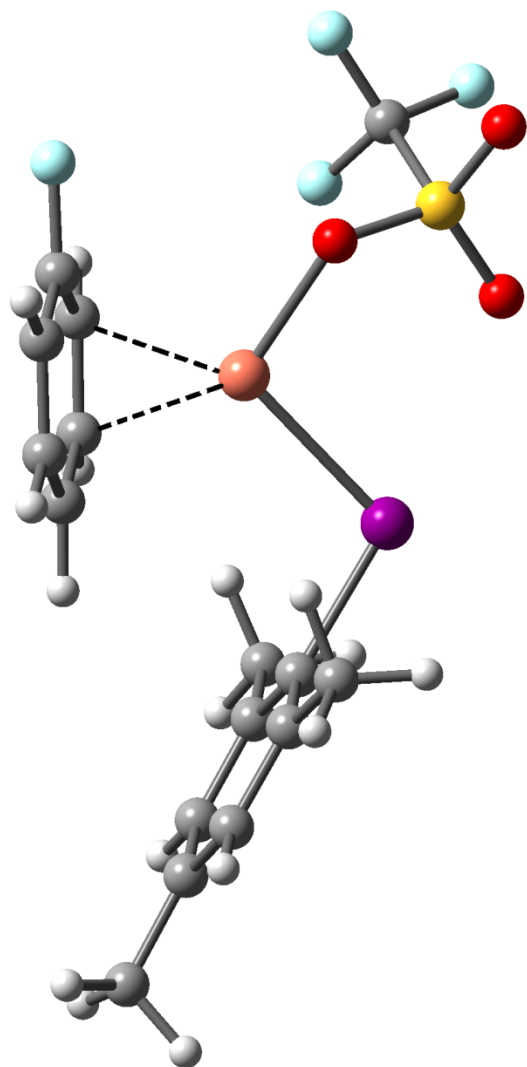

|    |           |           |           |
|----|-----------|-----------|-----------|
| C  | -1.341077 | 3.499115  | 0.305796  |
| C  | -0.918754 | 2.502973  | 1.210343  |
| C  | -0.484486 | 4.107777  | -0.594986 |
| C  | 0.458334  | 2.129929  | 1.195109  |
| H  | -1.592255 | 2.171676  | 2.004079  |
| C  | 0.869616  | 3.717204  | -0.605466 |
| H  | -0.861140 | 4.876719  | -1.271014 |
| C  | 1.342445  | 2.748298  | 0.275109  |
| H  | 0.853875  | 1.507915  | 2.001519  |
| H  | 1.553738  | 4.195082  | -1.309238 |
| H  | 2.396888  | 2.468808  | 0.274868  |
| Cu | -0.657459 | 0.675779  | 0.107369  |
| F  | -2.646712 | 3.880149  | 0.344614  |
| C  | 4.765167  | 0.123125  | -0.905392 |
| C  | 3.424259  | -0.225009 | -1.133709 |
| C  | 2.743000  | -0.874323 | -0.084971 |
| C  | 3.346709  | -1.181511 | 1.147610  |
| C  | 4.692945  | -0.807632 | 1.310769  |
| C  | 5.418486  | -0.160086 | 0.303217  |



|   |           |           |           |
|---|-----------|-----------|-----------|
| H | 5.311705  | 0.631502  | -1.705679 |
| H | 5.181470  | -1.036023 | 2.262694  |
| I | 0.711503  | -1.469720 | -0.407281 |
| C | -4.090812 | -1.015587 | 0.794897  |
| F | -4.756559 | -2.184845 | 0.918833  |
| F | -4.980507 | -0.004169 | 0.896020  |
| F | -3.212086 | -0.914302 | 1.819216  |
| S | -3.185546 | -0.949177 | -0.865190 |
| O | -4.256558 | -0.957075 | -1.868548 |
| O | -2.283783 | -2.117009 | -0.828555 |
| O | -2.471564 | 0.381031  | -0.784466 |
| C | 2.782684  | 0.100339  | -2.459532 |
| H | 2.483793  | -0.813973 | -2.997508 |
| H | 1.872563  | 0.706738  | -2.328459 |
| H | 3.480096  | 0.659543  | -3.097878 |
| C | 2.627419  | -1.883728 | 2.272855  |
| H | 2.291455  | -2.889340 | 1.972438  |
| H | 3.289410  | -1.992310 | 3.142760  |
| H | 1.730872  | -1.328100 | 2.590807  |
| C | 6.869257  | 0.211919  | 0.499818  |
| H | 7.525650  | -0.426570 | -0.114451 |
| H | 7.058816  | 1.253254  | 0.196862  |
| H | 7.175308  | 0.095606  | 1.549013  |

**b. Copper species for reaction of [Mes(Ph)I]<sup>+</sup> with [CuF(OTf)]<sup>-</sup> with mesityl transfer (Figure 3 and Figure S1)**

**la\_Mes**

|                                              |                             |
|----------------------------------------------|-----------------------------|
| Zero-point correction=                       | 0.282934 (Hartree/Particle) |
| Thermal correction to Energy=                | 0.313365                    |
| Thermal correction to Enthalpy=              | 0.314309                    |
| Thermal correction to Gibbs Free Energy=     | 0.213151                    |
| Sum of electronic and zero-point Energies=   | -1850.582163                |
| Sum of electronic and thermal Energies=      | -1850.551732                |
| Sum of electronic and thermal Enthalpies=    | -1850.550787                |
| Sum of electronic and thermal Free Energies= | -1850.651945                |
| E(RB-P86) =                                  | -1850.86509658 A.U.         |

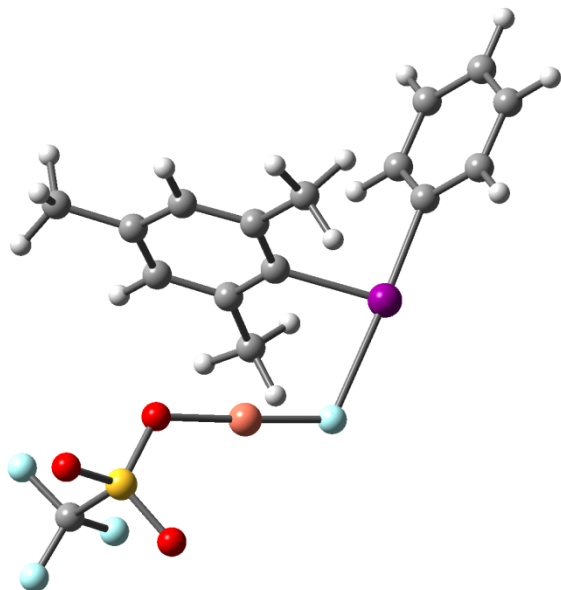

|    |           |           |           |
|----|-----------|-----------|-----------|
| C  | 4.233300  | -0.369430 | -0.087343 |
| C  | 4.652395  | 0.632121  | -0.967504 |
| C  | 5.075756  | -0.894974 | 0.896514  |
| C  | 5.956579  | 1.126016  | -0.845104 |
| H  | 3.986747  | 1.030957  | -1.734885 |
| C  | 6.382313  | -0.397905 | 0.995109  |
| H  | 4.730741  | -1.672938 | 1.580376  |
| C  | 6.819457  | 0.611119  | 0.130400  |
| H  | 6.296768  | 1.912194  | -1.522560 |
| H  | 7.051759  | -0.799202 | 1.758948  |
| H  | 7.836576  | 0.999108  | 0.216296  |
| I  | 2.261426  | -1.201092 | -0.264895 |
| C  | 1.206183  | 0.650715  | -0.062744 |
| C  | 1.179738  | 1.267903  | 1.201322  |
| C  | 0.574071  | 1.162458  | -1.211769 |
| C  | 0.491606  | 2.489871  | 1.278513  |
| C  | -0.101149 | 2.383355  | -1.054183 |
| C  | -0.145964 | 3.064673  | 0.170410  |
| H  | 0.450953  | 2.997435  | 2.246472  |
| H  | -0.610649 | 2.806418  | -1.924518 |
| Cu | -1.509546 | -1.093949 | 0.214550  |
| F  | -0.126961 | -2.100342 | -0.464529 |
| C  | -4.931465 | 0.128461  | -0.771663 |
| S  | -4.339315 | -0.496657 | 0.914059  |
| F  | -4.802815 | 1.469807  | -0.855526 |
| F  | -6.232876 | -0.189597 | -0.948765 |
| F  | -4.213870 | -0.433585 | -1.769863 |
| O  | -4.501748 | -1.954897 | 0.847642  |
| O  | -5.143348 | 0.252259  | 1.885079  |
| O  | -2.885548 | -0.028310 | 0.931159  |
| C  | 1.831149  | 0.695363  | 2.433899  |
| H  | 1.492779  | -0.334107 | 2.630077  |
| H  | 2.928463  | 0.669311  | 2.337583  |

|   |           |           |           |
|---|-----------|-----------|-----------|
| H | 1.586346  | 1.307158  | 3.311867  |
| C | 0.566120  | 0.465929  | -2.549746 |
| H | 1.580342  | 0.376997  | -2.970922 |
| H | 0.153728  | -0.551053 | -2.460190 |
| H | -0.047898 | 1.027266  | -3.266056 |
| C | -0.851779 | 4.392705  | 0.289335  |
| H | -0.151643 | 5.221080  | 0.088048  |
| H | -1.675139 | 4.475861  | -0.434260 |
| H | -1.255575 | 4.543202  | 1.300702  |

### TS\_la\_Mes

|                                              |                             |
|----------------------------------------------|-----------------------------|
| Zero-point correction=                       | 0.282121 (Hartree/Particle) |
| Thermal correction to Energy=                | 0.311919                    |
| Thermal correction to Enthalpy=              | 0.312863                    |
| Thermal correction to Gibbs Free Energy=     | 0.212438                    |
| Sum of electronic and zero-point Energies=   | -1850.579459                |
| Sum of electronic and thermal Energies=      | -1850.549661                |
| Sum of electronic and thermal Enthalpies=    | -1850.548717                |
| Sum of electronic and thermal Free Energies= | -1850.649142                |
| E(RB-P86) =                                  | -1850.86158017 A.U.         |

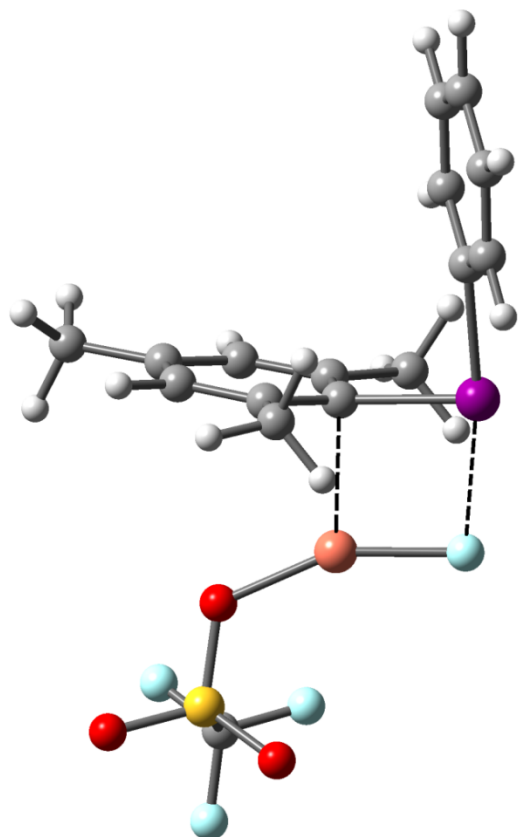

|   |           |           |           |
|---|-----------|-----------|-----------|
| C | -4.026013 | -0.323204 | 0.012151  |
| C | -4.388775 | 0.686356  | 0.908918  |
| C | -4.879246 | -0.742410 | -1.013933 |
| C | -5.639683 | 1.297142  | 0.761120  |
| H | -3.719550 | 1.000812  | 1.711542  |

|    |           |           |           |
|----|-----------|-----------|-----------|
| C  | -6.134003 | -0.131200 | -1.137753 |
| H  | -4.581491 | -1.528727 | -1.710534 |
| C  | -6.510796 | 0.887571  | -0.256366 |
| H  | -5.933374 | 2.090677  | 1.451647  |
| H  | -6.810015 | -0.451193 | -1.933549 |
| H  | -7.487081 | 1.365435  | -0.361432 |
| I  | -2.157145 | -1.358992 | 0.224870  |
| C  | -0.927052 | 0.419364  | 0.119996  |
| C  | -0.886486 | 1.119867  | -1.113078 |
| C  | -0.468220 | 0.968923  | 1.349193  |
| C  | -0.312020 | 2.400207  | -1.084989 |
| C  | 0.093272  | 2.253904  | 1.287342  |
| C  | 0.172902  | 2.986042  | 0.092876  |
| H  | -0.251649 | 2.955417  | -2.025316 |
| H  | 0.472643  | 2.693504  | 2.214007  |
| Cu | 1.103501  | -0.630831 | -0.048070 |
| F  | 0.150000  | -2.244655 | 0.372536  |
| C  | 4.979335  | -0.243442 | 0.589503  |
| S  | 3.938447  | -0.195366 | -0.989411 |
| F  | 5.166134  | 1.002482  | 1.078336  |
| F  | 6.190523  | -0.785724 | 0.329808  |
| F  | 4.373980  | -0.988719 | 1.541004  |
| O  | 3.790527  | -1.605496 | -1.379111 |
| O  | 4.685933  | 0.694268  | -1.886827 |
| O  | 2.653692  | 0.449172  | -0.493040 |
| C  | -1.424682 | 0.564758  | -2.406662 |
| H  | -1.134796 | -0.485867 | -2.557047 |
| H  | -2.525865 | 0.609982  | -2.430503 |
| H  | -1.049269 | 1.149728  | -3.256484 |
| C  | -0.567637 | 0.252503  | 2.674711  |
| H  | -1.605239 | 0.236405  | 3.046973  |
| H  | -0.226978 | -0.790905 | 2.600551  |
| H  | 0.048374  | 0.764272  | 3.425671  |
| C  | 0.793783  | 4.359694  | 0.070542  |
| H  | 0.670891  | 4.871808  | 1.035576  |
| H  | 1.876206  | 4.289703  | -0.129791 |
| H  | 0.354138  | 4.985045  | -0.719561 |

### Ila\_Mes

|                                              |                             |
|----------------------------------------------|-----------------------------|
| Zero-point correction=                       | 0.282121 (Hartree/Particle) |
| Thermal correction to Energy=                | 0.311919                    |
| Thermal correction to Enthalpy=              | 0.312863                    |
| Thermal correction to Gibbs Free Energy=     | 0.212438                    |
| Sum of electronic and zero-point Energies=   | -1850.579459                |
| Sum of electronic and thermal Energies=      | -1850.549661                |
| Sum of electronic and thermal Enthalpies=    | -1850.548717                |
| Sum of electronic and thermal Free Energies= | -1850.649142                |
| E(RB-P86) =                                  | -1850.86236341 A.U.         |

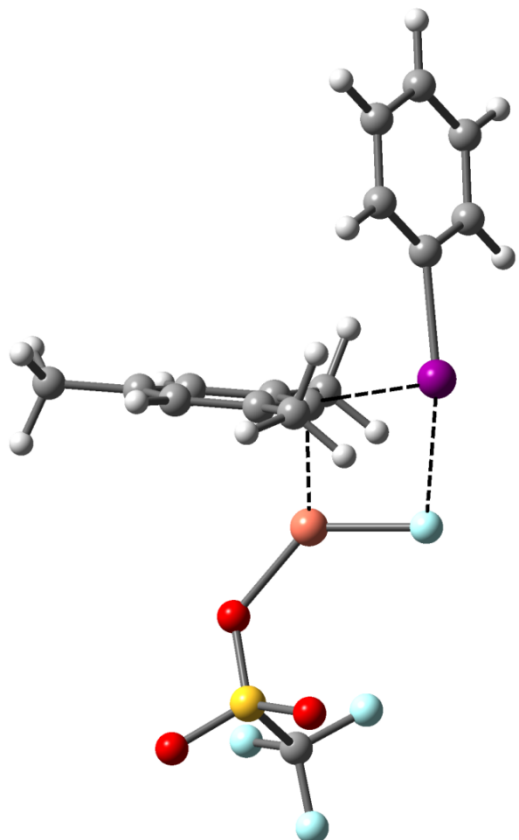

|    |           |           |           |
|----|-----------|-----------|-----------|
| C  | -3.855140 | -0.661185 | 0.082952  |
| C  | -4.486812 | -1.292815 | 1.160160  |
| C  | -4.485165 | 0.351634  | -0.647958 |
| C  | -5.784225 | -0.896346 | 1.509656  |
| H  | -3.985486 | -2.082863 | 1.722917  |
| C  | -5.775679 | 0.746414  | -0.276263 |
| H  | -3.992969 | 0.832534  | -1.494871 |
| C  | -6.424590 | 0.122814  | 0.796878  |
| H  | -6.287299 | -1.385143 | 2.346763  |
| H  | -6.275586 | 1.539513  | -0.836566 |
| H  | -7.433785 | 0.432436  | 1.076535  |
| I  | -1.904661 | -1.371168 | -0.467316 |
| C  | -0.903490 | 0.535321  | -0.113223 |
| C  | -0.731860 | 1.410817  | -1.234720 |
| C  | -0.792595 | 0.989296  | 1.237743  |
| C  | -0.449307 | 2.756774  | -0.950628 |
| C  | -0.510253 | 2.352717  | 1.426135  |
| C  | -0.355523 | 3.250132  | 0.359926  |
| H  | -0.305191 | 3.438349  | -1.793615 |
| H  | -0.418127 | 2.717905  | 2.452952  |
| Cu | 1.037473  | -0.022320 | -0.275739 |
| F  | 0.474162  | -1.839460 | -0.888555 |
| C  | 4.707019  | -0.924727 | 0.909499  |
| S  | 4.109194  | 0.175529  | -0.508821 |
| F  | 3.806411  | -1.897389 | 1.175360  |
| F  | 5.880823  | -1.510141 | 0.580449  |

|   |           |           |           |
|---|-----------|-----------|-----------|
| F | 4.893573  | -0.198291 | 2.033896  |
| O | 3.909042  | -0.748949 | -1.634061 |
| O | 5.155292  | 1.198283  | -0.636178 |
| O | 2.822778  | 0.748106  | 0.059041  |
| C | -1.022690 | 0.099431  | 2.433754  |
| H | -0.569090 | 0.544790  | 3.329084  |
| H | -2.101202 | -0.019138 | 2.631075  |
| H | -0.598885 | -0.905296 | 2.295704  |
| C | -0.049574 | 4.704015  | 0.615258  |
| H | -0.466940 | 5.038216  | 1.575710  |
| H | 1.040752  | 4.867291  | 0.654848  |
| H | -0.447856 | 5.344266  | -0.184779 |
| C | -0.887141 | 0.960247  | -2.668258 |
| H | -0.434450 | -0.026389 | -2.841662 |
| H | -1.950250 | 0.891772  | -2.952121 |
| H | -0.409907 | 1.683274  | -3.342898 |

### TS\_Ila\_Mes

|                                              |                             |
|----------------------------------------------|-----------------------------|
| Zero-point correction=                       | 0.281143 (Hartree/Particle) |
| Thermal correction to Energy=                | 0.311175                    |
| Thermal correction to Enthalpy=              | 0.312119                    |
| Thermal correction to Gibbs Free Energy=     | 0.213347                    |
| Sum of electronic and zero-point Energies=   | -1850.562804                |
| Sum of electronic and thermal Energies=      | -1850.532772                |
| Sum of electronic and thermal Enthalpies=    | -1850.531828                |
| Sum of electronic and thermal Free Energies= | -1850.630600                |
| E(RB-P86) =                                  | -1850.84394702 A.U.         |

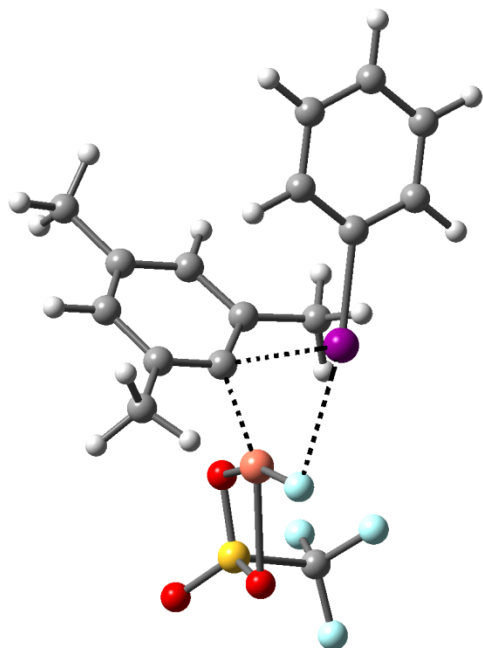

|   |           |           |           |
|---|-----------|-----------|-----------|
| C | -3.730430 | -0.945470 | 0.310916  |
| C | -3.990789 | -1.555334 | 1.546545  |
| C | -4.614840 | -0.002835 | -0.232447 |
| C | -5.160810 | -1.220857 | 2.237669  |

|    |           |           |           |
|----|-----------|-----------|-----------|
| H  | -3.297324 | -2.287127 | 1.964655  |
| C  | -5.778127 | 0.324681  | 0.473395  |
| H  | -4.404906 | 0.467493  | -1.194464 |
| C  | -6.052804 | -0.281681 | 1.705439  |
| H  | -5.371457 | -1.698122 | 3.197431  |
| H  | -6.471452 | 1.057101  | 0.053665  |
| H  | -6.962457 | -0.021994 | 2.251167  |
| I  | -1.978606 | -1.466910 | -0.752761 |
| C  | -0.218147 | 0.944890  | -0.344546 |
| C  | -0.568632 | 1.780757  | -1.403650 |
| C  | -0.368287 | 1.213776  | 1.022685  |
| C  | -0.924575 | 3.094000  | -1.023541 |
| C  | -0.734189 | 2.537612  | 1.318805  |
| C  | -1.012330 | 3.485481  | 0.316537  |
| H  | -1.156872 | 3.808363  | -1.819859 |
| H  | -0.809602 | 2.820539  | 2.373574  |
| Cu | 1.334520  | -0.203877 | -0.784200 |
| F  | 0.584777  | -1.502021 | -1.848295 |
| C  | 4.543604  | -0.832800 | 1.273988  |
| S  | 3.940633  | 0.199535  | -0.193874 |
| F  | 3.591484  | -1.704689 | 1.656837  |
| F  | 5.647521  | -1.518436 | 0.919631  |
| F  | 4.842447  | -0.026414 | 2.310502  |
| O  | 3.499950  | -0.797831 | -1.213107 |
| O  | 5.055424  | 1.083397  | -0.518094 |
| O  | 2.688114  | 0.882259  | 0.330547  |
| C  | -0.095348 | 0.216947  | 2.118852  |
| H  | -0.328690 | 0.650019  | 3.100290  |
| H  | -0.699758 | -0.693066 | 1.984210  |
| H  | 0.963225  | -0.086467 | 2.119860  |
| C  | -1.419352 | 4.890328  | 0.689218  |
| H  | -2.166951 | 4.888643  | 1.496761  |
| H  | -0.549382 | 5.460663  | 1.055542  |
| H  | -1.835694 | 5.429918  | -0.172322 |
| C  | -0.554455 | 1.384818  | -2.860208 |
| H  | -0.354369 | 0.312694  | -2.979833 |
| H  | -1.523404 | 1.621845  | -3.325249 |
| H  | 0.217081  | 1.951124  | -3.406111 |

### IIIa\_Mes

|                                              |                             |
|----------------------------------------------|-----------------------------|
| Zero-point correction=                       | 0.194304 (Hartree/Particle) |
| Thermal correction to Energy=                | 0.216679                    |
| Thermal correction to Enthalpy=              | 0.217624                    |
| Thermal correction to Gibbs Free Energy=     | 0.139403                    |
| Sum of electronic and zero-point Energies=   | -1607.526803                |
| Sum of electronic and thermal Energies=      | -1607.504427                |
| Sum of electronic and thermal Enthalpies=    | -1607.503483                |
| Sum of electronic and thermal Free Energies= | -1607.581703                |
| E(RB-P86) =                                  | -1607.72110639 A.U.         |

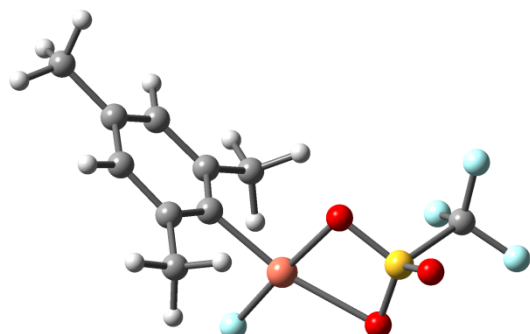

|    |           |           |           |
|----|-----------|-----------|-----------|
| C  | -1.747614 | -0.128820 | 0.273049  |
| C  | -2.454933 | -1.102688 | -0.410368 |
| C  | -2.128870 | 1.161672  | 0.593443  |
| C  | -3.688023 | -0.649997 | -0.930074 |
| C  | -3.374285 | 1.538005  | 0.041273  |
| C  | -4.154658 | 0.655116  | -0.718186 |
| H  | -4.287223 | -1.363809 | -1.504022 |
| H  | -3.726694 | 2.555410  | 0.238672  |
| Cu | 0.027395  | -0.659188 | 0.808949  |
| F  | -0.642948 | -1.093776 | 2.397214  |
| C  | 3.198249  | 1.038700  | -0.383380 |
| S  | 2.302554  | -0.628323 | -0.513965 |
| F  | 2.618371  | 1.804847  | 0.554752  |
| F  | 4.481144  | 0.819879  | -0.048606 |
| F  | 3.147287  | 1.668240  | -1.568835 |
| O  | 2.221331  | -1.161322 | 0.877823  |
| O  | 3.020272  | -1.378411 | -1.531484 |
| O  | 0.862526  | -0.233182 | -0.893667 |
| C  | -1.307557 | 2.113332  | 1.426626  |
| H  | -1.910325 | 2.979543  | 1.729269  |
| H  | -0.928627 | 1.615530  | 2.331264  |
| H  | -0.440822 | 2.484526  | 0.857035  |
| C  | -5.477085 | 1.102097  | -1.298119 |
| H  | -5.955432 | 1.862512  | -0.664596 |
| H  | -5.330952 | 1.548647  | -2.295864 |
| H  | -6.170072 | 0.256745  | -1.413867 |
| C  | -1.969815 | -2.516147 | -0.616722 |
| H  | -1.723798 | -2.992078 | 0.344997  |
| H  | -2.739052 | -3.120048 | -1.115159 |
| H  | -1.062491 | -2.534364 | -1.241166 |

### TS\_IIIa\_Mes

|                                              |                             |
|----------------------------------------------|-----------------------------|
| Zero-point correction=                       | 0.193505 (Hartree/Particle) |
| Thermal correction to Energy=                | 0.215501                    |
| Thermal correction to Enthalpy=              | 0.216446                    |
| Thermal correction to Gibbs Free Energy=     | 0.138420                    |
| Sum of electronic and zero-point Energies=   | -1607.521531                |
| Sum of electronic and thermal Energies=      | -1607.499535                |
| Sum of electronic and thermal Enthalpies=    | -1607.498591                |
| Sum of electronic and thermal Free Energies= | -1607.576616                |
| E(RB-P86) =                                  | -1607.71503628 A.U          |



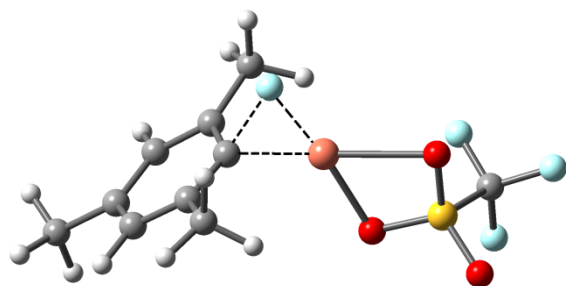

|    |           |           |           |
|----|-----------|-----------|-----------|
| C  | -1.910385 | -0.211759 | 0.469032  |
| C  | -2.248344 | 1.102838  | 0.773436  |
| C  | -2.638508 | -1.139511 | -0.267312 |
| C  | -3.338769 | 1.590634  | 0.028566  |
| C  | -3.715825 | -0.574538 | -0.977676 |
| C  | -4.075034 | 0.776417  | -0.847998 |
| H  | -3.621465 | 2.638292  | 0.169965  |
| H  | -4.292052 | -1.233777 | -1.633858 |
| Cu | 0.014239  | -0.668312 | 0.648056  |
| F  | -1.106867 | -1.059922 | 2.060757  |
| C  | 3.331565  | 1.012591  | -0.284542 |
| S  | 2.417636  | -0.628457 | -0.517684 |
| O  | 3.202300  | -1.366806 | -1.500602 |
| O  | 1.030238  | -0.191796 | -0.987403 |
| O  | 2.262543  | -1.190581 | 0.853933  |
| F  | 2.663473  | 1.799106  | 0.579268  |
| F  | 3.440397  | 1.649432  | -1.465440 |
| F  | 4.564585  | 0.774543  | 0.201807  |
| C  | -2.303346 | -2.606014 | -0.354113 |
| H  | -1.299048 | -2.765093 | -0.779545 |
| H  | -2.316542 | -3.069419 | 0.643479  |
| H  | -3.029005 | -3.124757 | -0.993912 |
| C  | -1.521231 | 1.956767  | 1.779152  |
| H  | -1.605019 | 1.524325  | 2.787437  |
| H  | -0.448534 | 2.037351  | 1.542941  |
| H  | -1.944597 | 2.969429  | 1.794087  |
| C  | -5.237752 | 1.342180  | -1.625828 |
| H  | -5.780009 | 2.100798  | -1.042795 |
| H  | -4.882973 | 1.832010  | -2.548456 |
| H  | -5.945016 | 0.554609  | -1.921257 |

#### IVa\_Mes

|                                              |                             |
|----------------------------------------------|-----------------------------|
| Zero-point correction=                       | 0.196405 (Hartree/Particle) |
| Thermal correction to Energy=                | 0.218415                    |
| Thermal correction to Enthalpy=              | 0.219359                    |
| Thermal correction to Gibbs Free Energy=     | 0.140888                    |
| Sum of electronic and zero-point Energies=   | -1607.578223                |
| Sum of electronic and thermal Energies=      | -1607.556214                |
| Sum of electronic and thermal Enthalpies=    | -1607.555270                |
| Sum of electronic and thermal Free Energies= | -1607.633741                |

E(RB-P86) = -1607.77462865 A.U

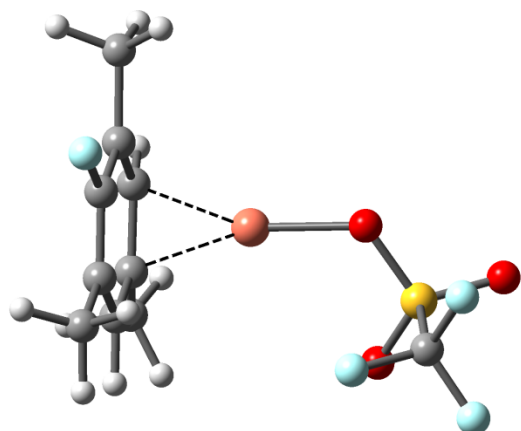

|    |           |           |           |
|----|-----------|-----------|-----------|
| C  | 2.929421  | 0.949131  | -0.380543 |
| C  | 2.427492  | 1.288124  | 0.889357  |
| C  | 2.916311  | -0.334466 | -0.921088 |
| C  | 1.896695  | 0.249786  | 1.660691  |
| C  | 2.390248  | -1.371617 | -0.095758 |
| C  | 1.890608  | -1.100497 | 1.218236  |
| H  | 1.510064  | 0.478733  | 2.657061  |
| H  | 2.509141  | -2.408978 | -0.423920 |
| Cu | 0.380055  | -0.963965 | -0.255126 |
| F  | 3.449087  | 1.956273  | -1.143543 |
| C  | -2.941299 | 1.159237  | -0.011519 |
| S  | -2.596917 | -0.687273 | -0.236948 |
| O  | -3.743835 | -1.185000 | -1.001681 |
| O  | -2.383203 | -1.200255 | 1.123463  |
| O  | -1.325063 | -0.656045 | -1.082175 |
| F  | -1.912320 | 1.760879  | 0.623773  |
| F  | -4.060018 | 1.330105  | 0.726024  |
| F  | -3.118262 | 1.760478  | -1.206888 |
| C  | 3.476203  | -0.618874 | -2.289007 |
| H  | 4.558948  | -0.417389 | -2.317006 |
| H  | 3.313006  | -1.668382 | -2.565999 |
| H  | 3.009732  | 0.021785  | -3.052195 |
| C  | 2.453171  | 2.713568  | 1.371756  |
| H  | 2.031696  | 2.787559  | 2.382538  |
| H  | 3.481231  | 3.107339  | 1.391501  |
| H  | 1.873146  | 3.368277  | 0.702422  |
| C  | 1.577639  | -2.222000 | 2.186116  |
| H  | 2.465772  | -2.429810 | 2.805885  |
| H  | 0.757080  | -1.950378 | 2.864865  |
| H  | 1.310755  | -3.150978 | 1.664060  |

**c. Copper species for reaction of [Mes(Ph)I]<sup>+</sup> with CuF(DMF) (Figure 4 )  
CuF(DMF)**

Zero-point correction= 0.102540 (Hartree/Particle)  
Thermal correction to Energy= 0.112242

Thermal correction to Enthalpy= 0.113186  
 Thermal correction to Gibbs Free Energy= 0.066169  
 Sum of electronic and zero-point Energies= -544.857081  
 Sum of electronic and thermal Energies= -544.847379  
 Sum of electronic and thermal Enthalpies= -544.846435  
 Sum of electronic and thermal Free Energies= -544.893453  
 E(RB-P86) = -544.959621126 A.U.

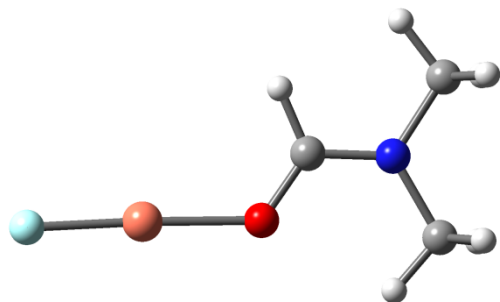

|    |           |           |           |
|----|-----------|-----------|-----------|
| Cu | 1.706463  | 0.047923  | -0.000081 |
| O  | -0.112475 | 0.438997  | -0.000890 |
| F  | 3.486492  | -0.263180 | 0.000652  |
| C  | -1.047374 | -0.419325 | -0.000437 |
| H  | -0.845475 | -1.500953 | -0.000600 |
| N  | -2.335864 | -0.085022 | 0.000023  |
| C  | -3.379131 | -1.111280 | 0.000250  |
| H  | -4.008616 | -1.002426 | 0.895718  |
| H  | -4.008913 | -1.002598 | -0.895028 |
| H  | -2.920131 | -2.107479 | 0.000257  |
| C  | -2.770664 | 1.313157  | 0.000448  |
| H  | -3.379206 | 1.507990  | 0.895797  |
| H  | -3.379295 | 1.508550  | -0.894742 |
| H  | -1.890348 | 1.963635  | 0.000472  |

### la\_DMF

Zero-point correction= 0.357818 (Hartree/Particle)  
 Thermal correction to Energy= 0.386701  
 Thermal correction to Enthalpy= 0.387645  
 Thermal correction to Gibbs Free Energy= 0.290776  
 Sum of electronic and zero-point Energies= -1137.200629  
 Sum of electronic and thermal Energies= -1137.171746  
 Sum of electronic and thermal Enthalpies= -1137.170802  
 Sum of electronic and thermal Free Energies= -1137.267671  
 E(RB-P86) = -1137.55844697 A.U.

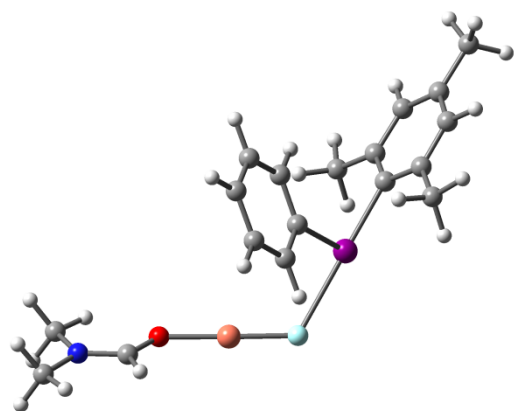

|    |           |           |           |
|----|-----------|-----------|-----------|
| C  | -3.028540 | -0.424926 | 0.001567  |
| C  | -3.372174 | -1.236239 | 1.102285  |
| C  | -3.918502 | 0.495883  | -0.591553 |
| C  | -4.669995 | -1.085520 | 1.617667  |
| C  | -5.196235 | 0.598658  | -0.022832 |
| C  | -5.592189 | -0.180446 | 1.074920  |
| H  | -4.961745 | -1.698957 | 2.474873  |
| H  | -5.901410 | 1.312889  | -0.457742 |
| I  | -1.080579 | -0.664491 | -0.852607 |
| C  | -0.282316 | 1.199702  | -0.140840 |
| C  | 0.605819  | 1.889458  | -0.964811 |
| C  | -0.681006 | 1.659951  | 1.111599  |
| C  | 1.116331  | 3.107923  | -0.495583 |
| H  | 0.898076  | 1.493868  | -1.937465 |
| C  | -0.158491 | 2.882212  | 1.556013  |
| H  | -1.384425 | 1.103473  | 1.732705  |
| C  | 0.737441  | 3.601489  | 0.757542  |
| H  | 1.809480  | 3.670132  | -1.124950 |
| H  | -0.455890 | 3.261997  | 2.535750  |
| H  | 1.138873  | 4.552955  | 1.112247  |
| Cu | 2.741608  | -0.875161 | -0.822270 |
| F  | 1.265345  | -0.939064 | -1.906264 |
| C  | 5.241861  | -0.140592 | 0.163468  |
| H  | 5.345999  | 0.548131  | -0.687743 |
| O  | 4.211174  | -0.867735 | 0.317756  |
| N  | 6.267720  | -0.154038 | 1.009312  |
| C  | 6.282654  | -1.015644 | 2.193232  |
| H  | 6.370480  | -0.394910 | 3.096985  |
| H  | 5.354822  | -1.595134 | 2.228711  |
| H  | 7.146097  | -1.694918 | 2.140910  |
| C  | 7.436641  | 0.698525  | 0.785208  |
| H  | 7.567253  | 1.381985  | 1.636921  |
| H  | 8.336932  | 0.074821  | 0.684798  |
| H  | 7.297770  | 1.284591  | -0.131445 |
| C  | -3.553528 | 1.358938  | -1.773534 |
| H  | -2.723773 | 2.043722  | -1.535114 |
| H  | -3.238479 | 0.751279  | -2.636780 |
| H  | -4.413172 | 1.967837  | -2.082857 |

|   |           |           |          |
|---|-----------|-----------|----------|
| C | -2.436046 | -2.240149 | 1.733783 |
| H | -2.164798 | -3.043118 | 1.030167 |
| H | -1.498570 | -1.773239 | 2.074041 |
| H | -2.913849 | -2.708234 | 2.604636 |
| C | -6.986287 | -0.062601 | 1.639768 |
| H | -7.698407 | -0.652654 | 1.038577 |
| H | -7.034416 | -0.436691 | 2.671987 |
| H | -7.336964 | 0.979863  | 1.626566 |

### TS\_IIa\_DMF

|                                              |                             |
|----------------------------------------------|-----------------------------|
| Zero-point correction=                       | 0.356193 (Hartree/Particle) |
| Thermal correction to Energy=                | 0.384640                    |
| Thermal correction to Enthalpy=              | 0.385584                    |
| Thermal correction to Gibbs Free Energy=     | 0.291548                    |
| Sum of electronic and zero-point Energies=   | -1137.182877                |
| Sum of electronic and thermal Energies=      | -1137.154430                |
| Sum of electronic and thermal Enthalpies=    | -1137.153486                |
| Sum of electronic and thermal Free Energies= | -1137.247522                |
| E(RB-P86) =                                  | -1137.53907002 A.U.         |

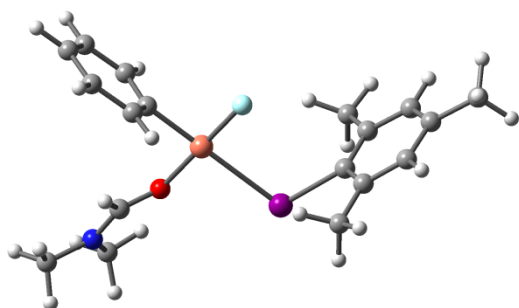

|    |           |           |           |
|----|-----------|-----------|-----------|
| C  | 2.371760  | 0.285433  | -0.350976 |
| C  | 2.334280  | 1.658124  | -0.691610 |
| C  | 3.301164  | -0.255857 | 0.567900  |
| C  | 3.288323  | 2.488657  | -0.088648 |
| C  | 4.227342  | 0.631944  | 1.131183  |
| C  | 4.243594  | 2.000148  | 0.816561  |
| H  | 3.281666  | 3.553533  | -0.338256 |
| H  | 4.958772  | 0.237448  | 1.842236  |
| I  | 0.990865  | -1.019165 | -1.275638 |
| C  | -1.049476 | -1.258909 | 0.783204  |
| C  | -1.283450 | -2.594348 | 1.089814  |
| C  | -0.737179 | -0.273413 | 1.710439  |
| C  | -1.336885 | -2.926264 | 2.455125  |
| H  | -1.453705 | -3.342106 | 0.315843  |
| C  | -0.795514 | -0.640114 | 3.066592  |
| H  | -0.476431 | 0.746411  | 1.424311  |
| C  | -1.092229 | -1.956811 | 3.433188  |
| H  | -1.559346 | -3.959080 | 2.733675  |
| H  | -0.589713 | 0.119995  | 3.823808  |
| H  | -1.112534 | -2.233800 | 4.489279  |
| Cu | -1.833731 | -0.750362 | -0.933743 |

|   |           |           |           |
|---|-----------|-----------|-----------|
| F | -1.621167 | -2.288516 | -1.975368 |
| C | -3.475823 | 1.235873  | 0.322422  |
| H | -3.593975 | 0.558101  | 1.181453  |
| O | -2.712955 | 0.938499  | -0.651399 |
| N | -4.164461 | 2.365796  | 0.384773  |
| C | -4.106834 | 3.367614  | -0.683575 |
| H | -3.799374 | 4.332588  | -0.256115 |
| H | -3.386615 | 3.047669  | -1.442849 |
| H | -5.102906 | 3.477193  | -1.136471 |
| C | -5.037858 | 2.654151  | 1.525722  |
| H | -4.708499 | 3.581701  | 2.015404  |
| H | -6.072232 | 2.780378  | 1.174878  |
| H | -4.995678 | 1.826867  | 2.244141  |
| C | 3.333674  | -1.713370 | 0.952122  |
| H | 2.377480  | -2.036169 | 1.393242  |
| H | 3.522166  | -2.357620 | 0.078470  |
| H | 4.127945  | -1.897280 | 1.687766  |
| C | 1.338337  | 2.245366  | -1.659199 |
| H | 1.450787  | 1.811646  | -2.665752 |
| H | 0.302001  | 2.054629  | -1.339584 |
| H | 1.477178  | 3.331642  | -1.739041 |
| C | 5.275825  | 2.918231  | 1.418938  |
| H | 6.176448  | 2.954775  | 0.782157  |
| H | 4.896965  | 3.946539  | 1.507096  |
| H | 5.593004  | 2.570520  | 2.412556  |

### IIIa\_DMF

|                                              |                             |
|----------------------------------------------|-----------------------------|
| Zero-point correction=                       | 0.357590 (Hartree/Particle) |
| Thermal correction to Energy=                | 0.386267                    |
| Thermal correction to Enthalpy=              | 0.387211                    |
| Thermal correction to Gibbs Free Energy=     | 0.291981                    |
| Sum of electronic and zero-point Energies=   | -1137.195386                |
| Sum of electronic and thermal Energies=      | -1137.166709                |
| Sum of electronic and thermal Enthalpies=    | -1137.165765                |
| Sum of electronic and thermal Free Energies= | -1137.260995                |
| E(RB-P86) =                                  | -1137.55297617 A.U.         |

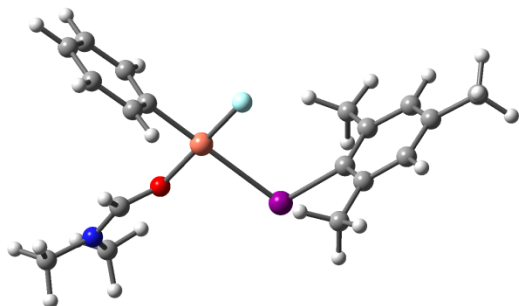

|   |          |           |           |
|---|----------|-----------|-----------|
| C | 2.811902 | -0.383868 | 0.014747  |
| C | 3.405706 | 0.005563  | -1.201833 |
| C | 3.361126 | -0.082884 | 1.276579  |
| C | 4.609725 | 0.723589  | -1.117652 |

|    |           |           |           |
|----|-----------|-----------|-----------|
| C  | 4.566548  | 0.637469  | 1.287059  |
| C  | 5.208176  | 1.044646  | 0.108770  |
| H  | 5.089110  | 1.040743  | -2.048397 |
| H  | 5.012029  | 0.886448  | 2.254758  |
| I  | 1.014292  | -1.521873 | -0.059687 |
| C  | -2.360699 | 1.773303  | -0.077245 |
| C  | -2.663958 | 2.359666  | 1.137341  |
| C  | -2.950043 | 2.076515  | -1.290281 |
| C  | -3.700996 | 3.313468  | 1.132584  |
| H  | -2.137910 | 2.118573  | 2.062568  |
| C  | -3.977712 | 3.040069  | -1.263608 |
| H  | -2.665197 | 1.598276  | -2.228795 |
| C  | -4.346928 | 3.648969  | -0.060593 |
| H  | -3.975515 | 3.794559  | 2.074306  |
| H  | -4.479107 | 3.297310  | -2.199641 |
| H  | -5.141410 | 4.398323  | -0.054363 |
| Cu | -0.982045 | 0.418688  | -0.082713 |
| F  | 0.197238  | 1.760083  | 0.032411  |
| C  | -3.268147 | -1.162806 | 0.372290  |
| H  | -3.584483 | -0.433049 | 1.128225  |
| O  | -2.185996 | -1.004821 | -0.298441 |
| N  | -4.057858 | -2.203302 | 0.194332  |
| C  | -3.759776 | -3.252737 | -0.787079 |
| H  | -4.610342 | -3.348823 | -1.476182 |
| H  | -2.855413 | -2.987836 | -1.342948 |
| H  | -3.611198 | -4.207541 | -0.262921 |
| C  | -5.278588 | -2.361524 | 0.993185  |
| H  | -6.147821 | -2.407324 | 0.322414  |
| H  | -5.218303 | -3.293975 | 1.571812  |
| H  | -5.388226 | -1.512492 | 1.677608  |
| C  | 2.723680  | -0.491166 | 2.580715  |
| H  | 1.704696  | -0.083906 | 2.676184  |
| H  | 2.643258  | -1.586662 | 2.666404  |
| H  | 3.318822  | -0.126152 | 3.428526  |
| C  | 2.816652  | -0.307998 | -2.554093 |
| H  | 2.735299  | -1.394489 | -2.718209 |
| H  | 1.803579  | 0.111478  | -2.659712 |
| H  | 3.444807  | 0.110611  | -3.351860 |
| C  | 6.519186  | 1.791131  | 0.159132  |
| H  | 6.594870  | 2.408343  | 1.066071  |
| H  | 7.368107  | 1.086517  | 0.170593  |
| H  | 6.644903  | 2.440916  | -0.718929 |

### TS\_IIIa\_DMF

|                                            |                             |
|--------------------------------------------|-----------------------------|
| Zero-point correction=                     | 0.356464 (Hartree/Particle) |
| Thermal correction to Energy=              | 0.384788                    |
| Thermal correction to Enthalpy=            | 0.385733                    |
| Thermal correction to Gibbs Free Energy=   | 0.290373                    |
| Sum of electronic and zero-point Energies= | -1137.189188                |
| Sum of electronic and thermal Energies=    | -1137.160864                |
| Sum of electronic and thermal Enthalpies=  | -1137.159920                |

Sum of electronic and thermal Free Energies= -1137.255279  
E(RB-P86) = -1137.54565243 A.U.

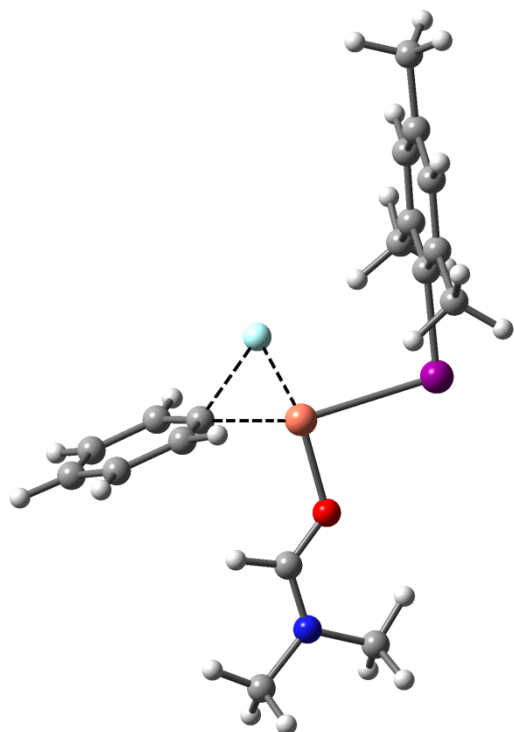

|    |           |           |           |
|----|-----------|-----------|-----------|
| C  | -1.867717 | 1.981685  | -0.053152 |
| C  | -2.332691 | 2.418677  | -1.282422 |
| C  | -2.304017 | 2.418908  | 1.186708  |
| C  | -3.455932 | 3.263016  | -1.249616 |
| H  | -1.884421 | 2.108882  | -2.226965 |
| C  | -3.427677 | 3.264366  | 1.180475  |
| H  | -1.831513 | 2.111623  | 2.120314  |
| C  | -3.993335 | 3.686245  | -0.028131 |
| H  | -3.886120 | 3.598353  | -2.195892 |
| H  | -3.833377 | 3.602401  | 2.136540  |
| H  | -4.847721 | 4.365617  | -0.018527 |
| Cu | -0.936734 | 0.230290  | -0.068735 |
| F  | 0.069757  | 1.798959  | -0.072287 |
| C  | -3.521750 | -0.915987 | 0.132904  |
| H  | -3.897643 | 0.097582  | 0.339098  |
| O  | -2.284582 | -1.130275 | -0.085340 |
| N  | -4.430629 | -1.877946 | 0.130273  |
| C  | -5.842154 | -1.581550 | 0.391942  |
| H  | -6.447569 | -1.883542 | -0.474566 |
| H  | -6.176442 | -2.140906 | 1.277416  |
| H  | -5.970351 | -0.507408 | 0.569900  |
| C  | -4.080320 | -3.277334 | -0.130770 |
| H  | -4.630757 | -3.628949 | -1.015206 |
| H  | -4.364776 | -3.890188 | 0.736524  |
| H  | -3.003061 | -3.356522 | -0.305896 |
| C  | 3.367391  | -0.052214 | -1.191724 |



|   |          |           |           |
|---|----------|-----------|-----------|
| C | 4.520837 | 0.743810  | -1.087536 |
| C | 5.066196 | 1.117087  | 0.148168  |
| C | 4.431054 | 0.669338  | 1.314387  |
| C | 3.274380 | -0.128146 | 1.282831  |
| C | 2.770674 | -0.466862 | 0.013278  |
| H | 5.004637 | 1.075839  | -2.010979 |
| H | 4.844090 | 0.942109  | 2.290184  |
| I | 1.040345 | -1.717466 | -0.089848 |
| C | 2.644862 | -0.581201 | 2.576170  |
| H | 1.602986 | -0.233350 | 2.661335  |
| H | 2.624532 | -1.680122 | 2.653535  |
| H | 3.207010 | -0.188533 | 3.434204  |
| C | 2.838274 | -0.425294 | -2.553768 |
| H | 2.828584 | -1.517520 | -2.698975 |
| H | 1.804325 | -0.072390 | -2.695420 |
| H | 3.461549 | 0.018264  | -3.341938 |
| C | 6.289799 | 1.999493  | 0.220674  |
| H | 6.879493 | 1.795034  | 1.126127  |
| H | 6.937646 | 1.859916  | -0.656846 |
| H | 6.001915 | 3.064045  | 0.250184  |

#### IVa\_DMF

|                                              |                             |
|----------------------------------------------|-----------------------------|
| Zero-point correction=                       | 0.268494 (Hartree/Particle) |
| Thermal correction to Energy=                | 0.289957                    |
| Thermal correction to Enthalpy=              | 0.290901                    |
| Thermal correction to Gibbs Free Energy=     | 0.212280                    |
| Sum of electronic and zero-point Energies=   | -805.743281                 |
| Sum of electronic and thermal Energies=      | -805.721818                 |
| Sum of electronic and thermal Enthalpies=    | -805.720874                 |
| Sum of electronic and thermal Free Energies= | -805.799494                 |
| E(RB-P86) =                                  | -806.011774845 A.U.         |

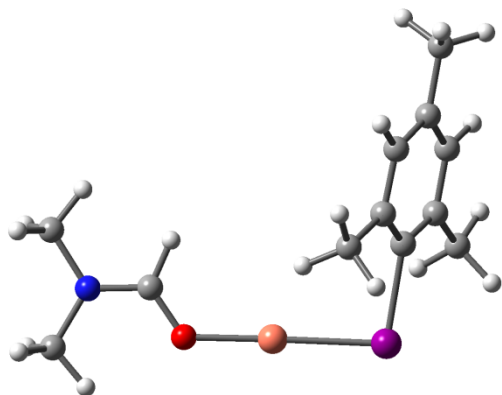

|    |           |           |           |
|----|-----------|-----------|-----------|
| Cu | -1.380811 | -0.935740 | 0.018165  |
| C  | -3.446193 | 0.976336  | -0.221852 |
| H  | -2.677550 | 1.762390  | -0.267239 |
| O  | -3.143755 | -0.253638 | -0.113951 |
| N  | -4.700021 | 1.409616  | -0.288236 |
| C  | -4.995755 | 2.838341  | -0.415999 |

|   |           |           |           |
|---|-----------|-----------|-----------|
| H | -5.556984 | 3.019230  | -1.344254 |
| H | -5.601968 | 3.168738  | 0.439913  |
| H | -4.060252 | 3.410058  | -0.440194 |
| C | -5.840474 | 0.491993  | -0.235604 |
| H | -6.428071 | 0.584960  | -1.160520 |
| H | -6.478319 | 0.752886  | 0.621396  |
| H | -5.474046 | -0.533789 | -0.128867 |
| C | 2.714934  | 0.250256  | -1.077760 |
| C | 3.438920  | 1.454283  | -1.105679 |
| C | 3.396927  | 2.380190  | -0.054153 |
| C | 2.607044  | 2.079830  | 1.063105  |
| C | 1.862278  | 0.891347  | 1.162603  |
| C | 1.939700  | 0.011280  | 0.070082  |
| H | 4.056467  | 1.663731  | -1.984060 |
| H | 2.567214  | 2.784355  | 1.898975  |
| I | 0.860019  | -1.849247 | 0.179231  |
| C | 1.033516  | 0.629407  | 2.393584  |
| H | -0.040189 | 0.559228  | 2.148610  |
| H | 1.315481  | -0.317632 | 2.880116  |
| H | 1.160988  | 1.440695  | 3.122623  |
| C | 2.809284  | -0.707361 | -2.239266 |
| H | 3.239414  | -1.674665 | -1.933679 |
| H | 1.818619  | -0.914720 | -2.674038 |
| H | 3.447458  | -0.288761 | -3.028905 |
| C | 4.168291  | 3.675905  | -0.133475 |
| H | 4.382432  | 4.076801  | 0.867460  |
| H | 5.120263  | 3.543256  | -0.667944 |
| H | 3.590936  | 4.440757  | -0.679706 |

**[Cu(DMF)<sub>2</sub>]<sup>+</sup>**

|                                              |                             |
|----------------------------------------------|-----------------------------|
| Zero-point correction=                       | 0.202354 (Hartree/Particle) |
| Thermal correction to Energy=                | 0.218117                    |
| Thermal correction to Enthalpy=              | 0.219062                    |
| Thermal correction to Gibbs Free Energy=     | 0.155855                    |
| Sum of electronic and zero-point Energies=   | -693.309584                 |
| Sum of electronic and thermal Energies=      | -693.293821                 |
| Sum of electronic and thermal Enthalpies=    | -693.292877                 |
| Sum of electronic and thermal Free Energies= | -693.356084                 |
| E(RB-P86) =                                  | -693.511938307 A.U.         |

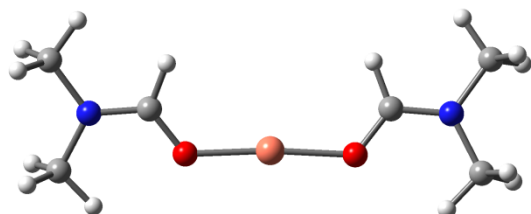

|    |          |           |           |
|----|----------|-----------|-----------|
| Cu | 0.000008 | -0.478439 | -0.001253 |
| O  | 1.857967 | -0.558594 | 0.079633  |
| C  | 2.634575 | 0.434848  | -0.084100 |

|   |           |           |           |
|---|-----------|-----------|-----------|
| H | 2.251074  | 1.444459  | -0.291588 |
| N | 3.957578  | 0.333622  | -0.017529 |
| C | 4.812055  | 1.506995  | -0.211144 |
| H | 5.418129  | 1.677322  | 0.690647  |
| H | 5.482244  | 1.340817  | -1.067089 |
| H | 4.191670  | 2.390885  | -0.402973 |
| C | 4.623657  | -0.943447 | 0.248950  |
| H | 5.222862  | -0.858823 | 1.167266  |
| H | 5.289243  | -1.190150 | -0.591036 |
| H | 3.868631  | -1.726729 | 0.368274  |
| C | -2.634437 | 0.435307  | 0.082535  |
| H | -2.250725 | 1.445275  | 0.287904  |
| O | -1.857947 | -0.558102 | -0.081822 |
| N | -3.957554 | 0.333676  | 0.018955  |
| C | -4.811911 | 1.507152  | 0.212585  |
| H | -4.191328 | 2.391514  | 0.401552  |
| H | -5.420081 | 1.675817  | -0.688103 |
| H | -5.480090 | 1.342154  | 1.070324  |
| C | -4.623974 | -0.943860 | -0.244338 |
| H | -3.869196 | -1.727724 | -0.361390 |
| H | -5.222969 | -0.861527 | -1.163004 |
| H | -5.289816 | -1.188035 | 0.596175  |

**d. Copper species for reaction of [Mes(Ph)I]<sup>+</sup> with [CuF<sub>2</sub>]<sup>-</sup> (Figure 5)**

[CuF<sub>2</sub>]<sup>-</sup>

|                                              |                             |
|----------------------------------------------|-----------------------------|
| Zero-point correction=                       | 0.003151 (Hartree/Particle) |
| Thermal correction to Energy=                | 0.007131                    |
| Thermal correction to Enthalpy=              | 0.008075                    |
| Thermal correction to Gibbs Free Energy=     | -0.021498                   |
| Sum of electronic and zero-point Energies=   | -396.399343                 |
| Sum of electronic and thermal Energies=      | -396.395363                 |
| Sum of electronic and thermal Enthalpies=    | -396.394419                 |
| Sum of electronic and thermal Free Energies= | -396.423992                 |
| E(RB-P86) =                                  | -396.402493821 A.U          |

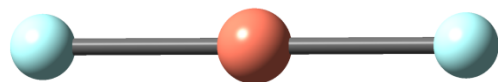

|    |          |          |           |
|----|----------|----------|-----------|
| Cu | 0.000000 | 0.000000 | 0.000000  |
| F  | 0.000000 | 0.000000 | -1.817269 |
| F  | 0.000000 | 0.000000 | 1.817270  |

**la\_F**

|                                              |                             |
|----------------------------------------------|-----------------------------|
| Zero-point correction=                       | 0.257944 (Hartree/Particle) |
| Thermal correction to Energy=                | 0.280885                    |
| Thermal correction to Enthalpy=              | 0.281829                    |
| Thermal correction to Gibbs Free Energy=     | 0.199641                    |
| Sum of electronic and zero-point Energies=   | -988.745245                 |
| Sum of electronic and thermal Energies=      | -988.722304                 |
| Sum of electronic and thermal Enthalpies=    | -988.721359                 |
| Sum of electronic and thermal Free Energies= | -988.803548                 |
| E(RB-P86) =                                  | -989.003188677 A.U.         |

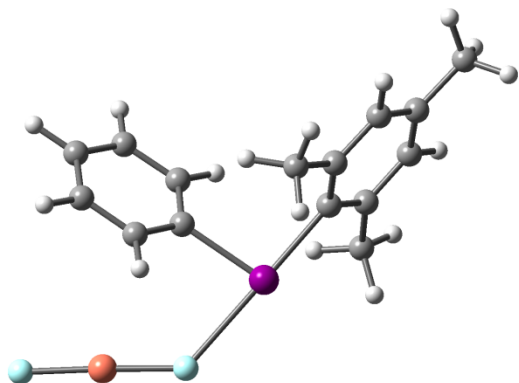

|    |           |           |           |
|----|-----------|-----------|-----------|
| C  | -2.154821 | -0.383953 | -0.130490 |
| C  | -2.889170 | -0.933911 | 0.940776  |
| C  | -2.720544 | 0.479406  | -1.092096 |
| C  | -4.241543 | -0.568132 | 1.036656  |
| C  | -4.075403 | 0.808109  | -0.932732 |
| C  | -4.851221 | 0.297854  | 0.118140  |
| H  | -4.831885 | -0.977462 | 1.861636  |
| H  | -4.534310 | 1.484862  | -1.659459 |
| I  | -0.099445 | -0.967136 | -0.338019 |
| C  | 0.742170  | 0.944982  | 0.133250  |
| C  | 1.738387  | 1.443147  | -0.706991 |
| C  | 0.281222  | 1.625115  | 1.258425  |
| C  | 2.288337  | 2.694875  | -0.397938 |
| H  | 2.070771  | 0.891158  | -1.586323 |
| C  | 0.848055  | 2.873981  | 1.547250  |
| H  | -0.499624 | 1.211929  | 1.898140  |
| C  | 1.847452  | 3.404998  | 0.723593  |
| H  | 3.063776  | 3.108704  | -1.045789 |
| H  | 0.504391  | 3.423624  | 2.425975  |
| H  | 2.283047  | 4.378747  | 0.956545  |
| Cu | 3.861282  | -0.769917 | 0.017272  |
| F  | 5.380696  | 0.044940  | 0.578493  |
| F  | 2.348980  | -1.641401 | -0.572103 |
| C  | -1.944466 | 1.056793  | -2.249362 |
| H  | -1.136878 | 1.722627  | -1.905622 |
| H  | -1.478245 | 0.266854  | -2.859539 |
| H  | -2.606737 | 1.642237  | -2.900786 |
| C  | -2.308875 | -1.888145 | 1.959363  |
| H  | -1.991419 | -2.835536 | 1.495018  |
| H  | -1.430544 | -1.465974 | 2.471673  |
| H  | -3.060585 | -2.128092 | 2.722959  |
| C  | -6.313637 | 0.649633  | 0.239981  |
| H  | -6.931154 | -0.054156 | -0.343391 |
| H  | -6.653543 | 0.596621  | 1.284150  |
| H  | -6.516390 | 1.659281  | -0.145512 |

**TS\_la\_F**

Zero-point correction=

0.256903 (Hartree/Particle)

Thermal correction to Energy= 0.279093  
 Thermal correction to Enthalpy= 0.280037  
 Thermal correction to Gibbs Free Energy= 0.202143  
 Sum of electronic and zero-point Energies= -988.739795  
 Sum of electronic and thermal Energies= -988.717605  
 Sum of electronic and thermal Enthalpies= -988.716661  
 Sum of electronic and thermal Free Energies= -988.794555  
 E(RB-P86) = -988.996698023 A.U

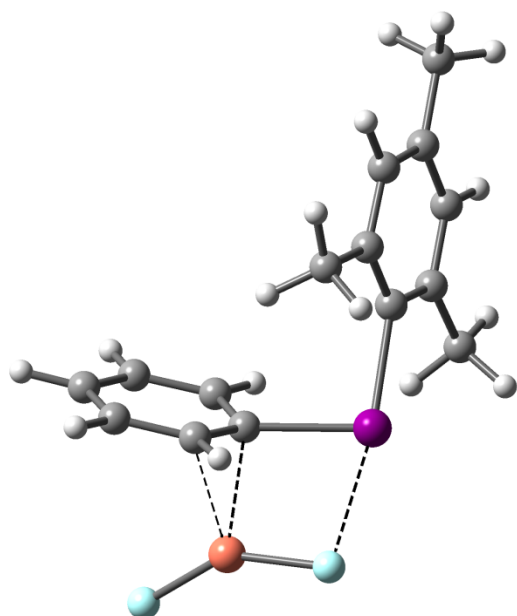

|    |           |           |           |
|----|-----------|-----------|-----------|
| C  | -1.960207 | -0.349798 | -0.138870 |
| C  | -2.674797 | -0.834748 | 0.977710  |
| C  | -2.493381 | 0.599501  | -1.036309 |
| C  | -3.961308 | -0.314470 | 1.187461  |
| C  | -3.782633 | 1.083397  | -0.765127 |
| C  | -4.529389 | 0.645675  | 0.337781  |
| H  | -4.535538 | -0.680097 | 2.043855  |
| H  | -4.214944 | 1.822188  | -1.446317 |
| I  | -0.026688 | -1.196843 | -0.531238 |
| C  | 1.120372  | 0.578665  | -0.009510 |
| C  | 1.797240  | 1.261152  | -1.047926 |
| C  | 0.848873  | 1.192669  | 1.227291  |
| C  | 2.266587  | 2.557518  | -0.796673 |
| H  | 1.926660  | 0.801229  | -2.028534 |
| C  | 1.332023  | 2.488997  | 1.444797  |
| H  | 0.285119  | 0.675963  | 2.004591  |
| C  | 2.031879  | 3.170003  | 0.441253  |
| H  | 2.803579  | 3.088484  | -1.585383 |
| H  | 1.147138  | 2.967268  | 2.408994  |
| H  | 2.387779  | 4.186198  | 0.620994  |
| Cu | 3.055768  | -0.390076 | 0.270569  |
| F  | 4.454070  | 0.244048  | 1.336117  |

|   |           |           |           |
|---|-----------|-----------|-----------|
| F | 2.349231  | -1.850954 | -0.818433 |
| C | -1.748170 | 1.106120  | -2.245923 |
| H | -0.832110 | 1.647336  | -1.960787 |
| H | -1.446503 | 0.282294  | -2.912369 |
| H | -2.377714 | 1.795901  | -2.823678 |
| C | -2.140987 | -1.883932 | 1.926334  |
| H | -1.973155 | -2.846315 | 1.416712  |
| H | -1.182414 | -1.585721 | 2.378558  |
| H | -2.857665 | -2.057984 | 2.739950  |
| C | -5.903201 | 1.204908  | 0.615384  |
| H | -5.840265 | 2.060270  | 1.309236  |
| H | -6.385067 | 1.563215  | -0.305490 |
| H | -6.554799 | 0.452833  | 1.083591  |

### Ila\_F

|                                              |                             |
|----------------------------------------------|-----------------------------|
| Zero-point correction=                       | 0.257616 (Hartree/Particle) |
| Thermal correction to Energy=                | 0.280201                    |
| Thermal correction to Enthalpy=              | 0.281145                    |
| Thermal correction to Gibbs Free Energy=     | 0.203000                    |
| Sum of electronic and zero-point Energies=   | -988.741531                 |
| Sum of electronic and thermal Energies=      | -988.718946                 |
| Sum of electronic and thermal Enthalpies=    | -988.718001                 |
| Sum of electronic and thermal Free Energies= | -988.796147                 |
| E(RB-P86) =                                  | -988.999146789 A.U          |

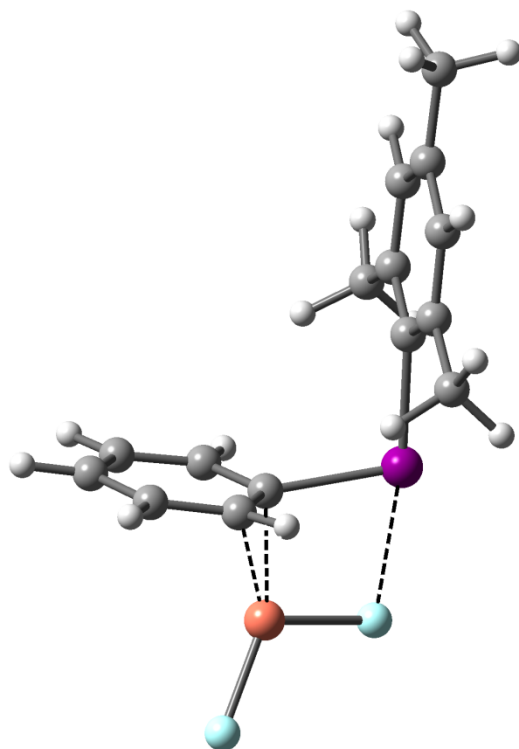

|   |           |           |           |
|---|-----------|-----------|-----------|
| C | -1.960672 | -0.364001 | -0.000841 |
| C | -2.695712 | -0.027304 | 1.155207  |
| C | -2.489982 | -0.240197 | -1.304792 |

|    |           |           |           |
|----|-----------|-----------|-----------|
| C  | -3.996460 | 0.468579  | 0.967044  |
| C  | -3.795244 | 0.260053  | -1.421793 |
| C  | -4.563507 | 0.620432  | -0.304892 |
| H  | -4.581513 | 0.740256  | 1.850550  |
| H  | -4.222426 | 0.367300  | -2.423317 |
| I  | -0.011816 | -1.249557 | 0.237801  |
| C  | 1.162738  | 0.582838  | 0.201973  |
| C  | 1.489714  | 1.193793  | -1.048545 |
| C  | 1.276590  | 1.313029  | 1.415396  |
| C  | 1.889025  | 2.551871  | -1.053385 |
| H  | 1.291857  | 0.684439  | -1.993725 |
| C  | 1.695025  | 2.639968  | 1.366075  |
| H  | 1.053875  | 0.838222  | 2.371211  |
| C  | 1.978461  | 3.266564  | 0.136250  |
| H  | 2.109520  | 3.029990  | -2.009911 |
| H  | 1.795558  | 3.197154  | 2.299947  |
| H  | 2.276165  | 4.316538  | 0.119832  |
| Cu | 2.957454  | -0.157356 | -0.230102 |
| F  | 4.760669  | -0.159038 | -0.768960 |
| F  | 2.364968  | -1.968852 | 0.488897  |
| C  | -1.733224 | -0.611162 | -2.558493 |
| H  | -0.851114 | 0.030463  | -2.706802 |
| H  | -1.381339 | -1.653941 | -2.535172 |
| H  | -2.378201 | -0.493223 | -3.439394 |
| C  | -2.162720 | -0.169250 | 2.561303  |
| H  | -1.835250 | -1.198269 | 2.775856  |
| H  | -1.301820 | 0.493573  | 2.738447  |
| H  | -2.939868 | 0.095881  | 3.290467  |
| C  | -5.972440 | 1.133568  | -0.473560 |
| H  | -6.662836 | 0.304963  | -0.704086 |
| H  | -6.333906 | 1.624801  | 0.440568  |
| H  | -6.038881 | 1.850037  | -1.306093 |

### TS\_Ila\_F

|                                              |                             |
|----------------------------------------------|-----------------------------|
| Zero-point correction=                       | 0.256519 (Hartree/Particle) |
| Thermal correction to Energy=                | 0.278919                    |
| Thermal correction to Enthalpy=              | 0.279863                    |
| Thermal correction to Gibbs Free Energy=     | 0.201081                    |
| Sum of electronic and zero-point Energies=   | -988.733467                 |
| Sum of electronic and thermal Energies=      | -988.711067                 |
| Sum of electronic and thermal Enthalpies=    | -988.710123                 |
| Sum of electronic and thermal Free Energies= | -988.788905                 |
| E(RB-P86) =                                  | -1137.53907002 A.U.         |

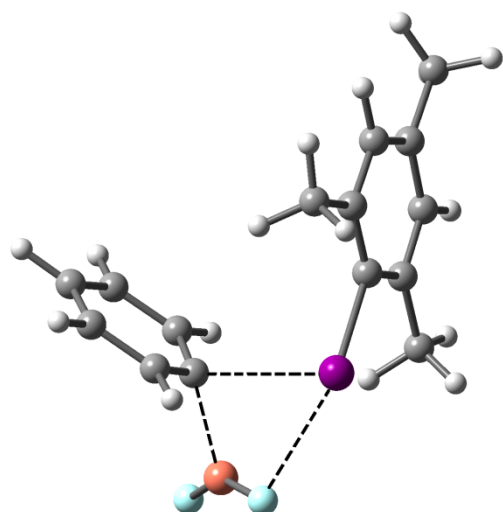

|    |           |           |           |
|----|-----------|-----------|-----------|
| C  | 2.371760  | 0.285433  | -0.350976 |
| C  | 2.334280  | 1.658124  | -0.691610 |
| C  | 3.301164  | -0.255857 | 0.567900  |
| C  | 3.288323  | 2.488657  | -0.088648 |
| C  | 4.227342  | 0.631944  | 1.131183  |
| C  | 4.243594  | 2.000148  | 0.816561  |
| H  | 3.281666  | 3.553533  | -0.338256 |
| H  | 4.958772  | 0.237448  | 1.842236  |
| I  | 0.990865  | -1.019165 | -1.275638 |
| C  | -1.049476 | -1.258909 | 0.783204  |
| C  | -1.283450 | -2.594348 | 1.089814  |
| C  | -0.737179 | -0.273413 | 1.710439  |
| C  | -1.336885 | -2.926264 | 2.455125  |
| H  | -1.453705 | -3.342106 | 0.315843  |
| C  | -0.795514 | -0.640114 | 3.066592  |
| H  | -0.476431 | 0.746411  | 1.424311  |
| C  | -1.092229 | -1.956811 | 3.433188  |
| H  | -1.559346 | -3.959080 | 2.733675  |
| H  | -0.589713 | 0.119995  | 3.823808  |
| H  | -1.112534 | -2.233800 | 4.489279  |
| Cu | -1.833731 | -0.750362 | -0.933743 |
| F  | -1.621167 | -2.288516 | -1.975368 |
| C  | -3.475823 | 1.235873  | 0.322422  |
| H  | -3.593975 | 0.558101  | 1.181453  |
| O  | -2.712955 | 0.938499  | -0.651399 |
| N  | -4.164461 | 2.365796  | 0.384773  |
| C  | -4.106834 | 3.367614  | -0.683575 |
| H  | -3.799374 | 4.332588  | -0.256115 |
| H  | -3.386615 | 3.047669  | -1.442849 |
| H  | -5.102906 | 3.477193  | -1.136471 |
| C  | -5.037858 | 2.654151  | 1.525722  |
| H  | -4.708499 | 3.581701  | 2.015404  |
| H  | -6.072232 | 2.780378  | 1.174878  |
| H  | -4.995678 | 1.826867  | 2.244141  |



|   |          |           |           |
|---|----------|-----------|-----------|
| C | 3.333674 | -1.713370 | 0.952122  |
| H | 2.377480 | -2.036169 | 1.393242  |
| H | 3.522166 | -2.357620 | 0.078470  |
| H | 4.127945 | -1.897280 | 1.687766  |
| C | 1.338337 | 2.245366  | -1.659199 |
| H | 1.450787 | 1.811646  | -2.665752 |
| H | 0.302001 | 2.054629  | -1.339584 |
| H | 1.477178 | 3.331642  | -1.739041 |
| C | 5.275825 | 2.918231  | 1.418938  |
| H | 6.176448 | 2.954775  | 0.782157  |
| H | 4.896965 | 3.946539  | 1.507096  |
| H | 5.593004 | 2.570520  | 2.412556  |

### IIIa\_F

|                                              |                             |
|----------------------------------------------|-----------------------------|
| Zero-point correction=                       | 0.257738 (Hartree/Particle) |
| Thermal correction to Energy=                | 0.280395                    |
| Thermal correction to Enthalpy=              | 0.281339                    |
| Thermal correction to Gibbs Free Energy=     | 0.200785                    |
| Sum of electronic and zero-point Energies=   | -988.752476                 |
| Sum of electronic and thermal Energies=      | -988.729819                 |
| Sum of electronic and thermal Enthalpies=    | -988.728875                 |
| Sum of electronic and thermal Free Energies= | -988.809430                 |
| E(RB-P86) =                                  | -989.010214250 A.U          |

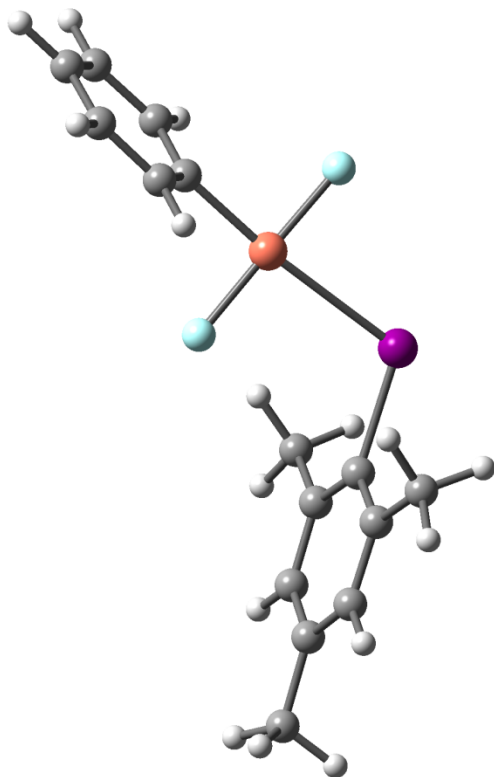

|   |           |           |           |
|---|-----------|-----------|-----------|
| C | -2.381309 | -0.167025 | -0.019138 |
| C | -2.969604 | 0.263167  | 1.187153  |

|    |           |           |           |
|----|-----------|-----------|-----------|
| C  | -2.790153 | 0.298662  | -1.283458 |
| C  | -4.014039 | 1.196168  | 1.089254  |
| C  | -3.840766 | 1.231847  | -1.309784 |
| C  | -4.467467 | 1.688876  | -0.143111 |
| H  | -4.483862 | 1.545887  | 2.013490  |
| H  | -4.172646 | 1.610121  | -2.281252 |
| I  | -0.810300 | -1.603140 | 0.073041  |
| C  | 3.374468  | 0.544531  | 0.011351  |
| C  | 3.756162  | 1.315115  | 1.094522  |
| C  | 4.157687  | 0.282062  | -1.097999 |
| C  | 5.052483  | 1.863832  | 1.056544  |
| H  | 3.097699  | 1.509663  | 1.941960  |
| C  | 5.444442  | 0.854268  | -1.114902 |
| H  | 3.819523  | -0.343260 | -1.925190 |
| C  | 5.885879  | 1.635631  | -0.042758 |
| H  | 5.389067  | 2.476999  | 1.896078  |
| H  | 6.091531  | 0.668637  | -1.975658 |
| H  | 6.887316  | 2.071165  | -0.064503 |
| Cu | 1.619553  | -0.235187 | 0.045122  |
| F  | 0.895720  | 1.401779  | -0.001038 |
| F  | 2.321093  | -1.891434 | 0.090753  |
| C  | -2.532522 | -0.227689 | 2.544667  |
| H  | -2.646240 | -1.319873 | 2.634823  |
| H  | -1.472259 | 0.002143  | 2.735509  |
| H  | -3.132322 | 0.244588  | 3.334455  |
| C  | -2.162410 | -0.153727 | -2.578124 |
| H  | -1.082082 | 0.060818  | -2.599874 |
| H  | -2.278191 | -1.239703 | -2.724988 |
| H  | -2.630549 | 0.357272  | -3.430376 |
| C  | -5.612671 | 2.670934  | -0.207440 |
| H  | -6.579401 | 2.152483  | -0.091336 |
| H  | -5.546857 | 3.416220  | 0.599394  |
| H  | -5.634271 | 3.200680  | -1.170341 |

### TS\_IIIa\_F

|                                              |                             |
|----------------------------------------------|-----------------------------|
| Zero-point correction=                       | 0.256486 (Hartree/Particle) |
| Thermal correction to Energy=                | 0.278863                    |
| Thermal correction to Enthalpy=              | 0.279808                    |
| Thermal correction to Gibbs Free Energy=     | 0.198771                    |
| Sum of electronic and zero-point Energies=   | -988.739745                 |
| Sum of electronic and thermal Energies=      | -988.717368                 |
| Sum of electronic and thermal Enthalpies=    | -988.716424                 |
| Sum of electronic and thermal Free Energies= | -988.797460                 |
| E(RB-P86) =                                  | -988.996231096 A.U          |

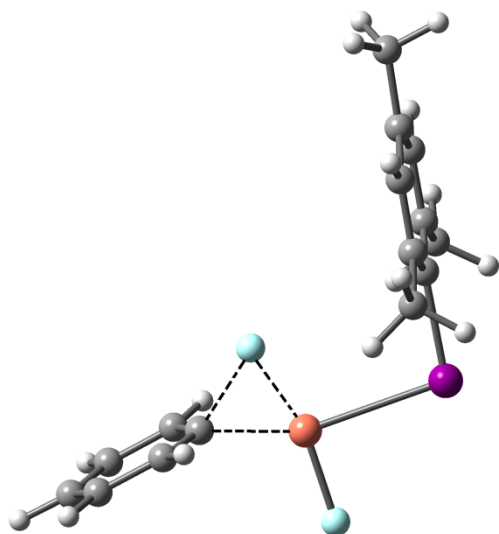

|    |           |           |           |
|----|-----------|-----------|-----------|
| C  | -2.943715 | 0.869391  | -0.000253 |
| C  | -3.519500 | 1.135168  | -1.233277 |
| C  | -3.519175 | 1.135733  | 1.232800  |
| C  | -4.856146 | 1.565310  | -1.214443 |
| H  | -2.984455 | 0.986461  | -2.171638 |
| C  | -4.855829 | 1.565863  | 1.214126  |
| H  | -2.983880 | 0.987465  | 2.171088  |
| C  | -5.518790 | 1.782392  | -0.000121 |
| H  | -5.362855 | 1.744859  | -2.165402 |
| H  | -5.362286 | 1.745843  | 2.165137  |
| H  | -6.550535 | 2.138916  | -0.000068 |
| Cu | -1.574725 | -0.573208 | -0.000066 |
| F  | -1.111580 | 1.248465  | -0.000566 |
| F  | -2.470794 | -2.172652 | 0.000349  |
| C  | 2.636505  | 0.416966  | 1.237425  |
| C  | 3.493602  | 1.530209  | 1.201831  |
| C  | 3.937829  | 2.097293  | -0.000119 |
| C  | 3.494155  | 1.529553  | -1.201977 |
| C  | 2.637072  | 0.416308  | -1.237363 |
| C  | 2.231282  | -0.117749 | 0.000086  |
| H  | 3.817776  | 1.963743  | 2.152769  |
| H  | 3.818771  | 1.962571  | -2.153001 |
| I  | 0.956016  | -1.831449 | 0.000257  |
| C  | 2.195180  | -0.142567 | 2.566401  |
| H  | 1.097870  | -0.128206 | 2.664484  |
| H  | 2.514565  | -1.189911 | 2.689499  |
| H  | 2.621391  | 0.444445  | 3.391316  |
| C  | 2.196334  | -0.143936 | -2.566236 |
| H  | 2.515768  | -1.191346 | -2.688632 |
| H  | 1.099067  | -0.129620 | -2.664815 |
| H  | 2.622917  | 0.442633  | -3.391274 |
| C  | 4.883795  | 3.275147  | -0.000253 |
| H  | 5.933258  | 2.934929  | -0.001314 |
| H  | 4.742569  | 3.902593  | -0.892297 |
| H  | 4.744017  | 3.901654  | 0.892670  |

### IVa\_F

Zero-point correction= 0.169006 (Hartree/Particle)  
Thermal correction to Energy= 0.184230  
Thermal correction to Enthalpy= 0.185174  
Thermal correction to Gibbs Free Energy= 0.123120  
Sum of electronic and zero-point Energies= -657.291875  
Sum of electronic and thermal Energies= -657.276650  
Sum of electronic and thermal Enthalpies= -657.275706  
Sum of electronic and thermal Free Energies= -657.337760  
E(RB-P86) = -657.460880426 A.U

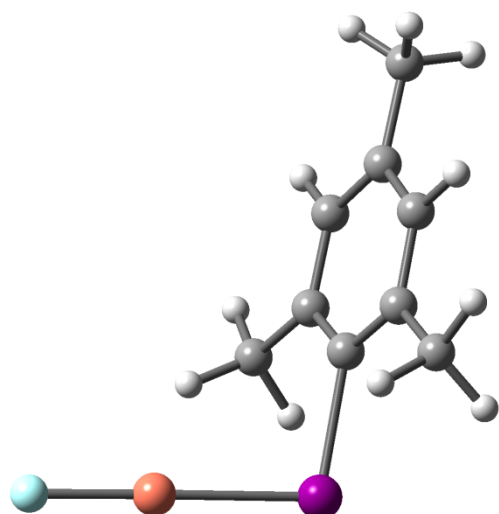

|    |           |           |           |
|----|-----------|-----------|-----------|
| Cu | -2.304009 | 0.702500  | 0.565656  |
| F  | -3.295911 | 1.951872  | 1.450401  |
| C  | 1.819768  | -1.049630 | 0.589354  |
| C  | 3.120715  | -0.568407 | 0.815313  |
| C  | 3.575634  | 0.645485  | 0.282034  |
| C  | 2.690064  | 1.400203  | -0.498459 |
| C  | 1.376193  | 0.978114  | -0.768096 |
| C  | 0.982066  | -0.247450 | -0.204723 |
| H  | 3.793264  | -1.170745 | 1.433300  |
| H  | 3.021649  | 2.353697  | -0.919993 |
| I  | -1.009630 | -0.968719 | -0.606137 |
| C  | 1.392501  | -2.364536 | 1.192205  |
| H  | 0.511075  | -2.243695 | 1.841830  |
| H  | 1.125248  | -3.099335 | 0.415768  |
| H  | 2.205664  | -2.791052 | 1.794749  |
| C  | 0.473382  | 1.837967  | -1.614455 |
| H  | 0.101632  | 1.290787  | -2.495261 |
| H  | -0.411948 | 2.171560  | -1.046347 |
| H  | 1.009332  | 2.730396  | -1.964215 |
| C  | 4.991617  | 1.113154  | 0.520264  |
| H  | 5.674887  | 0.686428  | -0.233316 |
| H  | 5.069813  | 2.207725  | 0.452239  |
| H  | 5.357603  | 0.797600  | 1.508244  |

**[CuF(OTf)]<sup>-</sup>**

Zero-point correction= 0.027853 (Hartree/Particle)  
Thermal correction to Energy= 0.039012  
Thermal correction to Enthalpy= 0.039956  
Thermal correction to Gibbs Free Energy= -0.012205  
Sum of electronic and zero-point Energies= -1258.234887  
Sum of electronic and thermal Energies= -1258.223729  
Sum of electronic and thermal Enthalpies= -1258.222784  
Sum of electronic and thermal Free Energies= -1258.274946  
E(RB-P86) = -1258.26274063 A.U

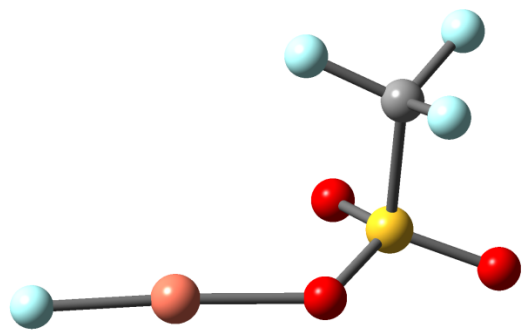

|    |           |           |           |
|----|-----------|-----------|-----------|
| Cu | -2.005613 | -0.005373 | -0.173231 |
| C  | 1.701857  | -0.781858 | -0.005940 |
| S  | 0.832099  | 0.896690  | 0.084963  |
| O  | 1.785170  | 1.830892  | -0.524163 |
| O  | 0.501188  | 1.065908  | 1.506140  |
| O  | -0.375528 | 0.678777  | -0.821596 |
| F  | 2.004237  | -1.094124 | -1.284664 |
| F  | 0.917219  | -1.759452 | 0.499083  |
| F  | 2.849665  | -0.744741 | 0.708123  |
| F  | -3.620963 | -0.635538 | 0.346001  |

**la\_F\_Mes**

Zero-point correction= 0.258062 (Hartree/Particle)  
Thermal correction to Energy= 0.280908  
Thermal correction to Enthalpy= 0.281853  
Thermal correction to Gibbs Free Energy= 0.201022  
Sum of electronic and zero-point Energies= -988.746919  
Sum of electronic and thermal Energies= -988.724072  
Sum of electronic and thermal Enthalpies= -988.723128  
Sum of electronic and thermal Free Energies= -988.803958  
E(RB-P86) = -989.004980176 A.U.

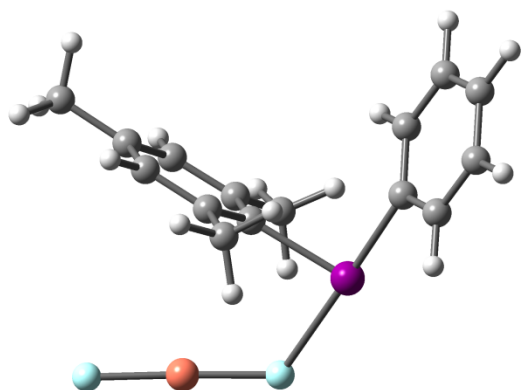

|    |           |           |           |
|----|-----------|-----------|-----------|
| C  | -2.751007 | -0.237171 | 0.053609  |
| C  | -3.072922 | 0.815193  | 0.914596  |
| C  | -3.664363 | -0.739914 | -0.877418 |
| C  | -4.349571 | 1.383625  | 0.828723  |
| H  | -2.351525 | 1.196428  | 1.639534  |
| C  | -4.942506 | -0.168504 | -0.939829 |
| H  | -3.396042 | -1.557629 | -1.549493 |
| C  | -5.282482 | 0.891461  | -0.092694 |
| H  | -4.613331 | 2.210230  | 1.492078  |
| H  | -5.666120 | -0.552217 | -1.662267 |
| H  | -6.277682 | 1.337288  | -0.150221 |
| I  | -0.831339 | -1.199106 | 0.181393  |
| C  | 0.321719  | 0.599189  | 0.078315  |
| C  | 0.400967  | 1.264570  | -1.158711 |
| C  | 0.955360  | 1.034214  | 1.257246  |
| C  | 1.147228  | 2.453917  | -1.175157 |
| C  | 1.687645  | 2.228421  | 1.161764  |
| C  | 1.788646  | 2.954251  | -0.033599 |
| H  | 1.231197  | 2.996480  | -2.121088 |
| H  | 2.198922  | 2.592617  | 2.057300  |
| Cu | 2.990788  | -1.422307 | -0.212430 |
| F  | 4.532432  | -0.618389 | -0.723425 |
| F  | 1.447213  | -2.285455 | 0.309047  |
| C  | 0.911293  | 0.281955  | 2.563910  |
| H  | 1.513142  | 0.800625  | 3.321622  |
| H  | -0.115898 | 0.191429  | 2.951917  |
| H  | 1.311350  | -0.737043 | 2.442659  |
| C  | -0.256520 | 0.774554  | -2.423343 |
| H  | -1.354920 | 0.783972  | -2.337999 |
| H  | 0.019480  | 1.417610  | -3.269271 |
| H  | 0.046981  | -0.256319 | -2.664494 |
| C  | 2.558488  | 4.250891  | -0.087161 |
| H  | 2.975051  | 4.428812  | -1.088871 |
| H  | 1.898257  | 5.102115  | 0.150550  |
| H  | 3.380622  | 4.259818  | 0.642586  |

**TS\_la\_F\_Mes**

Zero-point correction=

0.257240 (Hartree/Particle)

Thermal correction to Energy= 0.279254  
 Thermal correction to Enthalpy= 0.280198  
 Thermal correction to Gibbs Free Energy= 0.203434  
 Sum of electronic and zero-point Energies= -988.741555  
 Sum of electronic and thermal Energies= -988.719541  
 Sum of electronic and thermal Enthalpies= -988.718597  
 Sum of electronic and thermal Free Energies= -988.795361  
 E(RB-P86) = -988.998794991 A.U

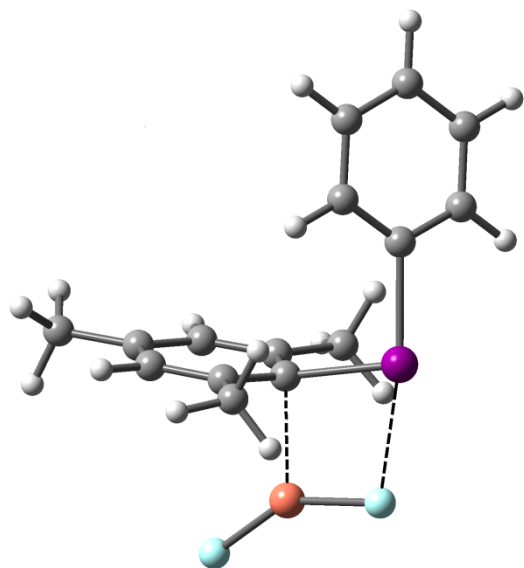

|    |           |           |           |
|----|-----------|-----------|-----------|
| C  | 2.549054  | -0.059382 | 0.059111  |
| C  | 3.500314  | -0.317627 | -0.934148 |
| C  | 2.708206  | 0.986347  | 0.974287  |
| C  | 4.640526  | 0.493948  | -1.004983 |
| C  | 3.845815  | 1.796560  | 0.881325  |
| C  | 4.810802  | 1.549757  | -0.103177 |
| H  | 5.389898  | 0.299556  | -1.775362 |
| H  | 3.977560  | 2.618933  | 1.587887  |
| I  | 0.861571  | -1.380217 | 0.190009  |
| C  | -0.619308 | 0.219052  | 0.047784  |
| C  | -1.092899 | 0.763161  | 1.276086  |
| C  | -0.694707 | 0.914963  | -1.190074 |
| C  | -1.733174 | 2.008192  | 1.204449  |
| C  | -1.346552 | 2.156692  | -1.171750 |
| C  | -1.863418 | 2.722869  | 0.002845  |
| H  | -2.133998 | 2.434187  | 2.128764  |
| H  | -1.442500 | 2.700059  | -2.116354 |
| Cu | -2.402050 | -1.049055 | -0.224897 |
| F  | -4.080082 | -0.399119 | -0.722496 |
| F  | -1.284189 | -2.566689 | 0.228064  |
| H  | 5.698126  | 2.183141  | -0.166853 |
| H  | 1.965554  | 1.181356  | 1.749946  |
| H  | 3.364735  | -1.134615 | -1.646033 |
| C  | -0.124044 | 0.380195  | -2.479341 |

|   |           |           |           |
|---|-----------|-----------|-----------|
| H | -0.524810 | 0.941758  | -3.333618 |
| H | 0.974022  | 0.476914  | -2.501991 |
| H | -0.364545 | -0.683836 | -2.624554 |
| C | -0.951072 | 0.060771  | 2.604960  |
| H | 0.087254  | 0.094517  | 2.974345  |
| H | -1.587247 | 0.544751  | 3.357788  |
| H | -1.240079 | -0.998870 | 2.537361  |
| C | -2.564955 | 4.057520  | -0.027347 |
| H | -2.443433 | 4.596076  | 0.923637  |
| H | -2.185943 | 4.691490  | -0.841780 |
| H | -3.647481 | 3.922818  | -0.191942 |

### Ila\_F\_Mes

|                                              |                             |
|----------------------------------------------|-----------------------------|
| Zero-point correction=                       | 0.257355 (Hartree/Particle) |
| Thermal correction to Energy=                | 0.280162                    |
| Thermal correction to Enthalpy=              | 0.281106                    |
| Thermal correction to Gibbs Free Energy=     | 0.201881                    |
| Sum of electronic and zero-point Energies=   | -988.743031                 |
| Sum of electronic and thermal Energies=      | -988.720223                 |
| Sum of electronic and thermal Enthalpies=    | -988.719279                 |
| Sum of electronic and thermal Free Energies= | -988.798505                 |
| E(RB-P86) =                                  | -989.000385633 A.U          |

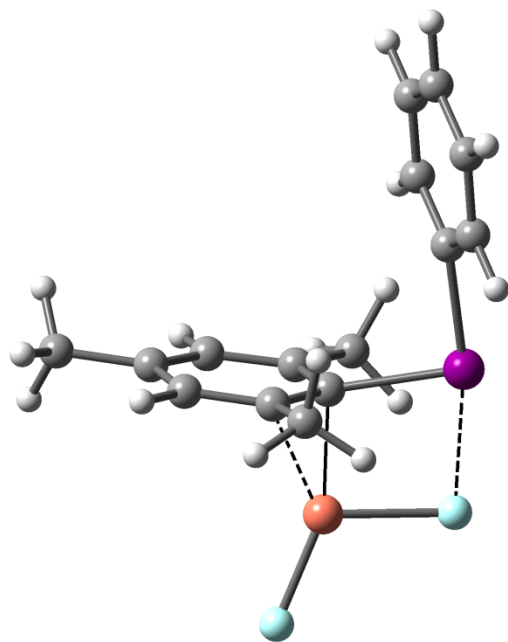

|   |           |           |           |
|---|-----------|-----------|-----------|
| C | -2.541382 | -0.075634 | -0.030812 |
| C | -3.352559 | -0.287540 | 1.090011  |
| C | -2.849016 | 0.903638  | -0.981580 |
| C | -4.498639 | 0.500703  | 1.257122  |
| H | -3.102809 | -1.054509 | 1.826003  |
| C | -3.990728 | 1.692068  | -0.794956 |
| H | -2.219835 | 1.058725  | -1.859316 |
| C | -4.814407 | 1.490169  | 0.319602  |



|    |           |           |           |
|----|-----------|-----------|-----------|
| H  | -5.138694 | 0.340488  | 2.127539  |
| H  | -4.237866 | 2.461214  | -1.530070 |
| H  | -5.706056 | 2.105818  | 0.456173  |
| I  | -0.843791 | -1.375414 | -0.284034 |
| C  | 0.643800  | 0.216713  | -0.123856 |
| C  | 1.083195  | 0.830425  | -1.345664 |
| C  | 0.856054  | 0.828152  | 1.155931  |
| C  | 1.707678  | 2.076011  | -1.240976 |
| C  | 1.496367  | 2.090347  | 1.161588  |
| C  | 1.900932  | 2.733649  | -0.008092 |
| H  | 2.062681  | 2.550353  | -2.160589 |
| H  | 1.657145  | 2.574846  | 2.128773  |
| Cu | 2.271906  | -0.804456 | 0.309769  |
| F  | 4.035091  | -1.155258 | 0.852296  |
| F  | 1.291135  | -2.513202 | -0.377359 |
| C  | 0.897288  | 0.184360  | -2.696556 |
| H  | 1.534034  | 0.679418  | -3.441757 |
| H  | 1.154899  | -0.884240 | -2.673419 |
| H  | -0.145207 | 0.264972  | -3.045813 |
| C  | 0.289987  | 0.289526  | 2.450273  |
| H  | 0.886294  | 0.647555  | 3.300347  |
| H  | -0.743710 | 0.647259  | 2.593185  |
| H  | 0.269655  | -0.808142 | 2.481952  |
| C  | 2.568496  | 4.084959  | 0.034615  |
| H  | 2.085486  | 4.787709  | -0.662068 |
| H  | 2.535464  | 4.518105  | 1.043653  |
| H  | 3.625766  | 4.007502  | -0.268415 |

### TS\_Ila\_F\_Mes

|                                              |                             |
|----------------------------------------------|-----------------------------|
| Zero-point correction=                       | 0.256348 (Hartree/Particle) |
| Thermal correction to Energy=                | 0.278849                    |
| Thermal correction to Enthalpy=              | 0.279794                    |
| Thermal correction to Gibbs Free Energy=     | 0.200574                    |
| Sum of electronic and zero-point Energies=   | -988.732672                 |
| Sum of electronic and thermal Energies=      | -988.710171                 |
| Sum of electronic and thermal Enthalpies=    | -988.709227                 |
| Sum of electronic and thermal Free Energies= | -988.788446                 |
| E(RB-P86) =                                  | -988.989020242 A.U.         |

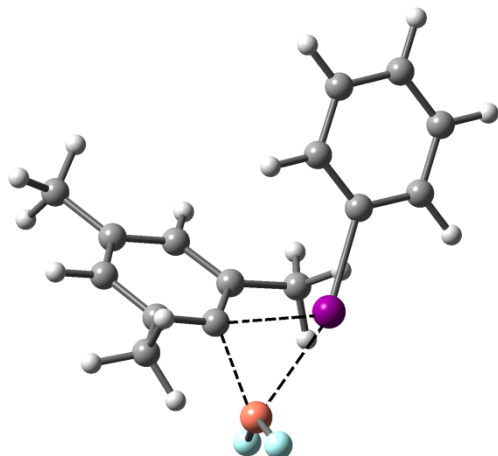

|    |           |           |           |
|----|-----------|-----------|-----------|
| C  | -2.527177 | -0.185936 | -0.119410 |
| C  | -3.290080 | -0.451063 | 1.026690  |
| C  | -2.885578 | 0.829746  | -1.016388 |
| C  | -4.438208 | 0.311276  | 1.267849  |
| H  | -3.001965 | -1.244261 | 1.718938  |
| C  | -4.033867 | 1.586630  | -0.756842 |
| H  | -2.285802 | 1.026874  | -1.906369 |
| C  | -4.809031 | 1.329300  | 0.380759  |
| H  | -5.041436 | 0.106671  | 2.155105  |
| H  | -4.321717 | 2.378956  | -1.451399 |
| H  | -5.704178 | 1.923594  | 0.576066  |
| I  | -0.815119 | -1.370656 | -0.505863 |
| C  | 1.282344  | 0.440865  | 0.036362  |
| C  | 1.724000  | 0.912942  | -1.203371 |
| C  | 0.891604  | 1.227136  | 1.129297  |
| C  | 1.971030  | 2.302050  | -1.254920 |
| C  | 1.153607  | 2.602150  | 0.991758  |
| C  | 1.693038  | 3.155202  | -0.181262 |
| H  | 2.373362  | 2.709111  | -2.187943 |
| H  | 0.920945  | 3.250182  | 1.842509  |
| Cu | 2.062336  | -1.330771 | 0.535531  |
| F  | 3.039136  | -0.926924 | 2.048687  |
| F  | 1.647554  | -2.607852 | -0.771342 |
| C  | 1.938751  | 0.065753  | -2.432270 |
| H  | 2.727248  | 0.498048  | -3.063860 |
| H  | 2.198676  | -0.969715 | -2.174186 |
| H  | 1.012373  | 0.031660  | -3.030398 |
| C  | 0.318954  | 0.678496  | 2.409440  |
| H  | 0.137038  | 1.488994  | 3.127677  |
| H  | -0.635214 | 0.158141  | 2.233156  |
| H  | 1.021762  | -0.042648 | 2.855006  |
| C  | 1.959992  | 4.637952  | -0.279724 |
| H  | 1.990482  | 4.972055  | -1.326335 |
| H  | 1.192684  | 5.219654  | 0.251837  |
| H  | 2.932819  | 4.887825  | 0.176585  |

### IIIa'\_F\_Mes

Zero-point correction= 0.169406 (Hartree/Particle)  
Thermal correction to Energy= 0.184391  
Thermal correction to Enthalpy= 0.185336  
Thermal correction to Gibbs Free Energy= 0.125006  
Sum of electronic and zero-point Energies= -745.702413  
Sum of electronic and thermal Energies= -745.687428  
Sum of electronic and thermal Enthalpies= -745.686483  
Sum of electronic and thermal Free Energies= -745.746814  
E(RB-P86) = -745.871819128 A.U

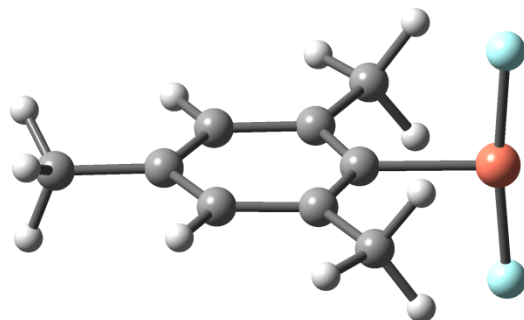

|    |           |           |           |
|----|-----------|-----------|-----------|
| C  | 0.043797  | -0.000055 | -0.000036 |
| C  | 0.634501  | -1.249234 | -0.005072 |
| C  | 0.634387  | 1.249176  | -0.005165 |
| C  | 2.047335  | -1.206605 | -0.008726 |
| C  | 2.047234  | 1.206670  | -0.008802 |
| C  | 2.760289  | 0.000066  | -0.007762 |
| H  | 2.580567  | -2.162449 | -0.015230 |
| H  | 2.580381  | 2.162561  | -0.015369 |
| Cu | -1.876317 | -0.000002 | 0.004729  |
| F  | -1.994501 | 0.000202  | 1.773628  |
| F  | -1.995369 | -0.000217 | -1.763780 |
| C  | -0.126734 | -2.550523 | -0.009606 |
| H  | 0.564355  | -3.403373 | -0.017933 |
| H  | -0.767501 | -2.632681 | 0.882155  |
| H  | -0.776263 | -2.621840 | -0.895875 |
| C  | -0.126942 | 2.550407  | -0.009813 |
| H  | 0.564085  | 3.403307  | -0.018199 |
| H  | -0.776463 | 2.621614  | -0.896099 |
| H  | -0.767726 | 2.632592  | 0.881934  |
| C  | 4.272131  | 0.000116  | 0.016984  |
| H  | 4.680189  | -0.891686 | -0.479597 |
| H  | 4.680114  | 0.892533  | -0.478544 |
| H  | 4.644315  | -0.000496 | 1.054957  |

### IIIa\_F\_Mes

Zero-point correction= 0.196013 (Hartree/Particle)  
Thermal correction to Energy= 0.220072  
Thermal correction to Enthalpy= 0.221016  
Thermal correction to Gibbs Free Energy= 0.138175

Sum of electronic and zero-point Energies= -1707.599594  
 Sum of electronic and thermal Energies= -1707.575536  
 Sum of electronic and thermal Enthalpies= -1707.574592  
 Sum of electronic and thermal Free Energies= -1707.657433  
 E(RB-P86) = -1707.79560796 A.U

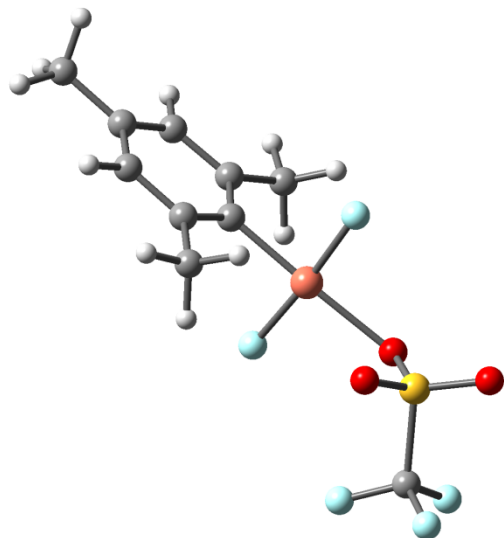

|    |           |           |           |
|----|-----------|-----------|-----------|
| C  | -2.171501 | 0.073042  | -0.005842 |
| C  | -2.574381 | -1.253396 | 0.013967  |
| C  | -2.988723 | 1.189101  | -0.122995 |
| C  | -3.967395 | -1.459662 | -0.091946 |
| C  | -4.368175 | 0.914107  | -0.225805 |
| C  | -4.871565 | -0.395445 | -0.209567 |
| H  | -4.334848 | -2.490987 | -0.081331 |
| H  | -5.053741 | 1.762365  | -0.323641 |
| Cu | -0.290019 | 0.402531  | 0.136134  |
| F  | -0.215847 | 0.352738  | -1.665706 |
| C  | 3.944517  | -0.161280 | -0.747642 |
| S  | 2.773388  | -0.085668 | 0.735615  |
| O  | 3.630081  | 0.402270  | 1.827969  |
| O  | 2.249094  | -1.457521 | 0.850284  |
| O  | 1.752776  | 0.923982  | 0.278012  |
| F  | 3.305375  | -0.609175 | -1.851699 |
| F  | 4.972365  | -1.003625 | -0.485259 |
| F  | 4.459295  | 1.059960  | -1.021617 |
| F  | -0.498403 | 0.433862  | 1.928662  |
| C  | -2.459003 | 2.602263  | -0.148091 |
| H  | -1.897580 | 2.828888  | 0.772090  |
| H  | -1.772523 | 2.749491  | -0.996730 |
| H  | -3.280086 | 3.326322  | -0.238133 |
| C  | -1.610109 | -2.407811 | 0.136007  |
| H  | -0.903556 | -2.419553 | -0.708712 |
| H  | -1.015662 | -2.326043 | 1.059212  |
| H  | -2.145851 | -3.366478 | 0.151871  |
| C  | -6.360387 | -0.648461 | -0.297641 |

|   |           |           |           |
|---|-----------|-----------|-----------|
| H | -6.849379 | -0.469726 | 0.674537  |
| H | -6.837597 | 0.021124  | -1.028962 |
| H | -6.573168 | -1.686552 | -0.590137 |

### TS\_Illa\_F\_Mes

|                                              |                             |
|----------------------------------------------|-----------------------------|
| Zero-point correction=                       | 0.194556 (Hartree/Particle) |
| Thermal correction to Energy=                | 0.218505                    |
| Thermal correction to Enthalpy=              | 0.219450                    |
| Thermal correction to Gibbs Free Energy=     | 0.135433                    |
| Sum of electronic and zero-point Energies=   | -1707.586354                |
| Sum of electronic and thermal Energies=      | -1707.562405                |
| Sum of electronic and thermal Enthalpies=    | -1707.561461                |
| Sum of electronic and thermal Free Energies= | -1707.645478                |
| E(RB-P86) =                                  | -1707.78091088 A.U          |

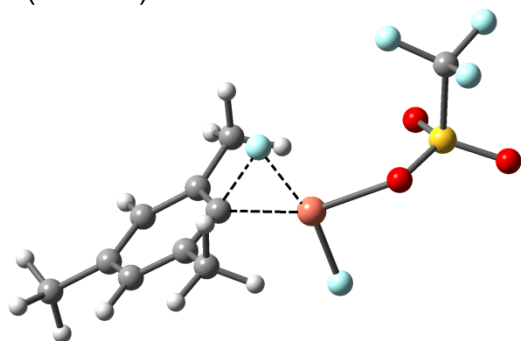

|    |           |           |           |
|----|-----------|-----------|-----------|
| C  | 2.065090  | -0.021504 | -0.313496 |
| C  | 2.489045  | 1.297016  | -0.141169 |
| C  | 2.881314  | -1.126223 | -0.561451 |
| C  | 3.879625  | 1.458591  | -0.006410 |
| C  | 4.259887  | -0.887837 | -0.416304 |
| C  | 4.777448  | 0.386529  | -0.134314 |
| H  | 4.260800  | 2.466735  | 0.185674  |
| H  | 4.941257  | -1.734754 | -0.546197 |
| Cu | 0.288368  | -0.466578 | 0.484509  |
| F  | 0.531097  | -0.077338 | -1.359835 |
| C  | -3.810221 | 0.195133  | -0.871633 |
| S  | -2.835717 | 0.056102  | 0.743340  |
| O  | -3.850513 | -0.364806 | 1.724573  |
| O  | -2.252425 | 1.399360  | 0.925256  |
| O  | -1.825104 | -1.004283 | 0.413387  |
| F  | -3.007247 | 0.571441  | -1.893849 |
| F  | -4.796096 | 1.116627  | -0.750615 |
| F  | -4.379765 | -0.989662 | -1.196994 |
| F  | 0.608228  | -0.778861 | 2.272547  |
| C  | 2.344856  | -2.486046 | -0.930084 |
| H  | 1.607792  | -2.843990 | -0.192668 |
| H  | 1.839456  | -2.457956 | -1.907786 |
| H  | 3.160884  | -3.219599 | -0.981851 |
| C  | 1.542749  | 2.468970  | -0.086501 |
| H  | 1.097489  | 2.656959  | -1.076209 |
| H  | 0.710410  | 2.287683  | 0.611930  |

|   |          |           |           |
|---|----------|-----------|-----------|
| H | 2.072264 | 3.377031  | 0.232581  |
| C | 6.264634 | 0.600497  | 0.022488  |
| H | 6.564292 | 1.603123  | -0.316516 |
| H | 6.566673 | 0.509623  | 1.079942  |
| H | 6.839315 | -0.144497 | -0.546856 |

**e. Copper species for reactions of [Mes(Ar)I]<sup>+</sup> with [CuF<sub>2</sub>]<sup>-</sup>, adducts and transition structures not documented above, (Table 3)**

**Reactions of [3,5-Me<sub>2</sub>C<sub>6</sub>H<sub>4</sub>(Ph)I]BF<sub>4</sub>**

**G-I: adducts**

|                                              |                             |
|----------------------------------------------|-----------------------------|
| Zero-point correction=                       | 0.335723 (Hartree/Particle) |
| Thermal correction to Energy=                | 0.370132                    |
| Thermal correction to Enthalpy=              | 0.371076                    |
| Thermal correction to Gibbs Free Energy=     | 0.260000                    |
| Sum of electronic and zero-point Energies=   | -1929.175668                |
| Sum of electronic and thermal Energies=      | -1929.141260                |
| Sum of electronic and thermal Enthalpies=    | -1929.140315                |
| Sum of electronic and thermal Free Energies= | -1929.251391                |
| E(RB-P86) =                                  | -1929.51139149 A.U.         |

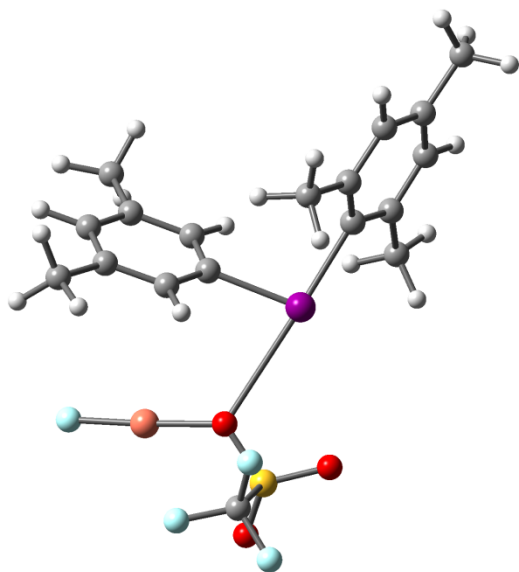

|   |           |           |           |
|---|-----------|-----------|-----------|
| O | -2.094900 | -0.472026 | -0.428577 |
| C | 2.998845  | -0.849009 | 0.004691  |
| C | 3.720560  | -1.167364 | -1.163207 |
| C | 3.589238  | -0.648368 | 1.267367  |
| C | 5.113755  | -1.266415 | -1.024937 |
| C | 4.987660  | -0.756288 | 1.326586  |
| C | 5.764257  | -1.064728 | 0.201109  |
| H | 5.704403  | -1.509264 | -1.912817 |
| H | 5.477616  | -0.594102 | 2.290777  |
| I | 0.868208  | -0.729980 | -0.156287 |
| C | 0.588802  | 1.367466  | 0.172778  |
| C | -0.216821 | 1.736554  | 1.251504  |
| C | 1.178474  | 2.271614  | -0.702163 |

|    |           |           |           |
|----|-----------|-----------|-----------|
| C  | -0.442373 | 3.105111  | 1.471471  |
| H  | -0.654853 | 0.991045  | 1.916455  |
| C  | 0.965811  | 3.646671  | -0.476436 |
| H  | 1.789917  | 1.943630  | -1.544235 |
| C  | 0.158869  | 4.033109  | 0.602547  |
| H  | -0.013014 | 5.100110  | 0.773188  |
| Cu | -2.851065 | 1.188461  | -0.910236 |
| C  | -3.704830 | -2.007506 | 1.039790  |
| F  | -3.501354 | 2.811762  | -1.379612 |
| F  | -4.372104 | -3.180781 | 1.063808  |
| F  | -2.821277 | -1.992791 | 2.059535  |
| F  | -4.589006 | -1.004142 | 1.219943  |
| S  | -2.808315 | -1.817336 | -0.616775 |
| O  | -1.831020 | -2.911184 | -0.640846 |
| O  | -3.871900 | -1.792398 | -1.624206 |
| C  | 2.808859  | -0.324175 | 2.515349  |
| H  | 2.280582  | 0.638194  | 2.425536  |
| H  | 2.052665  | -1.095972 | 2.731314  |
| H  | 3.482036  | -0.258767 | 3.380051  |
| C  | 3.087525  | -1.417854 | -2.511055 |
| H  | 2.434811  | -2.305327 | -2.495135 |
| H  | 2.475010  | -0.566513 | -2.844948 |
| H  | 3.864887  | -1.591200 | -3.266671 |
| C  | 7.262240  | -1.205577 | 0.309650  |
| H  | 7.540974  | -2.263718 | 0.448959  |
| H  | 7.764468  | -0.854505 | -0.603504 |
| H  | 7.657630  | -0.643908 | 1.167569  |
| C  | -1.301977 | 3.568122  | 2.622734  |
| H  | -0.719424 | 4.189844  | 3.320977  |
| H  | -2.140013 | 4.183778  | 2.260396  |
| H  | -1.716402 | 2.719034  | 3.182884  |
| C  | 1.598804  | 4.666813  | -1.392198 |
| H  | 1.251349  | 5.681635  | -1.155490 |
| H  | 2.696589  | 4.650622  | -1.298585 |
| H  | 1.359705  | 4.455691  | -2.445810 |

|                                              |                             |
|----------------------------------------------|-----------------------------|
| Zero-point correction=                       | 0.335628 (Hartree/Particle) |
| Thermal correction to Energy=                | 0.369901                    |
| Thermal correction to Enthalpy=              | 0.370845                    |
| Thermal correction to Gibbs Free Energy=     | 0.260268                    |
| Sum of electronic and zero-point Energies=   | -1929.182523                |
| Sum of electronic and thermal Energies=      | -1929.148250                |
| Sum of electronic and thermal Enthalpies=    | -1929.147306                |
| Sum of electronic and thermal Free Energies= | -1929.257883                |
| E(RB-P86) =                                  | -1929.51815112 A.U.         |

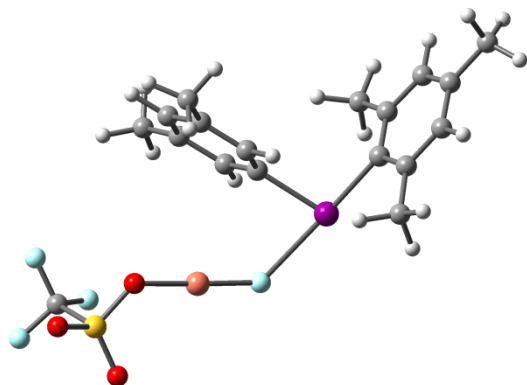

|    |           |           |           |
|----|-----------|-----------|-----------|
| C  | 3.815512  | -0.499908 | -0.163577 |
| C  | 4.463448  | 0.470612  | -0.954603 |
| C  | 4.435767  | -1.152688 | 0.922214  |
| C  | 5.779118  | 0.805768  | -0.598248 |
| C  | 5.755502  | -0.775815 | 1.217302  |
| C  | 6.439509  | 0.201937  | 0.480968  |
| H  | 6.301726  | 1.559538  | -1.194438 |
| H  | 6.261361  | -1.270234 | 2.051707  |
| I  | 1.813751  | -1.087930 | -0.670037 |
| C  | 0.850448  | 0.746119  | -0.127071 |
| C  | 1.011662  | 1.230346  | 1.165096  |
| C  | 0.078644  | 1.378605  | -1.102998 |
| C  | 0.359389  | 2.430769  | 1.512573  |
| H  | 1.618358  | 0.704146  | 1.903829  |
| C  | -0.579021 | 2.570914  | -0.759931 |
| H  | -0.014750 | 0.966039  | -2.108380 |
| C  | -0.425326 | 3.072679  | 0.544903  |
| H  | -0.939292 | 3.999631  | 0.816441  |
| Cu | -1.959749 | -1.053062 | -0.154113 |
| F  | -0.629207 | -1.747634 | -1.214479 |
| C  | -5.453105 | 0.309041  | -0.394936 |
| S  | -4.715962 | -0.798648 | 0.951286  |
| F  | -5.327925 | 1.611944  | -0.063675 |
| F  | -6.766304 | 0.030944  | -0.552158 |
| F  | -4.828617 | 0.105406  | -1.576302 |
| O  | -4.891144 | -2.165584 | 0.443449  |
| O  | -5.427261 | -0.411407 | 2.173847  |
| O  | -3.264553 | -0.325313 | 0.991418  |
| C  | 7.845838  | 0.604879  | 0.850913  |
| H  | 7.832356  | 1.396893  | 1.618733  |
| H  | 8.409947  | -0.242611 | 1.266571  |
| H  | 8.391985  | 0.998791  | -0.018025 |
| C  | 3.772786  | -2.229984 | 1.749023  |
| H  | 2.822119  | -1.890783 | 2.188274  |
| H  | 3.552827  | -3.127133 | 1.148202  |
| H  | 4.432734  | -2.535924 | 2.571728  |
| C  | 3.816433  | 1.147243  | -2.137266 |
| H  | 3.448158  | 0.413334  | -2.871787 |



|   |           |          |           |
|---|-----------|----------|-----------|
| H | 2.955846  | 1.763985 | -1.832711 |
| H | 4.536494  | 1.803049 | -2.644332 |
| C | 0.510276  | 2.995460 | 2.905107  |
| H | 1.546778  | 3.323014 | 3.086075  |
| H | -0.151051 | 3.859620 | 3.055748  |
| H | 0.271090  | 2.239292 | 3.668593  |
| C | -1.411279 | 3.309927 | -1.780173 |
| H | -1.603207 | 2.691224 | -2.667424 |
| H | -2.378094 | 3.615421 | -1.352739 |
| H | -0.897518 | 4.227247 | -2.111375 |

|                                              |                             |
|----------------------------------------------|-----------------------------|
| Zero-point correction=                       | 0.335693 (Hartree/Particle) |
| Thermal correction to Energy=                | 0.369917                    |
| Thermal correction to Enthalpy=              | 0.370861                    |
| Thermal correction to Gibbs Free Energy=     | 0.261071                    |
| Sum of electronic and zero-point Energies=   | -1929.183692                |
| Sum of electronic and thermal Energies=      | -1929.149468                |
| Sum of electronic and thermal Enthalpies=    | -1929.148524                |
| Sum of electronic and thermal Free Energies= | -1929.258314                |
| E(RB-P86) =                                  | -1929.51938499 A.U.         |

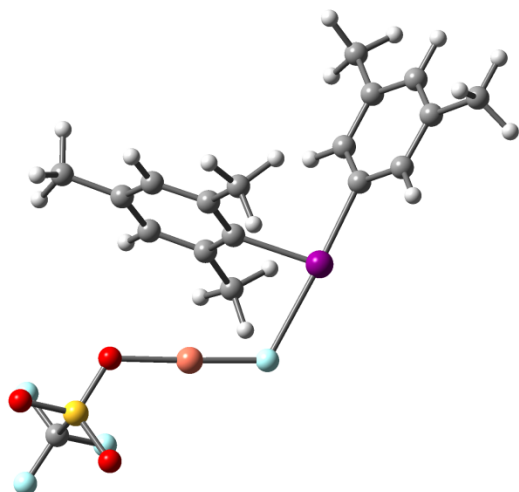

|   |          |           |           |
|---|----------|-----------|-----------|
| C | 3.843780 | -0.426391 | -0.212771 |
| C | 4.174027 | 0.789367  | -0.814752 |
| C | 4.767734 | -1.197749 | 0.488728  |
| C | 5.490164 | 1.264345  | -0.701896 |
| H | 3.430189 | 1.372783  | -1.361129 |
| C | 6.097157 | -0.740952 | 0.590994  |
| H | 4.478666 | -2.141689 | 0.957358  |
| C | 6.430404 | 0.482368  | -0.005522 |
| H | 7.460521 | 0.843438  | 0.072869  |
| I | 1.858625 | -1.225450 | -0.414868 |
| C | 0.826270 | 0.584634  | 0.059736  |
| C | 0.864098 | 1.039423  | 1.391589  |
| C | 0.148260 | 1.240254  | -0.985074 |
| C | 0.193780 | 2.244442  | 1.653706  |

|    |           |           |           |
|----|-----------|-----------|-----------|
| C  | -0.505258 | 2.436420  | -0.643897 |
| C  | -0.487843 | 2.957509  | 0.656846  |
| H  | 0.202278  | 2.626262  | 2.678630  |
| H  | -1.047066 | 2.969694  | -1.429974 |
| Cu | -1.920245 | -1.095677 | 0.135506  |
| F  | -0.553359 | -2.097142 | -0.580753 |
| C  | -5.325555 | 0.178009  | -0.819320 |
| S  | -4.745350 | -0.493587 | 0.852804  |
| F  | -5.178593 | 1.519098  | -0.872518 |
| F  | -6.630873 | -0.118041 | -1.005719 |
| F  | -4.613958 | -0.370931 | -1.829103 |
| O  | -4.922879 | -1.948004 | 0.750633  |
| O  | -5.545554 | 0.240043  | 1.838616  |
| O  | -3.287093 | -0.041017 | 0.886937  |
| C  | 1.566398  | 0.311610  | 2.509042  |
| H  | 1.211123  | -0.726854 | 2.600967  |
| H  | 2.655404  | 0.273403  | 2.346009  |
| H  | 1.386633  | 0.818933  | 3.465801  |
| C  | 0.072548  | 0.721944  | -2.400175 |
| H  | 1.065841  | 0.677677  | -2.874732 |
| H  | -0.352345 | -0.293538 | -2.425930 |
| H  | -0.563130 | 1.377213  | -3.009921 |
| C  | -1.176862 | 4.260434  | 0.979594  |
| H  | -0.446315 | 5.086004  | 1.014903  |
| H  | -1.930410 | 4.514962  | 0.221460  |
| H  | -1.667970 | 4.219298  | 1.962983  |
| C  | 7.122000  | -1.554670 | 1.345095  |
| H  | 8.125116  | -1.116619 | 1.250416  |
| H  | 6.872650  | -1.605981 | 2.417302  |
| H  | 7.160015  | -2.590018 | 0.972259  |
| C  | 5.885753  | 2.590275  | -1.307000 |
| H  | 5.960446  | 3.366724  | -0.527563 |
| H  | 6.869002  | 2.525804  | -1.796580 |
| H  | 5.149026  | 2.930738  | -2.047847 |

### G-I: TS's

|                                              |                             |
|----------------------------------------------|-----------------------------|
| Zero-point correction=                       | 0.333754 (Hartree/Particle) |
| Thermal correction to Energy=                | 0.367764                    |
| Thermal correction to Enthalpy=              | 0.368708                    |
| Thermal correction to Gibbs Free Energy=     | 0.259674                    |
| Sum of electronic and zero-point Energies=   | -1929.168034                |
| Sum of electronic and thermal Energies=      | -1929.134025                |
| Sum of electronic and thermal Enthalpies=    | -1929.133081                |
| Sum of electronic and thermal Free Energies= | -1929.242115                |
| E(RB-P86) =                                  | -1929.50178881 A.U.         |

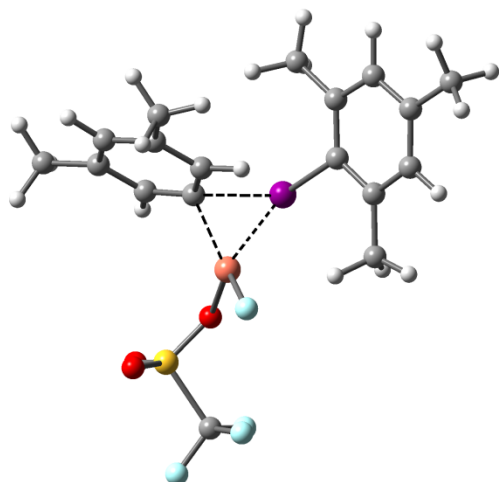

|    |           |           |           |
|----|-----------|-----------|-----------|
| O  | -2.462714 | -0.415447 | -0.569719 |
| C  | 2.677889  | -1.056416 | -0.514953 |
| C  | 3.832573  | -0.350337 | -0.919181 |
| C  | 2.680320  | -2.128036 | 0.405105  |
| C  | 5.042257  | -0.760403 | -0.342788 |
| C  | 3.930031  | -2.475909 | 0.939164  |
| C  | 5.113942  | -1.813619 | 0.582248  |
| H  | 5.956635  | -0.233750 | -0.629380 |
| H  | 3.970913  | -3.297227 | 1.659790  |
| I  | 0.841462  | -0.505154 | -1.413348 |
| C  | 0.346106  | 1.531722  | 0.072624  |
| C  | 1.386395  | 1.816941  | 0.951035  |
| C  | -0.425070 | 2.484107  | -0.590306 |
| C  | 1.566719  | 3.163611  | 1.320975  |
| H  | 2.015486  | 1.034269  | 1.380296  |
| C  | -0.245952 | 3.831661  | -0.215165 |
| H  | -1.163865 | 2.215296  | -1.346712 |
| C  | 0.751779  | 4.140773  | 0.722224  |
| H  | 0.916931  | 5.190223  | 0.983034  |
| Cu | -0.734314 | -0.029284 | 0.573001  |
| C  | -4.621314 | -1.667067 | 0.322863  |
| F  | -0.688320 | -0.669322 | 2.351613  |
| F  | -5.905576 | -1.494352 | 0.712669  |
| F  | -4.608379 | -2.515055 | -0.730912 |
| F  | -3.942788 | -2.243329 | 1.340033  |
| S  | -3.852671 | -0.002882 | -0.141917 |
| O  | -4.678865 | 0.472535  | -1.261643 |
| O  | -3.886009 | 0.777028  | 1.105650  |
| C  | 3.818790  | 0.786777  | -1.908876 |
| H  | 3.429793  | 0.467847  | -2.888769 |
| H  | 3.190014  | 1.621367  | -1.559538 |
| H  | 4.835838  | 1.171344  | -2.058938 |
| C  | 1.446763  | -2.876960 | 0.835838  |
| H  | 0.742094  | -2.221492 | 1.379367  |
| H  | 0.909516  | -3.303474 | -0.025639 |

|   |           |           |           |
|---|-----------|-----------|-----------|
| H | 1.722868  | -3.703209 | 1.504168  |
| C | 6.439019  | -2.241956 | 1.158416  |
| H | 6.902125  | -3.014657 | 0.521374  |
| H | 7.142813  | -1.399463 | 1.215143  |
| H | 6.319528  | -2.673587 | 2.162199  |
| C | 2.606493  | 3.536684  | 2.349058  |
| H | 3.073069  | 4.501619  | 2.102333  |
| H | 2.144433  | 3.639273  | 3.344751  |
| H | 3.392892  | 2.773139  | 2.423376  |
| C | -1.113294 | 4.906296  | -0.824292 |
| H | -2.013633 | 5.068524  | -0.209060 |
| H | -0.573414 | 5.862198  | -0.882010 |
| H | -1.448089 | 4.628645  | -1.833561 |

|                                              |                             |
|----------------------------------------------|-----------------------------|
| Zero-point correction=                       | 0.333933 (Hartree/Particle) |
| Thermal correction to Energy=                | 0.367769                    |
| Thermal correction to Enthalpy=              | 0.368713                    |
| Thermal correction to Gibbs Free Energy=     | 0.260889                    |
| Sum of electronic and zero-point Energies=   | -1929.167091                |
| Sum of electronic and thermal Energies=      | -1929.133255                |
| Sum of electronic and thermal Enthalpies=    | -1929.132311                |
| Sum of electronic and thermal Free Energies= | -1929.240135                |
| E(RB-P86) =                                  | -1929.50102378 A.U.         |

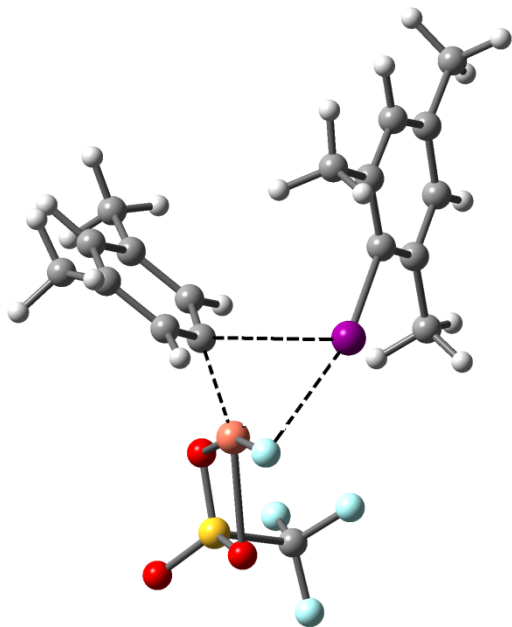

|   |           |           |           |
|---|-----------|-----------|-----------|
| C | -2.515596 | -1.134506 | -0.508069 |
| C | -2.260586 | -2.394059 | 0.077856  |
| C | -3.758482 | -0.470491 | -0.384171 |
| C | -3.311049 | -2.992841 | 0.790509  |
| C | -4.763004 | -1.123740 | 0.341846  |
| C | -4.564511 | -2.381680 | 0.933578  |
| H | -3.136449 | -3.970661 | 1.248630  |

|    |           |           |           |
|----|-----------|-----------|-----------|
| H  | -5.732354 | -0.627879 | 0.448620  |
| I  | -0.982490 | -0.202222 | -1.636436 |
| C  | -0.057442 | 1.729855  | 0.152695  |
| C  | -0.281537 | 3.002523  | -0.358735 |
| C  | -0.424339 | 1.307389  | 1.425259  |
| C  | -0.774336 | 3.980054  | 0.530985  |
| H  | -0.045536 | 3.247210  | -1.394804 |
| C  | -0.920252 | 2.283642  | 2.312585  |
| H  | -0.299639 | 0.275386  | 1.756172  |
| C  | -1.093417 | 3.596820  | 1.843309  |
| H  | -1.512626 | 4.345389  | 2.522301  |
| Cu | 1.542125  | 0.893061  | -0.626183 |
| F  | 1.244714  | 1.414865  | -2.417559 |
| C  | 3.731979  | -2.120599 | 0.571918  |
| S  | 3.745467  | -0.230919 | 0.488402  |
| F  | 2.693672  | -2.614263 | -0.129731 |
| F  | 4.877596  | -2.605195 | 0.053401  |
| F  | 3.626639  | -2.525598 | 1.852940  |
| O  | 3.681688  | 0.091430  | -0.966648 |
| O  | 4.933588  | 0.168101  | 1.238167  |
| O  | 2.414135  | 0.168010  | 1.100541  |
| C  | -0.938317 | -3.109176 | -0.038731 |
| H  | -0.694959 | -3.339316 | -1.088415 |
| H  | -0.111799 | -2.499199 | 0.356752  |
| H  | -0.962637 | -4.054687 | 0.519589  |
| C  | -4.037262 | 0.881853  | -0.991704 |
| H  | -3.342096 | 1.647199  | -0.611900 |
| H  | -3.929608 | 0.862033  | -2.088145 |
| H  | -5.060462 | 1.204056  | -0.756082 |
| C  | -5.679807 | -3.059461 | 1.689643  |
| H  | -6.437898 | -3.455292 | 0.992966  |
| H  | -5.306232 | -3.900321 | 2.290363  |
| H  | -6.195920 | -2.353140 | 2.357687  |
| C  | -0.948453 | 5.405217  | 0.062379  |
| H  | -1.739514 | 5.913404  | 0.632414  |
| H  | -0.016535 | 5.977266  | 0.204322  |
| H  | -1.201754 | 5.448000  | -1.006505 |
| C  | -1.250264 | 1.912569  | 3.738925  |
| H  | -2.127463 | 2.471513  | 4.096795  |
| H  | -1.454175 | 0.837485  | 3.839053  |
| H  | -0.408309 | 2.156464  | 4.407761  |

|                                              |                             |
|----------------------------------------------|-----------------------------|
| Zero-point correction=                       | 0.333701 (Hartree/Particle) |
| Thermal correction to Energy=                | 0.367659                    |
| Thermal correction to Enthalpy=              | 0.368603                    |
| Thermal correction to Gibbs Free Energy=     | 0.260103                    |
| Sum of electronic and zero-point Energies=   | -1929.164086                |
| Sum of electronic and thermal Energies=      | -1929.130128                |
| Sum of electronic and thermal Enthalpies=    | -1929.129184                |
| Sum of electronic and thermal Free Energies= | -1929.237684                |
| E(RB-P86) =                                  | -1929.49778709 A.U.         |

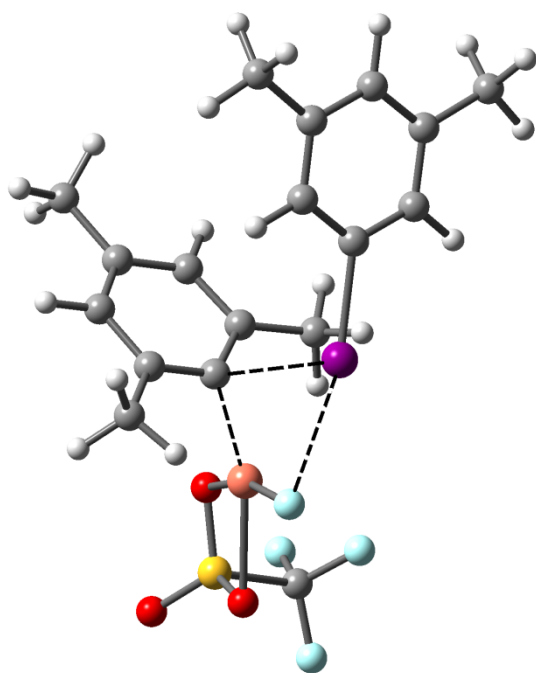

|    |           |           |           |
|----|-----------|-----------|-----------|
| C  | -3.410846 | -0.913765 | -0.154241 |
| C  | -3.714876 | -1.649154 | 0.998575  |
| C  | -4.284040 | 0.060788  | -0.652747 |
| C  | -4.926590 | -1.416723 | 1.668430  |
| H  | -3.021245 | -2.403095 | 1.376634  |
| C  | -5.499466 | 0.304949  | 0.006949  |
| H  | -4.029298 | 0.627164  | -1.550907 |
| C  | -5.798701 | -0.438680 | 1.160674  |
| H  | -6.742555 | -0.249613 | 1.682309  |
| I  | -1.594874 | -1.283825 | -1.170958 |
| C  | 0.161924  | 0.992171  | -0.205558 |
| C  | -0.172590 | 2.026805  | -1.077457 |
| C  | -0.050179 | 0.961099  | 1.179244  |
| C  | -0.593513 | 3.218255  | -0.445718 |
| C  | -0.477762 | 2.180088  | 1.732074  |
| C  | -0.753297 | 3.310950  | 0.941081  |
| H  | -0.819559 | 4.079482  | -1.082611 |
| H  | -0.605510 | 2.229743  | 2.818199  |
| Cu | 1.740537  | -0.034773 | -0.814818 |
| F  | 1.030093  | -1.107849 | -2.125327 |
| C  | 4.896868  | -1.024567 | 1.196563  |
| S  | 4.323194  | 0.256210  | -0.073704 |
| F  | 3.943479  | -1.955803 | 1.388647  |
| F  | 6.015581  | -1.629435 | 0.752559  |
| F  | 5.162116  | -0.419638 | 2.370324  |
| O  | 3.921213  | -0.539167 | -1.271171 |
| O  | 5.437694  | 1.189854  | -0.198039 |
| O  | 3.049430  | 0.824836  | 0.529764  |
| C  | 0.220197  | -0.238138 | 2.050758  |

|   |           |           |           |
|---|-----------|-----------|-----------|
| H | -0.090235 | -0.041366 | 3.085303  |
| H | -0.321012 | -1.123506 | 1.683596  |
| H | 1.293512  | -0.485104 | 2.055115  |
| C | -1.233188 | 4.589861  | 1.583609  |
| H | -1.994876 | 4.388651  | 2.351869  |
| H | -0.398581 | 5.109162  | 2.083877  |
| H | -1.658604 | 5.278181  | 0.840491  |
| C | -0.079586 | 1.951952  | -2.582636 |
| H | 0.187436  | 0.941382  | -2.916794 |
| H | -1.042750 | 2.232252  | -3.035763 |
| H | 0.676629  | 2.660269  | -2.957012 |
| C | -5.285244 | -2.198687 | 2.910713  |
| H | -4.497570 | -2.918077 | 3.174080  |
| H | -5.436283 | -1.526277 | 3.770207  |
| H | -6.224428 | -2.756661 | 2.768374  |
| C | -6.470318 | 1.335459  | -0.521081 |
| H | -6.014251 | 1.949340  | -1.310117 |
| H | -7.364633 | 0.850167  | -0.945279 |
| H | -6.815398 | 2.004048  | 0.282513  |

**J: adduct**

|                                              |                             |
|----------------------------------------------|-----------------------------|
| Zero-point correction=                       | 0.410564 (Hartree/Particle) |
| Thermal correction to Energy=                | 0.443278                    |
| Thermal correction to Enthalpy=              | 0.444222                    |
| Thermal correction to Gibbs Free Energy=     | 0.337933                    |
| Sum of electronic and zero-point Energies=   | -1215.802269                |
| Sum of electronic and thermal Energies=      | -1215.769554                |
| Sum of electronic and thermal Enthalpies=    | -1215.768610                |
| Sum of electronic and thermal Free Energies= | -1215.874900                |
| E(RB-P86) =                                  | -1216.21283262 A.U          |

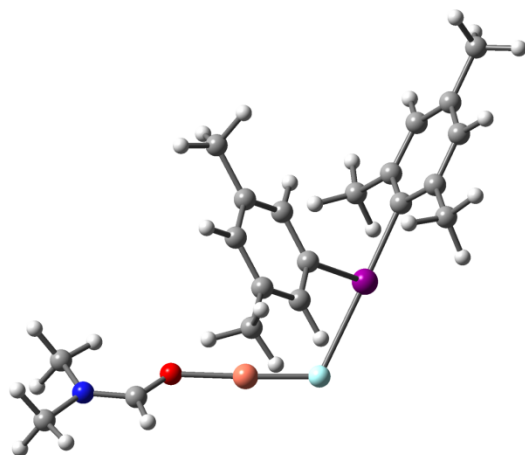

|   |           |           |           |
|---|-----------|-----------|-----------|
| C | -3.080393 | -0.536047 | 0.015951  |
| C | -3.454242 | -1.218483 | 1.191096  |
| C | -3.919791 | 0.383619  | -0.648451 |
| C | -4.727703 | -0.931229 | 1.710694  |
| C | -5.174507 | 0.626999  | -0.071795 |

|    |           |           |           |
|----|-----------|-----------|-----------|
| C  | -5.595675 | -0.014270 | 1.103471  |
| H  | -5.045096 | -1.448325 | 2.620696  |
| H  | -5.843656 | 1.338428  | -0.564585 |
| I  | -1.173740 | -1.002739 | -0.839779 |
| C  | -0.231114 | 0.878213  | -0.400749 |
| C  | 0.611944  | 1.413838  | -1.373467 |
| C  | -0.490224 | 1.485557  | 0.820905  |
| C  | 1.242501  | 2.639359  | -1.101164 |
| H  | 0.783656  | 0.898597  | -2.318955 |
| C  | 0.133443  | 2.719831  | 1.094938  |
| H  | -1.158834 | 1.034730  | 1.556822  |
| C  | 0.990994  | 3.267929  | 0.131161  |
| H  | 1.480020  | 4.223107  | 0.345792  |
| Cu | 2.578702  | -1.314091 | -0.695788 |
| F  | 1.161621  | -1.587314 | -1.826404 |
| C  | 5.053848  | -0.492548 | 0.311309  |
| H  | 5.289607  | -0.054877 | -0.669930 |
| O  | 3.959756  | -1.099539 | 0.530930  |
| N  | 5.993421  | -0.341514 | 1.240307  |
| C  | 5.827881  | -0.864312 | 2.598167  |
| H  | 5.893904  | -0.036185 | 3.319001  |
| H  | 4.851352  | -1.351813 | 2.679879  |
| H  | 6.626858  | -1.589208 | 2.812439  |
| C  | 7.244819  | 0.355595  | 0.938703  |
| H  | 7.356503  | 1.222521  | 1.606171  |
| H  | 8.095343  | -0.325129 | 1.090227  |
| H  | 7.236786  | 0.698970  | -0.102865 |
| C  | -3.525677 | 1.099517  | -1.916033 |
| H  | -2.657413 | 1.758765  | -1.755588 |
| H  | -3.254216 | 0.390367  | -2.714183 |
| H  | -4.355607 | 1.719424  | -2.279897 |
| C  | -2.579904 | -2.232433 | 1.891253  |
| H  | -2.410038 | -3.123192 | 1.265535  |
| H  | -1.591579 | -1.819646 | 2.146092  |
| H  | -3.057290 | -2.565432 | 2.822333  |
| C  | -6.946830 | 0.290548  | 1.702021  |
| H  | -7.727400 | 0.325937  | 0.927113  |
| H  | -7.232923 | -0.459226 | 2.452507  |
| H  | -6.938712 | 1.275805  | 2.197351  |
| C  | -0.138037 | 3.430291  | 2.399835  |
| H  | 0.621082  | 4.199693  | 2.597790  |
| H  | -1.121824 | 3.927456  | 2.375097  |
| H  | -0.150242 | 2.726044  | 3.244906  |
| C  | 2.163571  | 3.270356  | -2.118169 |
| H  | 1.801680  | 4.268828  | -2.410251 |
| H  | 3.175207  | 3.401769  | -1.702574 |
| H  | 2.242681  | 2.655133  | -3.024779 |

**J: TS**

Zero-point correction=

0.409007 (Hartree/Particle)

Thermal correction to Energy=

0.441281



Thermal correction to Enthalpy= 0.442226  
 Thermal correction to Gibbs Free Energy= 0.338584  
 Sum of electronic and zero-point Energies= -1215.785545  
 Sum of electronic and thermal Energies= -1215.753271  
 Sum of electronic and thermal Enthalpies= -1215.752327  
 Sum of electronic and thermal Free Energies= -1215.855969  
 E(RB-P86) = -1216.19455266 A.U

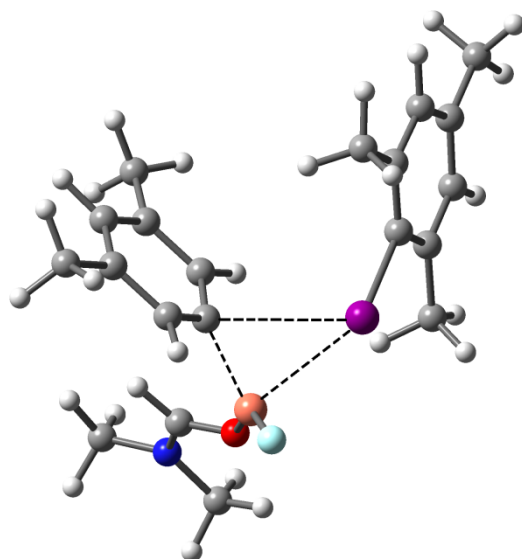

|    |           |           |           |
|----|-----------|-----------|-----------|
| C  | -2.531791 | -0.377532 | -0.352567 |
| C  | -2.580639 | -1.779764 | -0.186620 |
| C  | -3.410058 | 0.507475  | 0.316893  |
| C  | -3.564623 | -2.285847 | 0.676562  |
| C  | -4.368426 | -0.065626 | 1.162034  |
| C  | -4.464640 | -1.453849 | 1.357173  |
| H  | -3.626319 | -3.368930 | 0.815821  |
| H  | -5.063158 | 0.598323  | 1.684869  |
| I  | -1.101150 | 0.435552  | -1.682138 |
| C  | 1.175198  | 1.179923  | 0.171109  |
| C  | 1.506651  | 2.513947  | 0.009218  |
| C  | 0.810417  | 0.569732  | 1.359077  |
| C  | 1.625587  | 3.284717  | 1.188573  |
| H  | 1.703294  | 2.947591  | -0.971059 |
| C  | 0.925356  | 1.344626  | 2.535506  |
| H  | 0.461538  | -0.462683 | 1.411014  |
| C  | 1.323429  | 2.685478  | 2.420792  |
| H  | 1.378050  | 3.294679  | 3.327793  |
| Cu | 1.743139  | 0.070291  | -1.324033 |
| F  | 1.587770  | 1.216470  | -2.782713 |
| C  | 3.258202  | -1.581803 | 0.467400  |
| H  | 3.339717  | -0.733510 | 1.164364  |
| O  | 2.513843  | -1.513537 | -0.562599 |
| N  | 3.965138  | -2.656326 | 0.781193  |
| C  | 3.963691  | -3.857819 | -0.058824 |

|   |           |           |           |
|---|-----------|-----------|-----------|
| H | 3.577624  | -4.708258 | 0.521344  |
| H | 3.331779  | -3.686320 | -0.935651 |
| H | 4.992970  | -4.078088 | -0.376281 |
| C | 4.792473  | -2.684985 | 1.990985  |
| H | 4.460482  | -3.504817 | 2.643854  |
| H | 5.843939  | -2.847748 | 1.714399  |
| H | 4.698973  | -1.732647 | 2.525846  |
| C | -3.359030 | 2.005448  | 0.151759  |
| H | -2.376784 | 2.410962  | 0.441295  |
| H | -3.535329 | 2.302782  | -0.894360 |
| H | -4.124652 | 2.485511  | 0.775726  |
| C | -1.646407 | -2.729762 | -0.891825 |
| H | -1.755830 | -2.663452 | -1.986191 |
| H | -0.593070 | -2.506944 | -0.660158 |
| H | -1.851998 | -3.765353 | -0.589878 |
| C | -5.505500 | -2.026583 | 2.285686  |
| H | -6.510435 | -1.654036 | 2.031948  |
| H | -5.522021 | -3.124294 | 2.244763  |
| H | -5.307775 | -1.727086 | 3.328195  |
| C | 0.620370  | 0.724893  | 3.878336  |
| H | 1.540795  | 0.334668  | 4.343101  |
| H | 0.194654  | 1.471017  | 4.564909  |
| H | -0.086091 | -0.111554 | 3.786072  |
| C | 2.076057  | 4.723183  | 1.098712  |
| H | 1.653793  | 5.317584  | 1.921802  |
| H | 3.174286  | 4.790224  | 1.169211  |
| H | 1.776951  | 5.178942  | 0.144481  |

**K, L: adducts**

|                                              |                             |
|----------------------------------------------|-----------------------------|
| Zero-point correction=                       | 0.310785 (Hartree/Particle) |
| Thermal correction to Energy=                | 0.337482                    |
| Thermal correction to Enthalpy=              | 0.338426                    |
| Thermal correction to Gibbs Free Energy=     | 0.247788                    |
| Sum of electronic and zero-point Energies=   | -1067.347265                |
| Sum of electronic and thermal Energies=      | -1067.320568                |
| Sum of electronic and thermal Enthalpies=    | -1067.319624                |
| Sum of electronic and thermal Free Energies= | -1067.410262                |
| E(RB-P86) =                                  | -1067.65805016 A.U          |

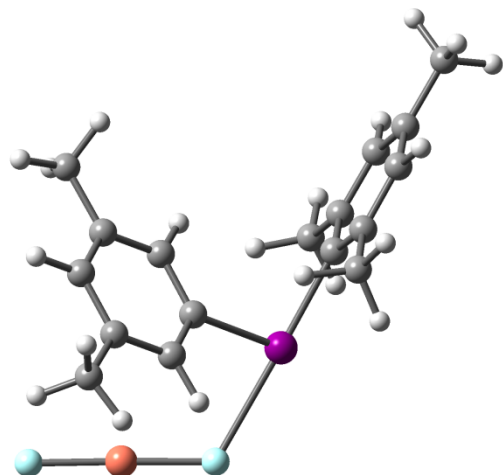

|    |           |           |           |
|----|-----------|-----------|-----------|
| C  | -2.283237 | -0.491433 | -0.168605 |
| C  | -2.992267 | -0.873536 | 0.990258  |
| C  | -2.840873 | 0.310756  | -1.184169 |
| C  | -4.307425 | -0.401139 | 1.114458  |
| C  | -4.159985 | 0.754027  | -0.993444 |
| C  | -4.907469 | 0.412224  | 0.141212  |
| H  | -4.877011 | -0.681676 | 2.005414  |
| H  | -4.612314 | 1.385063  | -1.763961 |
| I  | -0.280773 | -1.227308 | -0.412499 |
| C  | 0.693172  | 0.658833  | -0.112877 |
| C  | 1.653729  | 1.045696  | -1.047916 |
| C  | 0.339143  | 1.421961  | 0.991590  |
| C  | 2.302395  | 2.277330  | -0.862966 |
| H  | 1.896765  | 0.413668  | -1.902432 |
| C  | 0.985074  | 2.661035  | 1.181163  |
| H  | -0.416783 | 1.087103  | 1.704278  |
| C  | 1.953073  | 3.061993  | 0.250999  |
| H  | 2.456476  | 4.022391  | 0.397689  |
| Cu | 3.472059  | -1.314535 | 0.325000  |
| F  | 4.811421  | -0.633359 | 1.339903  |
| F  | 2.128610  | -2.041462 | -0.706585 |
| C  | -2.094201 | 0.708379  | -2.433092 |
| H  | -1.199291 | 1.307004  | -2.199568 |
| H  | -1.757606 | -0.173960 | -3.000734 |
| H  | -2.737774 | 1.308442  | -3.089993 |
| C  | -2.419689 | -1.760248 | 2.071886  |
| H  | -2.215692 | -2.776528 | 1.698252  |
| H  | -1.473541 | -1.366696 | 2.474272  |
| H  | -3.129522 | -1.848668 | 2.905119  |
| C  | -6.329053 | 0.890186  | 0.310273  |
| H  | -7.037112 | 0.049798  | 0.222225  |
| H  | -6.482346 | 1.336611  | 1.304927  |
| H  | -6.595118 | 1.637164  | -0.450277 |
| C  | 3.350452  | 2.748907  | -1.842360 |
| H  | 3.093081  | 3.739872  | -2.248034 |
| H  | 4.330825  | 2.844930  | -1.348778 |

|   |           |          |           |
|---|-----------|----------|-----------|
| H | 3.459449  | 2.049910 | -2.682866 |
| C | 0.629573  | 3.521326 | 2.370624  |
| H | 1.270830  | 4.411947 | 2.421809  |
| H | -0.418571 | 3.856700 | 2.315936  |
| H | 0.741767  | 2.961383 | 3.312090  |

|                                              |                             |
|----------------------------------------------|-----------------------------|
| Zero-point correction=                       | 0.310911 (Hartree/Particle) |
| Thermal correction to Energy=                | 0.337522                    |
| Thermal correction to Enthalpy=              | 0.338466                    |
| Thermal correction to Gibbs Free Energy=     | 0.248289                    |
| Sum of electronic and zero-point Energies=   | -1067.348240                |
| Sum of electronic and thermal Energies=      | -1067.321629                |
| Sum of electronic and thermal Enthalpies=    | -1067.320685                |
| Sum of electronic and thermal Free Energies= | -1067.410862                |
| E(RB-P86) =                                  | -1067.65915115 A.U.         |

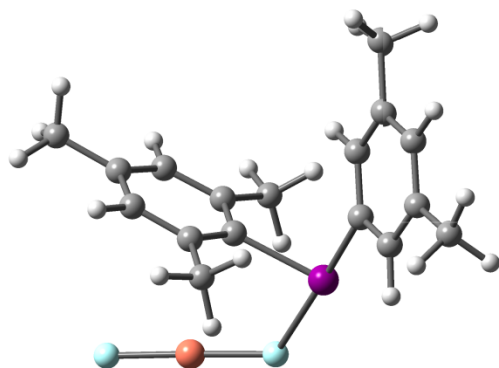

|    |           |           |           |
|----|-----------|-----------|-----------|
| C  | 2.350584  | -0.391590 | -0.166783 |
| C  | 2.662549  | 0.787433  | -0.848754 |
| C  | 3.279309  | -1.077497 | 0.612489  |
| C  | 3.959768  | 1.310650  | -0.740683 |
| H  | 1.916628  | 1.307749  | -1.453020 |
| C  | 4.591067  | -0.570563 | 0.715963  |
| H  | 3.005356  | -1.991321 | 1.145644  |
| C  | 4.903243  | 0.615301  | 0.039332  |
| H  | 5.917544  | 1.017974  | 0.122024  |
| I  | 0.392079  | -1.261801 | -0.352746 |
| C  | -0.687126 | 0.545057  | 0.022142  |
| C  | -0.681857 | 1.060658  | 1.330634  |
| C  | -1.359058 | 1.137261  | -1.063364 |
| C  | -1.379887 | 2.263878  | 1.524953  |
| C  | -2.041415 | 2.333769  | -0.790611 |
| C  | -2.057542 | 2.915245  | 0.485073  |
| H  | -1.397453 | 2.693031  | 2.530789  |
| H  | -2.581839 | 2.817244  | -1.609402 |
| Cu | -3.448697 | -1.333458 | 0.073391  |
| F  | -4.945864 | -0.476958 | 0.632233  |
| F  | -1.952593 | -2.241136 | -0.506682 |
| C  | -1.401501 | 0.546599  | -2.451019 |
| H  | -2.046996 | 1.151337  | -3.101470 |

|   |           |           |           |
|---|-----------|-----------|-----------|
| H | -0.400941 | 0.506161  | -2.910606 |
| H | -1.798028 | -0.480547 | -2.428517 |
| C | 0.012594  | 0.398380  | 2.493103  |
| H | 1.101574  | 0.340439  | 2.336410  |
| H | -0.165369 | 0.965072  | 3.416419  |
| H | -0.352753 | -0.629251 | 2.648088  |
| C | -2.779071 | 4.217710  | 0.729875  |
| H | -3.120083 | 4.297371  | 1.771909  |
| H | -2.110635 | 5.073416  | 0.535239  |
| H | -3.649080 | 4.324092  | 0.066160  |
| C | 5.621213  | -1.296019 | 1.548994  |
| H | 6.572385  | -0.746485 | 1.571502  |
| H | 5.273694  | -1.424843 | 2.586124  |
| H | 5.817225  | -2.302652 | 1.146269  |
| C | 4.339859  | 2.589452  | -1.448830 |
| H | 4.641456  | 3.363788  | -0.725373 |
| H | 5.195096  | 2.427150  | -2.123630 |
| H | 3.503986  | 2.984503  | -2.042427 |

### K, L: TS's

|                                              |                             |
|----------------------------------------------|-----------------------------|
| Zero-point correction=                       | 0.309019 (Hartree/Particle) |
| Thermal correction to Energy=                | 0.335342                    |
| Thermal correction to Enthalpy=              | 0.336286                    |
| Thermal correction to Gibbs Free Energy=     | 0.247534                    |
| Sum of electronic and zero-point Energies=   | -1067.335500                |
| Sum of electronic and thermal Energies=      | -1067.309177                |
| Sum of electronic and thermal Enthalpies=    | -1067.308233                |
| Sum of electronic and thermal Free Energies= | -1067.396985                |
| E(RB-P86) =                                  | -1067.64451903 A.U.         |

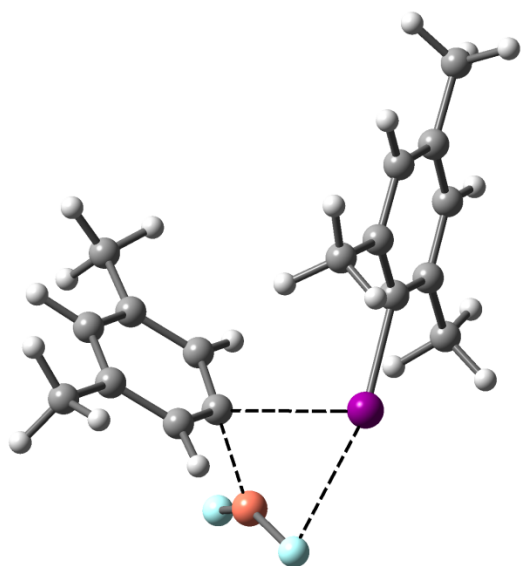

|   |           |           |           |
|---|-----------|-----------|-----------|
| C | -2.024082 | -0.397913 | -0.344826 |
| C | -2.766342 | -0.902683 | 0.745375  |
| C | -2.466279 | 0.686244  | -1.137920 |

|    |           |           |           |
|----|-----------|-----------|-----------|
| C  | -3.997363 | -0.286413 | 1.019342  |
| C  | -3.703521 | 1.255791  | -0.808446 |
| C  | -4.484497 | 0.786254  | 0.259634  |
| H  | -4.591056 | -0.663340 | 1.857150  |
| H  | -4.066159 | 2.095881  | -1.408007 |
| I  | -0.174870 | -1.317627 | -0.832782 |
| C  | 1.551152  | 0.417571  | 0.155246  |
| C  | 2.297795  | 1.007742  | -0.862837 |
| C  | 0.965076  | 1.115070  | 1.207310  |
| C  | 2.600464  | 2.378383  | -0.739376 |
| H  | 2.667661  | 0.421733  | -1.704620 |
| C  | 1.267217  | 2.485995  | 1.327859  |
| H  | 0.332406  | 0.625021  | 1.948044  |
| C  | 2.070574  | 3.092073  | 0.347717  |
| H  | 2.277058  | 4.163597  | 0.425441  |
| Cu | 2.365956  | -1.346656 | 0.632749  |
| F  | 2.615173  | -1.397192 | 2.463290  |
| F  | 2.529276  | -2.043709 | -1.113707 |
| C  | -2.309632 | -2.059838 | 1.599837  |
| H  | -2.197921 | -2.980912 | 1.005756  |
| H  | -1.334596 | -1.860143 | 2.070814  |
| H  | -3.039350 | -2.256055 | 2.396769  |
| C  | -1.677858 | 1.235475  | -2.300819 |
| H  | -0.682300 | 1.586840  | -1.987814 |
| H  | -1.521256 | 0.470826  | -3.078691 |
| H  | -2.208312 | 2.081441  | -2.758278 |
| C  | -5.822618 | 1.411604  | 0.566025  |
| H  | -6.585242 | 1.068212  | -0.153280 |
| H  | -6.171449 | 1.144898  | 1.573550  |
| H  | -5.778064 | 2.508406  | 0.488834  |
| C  | 3.474850  | 3.054335  | -1.769184 |
| H  | 3.201004  | 4.113194  | -1.884149 |
| H  | 4.534001  | 3.017231  | -1.464511 |
| H  | 3.395444  | 2.562745  | -2.749103 |
| C  | 0.740198  | 3.273386  | 2.504350  |
| H  | 1.457675  | 3.247351  | 3.341305  |
| H  | 0.585556  | 4.328306  | 2.234885  |
| H  | -0.210574 | 2.861698  | 2.871656  |

|                                              |                             |
|----------------------------------------------|-----------------------------|
| Zero-point correction=                       | 0.308958 (Hartree/Particle) |
| Thermal correction to Energy=                | 0.335360                    |
| Thermal correction to Enthalpy=              | 0.336304                    |
| Thermal correction to Gibbs Free Energy=     | 0.246679                    |
| Sum of electronic and zero-point Energies=   | -1067.334156                |
| Sum of electronic and thermal Energies=      | -1067.307754                |
| Sum of electronic and thermal Enthalpies=    | -1067.306810                |
| Sum of electronic and thermal Free Energies= | -1067.396435                |
| E(RB-P86) =                                  | -1067.64311362 A.U.         |

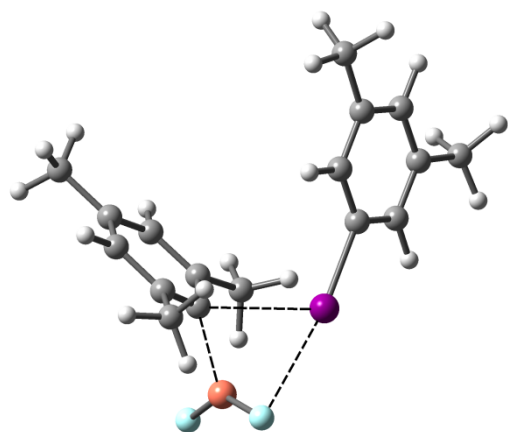

|    |           |           |           |
|----|-----------|-----------|-----------|
| C  | -2.118574 | -0.561155 | -0.292181 |
| C  | -2.852041 | -1.006884 | 0.813873  |
| C  | -2.588840 | 0.459186  | -1.127884 |
| C  | -4.098199 | -0.422721 | 1.095070  |
| H  | -2.469684 | -1.808347 | 1.449697  |
| C  | -3.833181 | 1.050932  | -0.859101 |
| H  | -2.002308 | 0.791359  | -1.986922 |
| C  | -4.566270 | 0.598304  | 0.251313  |
| H  | -5.537259 | 1.056350  | 0.465556  |
| I  | -0.252768 | -1.461342 | -0.728647 |
| C  | 1.619382  | 0.560339  | 0.147011  |
| C  | 2.019210  | 1.243350  | -1.004750 |
| C  | 1.076506  | 1.136398  | 1.303248  |
| C  | 2.060037  | 2.649172  | -0.874259 |
| C  | 1.137310  | 2.541586  | 1.347803  |
| C  | 1.628493  | 3.310460  | 0.280640  |
| H  | 2.426117  | 3.224511  | -1.730474 |
| H  | 0.781605  | 3.035162  | 2.257609  |
| Cu | 2.568316  | -1.166901 | 0.439367  |
| F  | 3.375853  | -0.915645 | 2.078284  |
| F  | 2.415970  | -2.252682 | -1.073677 |
| C  | 2.387819  | 0.604120  | -2.319482 |
| H  | 3.078772  | 1.249194  | -2.879467 |
| H  | 2.835182  | -0.388999 | -2.180529 |
| H  | 1.481868  | 0.468708  | -2.934356 |
| C  | 0.531728  | 0.356468  | 2.470702  |
| H  | 0.242748  | 1.035034  | 3.284324  |
| H  | -0.356543 | -0.226883 | 2.181468  |
| H  | 1.294242  | -0.345074 | 2.842235  |
| C  | 1.682532  | 4.816266  | 0.377874  |
| H  | 1.688412  | 5.283339  | -0.617073 |
| H  | 0.828599  | 5.212870  | 0.946331  |
| H  | 2.599597  | 5.137792  | 0.900057  |
| C  | -4.374842 | 2.147873  | -1.745619 |
| H  | -5.334444 | 1.850946  | -2.197985 |
| H  | -4.560880 | 3.066524  | -1.166917 |
| H  | -3.674965 | 2.390146  | -2.557063 |

|   |           |           |          |
|---|-----------|-----------|----------|
| C | -4.906491 | -0.867189 | 2.291434 |
| H | -4.852815 | -0.117526 | 3.098201 |
| H | -5.968797 | -0.987660 | 2.030778 |
| H | -4.537768 | -1.820301 | 2.695535 |

### Reactions of [2,6-Me<sub>2</sub>C<sub>6</sub>H<sub>4</sub>(Ph)I]BF<sub>4</sub>

#### H, I: adducts

|                                              |                             |
|----------------------------------------------|-----------------------------|
| Zero-point correction=                       | 0.336632 (Hartree/Particle) |
| Thermal correction to Energy=                | 0.370200                    |
| Thermal correction to Enthalpy=              | 0.371144                    |
| Thermal correction to Gibbs Free Energy=     | 0.264820                    |
| Sum of electronic and zero-point Energies=   | -1929.177522                |
| Sum of electronic and thermal Energies=      | -1929.143954                |
| Sum of electronic and thermal Enthalpies=    | -1929.143010                |
| Sum of electronic and thermal Free Energies= | -1929.249334                |
| E(RB-P86) =                                  | -1929.51415374 A.U.         |

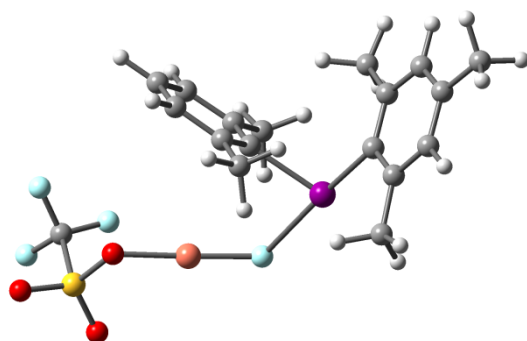

|    |           |           |           |
|----|-----------|-----------|-----------|
| C  | 3.775902  | -0.268949 | -0.221764 |
| C  | 4.345432  | 0.960791  | -0.609681 |
| C  | 4.494698  | -1.270929 | 0.461733  |
| C  | 5.682123  | 1.184870  | -0.245771 |
| C  | 5.831035  | -0.983229 | 0.786574  |
| C  | 6.440108  | 0.232807  | 0.451240  |
| H  | 6.141499  | 2.137434  | -0.525775 |
| H  | 6.408084  | -1.743766 | 1.320577  |
| I  | 1.744922  | -0.744975 | -0.771204 |
| C  | 0.695510  | 0.855664  | 0.221737  |
| C  | 0.763149  | 0.927335  | 1.624995  |
| C  | -0.029503 | 1.744690  | -0.596313 |
| C  | 0.072480  | 1.997618  | 2.223006  |
| C  | -0.704910 | 2.783229  | 0.070118  |
| C  | -0.646965 | 2.915401  | 1.457922  |
| H  | 0.101966  | 2.091915  | 3.311071  |
| H  | -1.281205 | 3.494557  | -0.526077 |
| Cu | -2.061631 | -1.036652 | -0.229904 |
| F  | -0.686554 | -1.480068 | -1.361796 |
| C  | -5.373029 | 0.708821  | -0.307092 |
| S  | -4.884334 | -0.828786 | 0.683356  |
| F  | -5.199112 | 1.827156  | 0.429130  |
| F  | -6.673477 | 0.629299  | -0.665545 |



|   |           |           |           |
|---|-----------|-----------|-----------|
| F | -4.625936 | 0.813909  | -1.428764 |
| O | -5.109155 | -1.949790 | -0.238628 |
| O | -5.697028 | -0.752337 | 1.901502  |
| O | -3.413118 | -0.555836 | 0.990461  |
| C | 1.505432  | -0.056995 | 2.490093  |
| H | 1.188532  | -1.091145 | 2.281966  |
| H | 2.593675  | 0.000117  | 2.328871  |
| H | 1.312124  | 0.147962  | 3.551072  |
| C | -0.135826 | 1.626196  | -2.094973 |
| H | 0.847467  | 1.716653  | -2.583175 |
| H | -0.561496 | 0.651454  | -2.379098 |
| H | -0.782938 | 2.419253  | -2.491749 |
| H | -1.176781 | 3.734820  | 1.948538  |
| C | 3.601869  | 2.015431  | -1.388126 |
| H | 3.225288  | 1.612092  | -2.342147 |
| H | 2.739177  | 2.406142  | -0.826620 |
| H | 4.263618  | 2.860410  | -1.619213 |
| C | 3.921956  | -2.619100 | 0.830979  |
| H | 3.010609  | -2.529920 | 1.442002  |
| H | 3.661534  | -3.208763 | -0.062743 |
| H | 4.657146  | -3.197798 | 1.405695  |
| C | 7.882931  | 0.502367  | 0.801719  |
| H | 8.234152  | -0.166956 | 1.599475  |
| H | 8.532041  | 0.344669  | -0.075930 |
| H | 8.027056  | 1.542957  | 1.128313  |

|                                              |                             |
|----------------------------------------------|-----------------------------|
| Zero-point correction=                       | 0.336520 (Hartree/Particle) |
| Thermal correction to Energy=                | 0.370149                    |
| Thermal correction to Enthalpy=              | 0.371093                    |
| Thermal correction to Gibbs Free Energy=     | 0.264553                    |
| Sum of electronic and zero-point Energies=   | -1929.177727                |
| Sum of electronic and thermal Energies=      | -1929.144099                |
| Sum of electronic and thermal Enthalpies=    | -1929.143154                |
| Sum of electronic and thermal Free Energies= | -1929.249695                |
| E(RB-P86) =                                  | -1929.51424737 A.U.         |

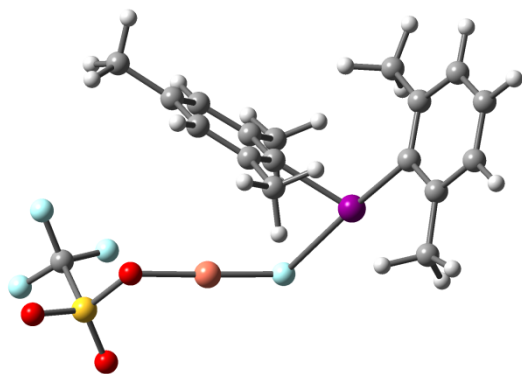

|   |          |           |           |
|---|----------|-----------|-----------|
| C | 4.044736 | -0.289834 | -0.065658 |
| C | 4.600142 | 0.867145  | -0.647077 |
| C | 4.738183 | -1.124389 | 0.836407  |

|    |           |           |           |
|----|-----------|-----------|-----------|
| C  | 5.904861  | 1.210267  | -0.250228 |
| C  | 6.042612  | -0.732128 | 1.185198  |
| C  | 6.616227  | 0.425513  | 0.658049  |
| H  | 6.362015  | 2.106993  | -0.675697 |
| H  | 6.607466  | -1.355764 | 1.882366  |
| H  | 7.629161  | 0.712427  | 0.949190  |
| I  | 2.052498  | -0.927713 | -0.615914 |
| C  | 0.922691  | 0.801135  | -0.019289 |
| C  | 0.905422  | 1.154719  | 1.341897  |
| C  | 0.213290  | 1.484786  | -1.026388 |
| C  | 0.149470  | 2.290058  | 1.678392  |
| C  | -0.528888 | 2.602044  | -0.610033 |
| C  | -0.564717 | 3.027680  | 0.725084  |
| H  | 0.114851  | 2.591438  | 2.729166  |
| H  | -1.097205 | 3.151629  | -1.365785 |
| Cu | -1.704640 | -1.168974 | -0.110537 |
| F  | -0.339259 | -1.846872 | -1.135828 |
| C  | -5.122850 | 0.263349  | -0.545648 |
| S  | -4.512426 | -0.871792 | 0.841008  |
| F  | -4.982856 | 1.560432  | -0.198112 |
| F  | -6.429732 | 0.024558  | -0.792946 |
| F  | -4.425900 | 0.047259  | -1.683773 |
| O  | -4.694593 | -2.230731 | 0.314607  |
| O  | -5.293153 | -0.467235 | 2.014576  |
| O  | -3.053222 | -0.445088 | 0.984567  |
| C  | 1.621124  | 0.389017  | 2.423872  |
| H  | 1.319438  | -0.670617 | 2.429272  |
| H  | 2.713907  | 0.425883  | 2.293542  |
| H  | 1.385796  | 0.811489  | 3.409258  |
| C  | 0.184719  | 1.065928  | -2.474052 |
| H  | 1.191614  | 1.067495  | -2.920504 |
| H  | -0.220952 | 0.047132  | -2.574444 |
| H  | -0.444202 | 1.752449  | -3.055640 |
| C  | -1.343528 | 4.257171  | 1.122868  |
| H  | -0.713826 | 5.158412  | 1.032835  |
| H  | -2.219365 | 4.403223  | 0.474807  |
| H  | -1.683852 | 4.196768  | 2.166397  |
| C  | 3.885378  | 1.721436  | -1.661878 |
| H  | 3.576100  | 1.125647  | -2.535775 |
| H  | 2.982426  | 2.191164  | -1.242086 |
| H  | 4.544699  | 2.523056  | -2.019906 |
| C  | 4.172112  | -2.400786 | 1.412409  |
| H  | 3.234862  | -2.227085 | 1.963501  |
| H  | 3.958044  | -3.143428 | 0.627160  |
| H  | 4.891575  | -2.853225 | 2.107597  |

#### H, I: TS's

|                                          |                             |
|------------------------------------------|-----------------------------|
| Zero-point correction=                   | 0.334400 (Hartree/Particle) |
| Thermal correction to Energy=            | 0.367814                    |
| Thermal correction to Enthalpy=          | 0.368759                    |
| Thermal correction to Gibbs Free Energy= | 0.263249                    |

Sum of electronic and zero-point Energies= -1929.160402  
 Sum of electronic and thermal Energies= -1929.126988  
 Sum of electronic and thermal Enthalpies= -1929.126044  
 Sum of electronic and thermal Free Energies= -1929.231553  
 E(RB-P86) = -1929.49480235 A.U.

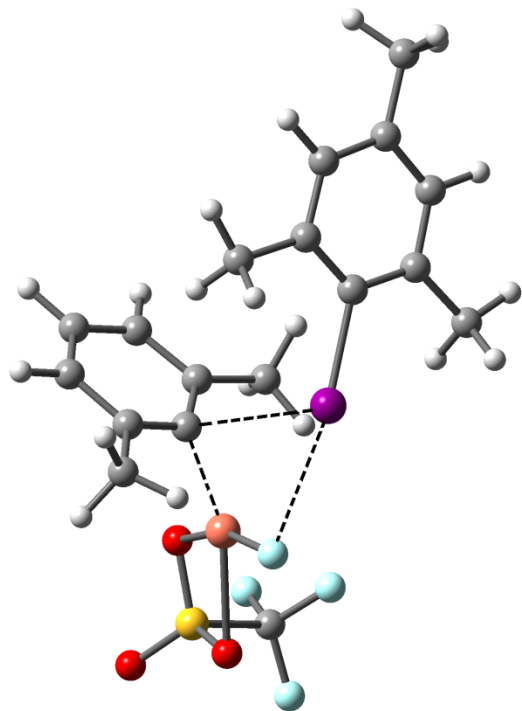

|    |           |           |           |
|----|-----------|-----------|-----------|
| C  | -3.297991 | -0.568983 | -0.399190 |
| C  | -3.566687 | -1.924306 | -0.098433 |
| C  | -4.159035 | 0.479374  | 0.000872  |
| C  | -4.739240 | -2.205971 | 0.619059  |
| C  | -5.313110 | 0.130172  | 0.716189  |
| C  | -5.623758 | -1.200548 | 1.035716  |
| H  | -4.964047 | -3.249622 | 0.858312  |
| H  | -5.988970 | 0.929141  | 1.035663  |
| I  | -1.545161 | -0.096664 | -1.494961 |
| C  | 0.224071  | 1.301450  | 0.482582  |
| C  | 0.032466  | 2.670706  | 0.278644  |
| C  | 0.000041  | 0.584002  | 1.660457  |
| C  | -0.265995 | 3.402186  | 1.449637  |
| C  | -0.298821 | 1.378250  | 2.786941  |
| C  | -0.429162 | 2.764523  | 2.680248  |
| H  | -0.383681 | 4.486154  | 1.362907  |
| H  | -0.439335 | 0.876954  | 3.748947  |
| Cu | 1.730196  | 0.593558  | -0.612358 |
| F  | 1.072418  | 0.612064  | -2.331026 |
| C  | 4.510432  | -1.815986 | 0.528275  |
| S  | 4.259102  | 0.029680  | 0.194233  |
| F  | 3.438006  | -2.515984 | 0.111621  |
| F  | 5.600889  | -2.251889 | -0.132194 |

|   |           |           |           |
|---|-----------|-----------|-----------|
| F | 4.684881  | -2.025657 | 1.847342  |
| O | 3.925864  | 0.120993  | -1.254581 |
| O | 5.477102  | 0.672684  | 0.677075  |
| O | 2.993538  | 0.360319  | 0.972665  |
| C | 0.089913  | -0.916333 | 1.786670  |
| H | -0.903110 | -1.337460 | 2.010310  |
| H | 0.457600  | -1.383030 | 0.863302  |
| H | 0.762033  | -1.197785 | 2.610356  |
| C | 0.155151  | 3.372516  | -1.052010 |
| H | 0.162664  | 2.653185  | -1.880442 |
| H | -0.678655 | 4.076960  | -1.186504 |
| H | 1.088530  | 3.957551  | -1.094718 |
| H | -0.685188 | 3.352889  | 3.564330  |
| C | -3.887608 | 1.929990  | -0.309226 |
| H | -2.946459 | 2.271795  | 0.150034  |
| H | -3.796969 | 2.098685  | -1.394192 |
| H | -4.701131 | 2.563326  | 0.069828  |
| C | -2.670727 | -3.059266 | -0.528171 |
| H | -2.607388 | -3.126660 | -1.626233 |
| H | -1.642100 | -2.930189 | -0.157054 |
| H | -3.054653 | -4.016324 | -0.149665 |
| C | -6.887535 | -1.539692 | 1.786625  |
| H | -6.801687 | -2.506457 | 2.302910  |
| H | -7.133141 | -0.765484 | 2.528455  |
| H | -7.744286 | -1.609813 | 1.094727  |

|                                              |                             |
|----------------------------------------------|-----------------------------|
| Zero-point correction=                       | 0.334366 (Hartree/Particle) |
| Thermal correction to Energy=                | 0.367792                    |
| Thermal correction to Enthalpy=              | 0.368736                    |
| Thermal correction to Gibbs Free Energy=     | 0.263152                    |
| Sum of electronic and zero-point Energies=   | -1929.160176                |
| Sum of electronic and thermal Energies=      | -1929.126751                |
| Sum of electronic and thermal Enthalpies=    | -1929.125806                |
| Sum of electronic and thermal Free Energies= | -1929.231391                |
| E(RB-P86) =                                  | -1929.49454272 A.U.         |

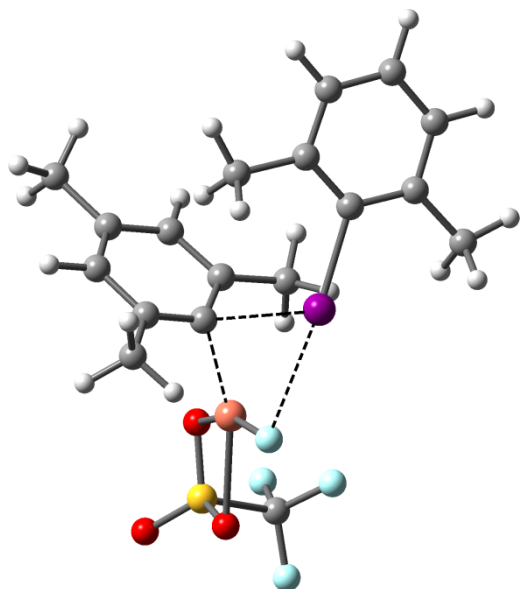

|    |           |           |           |
|----|-----------|-----------|-----------|
| C  | -3.555315 | -0.908597 | 0.126404  |
| C  | -3.826844 | -2.002544 | 0.980930  |
| C  | -4.401630 | 0.219990  | 0.034154  |
| C  | -4.996007 | -1.937601 | 1.757203  |
| C  | -5.555603 | 0.228017  | 0.835125  |
| C  | -5.851317 | -0.835829 | 1.690007  |
| H  | -5.231711 | -2.772805 | 2.421612  |
| H  | -6.227074 | 1.088683  | 0.780230  |
| H  | -6.753028 | -0.806567 | 2.306067  |
| I  | -1.814194 | -0.993442 | -1.093291 |
| C  | 0.007115  | 1.153008  | -0.135498 |
| C  | -0.241328 | 2.241377  | -0.974325 |
| C  | -0.128955 | 1.125060  | 1.259346  |
| C  | -0.454730 | 3.465607  | -0.303920 |
| C  | -0.359065 | 2.379824  | 1.850117  |
| C  | -0.517811 | 3.552926  | 1.091714  |
| H  | -0.597721 | 4.361904  | -0.916007 |
| H  | -0.419648 | 2.424135  | 2.942215  |
| Cu | 1.496426  | 0.040529  | -0.830136 |
| F  | 0.736182  | -0.870597 | -2.242732 |
| C  | 4.616009  | -1.335554 | 1.021594  |
| S  | 4.115867  | 0.095326  | -0.111875 |
| F  | 3.612138  | -2.227571 | 1.122924  |
| F  | 5.700826  | -1.955042 | 0.516213  |
| F  | 4.912276  | -0.868636 | 2.250336  |
| O  | 3.665883  | -0.554238 | -1.376303 |
| O  | 5.285181  | 0.968589  | -0.153809 |
| O  | 2.885175  | 0.677676  | 0.560794  |
| C  | 0.049759  | -0.105290 | 2.110516  |
| H  | -0.424754 | 0.031595  | 3.091325  |
| H  | -0.385215 | -0.990841 | 1.625912  |
| H  | 1.120142  | -0.307961 | 2.274058  |

|   |           |           |           |
|---|-----------|-----------|-----------|
| C | -0.768787 | 4.875124  | 1.775003  |
| H | -1.435863 | 4.757310  | 2.641647  |
| H | 0.177413  | 5.301230  | 2.149331  |
| H | -1.212974 | 5.606531  | 1.085835  |
| C | -0.270386 | 2.186655  | -2.482593 |
| H | -0.016529 | 1.186013  | -2.854154 |
| H | -1.274133 | 2.453567  | -2.849005 |
| H | 0.436286  | 2.916816  | -2.906244 |
| C | -4.121235 | 1.388541  | -0.876496 |
| H | -3.175570 | 1.888174  | -0.613075 |
| H | -4.035750 | 1.068694  | -1.927346 |
| H | -4.928156 | 2.130856  | -0.808642 |
| C | -2.944123 | -3.222285 | 1.074691  |
| H | -2.879795 | -3.749007 | 0.109076  |
| H | -1.914398 | -2.961403 | 1.365682  |
| H | -3.340654 | -3.925224 | 1.819896  |

### K, L: adducts

|                                              |                             |
|----------------------------------------------|-----------------------------|
| Zero-point correction=                       | 0.311466 (Hartree/Particle) |
| Thermal correction to Energy=                | 0.337570                    |
| Thermal correction to Enthalpy=              | 0.338515                    |
| Thermal correction to Gibbs Free Energy=     | 0.251370                    |
| Sum of electronic and zero-point Energies=   | -1067.342413                |
| Sum of electronic and thermal Energies=      | -1067.316309                |
| Sum of electronic and thermal Enthalpies=    | -1067.315364                |
| Sum of electronic and thermal Free Energies= | -1067.402509                |
| E(RB-P86) =                                  | -1067.65387889 A.U.         |

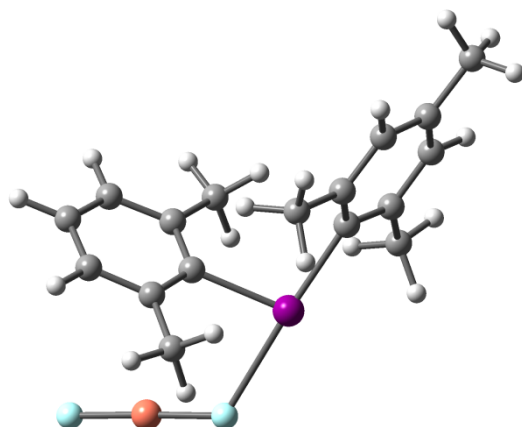

|   |           |           |           |
|---|-----------|-----------|-----------|
| C | -2.225649 | -0.328251 | -0.222393 |
| C | -2.934370 | -1.260670 | 0.563654  |
| C | -2.826558 | 0.813543  | -0.789732 |
| C | -4.293878 | -0.993247 | 0.796715  |
| C | -4.185548 | 1.024243  | -0.509223 |
| C | -4.935250 | 0.139209  | 0.278611  |
| H | -4.863334 | -1.701204 | 1.405914  |
| H | -4.669914 | 1.910112  | -0.930552 |
| I | -0.158412 | -0.791701 | -0.639579 |

|    |           |           |           |
|----|-----------|-----------|-----------|
| C  | 0.795469  | 0.959407  | 0.178742  |
| C  | 1.525248  | 1.763195  | -0.718426 |
| C  | 0.675292  | 1.201415  | 1.559193  |
| C  | 2.145685  | 2.897943  | -0.164958 |
| C  | 1.313765  | 2.358335  | 2.042292  |
| C  | 2.035659  | 3.197240  | 1.193329  |
| H  | 2.725113  | 3.547220  | -0.825617 |
| H  | 1.242650  | 2.584476  | 3.108866  |
| H  | 2.525436  | 4.086804  | 1.595503  |
| Cu | 3.662010  | -1.076069 | 0.044970  |
| F  | 5.052052  | -0.664125 | 1.132924  |
| F  | 2.275528  | -1.521802 | -1.078478 |
| C  | -2.093014 | 1.790168  | -1.672473 |
| H  | -1.281507 | 2.301123  | -1.131346 |
| H  | -1.645886 | 1.282463  | -2.542285 |
| H  | -2.780428 | 2.558379  | -2.050550 |
| C  | -2.325439 | -2.519235 | 1.136715  |
| H  | -2.003352 | -3.214150 | 0.344454  |
| H  | -1.445428 | -2.306534 | 1.763205  |
| H  | -3.061341 | -3.045707 | 1.758862  |
| C  | -6.402430 | 0.385589  | 0.532518  |
| H  | -7.007525 | 0.043417  | -0.323913 |
| H  | -6.752437 | -0.155870 | 1.422670  |
| H  | -6.610327 | 1.457055  | 0.669230  |
| C  | 1.694780  | 1.459724  | -2.184807 |
| H  | 0.730991  | 1.467764  | -2.718238 |
| H  | 2.344892  | 2.209952  | -2.653847 |
| H  | 2.146803  | 0.465699  | -2.324723 |
| C  | -0.061905 | 0.302472  | 2.516900  |
| H  | -1.135722 | 0.245116  | 2.279870  |
| H  | 0.343564  | -0.721798 | 2.492585  |
| H  | 0.035965  | 0.678674  | 3.543526  |

|                                              |                             |
|----------------------------------------------|-----------------------------|
| Zero-point correction=                       | 0.311739 (Hartree/Particle) |
| Thermal correction to Energy=                | 0.337701                    |
| Thermal correction to Enthalpy=              | 0.338645                    |
| Thermal correction to Gibbs Free Energy=     | 0.252537                    |
| Sum of electronic and zero-point Energies=   | -1067.342217                |
| Sum of electronic and thermal Energies=      | -1067.316255                |
| Sum of electronic and thermal Enthalpies=    | -1067.315311                |
| Sum of electronic and thermal Free Energies= | -1067.401419                |
| E(RB-P86) =                                  | -1067.65395649 A.U.         |

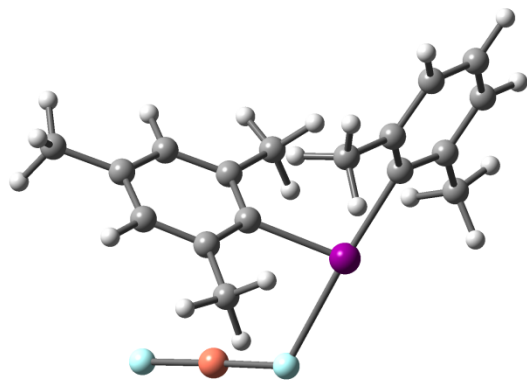

|    |           |           |           |
|----|-----------|-----------|-----------|
| C  | -2.603522 | -0.137987 | -0.068608 |
| C  | -3.358111 | -0.841556 | 0.894424  |
| C  | -3.086391 | 0.982809  | -0.773137 |
| C  | -4.647045 | -0.351048 | 1.169881  |
| C  | -4.379234 | 1.429017  | -0.446644 |
| C  | -5.149496 | 0.774142  | 0.515301  |
| H  | -5.257667 | -0.871311 | 1.911865  |
| H  | -4.779662 | 2.300534  | -0.970517 |
| I  | -0.647534 | -0.944993 | -0.532755 |
| C  | 0.582111  | 0.750476  | -0.046435 |
| C  | 1.344550  | 1.311468  | -1.089915 |
| C  | 0.600637  | 1.208150  | 1.282293  |
| C  | 2.143361  | 2.414097  | -0.748696 |
| C  | 1.417887  | 2.321552  | 1.544222  |
| C  | 2.189960  | 2.937496  | 0.551494  |
| H  | 2.749012  | 2.872236  | -1.535972 |
| H  | 1.449908  | 2.705949  | 2.567606  |
| Cu | 3.043336  | -1.698658 | 0.092640  |
| F  | 4.461062  | -1.345494 | 1.165620  |
| F  | 1.618865  | -2.088241 | -1.005271 |
| C  | -2.303431 | 1.696005  | -1.845057 |
| H  | -1.375405 | 2.136327  | -1.449025 |
| H  | -2.024998 | 1.006191  | -2.658163 |
| H  | -2.901845 | 2.506377  | -2.281467 |
| C  | -2.871772 | -2.079950 | 1.608959  |
| H  | -2.729206 | -2.922554 | 0.913335  |
| H  | -1.912040 | -1.912520 | 2.121150  |
| H  | -3.605843 | -2.394544 | 2.362597  |
| C  | 1.368430  | 0.779815  | -2.500118 |
| H  | 0.374947  | 0.829346  | -2.973515 |
| H  | 2.063955  | 1.366130  | -3.114861 |
| H  | 1.691282  | -0.272867 | -2.510301 |
| C  | -0.173548 | 0.573101  | 2.407832  |
| H  | -1.260938 | 0.648555  | 2.251210  |
| H  | 0.078144  | -0.494989 | 2.508367  |
| H  | 0.063915  | 1.066020  | 3.359495  |
| H  | -6.152278 | 1.138081  | 0.750196  |
| C  | 3.077964  | 4.114083  | 0.874905  |



|   |          |          |          |
|---|----------|----------|----------|
| H | 2.786172 | 4.589694 | 1.821514 |
| H | 4.128214 | 3.792096 | 0.971779 |
| H | 3.043465 | 4.870554 | 0.076799 |

**K, L: TS's**

|                                              |                             |
|----------------------------------------------|-----------------------------|
| Zero-point correction=                       | 0.309709 (Hartree/Particle) |
| Thermal correction to Energy=                | 0.335468                    |
| Thermal correction to Enthalpy=              | 0.336412                    |
| Thermal correction to Gibbs Free Energy=     | 0.251002                    |
| Sum of electronic and zero-point Energies=   | -1067.330952                |
| Sum of electronic and thermal Energies=      | -1067.305193                |
| Sum of electronic and thermal Enthalpies=    | -1067.304249                |
| Sum of electronic and thermal Free Energies= | -1067.389659                |
| E(RB-P86) =                                  | -1067.64066104 A.U.         |

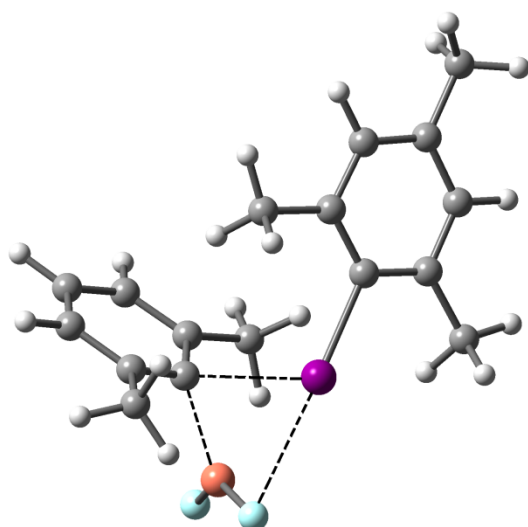

|    |           |           |           |
|----|-----------|-----------|-----------|
| C  | -2.016666 | -0.346483 | -0.329302 |
| C  | -2.806538 | -1.147602 | 0.526928  |
| C  | -2.475144 | 0.873587  | -0.873257 |
| C  | -4.097892 | -0.686188 | 0.821526  |
| C  | -3.773896 | 1.279105  | -0.533015 |
| C  | -4.598676 | 0.521020  | 0.311272  |
| H  | -4.731040 | -1.297165 | 1.471689  |
| H  | -4.149171 | 2.219787  | -0.946617 |
| I  | -0.073992 | -1.044341 | -0.839894 |
| C  | 1.598495  | 0.807634  | 0.227648  |
| C  | 2.147394  | 1.571940  | -0.814377 |
| C  | 1.058787  | 1.310396  | 1.424590  |
| C  | 2.332695  | 2.940261  | -0.517331 |
| C  | 1.263822  | 2.686312  | 1.640725  |
| C  | 1.895181  | 3.489289  | 0.686769  |
| H  | 2.810106  | 3.567975  | -1.274755 |
| H  | 0.914790  | 3.115656  | 2.583650  |
| Cu | 2.591407  | -0.923103 | 0.486671  |
| F  | 3.250300  | -0.868308 | 2.222044  |

|   |           |           |           |
|---|-----------|-----------|-----------|
| F | 2.593241  | -1.900764 | -1.126575 |
| C | 2.526582  | 1.042064  | -2.173824 |
| H | 3.370195  | 1.613821  | -2.585388 |
| H | 2.787152  | -0.024792 | -2.136858 |
| H | 1.678382  | 1.157680  | -2.870131 |
| C | 0.370932  | 0.467689  | 2.465406  |
| H | 0.146955  | 1.068113  | 3.357228  |
| H | -0.579672 | 0.062398  | 2.084814  |
| H | 1.015390  | -0.375182 | 2.759125  |
| C | -1.640945 | 1.733029  | -1.789344 |
| H | -0.713712 | 2.066349  | -1.296675 |
| H | -1.347919 | 1.184251  | -2.698908 |
| H | -2.202191 | 2.625789  | -2.096050 |
| C | -2.336930 | -2.459598 | 1.105972  |
| H | -2.132265 | -3.200799 | 0.317003  |
| H | -1.407394 | -2.340981 | 1.685258  |
| H | -3.102555 | -2.878151 | 1.772802  |
| C | -5.979155 | 1.003325  | 0.681693  |
| H | -6.408939 | 1.636498  | -0.107831 |
| H | -6.661647 | 0.161755  | 0.868858  |
| H | -5.943819 | 1.607549  | 1.604250  |
| H | 2.027964  | 4.556476  | 0.877781  |

|                                              |                             |
|----------------------------------------------|-----------------------------|
| Zero-point correction=                       | 0.309909 (Hartree/Particle) |
| Thermal correction to Energy=                | 0.335591                    |
| Thermal correction to Enthalpy=              | 0.336536                    |
| Thermal correction to Gibbs Free Energy=     | 0.251583                    |
| Sum of electronic and zero-point Energies=   | -1067.330579                |
| Sum of electronic and thermal Energies=      | -1067.304896                |
| Sum of electronic and thermal Enthalpies=    | -1067.303952                |
| Sum of electronic and thermal Free Energies= | -1067.388904                |
| E(RB-P86) =                                  | -1067.64048750 A.U.         |

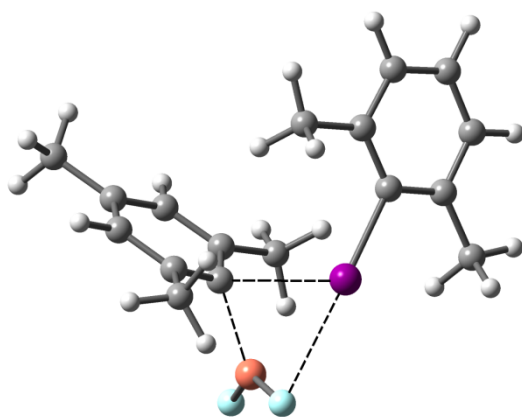

|   |           |           |           |
|---|-----------|-----------|-----------|
| C | -2.383911 | 0.193776  | -0.182991 |
| C | -3.279178 | -0.298988 | 0.794187  |
| C | -2.528600 | 1.454350  | -0.803642 |
| C | -4.359500 | 0.529158  | 1.142069  |
| C | -3.627419 | 2.236658  | -0.410614 |

|    |           |           |           |
|----|-----------|-----------|-----------|
| C  | -4.532115 | 1.782558  | 0.551223  |
| H  | -5.072398 | 0.174598  | 1.890618  |
| H  | -3.766153 | 3.217082  | -0.873053 |
| H  | -5.377795 | 2.409741  | 0.842421  |
| I  | -0.762286 | -1.060819 | -0.766328 |
| C  | 1.490410  | 0.258586  | 0.115293  |
| C  | 2.161727  | 0.771562  | -1.003739 |
| C  | 1.183582  | 0.973919  | 1.284997  |
| C  | 2.758136  | 2.036165  | -0.811110 |
| C  | 1.800128  | 2.232543  | 1.390844  |
| C  | 2.592884  | 2.774745  | 0.366029  |
| H  | 3.349308  | 2.447074  | -1.635374 |
| H  | 1.644649  | 2.797685  | 2.315046  |
| Cu | 1.870283  | -1.678086 | 0.437533  |
| F  | 2.545484  | -1.784769 | 2.165989  |
| F  | 1.541967  | -2.680389 | -1.127313 |
| C  | 2.277721  | 0.082228  | -2.338972 |
| H  | 3.190154  | 0.404359  | -2.859554 |
| H  | 2.275092  | -1.011565 | -2.231570 |
| H  | 1.418431  | 0.353972  | -2.975750 |
| C  | 0.323980  | 0.447382  | 2.403103  |
| H  | 0.377530  | 1.113789  | 3.274368  |
| H  | -0.731062 | 0.384516  | 2.092931  |
| H  | 0.660959  | -0.556470 | 2.702854  |
| C  | 3.241090  | 4.127592  | 0.531795  |
| H  | 3.510011  | 4.566744  | -0.439037 |
| H  | 2.578194  | 4.827059  | 1.062256  |
| H  | 4.166361  | 4.042715  | 1.126505  |
| C  | -1.577328 | 1.976223  | -1.850553 |
| H  | -0.547150 | 2.040962  | -1.466975 |
| H  | -1.554654 | 1.320502  | -2.735954 |
| H  | -1.881058 | 2.979466  | -2.178160 |
| C  | -3.135869 | -1.648749 | 1.453031  |
| H  | -3.190895 | -2.466904 | 0.717494  |
| H  | -2.170972 | -1.749082 | 1.975370  |
| H  | -3.937095 | -1.800175 | 2.188711  |

### Reactions of [*p*-NO<sub>2</sub>C<sub>6</sub>H<sub>4</sub>(Ph)I]BF<sub>4</sub>

#### G-I: adducts

|                                              |                             |
|----------------------------------------------|-----------------------------|
| Zero-point correction=                       | 0.284672 (Hartree/Particle) |
| Thermal correction to Energy=                | 0.317946                    |
| Thermal correction to Enthalpy=              | 0.318890                    |
| Thermal correction to Gibbs Free Energy=     | 0.209194                    |
| Sum of electronic and zero-point Energies=   | -2055.166109                |
| Sum of electronic and thermal Energies=      | -2055.132835                |
| Sum of electronic and thermal Enthalpies=    | -2055.131891                |
| Sum of electronic and thermal Free Energies= | -2055.241587                |
| E(RB-P86) =                                  | -2055.45078090 A.U.         |

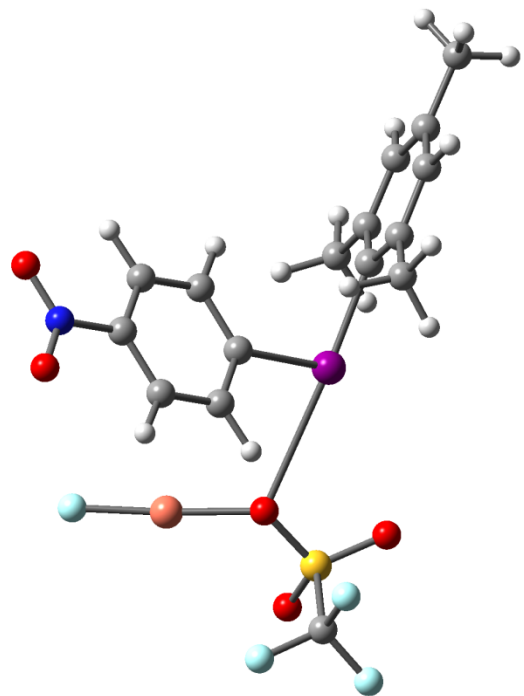

|    |           |           |           |
|----|-----------|-----------|-----------|
| O  | 2.139236  | -0.680827 | 0.302324  |
| C  | -2.947524 | -1.129865 | -0.001053 |
| C  | -3.580022 | -1.547117 | 1.188645  |
| C  | -3.619607 | -0.875434 | -1.212910 |
| C  | -4.974099 | -1.688476 | 1.128388  |
| C  | -5.014421 | -1.030635 | -1.191529 |
| C  | -5.706582 | -1.435508 | -0.041602 |
| H  | -5.499046 | -2.007804 | 2.032954  |
| H  | -5.570434 | -0.829724 | -2.111346 |
| I  | -0.821793 | -0.962779 | 0.027593  |
| C  | -0.662214 | 1.167098  | -0.154081 |
| C  | 0.389177  | 1.663687  | -0.927735 |
| C  | -1.586949 | 1.981468  | 0.499148  |
| C  | 0.518019  | 3.049125  | -1.050505 |
| H  | 1.088976  | 1.002408  | -1.437295 |
| C  | -1.451989 | 3.365239  | 0.368621  |
| H  | -2.403271 | 1.570479  | 1.092981  |
| C  | -0.402101 | 3.872559  | -0.399898 |
| H  | 1.318664  | 3.484201  | -1.647689 |
| H  | -2.148905 | 4.042485  | 0.861238  |
| Cu | 2.700522  | 0.672826  | 1.492764  |
| C  | 3.959484  | -1.694316 | -1.356558 |
| F  | 3.146134  | 2.027559  | 2.604489  |
| F  | 4.654658  | -2.808662 | -1.666475 |
| F  | 3.209165  | -1.342931 | -2.421022 |
| F  | 4.830791  | -0.699251 | -1.093592 |
| S  | 2.859928  | -2.029855 | 0.147666  |
| O  | 1.915577  | -3.060410 | -0.297197 |
| O  | 3.786756  | -2.335206 | 1.239694  |

|   |           |           |           |
|---|-----------|-----------|-----------|
| C | -2.929803 | -0.447130 | -2.482478 |
| H | -2.449934 | 0.538636  | -2.372419 |
| H | -2.147986 | -1.163448 | -2.780944 |
| H | -3.654056 | -0.375029 | -3.303977 |
| C | -2.851845 | -1.856853 | 2.474056  |
| H | -2.168681 | -2.713062 | 2.356694  |
| H | -2.253657 | -1.003080 | 2.827873  |
| H | -3.571857 | -2.112677 | 3.262120  |
| C | -7.202726 | -1.621187 | -0.064109 |
| H | -7.457149 | -2.691656 | -0.139752 |
| H | -7.665354 | -1.243544 | 0.859738  |
| H | -7.658758 | -1.107970 | -0.921785 |
| N | -0.263520 | 5.340005  | -0.534038 |
| O | -1.077223 | 6.054871  | 0.069536  |
| O | 0.658103  | 5.771119  | -1.242403 |

|                                              |                             |
|----------------------------------------------|-----------------------------|
| Zero-point correction=                       | 0.284809 (Hartree/Particle) |
| Thermal correction to Energy=                | 0.317858                    |
| Thermal correction to Enthalpy=              | 0.318802                    |
| Thermal correction to Gibbs Free Energy=     | 0.208790                    |
| Sum of electronic and zero-point Energies=   | -2055.174593                |
| Sum of electronic and thermal Energies=      | -2055.141544                |
| Sum of electronic and thermal Enthalpies=    | -2055.140600                |
| Sum of electronic and thermal Free Energies= | -2055.250613                |
| E(RB-P86) =                                  | -2055.45940240 A.U.         |

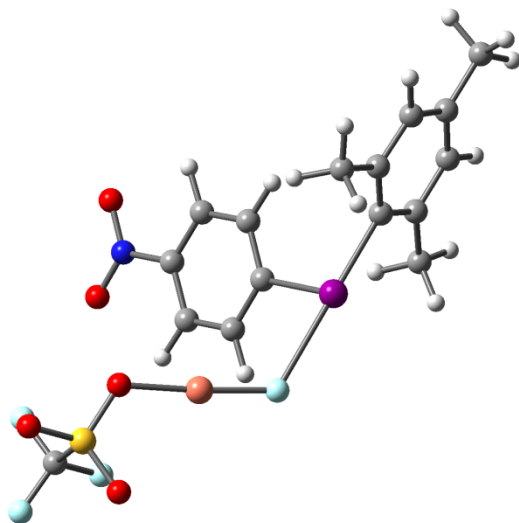

|   |          |           |           |
|---|----------|-----------|-----------|
| C | 3.798975 | -0.773585 | -0.044097 |
| C | 4.624435 | -0.105467 | -0.972239 |
| C | 4.254432 | -1.240504 | 1.208759  |
| C | 5.957041 | 0.113735  | -0.589447 |
| C | 5.598084 | -0.990965 | 1.522865  |
| C | 6.461097 | -0.315524 | 0.645986  |
| H | 6.618458 | 0.634099  | -1.287823 |
| H | 5.978591 | -1.340479 | 2.486960  |

|    |           |           |           |
|----|-----------|-----------|-----------|
| I  | 1.780362  | -1.204103 | -0.600160 |
| C  | 1.026611  | 0.781766  | -0.284431 |
| C  | 1.677992  | 1.606812  | 0.631726  |
| C  | -0.092929 | 1.181834  | -1.016044 |
| C  | 1.182787  | 2.897717  | 0.827520  |
| H  | 2.556250  | 1.270800  | 1.184429  |
| C  | -0.581275 | 2.475051  | -0.816362 |
| H  | -0.574060 | 0.506086  | -1.723001 |
| C  | 0.062156  | 3.307765  | 0.101752  |
| H  | 1.655665  | 3.575402  | 1.537540  |
| H  | -1.448423 | 2.834933  | -1.369029 |
| Cu | -2.052305 | -1.448030 | -0.134573 |
| F  | -0.638278 | -1.736326 | -1.273452 |
| C  | -5.370177 | 0.258562  | -0.163982 |
| S  | -4.890980 | -1.338553 | 0.732490  |
| F  | -5.195124 | 1.329398  | 0.639120  |
| F  | -6.669136 | 0.204864  | -0.531472 |
| F  | -4.618181 | 0.427888  | -1.274485 |
| O  | -5.083797 | -2.396685 | -0.267428 |
| O  | -5.729474 | -1.349872 | 1.934872  |
| O  | -3.428217 | -1.076116 | 1.091158  |
| C  | 7.894445  | -0.052055 | 1.034780  |
| H  | 7.947065  | 0.715185  | 1.824856  |
| H  | 8.370317  | -0.959817 | 1.435997  |
| H  | 8.484946  | 0.303361  | 0.179365  |
| C  | 3.386633  | -1.987107 | 2.194393  |
| H  | 2.488969  | -1.413566 | 2.473311  |
| H  | 3.045417  | -2.952043 | 1.786984  |
| H  | 3.950805  | -2.194423 | 3.113132  |
| C  | 4.145319  | 0.375331  | -2.319418 |
| H  | 3.759095  | -0.454313 | -2.932576 |
| H  | 3.336398  | 1.117297  | -2.224471 |
| H  | 4.968352  | 0.848205  | -2.870983 |
| N  | -0.460005 | 4.674364  | 0.311997  |
| O  | 0.122897  | 5.397685  | 1.134456  |
| O  | -1.452877 | 5.022901  | -0.344977 |

|                                              |                             |
|----------------------------------------------|-----------------------------|
| Zero-point correction=                       | 0.284859 (Hartree/Particle) |
| Thermal correction to Energy=                | 0.317861                    |
| Thermal correction to Enthalpy=              | 0.318805                    |
| Thermal correction to Gibbs Free Energy=     | 0.211248                    |
| Sum of electronic and zero-point Energies=   | -2055.177177                |
| Sum of electronic and thermal Energies=      | -2055.144175                |
| Sum of electronic and thermal Enthalpies=    | -2055.143231                |
| Sum of electronic and thermal Free Energies= | -2055.250787                |
| E(RB-P86) =                                  | -2055.46203590 A.U.         |

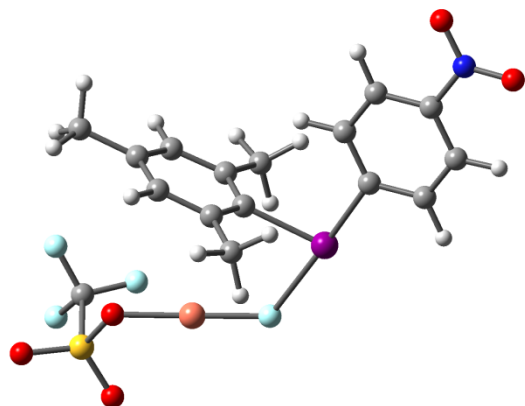

|    |           |           |           |
|----|-----------|-----------|-----------|
| C  | -3.545987 | -0.626628 | 0.115951  |
| C  | -3.823994 | 0.731892  | 0.281928  |
| C  | -4.560556 | -1.585195 | 0.007137  |
| C  | -5.156086 | 1.146344  | 0.340904  |
| H  | -3.024196 | 1.469305  | 0.364954  |
| C  | -5.891582 | -1.171690 | 0.069248  |
| H  | -4.335008 | -2.644683 | -0.129279 |
| C  | -6.167057 | 0.188467  | 0.233833  |
| I  | -1.522349 | -1.367279 | 0.027696  |
| C  | -0.586579 | 0.538445  | -0.150754 |
| C  | -0.533180 | 1.124839  | -1.428830 |
| C  | -0.032182 | 1.105860  | 1.014120  |
| C  | 0.112101  | 2.369990  | -1.509191 |
| C  | 0.600566  | 2.347154  | 0.851837  |
| C  | 0.679239  | 2.994968  | -0.390544 |
| H  | 0.171998  | 2.857192  | -2.486194 |
| H  | 1.044962  | 2.818098  | 1.733059  |
| Cu | 2.265537  | -1.055047 | -0.494163 |
| F  | 0.833334  | -2.151543 | -0.116592 |
| C  | 5.339600  | 0.239344  | 1.170400  |
| S  | 5.136235  | -0.305668 | -0.631127 |
| F  | 5.134684  | 1.567935  | 1.293594  |
| F  | 6.589663  | -0.043442 | 1.598192  |
| F  | 4.458502  | -0.405823 | 1.967272  |
| O  | 5.364530  | -1.756242 | -0.608106 |
| O  | 6.074248  | 0.538305  | -1.377712 |
| O  | 3.690866  | 0.095795  | -0.923159 |
| C  | -1.118534 | 0.499555  | -2.669611 |
| H  | -0.673201 | -0.486309 | -2.876012 |
| H  | -2.207474 | 0.358291  | -2.579572 |
| H  | -0.935426 | 1.142331  | -3.540238 |
| C  | -0.083090 | 0.459089  | 2.375873  |
| H  | -1.119449 | 0.305262  | 2.715641  |
| H  | 0.415013  | -0.523089 | 2.375576  |
| H  | 0.422191  | 1.094314  | 3.114865  |
| C  | 1.350951  | 4.339931  | -0.510782 |
| H  | 0.698509  | 5.134656  | -0.112241 |
| H  | 2.286558  | 4.369585  | 0.067135  |

|   |           |           |           |
|---|-----------|-----------|-----------|
| H | 1.576958  | 4.585031  | -1.557548 |
| H | -5.410488 | 2.198038  | 0.469374  |
| H | -6.706995 | -1.889587 | -0.013304 |
| N | -7.574546 | 0.628301  | 0.295856  |
| O | -8.458992 | -0.236128 | 0.189272  |
| O | -7.798824 | 1.839268  | 0.451246  |

### G-I: TS's

|                                              |                             |
|----------------------------------------------|-----------------------------|
| Zero-point correction=                       | 0.282803 (Hartree/Particle) |
| Thermal correction to Energy=                | 0.315657                    |
| Thermal correction to Enthalpy=              | 0.316601                    |
| Thermal correction to Gibbs Free Energy=     | 0.209023                    |
| Sum of electronic and zero-point Energies=   | -2055.157548                |
| Sum of electronic and thermal Energies=      | -2055.124695                |
| Sum of electronic and thermal Enthalpies=    | -2055.123751                |
| Sum of electronic and thermal Free Energies= | -2055.231328                |
| E(RB-P86) =                                  | -2055.44035161 A.U.         |

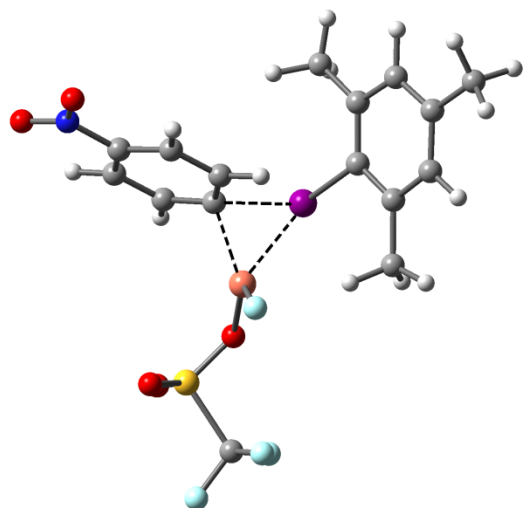

|   |           |           |           |
|---|-----------|-----------|-----------|
| O | -2.569210 | -0.565189 | -0.592383 |
| C | 2.550565  | -1.522101 | -0.365837 |
| C | 3.778944  | -1.023710 | -0.855934 |
| C | 2.423575  | -2.434128 | 0.704747  |
| C | 4.930183  | -1.477557 | -0.200537 |
| C | 3.624426  | -2.838801 | 1.306936  |
| C | 4.877283  | -2.379812 | 0.874550  |
| H | 5.899958  | -1.110388 | -0.547072 |
| H | 3.568745  | -3.537929 | 2.145540  |
| I | 0.793846  | -0.916806 | -1.380561 |
| C | 0.488067  | 1.200576  | -0.196940 |
| C | 1.493137  | 1.498780  | 0.730778  |
| C | -0.173140 | 2.174528  | -0.961374 |
| C | 1.759575  | 2.840973  | 0.993231  |
| H | 2.025463  | 0.714889  | 1.270617  |
| C | 0.096155  | 3.515581  | -0.679292 |
| H | -0.890300 | 1.914649  | -1.740364 |



|    |           |           |           |
|----|-----------|-----------|-----------|
| C  | 1.054028  | 3.825115  | 0.289701  |
| H  | 2.503079  | 3.125522  | 1.737314  |
| H  | -0.414307 | 4.310497  | -1.222406 |
| Cu | -0.900773 | -0.068016 | 0.465804  |
| C  | -4.843298 | -1.438329 | 0.445125  |
| F  | -0.652254 | -0.230798 | 2.326931  |
| F  | -6.100361 | -1.079316 | 0.789057  |
| F  | -4.917643 | -2.427781 | -0.472091 |
| F  | -4.220268 | -1.918649 | 1.543080  |
| S  | -3.915264 | 0.053393  | -0.254467 |
| O  | -4.678709 | 0.429889  | -1.450595 |
| O  | -3.855906 | 1.013974  | 0.857289  |
| C  | 3.899980  | -0.062275 | -2.010756 |
| H  | 3.500134  | -0.493807 | -2.942091 |
| H  | 3.357786  | 0.877354  | -1.820530 |
| H  | 4.954090  | 0.189463  | -2.183854 |
| C  | 1.109965  | -2.955789 | 1.224387  |
| H  | 0.489963  | -2.141860 | 1.642061  |
| H  | 0.527433  | -3.451987 | 0.432552  |
| H  | 1.285767  | -3.688503 | 2.022653  |
| C  | 6.144581  | -2.862261 | 1.530533  |
| H  | 5.958266  | -3.220896 | 2.552160  |
| H  | 6.576058  | -3.700286 | 0.957179  |
| H  | 6.904043  | -2.067840 | 1.565050  |
| N  | 1.353081  | 5.242787  | 0.563583  |
| O  | 0.724562  | 6.102563  | -0.074243 |
| O  | 2.217467  | 5.498095  | 1.417467  |

|                                              |                             |
|----------------------------------------------|-----------------------------|
| Zero-point correction=                       | 0.283622 (Hartree/Particle) |
| Thermal correction to Energy=                | 0.315893                    |
| Thermal correction to Enthalpy=              | 0.316837                    |
| Thermal correction to Gibbs Free Energy=     | 0.214155                    |
| Sum of electronic and zero-point Energies=   | -2055.159553                |
| Sum of electronic and thermal Energies=      | -2055.127282                |
| Sum of electronic and thermal Enthalpies=    | -2055.126338                |
| Sum of electronic and thermal Free Energies= | -2055.229020                |
| E(RB-P86) =                                  | -2055.44317483 A.U.         |

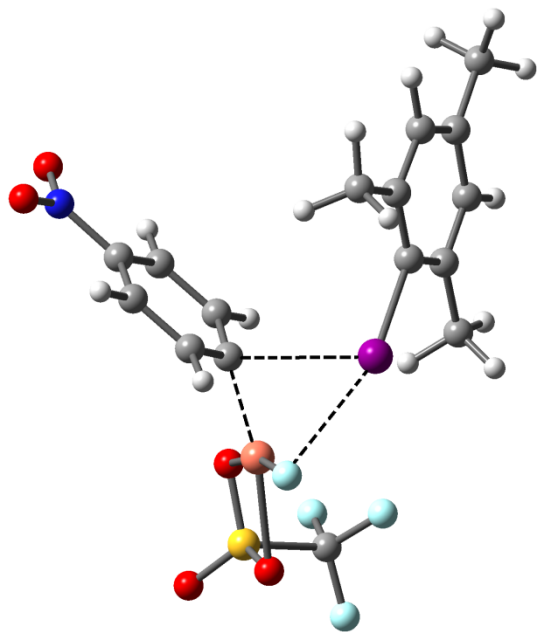

|    |           |           |           |
|----|-----------|-----------|-----------|
| C  | -2.128222 | -1.828093 | -0.339944 |
| C  | -1.723251 | -2.819012 | 0.584842  |
| C  | -3.470560 | -1.397964 | -0.467641 |
| C  | -2.722170 | -3.386683 | 1.387547  |
| C  | -4.416394 | -2.006834 | 0.367479  |
| C  | -4.067234 | -2.995697 | 1.300933  |
| H  | -2.435488 | -4.162748 | 2.103007  |
| H  | -5.461617 | -1.696102 | 0.282054  |
| I  | -0.674572 | -0.966493 | -1.610030 |
| C  | -0.209473 | 1.462718  | -0.377287 |
| C  | -0.665811 | 2.496652  | -1.202453 |
| C  | -0.570910 | 1.336817  | 0.967925  |
| C  | -1.430692 | 3.509842  | -0.621782 |
| H  | -0.404076 | 2.525488  | -2.259661 |
| C  | -1.338938 | 2.353847  | 1.537938  |
| H  | -0.244633 | 0.495421  | 1.579157  |
| C  | -1.752800 | 3.424460  | 0.737524  |
| H  | -1.782392 | 4.352241  | -1.217295 |
| H  | -1.620358 | 2.314101  | 2.590164  |
| Cu | 1.592427  | 0.841273  | -0.862775 |
| F  | 1.277527  | 0.846101  | -2.703410 |
| C  | 4.066553  | -1.349010 | 1.124380  |
| S  | 3.814595  | 0.443237  | 0.568675  |
| F  | 3.181386  | -2.154733 | 0.510461  |
| F  | 5.313601  | -1.745797 | 0.810250  |
| F  | 3.897311  | -1.440637 | 2.456347  |
| O  | 3.795709  | 0.393983  | -0.925437 |
| O  | 4.868493  | 1.200925  | 1.231556  |
| O  | 2.390223  | 0.763601  | 1.007026  |
| C  | -0.298853 | -3.292622 | 0.721837  |
| H  | 0.059885  | -3.761877 | -0.208255 |

|   |           |           |           |
|---|-----------|-----------|-----------|
| H | 0.385544  | -2.461417 | 0.948671  |
| H | -0.217720 | -4.032693 | 1.528948  |
| C | -3.913877 | -0.344598 | -1.451680 |
| H | -3.403193 | 0.615202  | -1.276788 |
| H | -3.695227 | -0.643947 | -2.489194 |
| H | -4.995319 | -0.173834 | -1.367439 |
| C | -5.108299 | -3.603219 | 2.205904  |
| H | -4.828819 | -4.620770 | 2.514082  |
| H | -5.219958 | -3.000920 | 3.123848  |
| H | -6.093150 | -3.638618 | 1.718128  |
| N | -2.575336 | 4.483692  | 1.340609  |
| O | -2.867501 | 4.381867  | 2.544670  |
| O | -2.936995 | 5.426128  | 0.615136  |

|                                              |                             |
|----------------------------------------------|-----------------------------|
| Zero-point correction=                       | 0.282721 (Hartree/Particle) |
| Thermal correction to Energy=                | 0.315528                    |
| Thermal correction to Enthalpy=              | 0.316473                    |
| Thermal correction to Gibbs Free Energy=     | 0.210456                    |
| Sum of electronic and zero-point Energies=   | -2055.159384                |
| Sum of electronic and thermal Energies=      | -2055.126576                |
| Sum of electronic and thermal Enthalpies=    | -2055.125632                |
| Sum of electronic and thermal Free Energies= | -2055.231649                |
| E(RB-P86) =                                  | -2055.44210466 A.U.         |

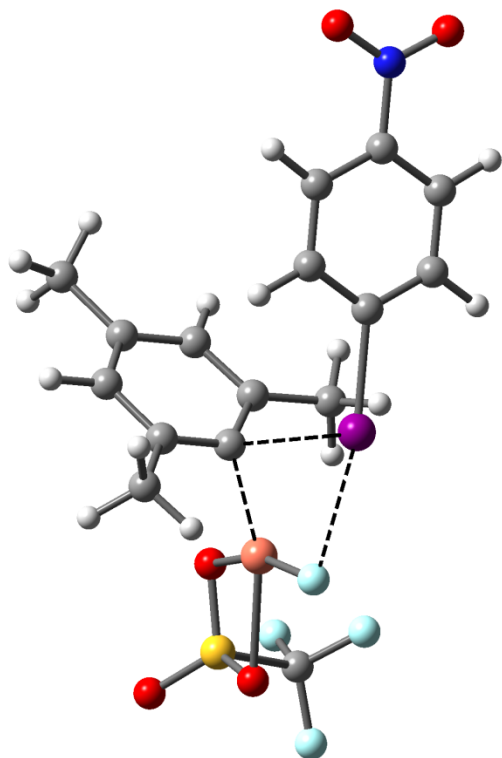

|   |           |           |           |
|---|-----------|-----------|-----------|
| C | -3.139081 | -1.020506 | -0.100032 |
| C | -3.607178 | -1.396034 | 1.169297  |
| C | -3.900281 | -0.187914 | -0.935866 |

|    |           |           |           |
|----|-----------|-----------|-----------|
| C  | -4.851165 | -0.941516 | 1.605279  |
| H  | -3.011853 | -2.041741 | 1.815855  |
| C  | -5.142855 | 0.271202  | -0.500465 |
| H  | -3.533735 | 0.099155  | -1.922102 |
| C  | -5.599756 | -0.113008 | 0.763803  |
| H  | -5.240053 | -1.220411 | 2.584225  |
| H  | -5.755114 | 0.917337  | -1.128890 |
| I  | -1.261928 | -1.726466 | -0.761272 |
| C  | 0.332142  | 0.728864  | -0.541778 |
| C  | 0.090946  | 1.388271  | -1.748281 |
| C  | 0.069686  | 1.208717  | 0.748640  |
| C  | -0.267131 | 2.746320  | -1.611433 |
| C  | -0.294618 | 2.565236  | 0.798379  |
| C  | -0.465994 | 3.343649  | -0.360771 |
| H  | -0.410522 | 3.329570  | -2.526647 |
| H  | -0.453137 | 3.012816  | 1.784575  |
| Cu | 1.971406  | -0.379969 | -0.651469 |
| F  | 1.356672  | -1.932142 | -1.435991 |
| C  | 5.086745  | -0.355463 | 1.652024  |
| S  | 4.505352  | 0.306640  | -0.022879 |
| F  | 4.158453  | -1.175552 | 2.180018  |
| F  | 6.235830  | -1.040141 | 1.493093  |
| F  | 5.300592  | 0.668754  | 2.500263  |
| O  | 4.159563  | -0.910426 | -0.819292 |
| O  | 5.594702  | 1.155868  | -0.493644 |
| O  | 3.199945  | 1.011486  | 0.294905  |
| C  | 0.248976  | 0.403682  | 2.009552  |
| H  | -0.181844 | 0.934164  | 2.868789  |
| H  | -0.230642 | -0.583072 | 1.927321  |
| H  | 1.318468  | 0.236014  | 2.214646  |
| C  | -0.868434 | 4.793804  | -0.252852 |
| H  | -1.560568 | 4.956671  | 0.586020  |
| H  | 0.017473  | 5.425776  | -0.071110 |
| H  | -1.344833 | 5.148890  | -1.177172 |
| C  | 0.219728  | 0.760788  | -3.115249 |
| H  | 0.573028  | -0.276388 | -3.051013 |
| H  | -0.756286 | 0.765051  | -3.625350 |
| H  | 0.919025  | 1.337761  | -3.739448 |
| N  | -6.912295 | 0.372811  | 1.224832  |
| O  | -7.301496 | 0.021070  | 2.350986  |
| O  | -7.561697 | 1.109438  | 0.463873  |

**J: adduct**

|                                              |                             |
|----------------------------------------------|-----------------------------|
| Zero-point correction=                       | 0.359880 (Hartree/Particle) |
| Thermal correction to Energy=                | 0.391321                    |
| Thermal correction to Enthalpy=              | 0.392265                    |
| Thermal correction to Gibbs Free Energy=     | 0.288669                    |
| Sum of electronic and zero-point Energies=   | -1341.794483                |
| Sum of electronic and thermal Energies=      | -1341.763042                |
| Sum of electronic and thermal Enthalpies=    | -1341.762098                |
| Sum of electronic and thermal Free Energies= | -1341.865693                |

E(RB-P86) = -1342.15436276 A.U

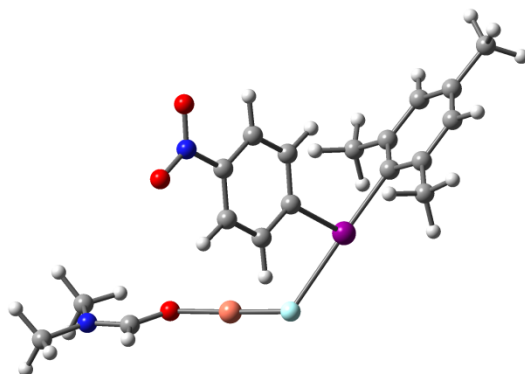

|    |           |           |           |
|----|-----------|-----------|-----------|
| C  | -3.087660 | -0.875987 | 0.058078  |
| C  | -3.329947 | -1.475045 | 1.312711  |
| C  | -4.078712 | -0.205456 | -0.691305 |
| C  | -4.632790 | -1.361323 | 1.821924  |
| C  | -5.356813 | -0.128273 | -0.119488 |
| C  | -5.654489 | -0.697328 | 1.127913  |
| H  | -4.849723 | -1.808285 | 2.796221  |
| H  | -6.141944 | 0.395237  | -0.672362 |
| I  | -1.139158 | -1.084601 | -0.791140 |
| C  | -0.483211 | 0.923651  | -0.392578 |
| C  | 0.586601  | 1.416708  | -1.141282 |
| C  | -1.143645 | 1.667969  | 0.584150  |
| C  | 1.017031  | 2.721434  | -0.891609 |
| H  | 1.075255  | 0.797269  | -1.893813 |
| C  | -0.707981 | 2.972440  | 0.826716  |
| H  | -1.982995 | 1.260882  | 1.149146  |
| C  | 0.365076  | 3.474762  | 0.087350  |
| H  | 1.845600  | 3.151844  | -1.453191 |
| H  | -1.190790 | 3.590668  | 1.582816  |
| Cu | 2.693224  | -1.474910 | -0.779840 |
| F  | 1.202076  | -1.398547 | -1.846974 |
| C  | 5.234307  | -0.899423 | 0.199420  |
| H  | 5.365132  | -0.196169 | -0.635956 |
| O  | 4.171081  | -1.581214 | 0.343408  |
| N  | 6.262488  | -0.981915 | 1.037931  |
| C  | 6.241292  | -1.869641 | 2.202417  |
| H  | 6.364808  | -1.273983 | 3.118809  |
| H  | 5.286204  | -2.403351 | 2.231316  |
| H  | 7.069832  | -2.589236 | 2.129436  |
| C  | 7.470489  | -0.182075 | 0.827031  |
| H  | 7.636933  | 0.475382  | 1.692817  |
| H  | 8.338889  | -0.846602 | 0.709357  |
| H  | 7.357827  | 0.429930  | -0.076129 |
| C  | -3.821784 | 0.423355  | -2.038429 |
| H  | -3.067414 | 1.224452  | -1.979217 |
| H  | -3.457982 | -0.316497 | -2.769048 |
| H  | -4.745335 | 0.864371  | -2.435501 |

|   |           |           |           |
|---|-----------|-----------|-----------|
| C | -2.282963 | -2.219173 | 2.107575  |
| H | -1.927881 | -3.114105 | 1.572281  |
| H | -1.402693 | -1.593173 | 2.321675  |
| H | -2.701223 | -2.549658 | 3.067373  |
| C | -7.049199 | -0.619218 | 1.696582  |
| H | -7.660140 | -1.463602 | 1.335003  |
| H | -7.038319 | -0.667678 | 2.794630  |
| H | -7.556477 | 0.306218  | 1.388367  |
| N | 0.826521  | 4.853655  | 0.350403  |
| O | 0.225235  | 5.511877  | 1.213276  |
| O | 1.791051  | 5.277191  | -0.305045 |

**J: TS**

|                                              |                             |
|----------------------------------------------|-----------------------------|
| Zero-point correction=                       | 0.358502 (Hartree/Particle) |
| Thermal correction to Energy=                | 0.389397                    |
| Thermal correction to Enthalpy=              | 0.390341                    |
| Thermal correction to Gibbs Free Energy=     | 0.289744                    |
| Sum of electronic and zero-point Energies=   | -1341.775628                |
| Sum of electronic and thermal Energies=      | -1341.744733                |
| Sum of electronic and thermal Enthalpies=    | -1341.743789                |
| Sum of electronic and thermal Free Energies= | -1341.844385                |
| E(RB-P86) =                                  | -1342.13412971 A.U          |

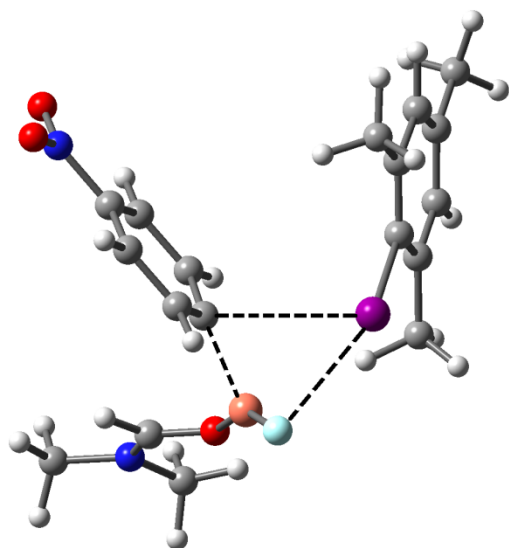

|   |           |           |           |
|---|-----------|-----------|-----------|
| C | -2.657299 | -0.196033 | -0.095559 |
| C | -2.944199 | -1.321106 | 0.715120  |
| C | -3.227224 | 1.079922  | 0.128604  |
| C | -3.846846 | -1.131707 | 1.768548  |
| C | -4.122266 | 1.197089  | 1.200075  |
| C | -4.444779 | 0.112309  | 2.031139  |
| H | -4.092240 | -1.988184 | 2.403013  |
| H | -4.582349 | 2.171076  | 1.388890  |
| I | -1.338510 | -0.430625 | -1.725734 |
| C | 1.394153  | 0.610117  | -0.611120 |

|    |           |           |           |
|----|-----------|-----------|-----------|
| C  | 1.918313  | 1.591074  | -1.446949 |
| C  | 1.095071  | 0.793489  | 0.734933  |
| C  | 2.243686  | 2.821702  | -0.864239 |
| H  | 2.087011  | 1.409422  | -2.507142 |
| C  | 1.424376  | 2.028861  | 1.303632  |
| H  | 0.633279  | 0.018917  | 1.346828  |
| C  | 1.996761  | 3.016012  | 0.496893  |
| H  | 2.676933  | 3.620529  | -1.466238 |
| H  | 1.229584  | 2.221273  | 2.358687  |
| Cu | 1.503430  | -1.189608 | -1.322978 |
| F  | 1.401423  | -0.799797 | -3.113059 |
| C  | 2.970072  | -2.054747 | 0.936751  |
| H  | 3.631664  | -1.188919 | 0.794156  |
| O  | 1.931855  | -2.222836 | 0.208648  |
| N  | 3.309508  | -2.890099 | 1.901616  |
| C  | 2.522676  | -4.090529 | 2.203439  |
| H  | 2.293960  | -4.104556 | 3.277846  |
| H  | 1.596325  | -4.074975 | 1.621204  |
| H  | 3.108834  | -4.985239 | 1.948473  |
| C  | 4.520844  | -2.663286 | 2.697732  |
| H  | 4.247024  | -2.569288 | 3.758039  |
| H  | 5.204903  | -3.514807 | 2.575008  |
| H  | 5.017755  | -1.744734 | 2.364739  |
| C  | -2.919498 | 2.284261  | -0.723671 |
| H  | -1.842781 | 2.515572  | -0.718626 |
| H  | -3.210315 | 2.121187  | -1.773820 |
| H  | -3.460771 | 3.164719  | -0.352777 |
| C  | -2.338186 | -2.681521 | 0.484372  |
| H  | -2.610803 | -3.081613 | -0.505332 |
| H  | -1.238111 | -2.644827 | 0.525552  |
| H  | -2.686464 | -3.390233 | 1.247373  |
| C  | -5.388598 | 0.281193  | 3.193150  |
| H  | -6.043924 | 1.152820  | 3.057066  |
| H  | -6.012529 | -0.613416 | 3.335628  |
| H  | -4.824250 | 0.433863  | 4.129282  |
| N  | 2.333818  | 4.319297  | 1.101589  |
| O  | 2.820272  | 5.191968  | 0.365380  |
| O  | 2.112925  | 4.471411  | 2.313525  |

#### K, L: adducts

|                                              |                             |
|----------------------------------------------|-----------------------------|
| Zero-point correction=                       | 0.259892 (Hartree/Particle) |
| Thermal correction to Energy=                | 0.285340                    |
| Thermal correction to Enthalpy=              | 0.286285                    |
| Thermal correction to Gibbs Free Energy=     | 0.198119                    |
| Sum of electronic and zero-point Energies=   | -1193.340283                |
| Sum of electronic and thermal Energies=      | -1193.314835                |
| Sum of electronic and thermal Enthalpies=    | -1193.313890                |
| Sum of electronic and thermal Free Energies= | -1193.402056                |
| E(RB-P86) =                                  | -1193.60017490 A.U.         |

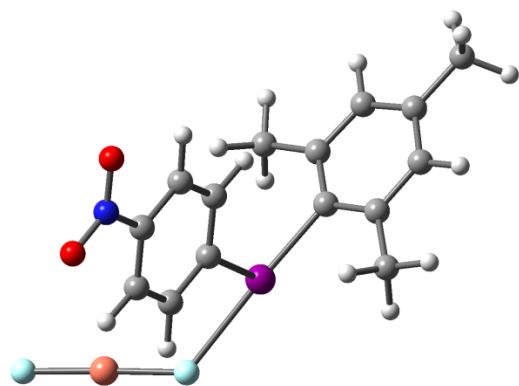

|    |           |           |           |
|----|-----------|-----------|-----------|
| C  | -2.385249 | -0.515336 | -0.069864 |
| C  | -2.956584 | -0.777047 | 1.192760  |
| C  | -3.083036 | 0.121223  | -1.121467 |
| C  | -4.281169 | -0.351369 | 1.387953  |
| C  | -4.398838 | 0.521534  | -0.855582 |
| C  | -5.014456 | 0.298218  | 0.386566  |
| H  | -4.747721 | -0.538996 | 2.358935  |
| H  | -4.959622 | 1.022517  | -1.649910 |
| I  | -0.402541 | -1.219620 | -0.451508 |
| C  | 0.568504  | 0.682738  | -0.194752 |
| C  | 1.853504  | 0.833498  | -0.717657 |
| C  | -0.111093 | 1.700990  | 0.473203  |
| C  | 2.486598  | 2.068079  | -0.559675 |
| H  | 2.348664  | 0.006451  | -1.227598 |
| C  | 0.529111  | 2.932264  | 0.627936  |
| H  | -1.118285 | 1.557882  | 0.867019  |
| C  | 1.815957  | 3.094394  | 0.109598  |
| H  | 3.488681  | 2.234379  | -0.953883 |
| H  | 0.037962  | 3.754812  | 1.146795  |
| Cu | 3.298928  | -2.411089 | 0.178787  |
| F  | 4.675498  | -2.728000 | 1.309865  |
| F  | 1.922039  | -2.098862 | -1.005198 |
| C  | -2.482487 | 0.386928  | -2.480299 |
| H  | -1.595803 | 1.037724  | -2.417014 |
| H  | -2.170170 | -0.545653 | -2.976281 |
| H  | -3.215282 | 0.884562  | -3.129005 |
| C  | -2.232737 | -1.482794 | 2.315182  |
| H  | -1.982384 | -2.521717 | 2.047685  |
| H  | -1.291850 | -0.977984 | 2.583555  |
| H  | -2.864861 | -1.512680 | 3.212484  |
| C  | -6.431597 | 0.754016  | 0.628936  |
| H  | -7.113234 | 0.345612  | -0.133652 |
| H  | -6.792347 | 0.442064  | 1.618510  |
| H  | -6.503949 | 1.852049  | 0.568440  |
| N  | 2.490098  | 4.398224  | 0.274423  |
| O  | 1.878810  | 5.295867  | 0.875044  |
| O  | 3.631049  | 4.525459  | -0.196419 |



Zero-point correction= 0.260049 (Hartree/Particle)  
 Thermal correction to Energy= 0.285418  
 Thermal correction to Enthalpy= 0.286362  
 Thermal correction to Gibbs Free Energy= 0.198898  
 Sum of electronic and zero-point Energies= -1193.342088  
 Sum of electronic and thermal Energies= -1193.316719  
 Sum of electronic and thermal Enthalpies= -1193.315775  
 Sum of electronic and thermal Free Energies= -1193.403239  
 E(RB-P86) = -1193.60213675 A.U.

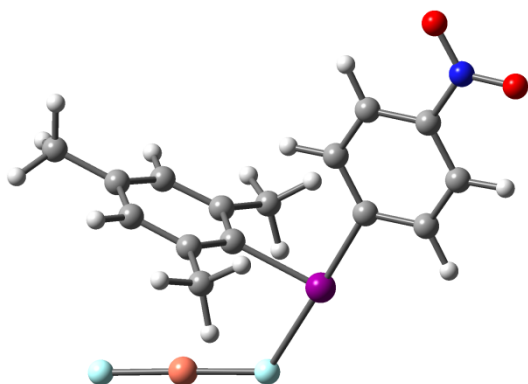

|    |           |           |           |
|----|-----------|-----------|-----------|
| C  | -2.029061 | -0.620603 | 0.030370  |
| C  | -2.313796 | 0.744478  | 0.111290  |
| C  | -3.040547 | -1.583807 | -0.069727 |
| C  | -3.646827 | 1.159737  | 0.091629  |
| H  | -1.517485 | 1.486204  | 0.190262  |
| C  | -4.372528 | -1.170119 | -0.087874 |
| H  | -2.810814 | -2.649239 | -0.136156 |
| C  | -4.653779 | 0.196736  | -0.007577 |
| H  | -3.905378 | 2.216495  | 0.152977  |
| H  | -5.184224 | -1.892821 | -0.165058 |
| I  | -0.005692 | -1.373739 | 0.056076  |
| C  | 0.938091  | 0.535642  | 0.044924  |
| C  | 1.140376  | 1.160465  | -1.201222 |
| C  | 1.341596  | 1.072363  | 1.282076  |
| C  | 1.778130  | 2.409900  | -1.167788 |
| C  | 1.974307  | 2.325041  | 1.233510  |
| C  | 2.196851  | 3.007993  | 0.029904  |
| H  | 1.955308  | 2.923956  | -2.116572 |
| H  | 2.305906  | 2.771783  | 2.174773  |
| Cu | 3.815570  | -1.112288 | -0.106579 |
| F  | 5.301033  | -0.088664 | -0.270324 |
| F  | 2.324547  | -2.190345 | 0.062049  |
| C  | 1.148053  | 0.379985  | 2.607871  |
| H  | 1.548779  | 0.999690  | 3.420522  |
| H  | 0.084122  | 0.191593  | 2.821089  |
| H  | 1.669245  | -0.590042 | 2.632915  |
| C  | 0.720422  | 0.564979  | -2.521472 |
| H  | -0.365730 | 0.385991  | -2.562435 |

|   |           |           |           |
|---|-----------|-----------|-----------|
| H | 0.978707  | 1.245235  | -3.343362 |
| H | 1.222114  | -0.397766 | -2.708005 |
| C | 2.861657  | 4.361884  | 0.020174  |
| H | 3.506068  | 4.483434  | -0.862561 |
| H | 2.104749  | 5.163496  | -0.015390 |
| H | 3.467844  | 4.518378  | 0.923256  |
| N | -6.061531 | 0.637741  | -0.028497 |
| O | -6.942326 | -0.231966 | -0.124198 |
| O | -6.290954 | 1.855338  | 0.050444  |

### K, L: TS's

|                                              |                             |
|----------------------------------------------|-----------------------------|
| Zero-point correction=                       | 0.258659 (Hartree/Particle) |
| Thermal correction to Energy=                | 0.283442                    |
| Thermal correction to Enthalpy=              | 0.284386                    |
| Thermal correction to Gibbs Free Energy=     | 0.199906                    |
| Sum of electronic and zero-point Energies=   | -1193.329670                |
| Sum of electronic and thermal Energies=      | -1193.304888                |
| Sum of electronic and thermal Enthalpies=    | -1193.303943                |
| Sum of electronic and thermal Free Energies= | -1193.388423                |
| E(RB-P86) =                                  | -1193.58832954 A.U.         |

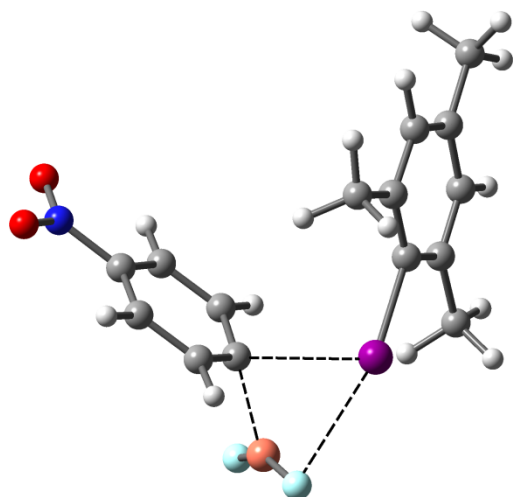

|   |           |           |           |
|---|-----------|-----------|-----------|
| C | -2.190119 | 0.104178  | -0.300926 |
| C | -3.025213 | -0.166376 | 0.807077  |
| C | -2.252114 | 1.310073  | -1.039525 |
| C | -3.949920 | 0.827626  | 1.161377  |
| C | -3.197293 | 2.257700  | -0.629036 |
| C | -4.050302 | 2.041067  | 0.466175  |
| H | -4.612643 | 0.641338  | 2.011165  |
| H | -3.268449 | 3.196466  | -1.186012 |
| I | -0.790881 | -1.368752 | -0.887403 |
| C | 1.446887  | -0.386182 | 0.100933  |
| C | 2.357541  | -0.116675 | -0.930686 |
| C | 1.150182  | 0.528938  | 1.118832  |
| C | 3.075117  | 1.077803  | -0.877290 |
| H | 2.522323  | -0.834258 | -1.733528 |

|    |           |           |           |
|----|-----------|-----------|-----------|
| C  | 1.872083  | 1.721181  | 1.158237  |
| H  | 0.405842  | 0.315100  | 1.884766  |
| C  | 2.825953  | 1.978744  | 0.165247  |
| H  | 3.812482  | 1.316613  | -1.643563 |
| H  | 1.696039  | 2.449031  | 1.950233  |
| Cu | 1.574258  | -2.294883 | 0.649343  |
| F  | 1.669386  | -2.228686 | 2.471201  |
| F  | 1.565319  | -2.994673 | -1.073773 |
| C  | -2.981902 | -1.454530 | 1.590981  |
| H  | -3.236484 | -2.319523 | 0.957884  |
| H  | -1.982672 | -1.645183 | 2.011609  |
| H  | -3.699814 | -1.418928 | 2.420986  |
| C  | -1.368625 | 1.599996  | -2.226806 |
| H  | -0.301808 | 1.584547  | -1.954227 |
| H  | -1.510686 | 0.855302  | -3.026222 |
| H  | -1.597928 | 2.591073  | -2.640103 |
| C  | -5.038939 | 3.098860  | 0.885857  |
| H  | -5.633062 | 3.449367  | 0.027555  |
| H  | -5.726655 | 2.725663  | 1.656938  |
| H  | -4.515909 | 3.979711  | 1.293759  |
| N  | 3.566535  | 3.243041  | 0.202709  |
| O  | 4.400159  | 3.460437  | -0.695640 |
| O  | 3.324158  | 4.037522  | 1.129599  |

|                                              |                             |
|----------------------------------------------|-----------------------------|
| Zero-point correction=                       | 0.258135 (Hartree/Particle) |
| Thermal correction to Energy=                | 0.283234                    |
| Thermal correction to Enthalpy=              | 0.284178                    |
| Thermal correction to Gibbs Free Energy=     | 0.198494                    |
| Sum of electronic and zero-point Energies=   | -1193.328419                |
| Sum of electronic and thermal Energies=      | -1193.303321                |
| Sum of electronic and thermal Enthalpies=    | -1193.302376                |
| Sum of electronic and thermal Free Energies= | -1193.388060                |
| E(RB-P86) =                                  | -1193.58655415 A.U.         |

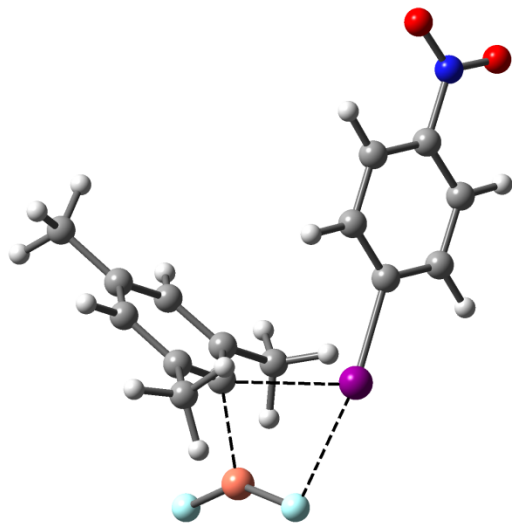

|    |           |           |           |
|----|-----------|-----------|-----------|
| C  | -1.708652 | -0.938568 | -0.206288 |
| C  | -2.497592 | -1.405948 | 0.856186  |
| C  | -2.208747 | -0.009370 | -1.131097 |
| C  | -3.808737 | -0.949013 | 0.987755  |
| H  | -2.102485 | -2.126553 | 1.573525  |
| C  | -3.516436 | 0.455806  | -0.995821 |
| H  | -1.589990 | 0.348239  | -1.954782 |
| C  | -4.296600 | -0.024050 | 0.060215  |
| H  | -4.447793 | -1.299881 | 1.797516  |
| H  | -3.933177 | 1.176126  | -1.699137 |
| I  | 0.265071  | -1.669846 | -0.433680 |
| C  | 1.670721  | 0.643481  | 0.018378  |
| C  | 1.898311  | 1.239686  | -1.226556 |
| C  | 1.131308  | 1.265992  | 1.153143  |
| C  | 1.717955  | 2.638742  | -1.252419 |
| C  | 0.965783  | 2.657535  | 1.038102  |
| C  | 1.251318  | 3.357934  | -0.145487 |
| H  | 1.939327  | 3.159175  | -2.189272 |
| H  | 0.602863  | 3.198251  | 1.917794  |
| Cu | 3.133470  | -0.666077 | 0.502511  |
| F  | 4.073182  | 0.217892  | 1.815758  |
| F  | 2.884906  | -2.127737 | -0.625374 |
| C  | 2.318049  | 0.502223  | -2.472402 |
| H  | 2.770655  | 1.195380  | -3.193998 |
| H  | 3.029788  | -0.304911 | -2.248949 |
| H  | 1.441747  | 0.036144  | -2.953321 |
| C  | 0.840856  | 0.560140  | 2.451320  |
| H  | 0.438871  | 1.265272  | 3.190580  |
| H  | 0.110099  | -0.252119 | 2.318060  |
| H  | 1.764927  | 0.116872  | 2.855984  |
| C  | 1.053061  | 4.852655  | -0.217830 |
| H  | 1.017287  | 5.203540  | -1.258453 |
| H  | 0.124110  | 5.157245  | 0.286828  |
| H  | 1.882287  | 5.378875  | 0.284290  |
| N  | -5.682708 | 0.461274  | 0.199562  |
| O  | -6.361758 | 0.020585  | 1.141238  |
| O  | -6.097657 | 1.284742  | -0.632243 |

### Reactions of [*p*-MeOC<sub>6</sub>H<sub>4</sub>(Ph)]BF<sub>4</sub>

#### G-I: adducts

|                                              |                             |
|----------------------------------------------|-----------------------------|
| Zero-point correction=                       | 0.313963 (Hartree/Particle) |
| Thermal correction to Energy=                | 0.347438                    |
| Thermal correction to Enthalpy=              | 0.348382                    |
| Thermal correction to Gibbs Free Energy=     | 0.238504                    |
| Sum of electronic and zero-point Energies=   | -1965.107646                |
| Sum of electronic and thermal Energies=      | -1965.074172                |
| Sum of electronic and thermal Enthalpies=    | -1965.073227                |
| Sum of electronic and thermal Free Energies= | -1965.183105                |
| E(RB-P86) =                                  | -1965.42160904 A.U.         |

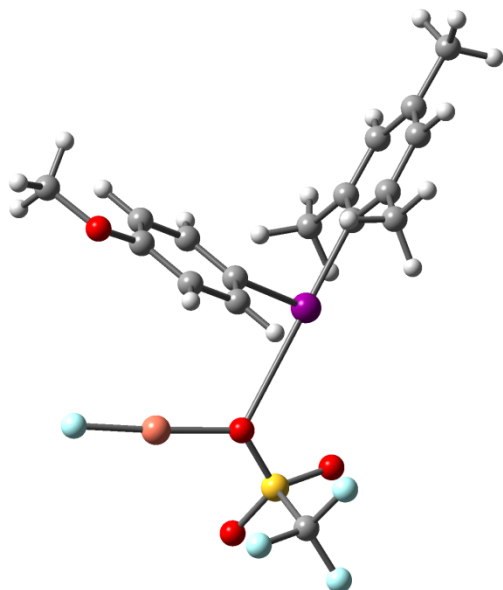

|    |           |           |           |
|----|-----------|-----------|-----------|
| O  | -2.106256 | -0.608169 | -0.367148 |
| C  | 3.014654  | -0.914719 | -0.052531 |
| C  | 3.719664  | -1.211590 | -1.236006 |
| C  | 3.622603  | -0.740406 | 1.205466  |
| C  | 5.114332  | -1.317944 | -1.118720 |
| C  | 5.021340  | -0.854923 | 1.243936  |
| C  | 5.781859  | -1.143562 | 0.102337  |
| H  | 5.691981  | -1.545022 | -2.019284 |
| H  | 5.524668  | -0.713834 | 2.204604  |
| I  | 0.878419  | -0.787748 | -0.186313 |
| C  | 0.578035  | 1.283927  | 0.165427  |
| C  | -0.128250 | 1.658851  | 1.316161  |
| C  | 1.045643  | 2.218084  | -0.758211 |
| C  | -0.361863 | 3.011279  | 1.541198  |
| H  | -0.493766 | 0.917401  | 2.027354  |
| C  | 0.818312  | 3.576924  | -0.518999 |
| H  | 1.583699  | 1.914857  | -1.656859 |
| C  | 0.111473  | 3.978024  | 0.630667  |
| H  | -0.911513 | 3.337745  | 2.425940  |
| H  | 1.187213  | 4.306168  | -1.239550 |
| Cu | -2.899335 | 1.012830  | -0.912033 |
| C  | -3.652490 | -2.113300 | 1.195812  |
| F  | -3.581151 | 2.607327  | -1.429393 |
| F  | -4.305262 | -3.292143 | 1.277831  |
| F  | -2.745464 | -2.052354 | 2.192977  |
| F  | -4.543879 | -1.113849 | 1.361254  |
| S  | -2.796525 | -1.973005 | -0.486790 |
| O  | -1.798892 | -3.048473 | -0.488752 |
| O  | -3.881330 | -2.008252 | -1.471162 |
| C  | 2.861593  | -0.434439 | 2.470010  |
| H  | 2.361338  | 0.545280  | 2.414164  |
| H  | 2.085614  | -1.190576 | 2.669749  |

|   |           |           |           |
|---|-----------|-----------|-----------|
| H | 3.543625  | -0.413886 | 3.329999  |
| C | 3.067639  | -1.434791 | -2.579600 |
| H | 2.421468  | -2.327234 | -2.574371 |
| H | 2.443871  | -0.580487 | -2.883209 |
| H | 3.834219  | -1.584627 | -3.351075 |
| C | 7.280575  | -1.292189 | 0.188276  |
| H | 7.556325  | -2.352833 | 0.313893  |
| H | 7.771561  | -0.934655 | -0.728435 |
| H | 7.690629  | -0.740567 | 1.045887  |
| O | -0.167470 | 5.268875  | 0.948552  |
| C | 0.279613  | 6.300628  | 0.044152  |
| H | -0.180054 | 6.176440  | -0.948260 |
| H | -0.054066 | 7.242918  | 0.491833  |
| H | 1.377090  | 6.297764  | -0.042375 |

|                                              |                             |
|----------------------------------------------|-----------------------------|
| Zero-point correction=                       | 0.314065 (Hartree/Particle) |
| Thermal correction to Energy=                | 0.347268                    |
| Thermal correction to Enthalpy=              | 0.348212                    |
| Thermal correction to Gibbs Free Energy=     | 0.239851                    |
| Sum of electronic and zero-point Energies=   | -1965.114203                |
| Sum of electronic and thermal Energies=      | -1965.081000                |
| Sum of electronic and thermal Enthalpies=    | -1965.080055                |
| Sum of electronic and thermal Free Energies= | -1965.188417                |
| E(RB-P86) =                                  | -1965.42826773 A.U.         |

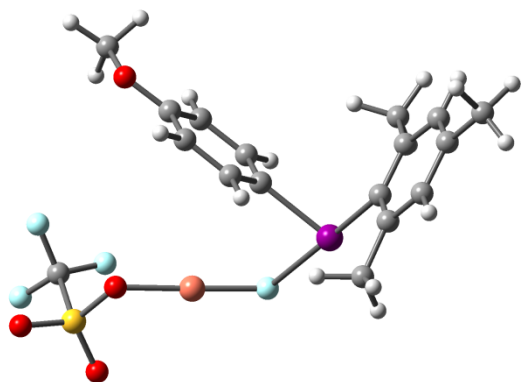

|   |          |           |           |
|---|----------|-----------|-----------|
| C | 3.885260 | -0.490036 | -0.103374 |
| C | 4.547971 | 0.453053  | -0.914315 |
| C | 4.481379 | -1.097722 | 1.021487  |
| C | 5.854630 | 0.805805  | -0.540880 |
| C | 5.792797 | -0.705852 | 1.332476  |
| C | 6.491611 | 0.244941  | 0.574608  |
| H | 6.388958 | 1.538727  | -1.152447 |
| H | 6.280400 | -1.165819 | 2.196914  |
| I | 1.894605 | -1.105884 | -0.632892 |
| C | 0.890643 | 0.689733  | -0.106951 |
| C | 0.909328 | 1.127254  | 1.222399  |
| C | 0.216720 | 1.388665  | -1.107852 |
| C | 0.238577 | 2.302749  | 1.545479  |

|    |           |           |           |
|----|-----------|-----------|-----------|
| H  | 1.432368  | 0.571486  | 2.001330  |
| C  | -0.465409 | 2.564101  | -0.775267 |
| H  | 0.208218  | 1.034296  | -2.139167 |
| C  | -0.452930 | 3.027234  | 0.552987  |
| Cu | -1.883816 | -1.218628 | -0.173267 |
| F  | -0.520388 | -1.819641 | -1.244661 |
| C  | -5.368585 | 0.118008  | -0.438317 |
| S  | -4.666020 | -1.037302 | 0.886595  |
| F  | -5.244900 | 1.408738  | -0.061816 |
| F  | -6.679217 | -0.148285 | -0.632242 |
| F  | -4.720123 | -0.049584 | -1.612614 |
| O  | -4.826657 | -2.385094 | 0.325850  |
| O  | -5.409725 | -0.693730 | 2.102857  |
| O  | -3.216524 | -0.566652 | 0.984076  |
| C  | 7.888543  | 0.664725  | 0.961122  |
| H  | 7.856829  | 1.454606  | 1.730546  |
| H  | 8.458029  | -0.176640 | 1.382306  |
| H  | 8.439991  | 1.065983  | 0.099070  |
| C  | 3.799853  | -2.141090 | 1.876423  |
| H  | 2.849719  | -1.776332 | 2.296456  |
| H  | 3.573600  | -3.054697 | 1.303870  |
| H  | 4.449156  | -2.426839 | 2.714668  |
| C  | 3.926762  | 1.085543  | -2.134855 |
| H  | 3.571821  | 0.326085  | -2.849475 |
| H  | 3.062569  | 1.715573  | -1.870421 |
| H  | 4.658604  | 1.721117  | -2.650800 |
| H  | -0.991219 | 3.107192  | -1.559861 |
| H  | 0.233105  | 2.671025  | 2.573134  |
| O  | -1.075925 | 4.159007  | 0.978717  |
| C  | -1.795168 | 4.940410  | 0.002681  |
| H  | -2.215240 | 5.785218  | 0.559174  |
| H  | -1.115606 | 5.311607  | -0.780151 |
| H  | -2.608007 | 4.351880  | -0.449733 |

|                                              |                             |
|----------------------------------------------|-----------------------------|
| Zero-point correction=                       | 0.314164 (Hartree/Particle) |
| Thermal correction to Energy=                | 0.347323                    |
| Thermal correction to Enthalpy=              | 0.348267                    |
| Thermal correction to Gibbs Free Energy=     | 0.240388                    |
| Sum of electronic and zero-point Energies=   | -1965.116015                |
| Sum of electronic and thermal Energies=      | -1965.082856                |
| Sum of electronic and thermal Enthalpies=    | -1965.081911                |
| Sum of electronic and thermal Free Energies= | -1965.189791                |
| E(RB-P86) =                                  | -1965.43017889 A.U.         |

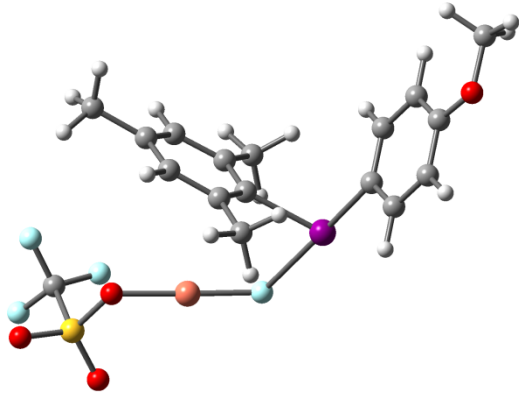

|    |           |           |           |
|----|-----------|-----------|-----------|
| C  | 3.743304  | -0.654553 | -0.043352 |
| C  | 4.337370  | 0.132129  | -1.033258 |
| C  | 4.466634  | -1.060611 | 1.088612  |
| C  | 5.667134  | 0.540062  | -0.888711 |
| H  | 3.783568  | 0.437328  | -1.922430 |
| C  | 5.794046  | -0.665721 | 1.226554  |
| H  | 4.007088  | -1.681545 | 1.859982  |
| C  | 6.401276  | 0.141516  | 0.244026  |
| I  | 1.735482  | -1.335683 | -0.269423 |
| C  | 0.752414  | 0.561010  | -0.056974 |
| C  | 0.722472  | 1.160068  | 1.215920  |
| C  | 0.163717  | 1.115821  | -1.208539 |
| C  | 0.078215  | 2.404833  | 1.301408  |
| C  | -0.469907 | 2.358755  | -1.043103 |
| C  | -0.516060 | 3.021003  | 0.191108  |
| H  | 0.036353  | 2.896974  | 2.277364  |
| H  | -0.945326 | 2.814508  | -1.916289 |
| Cu | -2.040399 | -1.065031 | 0.174549  |
| F  | -0.703912 | -2.119640 | -0.519650 |
| C  | -5.426626 | 0.286227  | -0.775561 |
| S  | -4.839484 | -0.362056 | 0.903340  |
| F  | -5.255422 | 1.622947  | -0.857959 |
| F  | -6.739404 | 0.011082  | -0.940886 |
| F  | -4.737456 | -0.296317 | -1.781995 |
| O  | -5.058478 | -1.812992 | 0.838270  |
| O  | -5.603973 | 0.416302  | 1.883202  |
| O  | -3.369015 | 0.050409  | 0.904998  |
| C  | 1.328859  | 0.545845  | 2.451377  |
| H  | 0.964872  | -0.480391 | 2.616005  |
| H  | 2.427166  | 0.499351  | 2.380425  |
| H  | 1.075362  | 1.143213  | 3.336854  |
| C  | 0.154602  | 0.445931  | -2.560351 |
| H  | 1.170486  | 0.348131  | -2.975029 |
| H  | -0.278624 | -0.564123 | -2.497314 |
| H  | -0.442260 | 1.034120  | -3.269794 |
| C  | -1.178989 | 4.370062  | 0.322728  |
| H  | -0.426589 | 5.175991  | 0.290785  |
| H  | -1.891827 | 4.548832  | -0.494294 |



|   |           |           |           |
|---|-----------|-----------|-----------|
| H | -1.712294 | 4.461735  | 1.280296  |
| H | 6.376565  | -0.970168 | 2.098339  |
| H | 6.117491  | 1.157875  | -1.665212 |
| O | 7.698369  | 0.480802  | 0.478115  |
| C | 8.365112  | 1.308685  | -0.496647 |
| H | 9.376224  | 1.462783  | -0.104367 |
| H | 8.418309  | 0.801429  | -1.472484 |
| H | 7.855253  | 2.278746  | -0.602458 |

### G-I: TS's

|                                              |                             |
|----------------------------------------------|-----------------------------|
| Zero-point correction=                       | 0.312775 (Hartree/Particle) |
| Thermal correction to Energy=                | 0.345442                    |
| Thermal correction to Enthalpy=              | 0.346386                    |
| Thermal correction to Gibbs Free Energy=     | 0.241781                    |
| Sum of electronic and zero-point Energies=   | -1965.099029                |
| Sum of electronic and thermal Energies=      | -1965.066362                |
| Sum of electronic and thermal Enthalpies=    | -1965.065418                |
| Sum of electronic and thermal Free Energies= | -1965.170023                |
| E(RB-P86) =                                  | -1965.41180459 A.U.         |

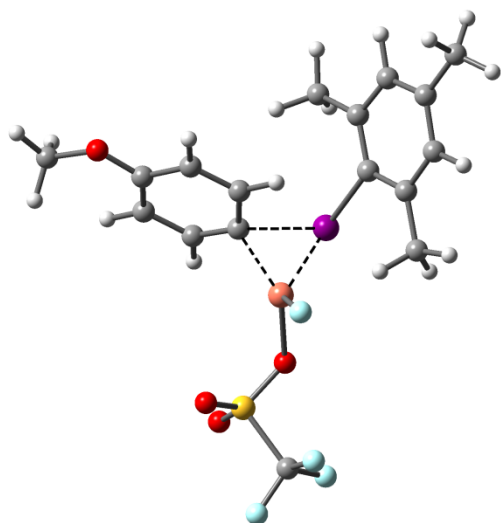

|   |           |           |           |
|---|-----------|-----------|-----------|
| O | -2.516325 | -0.644011 | -0.525888 |
| C | 2.638555  | -1.304457 | -0.408632 |
| C | 3.840127  | -0.689912 | -0.825991 |
| C | 2.559342  | -2.318431 | 0.570042  |
| C | 5.011245  | -1.131530 | -0.197148 |
| C | 3.776401  | -2.703779 | 1.154129  |
| C | 5.002192  | -2.127400 | 0.793139  |
| H | 5.960804  | -0.679364 | -0.496378 |
| H | 3.755775  | -3.486879 | 1.916831  |
| I | 0.852960  | -0.707512 | -1.383573 |
| C | 0.447966  | 1.369250  | 0.056827  |
| C | 1.482691  | 1.613416  | 0.970349  |
| C | -0.147017 | 2.386515  | -0.698544 |
| C | 1.780033  | 2.935618  | 1.276886  |

|    |           |           |           |
|----|-----------|-----------|-----------|
| H  | 2.005311  | 0.802085  | 1.479579  |
| C  | 0.151242  | 3.714244  | -0.375320 |
| H  | -0.862402 | 2.173802  | -1.494086 |
| C  | 1.112572  | 3.992379  | 0.615671  |
| H  | 2.528619  | 3.171620  | 2.035695  |
| H  | -0.359059 | 4.512446  | -0.913647 |
| Cu | -0.784193 | -0.076753 | 0.507609  |
| C  | -4.896933 | -1.413843 | 0.332158  |
| F  | -0.792333 | -0.632504 | 2.328420  |
| F  | -6.154140 | -0.993214 | 0.602881  |
| F  | -4.965894 | -2.373907 | -0.617945 |
| F  | -4.381458 | -1.962294 | 1.454448  |
| S  | -3.839502 | 0.037710  | -0.258859 |
| O  | -4.512312 | 0.494614  | -1.483912 |
| O  | -3.808537 | 0.965475  | 0.883736  |
| C  | 3.912705  | 0.379745  | -1.885853 |
| H  | 3.546414  | 0.013609  | -2.858012 |
| H  | 3.308529  | 1.260367  | -1.615714 |
| H  | 4.950496  | 0.711182  | -2.020060 |
| C  | 1.276255  | -2.970636 | 1.012380  |
| H  | 0.596393  | -2.242232 | 1.491586  |
| H  | 0.738104  | -3.423623 | 0.165050  |
| H  | 1.489086  | -3.764320 | 1.740627  |
| C  | 6.282850  | -2.550559 | 1.465689  |
| H  | 7.116419  | -2.591648 | 0.749224  |
| H  | 6.563301  | -1.824549 | 2.247512  |
| H  | 6.179894  | -3.533361 | 1.945940  |
| O  | 1.488764  | 5.239101  | 0.989904  |
| C  | 0.879329  | 6.364353  | 0.319618  |
| H  | -0.210439 | 6.365673  | 0.474058  |
| H  | 1.321536  | 7.251672  | 0.784625  |
| H  | 1.112359  | 6.350135  | -0.755734 |

|                                              |                             |
|----------------------------------------------|-----------------------------|
| Zero-point correction=                       | 0.312780 (Hartree/Particle) |
| Thermal correction to Energy=                | 0.345335                    |
| Thermal correction to Enthalpy=              | 0.346280                    |
| Thermal correction to Gibbs Free Energy=     | 0.242196                    |
| Sum of electronic and zero-point Energies=   | -1965.098125                |
| Sum of electronic and thermal Energies=      | -1965.065570                |
| Sum of electronic and thermal Enthalpies=    | -1965.064626                |
| Sum of electronic and thermal Free Energies= | -1965.168709                |
| E(RB-P86) = -1965.41090517                   | A.U.                        |

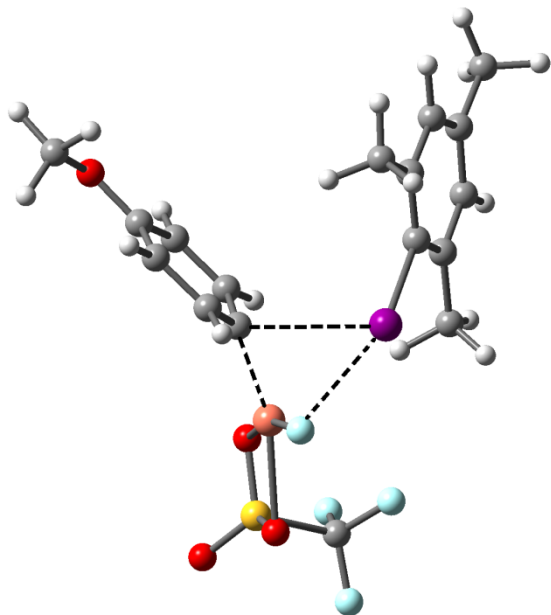

|    |           |           |           |
|----|-----------|-----------|-----------|
| C  | 2.160503  | -1.695739 | 0.377768  |
| C  | 1.727263  | -2.730257 | -0.483263 |
| C  | 3.512242  | -1.295475 | 0.472264  |
| C  | 2.706805  | -3.377724 | -1.248409 |
| C  | 4.440970  | -1.986156 | -0.320987 |
| C  | 4.064494  | -3.027152 | -1.181881 |
| H  | 2.393520  | -4.182947 | -1.919540 |
| H  | 5.493501  | -1.694187 | -0.261664 |
| I  | 0.730790  | -0.702214 | 1.585853  |
| C  | 0.225692  | 1.723958  | 0.093346  |
| C  | 0.738918  | 2.791497  | 0.827806  |
| C  | 0.637619  | 1.435368  | -1.211624 |
| C  | 1.536721  | 3.732460  | 0.163909  |
| H  | 0.482572  | 2.923216  | 1.879057  |
| C  | 1.437703  | 2.370869  | -1.863285 |
| H  | 0.302520  | 0.542921  | -1.740702 |
| C  | 1.884191  | 3.525496  | -1.185124 |
| Cu | -1.490574 | 1.043875  | 0.684218  |
| F  | -1.214914 | 1.264012  | 2.537653  |
| C  | -4.057135 | -1.505586 | -0.795746 |
| S  | -3.730588 | 0.352963  | -0.648662 |
| F  | -3.182321 | -2.198120 | -0.043152 |
| F  | -5.307430 | -1.778316 | -0.373941 |
| F  | -3.934387 | -1.893063 | -2.080224 |
| O  | -3.682485 | 0.618003  | 0.823448  |
| O  | -4.792368 | 0.981959  | -1.428237 |
| O  | -2.319818 | 0.528927  | -1.173969 |
| C  | 0.286622  | -3.158632 | -0.598781 |
| H  | -0.092762 | -3.554816 | 0.356887  |
| H  | -0.364580 | -2.316592 | -0.878793 |
| H  | 0.179656  | -3.943779 | -1.359247 |

|   |          |           |           |
|---|----------|-----------|-----------|
| C | 3.985911 | -0.183698 | 1.374916  |
| H | 3.474544 | 0.765629  | 1.151177  |
| H | 3.789739 | -0.413920 | 2.434605  |
| H | 5.066321 | -0.026884 | 1.255008  |
| C | 5.090525 | -3.765815 | -2.004473 |
| H | 5.318435 | -4.745901 | -1.552200 |
| H | 4.722085 | -3.959692 | -3.023128 |
| H | 6.032542 | -3.204058 | -2.073349 |
| H | 1.724537 | 2.219680  | -2.906135 |
| H | 1.879533 | 4.610790  | 0.710992  |
| O | 2.665010 | 4.365585  | -1.915822 |
| C | 3.207043 | 5.529617  | -1.258129 |
| H | 3.860792 | 5.237785  | -0.422079 |
| H | 3.792941 | 6.049265  | -2.023893 |
| H | 2.400496 | 6.186441  | -0.897174 |

|                                              |                             |
|----------------------------------------------|-----------------------------|
| Zero-point correction=                       | 0.312292 (Hartree/Particle) |
| Thermal correction to Energy=                | 0.345118                    |
| Thermal correction to Enthalpy=              | 0.346062                    |
| Thermal correction to Gibbs Free Energy=     | 0.240680                    |
| Sum of electronic and zero-point Energies=   | -1965.096926                |
| Sum of electronic and thermal Energies=      | -1965.064100                |
| Sum of electronic and thermal Enthalpies=    | -1965.063156                |
| Sum of electronic and thermal Free Energies= | -1965.168538                |
| E(RB-P86) =                                  | -1965.40921803 A.U          |

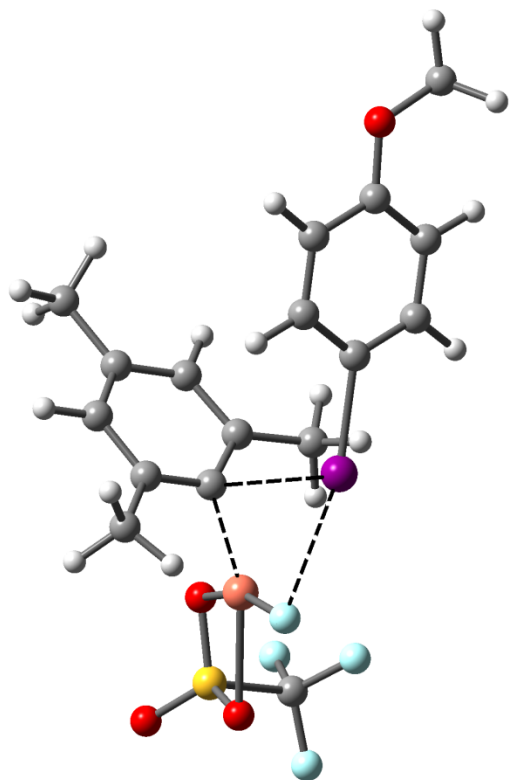

|    |           |           |           |
|----|-----------|-----------|-----------|
| C  | -3.366437 | -0.953949 | -0.181018 |
| C  | -3.785303 | -1.332303 | 1.101708  |
| C  | -4.198034 | -0.157105 | -0.989740 |
| C  | -5.036981 | -0.932925 | 1.578994  |
| H  | -3.144428 | -1.946306 | 1.736827  |
| C  | -5.442233 | 0.243814  | -0.517569 |
| H  | -3.876134 | 0.145922  | -1.987607 |
| C  | -5.871783 | -0.139782 | 0.769868  |
| I  | -1.488612 | -1.562871 | -0.906899 |
| C  | 0.313299  | 0.921580  | -0.491166 |
| C  | 0.015768  | 1.678148  | -1.622268 |
| C  | 0.032831  | 1.261823  | 0.837879  |
| C  | -0.443570 | 2.987742  | -1.356481 |
| C  | -0.425410 | 2.577524  | 1.022996  |
| C  | -0.666058 | 3.449438  | -0.054723 |
| H  | -0.646551 | 3.640300  | -2.211792 |
| H  | -0.608190 | 2.914525  | 2.048453  |
| Cu | 1.883647  | -0.257697 | -0.728689 |
| F  | 1.208067  | -1.634453 | -1.735038 |
| C  | 4.904526  | -0.672476 | 1.645458  |
| S  | 4.443283  | 0.193280  | 0.026834  |
| F  | 3.917652  | -1.505459 | 2.027677  |
| F  | 6.034446  | -1.384605 | 1.470228  |
| F  | 5.107969  | 0.240281  | 2.614638  |
| O  | 4.090474  | -0.908490 | -0.913844 |
| O  | 5.586550  | 1.044005  | -0.286932 |
| O  | 3.153075  | 0.925592  | 0.363510  |
| C  | 0.248237  | 0.339170  | 2.009930  |
| H  | -0.060891 | 0.823916  | 2.945437  |
| H  | -0.331039 | -0.589450 | 1.888699  |
| H  | 1.308769  | 0.057717  | 2.102948  |
| C  | -1.175987 | 4.848144  | 0.196565  |
| H  | -1.964458 | 4.854059  | 0.964095  |
| H  | -0.362999 | 5.497263  | 0.562994  |
| H  | -1.577357 | 5.300387  | -0.720799 |
| C  | 0.182829  | 1.200207  | -3.044851 |
| H  | 0.401800  | 0.125366  | -3.078946 |
| H  | -0.734728 | 1.394994  | -3.620315 |
| H  | 1.002936  | 1.743165  | -3.542002 |
| H  | -5.347697 | -1.243900 | 2.576344  |
| H  | -6.101030 | 0.858518  | -1.134475 |
| O  | -7.104477 | 0.307255  | 1.137707  |
| C  | -7.588219 | -0.048389 | 2.448593  |
| H  | -6.927006 | 0.351905  | 3.232690  |
| H  | -8.578665 | 0.412779  | 2.528418  |
| H  | -7.677229 | -1.140998 | 2.551179  |

**J: adduct**

|                                 |                             |
|---------------------------------|-----------------------------|
| Zero-point correction=          | 0.389350 (Hartree/Particle) |
| Thermal correction to Energy=   | 0.420820                    |
| Thermal correction to Enthalpy= | 0.421764                    |

Thermal correction to Gibbs Free Energy= 0.319587  
 Sum of electronic and zero-point Energies= -1251.733783  
 Sum of electronic and thermal Energies= -1251.702314  
 Sum of electronic and thermal Enthalpies= -1251.701369  
 Sum of electronic and thermal Free Energies= -1251.803546  
 E(RB-P86) = -1252.12313312 A.U

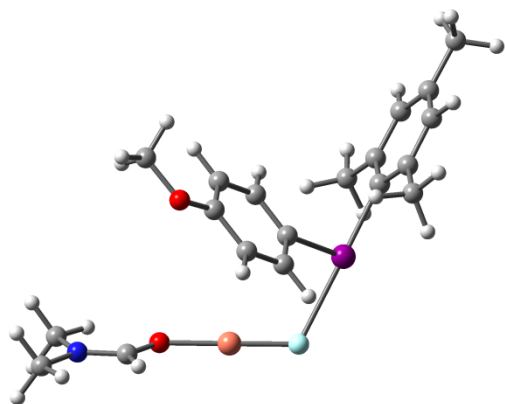

|    |           |           |           |
|----|-----------|-----------|-----------|
| C  | -3.189478 | -0.423210 | 0.119169  |
| C  | -3.640506 | -0.880354 | 1.373720  |
| C  | -3.919270 | 0.476042  | -0.686629 |
| C  | -4.875128 | -0.381184 | 1.821827  |
| C  | -5.140350 | 0.938902  | -0.175048 |
| C  | -5.635908 | 0.524058  | 1.070325  |
| H  | -5.247535 | -0.716185 | 2.794255  |
| H  | -5.720277 | 1.644773  | -0.776969 |
| I  | -1.328526 | -1.202506 | -0.615164 |
| C  | -0.212225 | 0.606708  | -0.527389 |
| C  | 0.442527  | 1.036673  | -1.687625 |
| C  | -0.150301 | 1.319521  | 0.667556  |
| C  | 1.183040  | 2.213513  | -1.636312 |
| H  | 0.383767  | 0.467493  | -2.615499 |
| C  | 0.589462  | 2.507075  | 0.710907  |
| H  | -0.665657 | 0.978565  | 1.566340  |
| C  | 1.261769  | 2.955817  | -0.440451 |
| H  | 1.704525  | 2.577443  | -2.523697 |
| H  | 0.635196  | 3.063400  | 1.646740  |
| Cu | 2.419904  | -1.682064 | -0.525974 |
| F  | 0.938160  | -2.109800 | -1.514485 |
| C  | 4.890974  | -0.599550 | 0.193677  |
| H  | 4.959936  | -0.141971 | -0.804313 |
| O  | 3.898246  | -1.313009 | 0.539514  |
| N  | 5.916902  | -0.352430 | 1.003126  |
| C  | 5.972863  | -0.889740 | 2.364175  |
| H  | 6.038214  | -0.059650 | 3.082715  |
| H  | 5.070267  | -1.478176 | 2.556417  |
| H  | 6.863518  | -1.526125 | 2.471018  |
| C  | 7.043650  | 0.471025  | 0.561008  |
| H  | 7.140486  | 1.349968  | 1.215091  |

|   |           |           |           |
|---|-----------|-----------|-----------|
| H | 7.973141  | -0.115047 | 0.608590  |
| H | 6.877748  | 0.803874  | -0.470752 |
| C | -3.445151 | 0.954362  | -2.035919 |
| H | -2.520237 | 1.547374  | -1.953070 |
| H | -3.233675 | 0.111638  | -2.713380 |
| H | -4.208408 | 1.586381  | -2.508698 |
| C | -2.887468 | -1.868824 | 2.233665  |
| H | -2.804144 | -2.852855 | 1.745122  |
| H | -1.864884 | -1.528555 | 2.458264  |
| H | -3.410764 | -2.015863 | 3.187746  |
| C | -6.967293 | 1.025585  | 1.573441  |
| H | -7.795994 | 0.516664  | 1.053305  |
| H | -7.085468 | 0.841070  | 2.650258  |
| H | -7.083481 | 2.103892  | 1.387890  |
| O | 2.009889  | 4.091087  | -0.501159 |
| C | 2.117186  | 4.891617  | 0.693646  |
| H | 2.596469  | 4.322866  | 1.505555  |
| H | 2.747309  | 5.743918  | 0.417154  |
| H | 1.127384  | 5.250154  | 1.016038  |

#### J: TS

|                                              |                             |
|----------------------------------------------|-----------------------------|
| Zero-point correction=                       | 0.387743 (Hartree/Particle) |
| Thermal correction to Energy=                | 0.418685                    |
| Thermal correction to Enthalpy=              | 0.419629                    |
| Thermal correction to Gibbs Free Energy=     | 0.320229                    |
| Sum of electronic and zero-point Energies=   | -1251.715257                |
| Sum of electronic and thermal Energies=      | -1251.684315                |
| Sum of electronic and thermal Enthalpies=    | -1251.683371                |
| Sum of electronic and thermal Free Energies= | -1251.782771                |
| E(RB-P86) =                                  | -1252.1030008 A.U           |

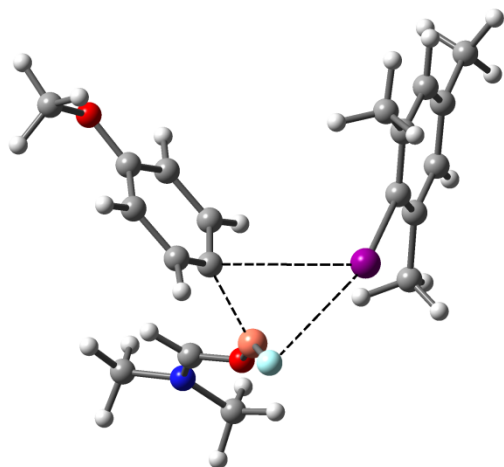

|   |           |           |           |
|---|-----------|-----------|-----------|
| C | -2.643079 | -0.102996 | -0.153520 |
| C | -2.825633 | -1.336479 | 0.510406  |
| C | -3.348075 | 1.069904  | 0.200759  |
| C | -3.760473 | -1.366864 | 1.556598  |
| C | -4.267124 | 0.968648  | 1.254549  |

|    |           |           |           |
|----|-----------|-----------|-----------|
| C  | -4.488122 | -0.232973 | 1.946155  |
| H  | -3.923975 | -2.313972 | 2.079023  |
| H  | -4.829214 | 1.862616  | 1.540566  |
| I  | -1.261390 | -0.002900 | -1.756989 |
| C  | 1.641468  | 0.840691  | -0.342287 |
| C  | 2.259793  | 1.931448  | -0.930776 |
| C  | 1.143436  | 0.825448  | 0.956854  |
| C  | 2.564591  | 3.024834  | -0.102200 |
| H  | 2.542710  | 1.938476  | -1.982554 |
| C  | 1.444694  | 1.923040  | 1.765332  |
| H  | 0.568659  | -0.007291 | 1.362322  |
| C  | 2.162033  | 3.019928  | 1.245345  |
| H  | 3.115510  | 3.861840  | -0.531531 |
| H  | 1.122997  | 1.935500  | 2.808876  |
| Cu | 1.627629  | -0.780781 | -1.386152 |
| F  | 1.599131  | -0.060029 | -3.063279 |
| C  | 2.790236  | -2.128041 | 0.827514  |
| H  | 3.339460  | -1.206319 | 1.067824  |
| O  | 1.904134  | -2.143029 | -0.092337 |
| N  | 3.094652  | -3.192468 | 1.548136  |
| C  | 2.449165  | -4.491104 | 1.329515  |
| H  | 1.968658  | -4.816310 | 2.263022  |
| H  | 1.702031  | -4.398077 | 0.535573  |
| H  | 3.211236  | -5.229393 | 1.041560  |
| C  | 4.113827  | -3.121785 | 2.600267  |
| H  | 3.660154  | -3.386341 | 3.565867  |
| H  | 4.922667  | -3.831009 | 2.374816  |
| H  | 4.522610  | -2.106158 | 2.654268  |
| C  | -3.159507 | 2.391029  | -0.500989 |
| H  | -2.112774 | 2.729842  | -0.448815 |
| H  | -3.422052 | 2.321748  | -1.568930 |
| H  | -3.793334 | 3.162518  | -0.043455 |
| C  | -2.080082 | -2.593087 | 0.140083  |
| H  | -2.283874 | -2.890308 | -0.901217 |
| H  | -0.990291 | -2.457073 | 0.227386  |
| H  | -2.375674 | -3.422472 | 0.796583  |
| C  | -5.465713 | -0.293432 | 3.093121  |
| H  | -6.344482 | 0.340863  | 2.904268  |
| H  | -5.807238 | -1.321971 | 3.276716  |
| H  | -4.997173 | 0.071157  | 4.023259  |
| O  | 2.398182  | 4.032364  | 2.123045  |
| C  | 3.076774  | 5.206699  | 1.631511  |
| H  | 2.496205  | 5.688572  | 0.829942  |
| H  | 3.151817  | 5.880304  | 2.491913  |
| H  | 4.085268  | 4.952987  | 1.269006  |

**K, L: adducts**

|                                          |                             |
|------------------------------------------|-----------------------------|
| Zero-point correction=                   | 0.289429 (Hartree/Particle) |
| Thermal correction to Energy=            | 0.314970                    |
| Thermal correction to Enthalpy=          | 0.315915                    |
| Thermal correction to Gibbs Free Energy= | 0.227907                    |



Sum of electronic and zero-point Energies= -1103.278719  
 Sum of electronic and thermal Energies= -1103.253177  
 Sum of electronic and thermal Enthalpies= -1103.252233  
 Sum of electronic and thermal Free Energies= -1103.340241  
 E(RB-P86) = -1103.56814770 A.U.

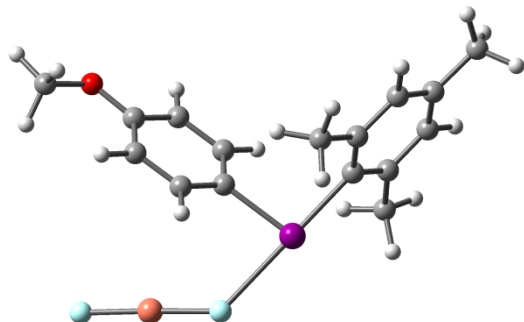

|    |           |           |           |
|----|-----------|-----------|-----------|
| C  | 2.459861  | -0.334257 | 0.106780  |
| C  | 3.223513  | -0.610335 | -1.046835 |
| C  | 2.917490  | 0.487169  | 1.156850  |
| C  | 4.488501  | -0.007441 | -1.129751 |
| C  | 4.189536  | 1.062529  | 1.007153  |
| C  | 4.988019  | 0.829119  | -0.120783 |
| H  | 5.098860  | -0.200317 | -2.016962 |
| H  | 4.562810  | 1.712595  | 1.803905  |
| I  | 0.533365  | -1.270634 | 0.286722  |
| C  | -0.619669 | 0.488054  | -0.030150 |
| C  | -1.582720 | 0.836186  | 0.915092  |
| C  | -0.396739 | 1.248668  | -1.181999 |
| C  | -2.350083 | 1.988967  | 0.707884  |
| H  | -1.743693 | 0.233263  | 1.809173  |
| C  | -1.159209 | 2.395685  | -1.381227 |
| H  | 0.357561  | 0.965095  | -1.917012 |
| C  | -2.139928 | 2.772161  | -0.440882 |
| H  | -3.100939 | 2.260770  | 1.449229  |
| H  | -1.010992 | 3.010710  | -2.270920 |
| Cu | -3.397850 | -1.787005 | -0.043295 |
| F  | -5.038149 | -1.246239 | -0.595701 |
| F  | -1.753693 | -2.382402 | 0.528856  |
| C  | 2.112429  | 0.772436  | 2.400615  |
| H  | 1.175743  | 1.303039  | 2.166540  |
| H  | 1.839233  | -0.155649 | 2.927612  |
| H  | 2.688860  | 1.398709  | 3.094233  |
| C  | 2.758742  | -1.511762 | -2.167453 |
| H  | 2.599886  | -2.545163 | -1.820536 |
| H  | 1.810717  | -1.167989 | -2.609748 |
| H  | 3.510602  | -1.540361 | -2.967263 |
| C  | 6.363110  | 1.440314  | -0.236455 |
| H  | 7.136140  | 0.719255  | 0.078662  |
| H  | 6.588870  | 1.724694  | -1.274764 |
| H  | 6.461860  | 2.330562  | 0.400639  |

|   |           |          |           |
|---|-----------|----------|-----------|
| O | -2.829613 | 3.908540 | -0.735115 |
| C | -3.853500 | 4.332414 | 0.187471  |
| H | -3.422971 | 4.557959 | 1.175562  |
| H | -4.277939 | 5.243897 | -0.247363 |
| H | -4.637915 | 3.565690 | 0.282993  |

|                                              |                             |
|----------------------------------------------|-----------------------------|
| Zero-point correction=                       | 0.289649 (Hartree/Particle) |
| Thermal correction to Energy=                | 0.314986                    |
| Thermal correction to Enthalpy=              | 0.315930                    |
| Thermal correction to Gibbs Free Energy=     | 0.230176                    |
| Sum of electronic and zero-point Energies=   | -1103.280280                |
| Sum of electronic and thermal Energies=      | -1103.254943                |
| Sum of electronic and thermal Enthalpies=    | -1103.253999                |
| Sum of electronic and thermal Free Energies= | -1103.339753                |
| E(RB-P86) =                                  | -1103.56992868 A.U.         |

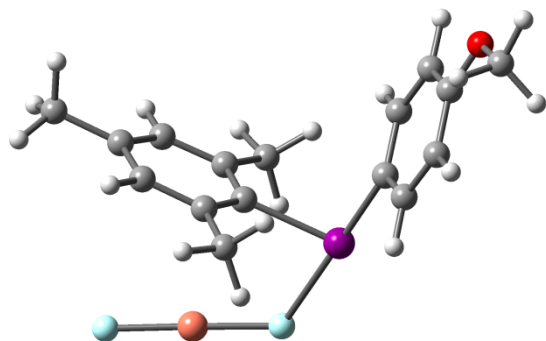

|    |           |           |           |
|----|-----------|-----------|-----------|
| C  | -2.222330 | -0.554226 | 0.186575  |
| C  | -2.716927 | 0.080075  | 1.336492  |
| C  | -3.035399 | -0.745435 | -0.933607 |
| C  | -4.029044 | 0.540612  | 1.348563  |
| H  | -2.093010 | 0.217509  | 2.220845  |
| C  | -4.359476 | -0.291592 | -0.919410 |
| H  | -2.654536 | -1.249838 | -1.823857 |
| C  | -4.858444 | 0.360246  | 0.222168  |
| H  | -4.434522 | 1.041099  | 2.230235  |
| H  | -4.982647 | -0.447880 | -1.799668 |
| I  | -0.234543 | -1.329121 | 0.140663  |
| C  | 0.797190  | 0.550782  | 0.091029  |
| C  | 0.812956  | 1.270183  | -1.117833 |
| C  | 1.434139  | 0.974052  | 1.272555  |
| C  | 1.496921  | 2.496849  | -1.102404 |
| C  | 2.100255  | 2.208896  | 1.210743  |
| C  | 2.139046  | 2.984615  | 0.043844  |
| H  | 1.531118  | 3.079045  | -2.027709 |
| H  | 2.612877  | 2.563495  | 2.109398  |
| Cu | 3.610631  | -1.154757 | -0.313888 |
| F  | 5.077404  | -0.131592 | -0.617574 |
| F  | 2.142514  | -2.226162 | -0.004132 |
| C  | 1.465320  | 0.174534  | 2.551898  |
| H  | 2.061516  | 0.698369  | 3.310650  |

|   |           |           |           |
|---|-----------|-----------|-----------|
| H | 0.456728  | 0.018504  | 2.965274  |
| H | 1.914432  | -0.817947 | 2.389774  |
| C | 0.153639  | 0.802117  | -2.390521 |
| H | -0.943664 | 0.783083  | -2.294091 |
| H | 0.403866  | 1.478888  | -3.218146 |
| H | 0.478828  | -0.212122 | -2.669929 |
| C | 2.845291  | 4.318012  | 0.023792  |
| H | 3.270518  | 4.530647  | -0.967677 |
| H | 2.140878  | 5.133359  | 0.260234  |
| H | 3.653484  | 4.355183  | 0.767948  |
| O | -6.123618 | 0.849056  | 0.339849  |
| C | -7.012202 | 0.694651  | -0.785205 |
| H | -7.955435 | 1.158756  | -0.477013 |
| H | -6.615578 | 1.212329  | -1.672333 |
| H | -7.178311 | -0.369999 | -1.011841 |

### K, L: TS's

|                                              |                             |
|----------------------------------------------|-----------------------------|
| Zero-point correction=                       | 0.287814 (Hartree/Particle) |
| Thermal correction to Energy=                | 0.312947                    |
| Thermal correction to Enthalpy=              | 0.313891                    |
| Thermal correction to Gibbs Free Energy=     | 0.228583                    |
| Sum of electronic and zero-point Energies=   | -1103.266239                |
| Sum of electronic and thermal Energies=      | -1103.241106                |
| Sum of electronic and thermal Enthalpies=    | -1103.240162                |
| Sum of electronic and thermal Free Energies= | -1103.325470                |
| E(RB-P86) =                                  | -1103.55405274 A.U.         |

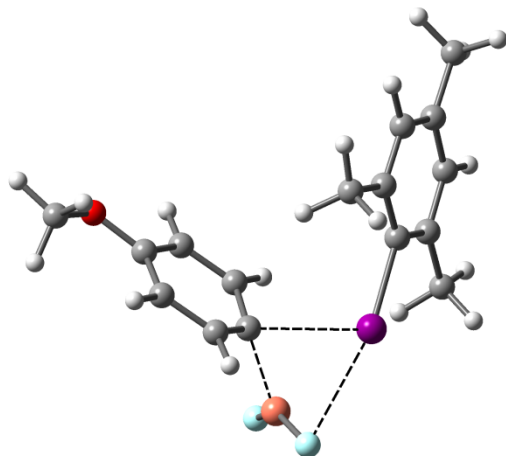

|   |           |           |           |
|---|-----------|-----------|-----------|
| C | -2.105654 | -0.044534 | -0.303232 |
| C | -2.936831 | -0.499750 | 0.744478  |
| C | -2.298791 | 1.196522  | -0.952033 |
| C | -4.001647 | 0.333048  | 1.120944  |
| C | -3.380781 | 1.978740  | -0.525816 |
| C | -4.244112 | 1.567609  | 0.501944  |
| H | -4.660401 | 0.000026  | 1.928130  |
| H | -3.548934 | 2.943066  | -1.014329 |
| I | -0.505762 | -1.283630 | -0.936041 |

|    |           |           |           |
|----|-----------|-----------|-----------|
| C  | 1.572707  | -0.059508 | 0.180607  |
| C  | 2.415277  | 0.443733  | -0.812553 |
| C  | 1.121402  | 0.722174  | 1.250885  |
| C  | 2.979133  | 1.713205  | -0.629848 |
| H  | 2.675874  | -0.156035 | -1.684681 |
| C  | 1.680817  | 1.986875  | 1.418410  |
| H  | 0.397473  | 0.346303  | 1.974264  |
| C  | 2.614553  | 2.487890  | 0.487002  |
| H  | 3.687650  | 2.081554  | -1.371953 |
| H  | 1.400589  | 2.601610  | 2.276523  |
| Cu | 1.896379  | -1.973168 | 0.552631  |
| F  | 1.992583  | -2.239388 | 2.385284  |
| F  | 2.008970  | -2.599752 | -1.231108 |
| C  | -2.739060 | -1.817267 | 1.452945  |
| H  | -2.819241 | -2.667333 | 0.756914  |
| H  | -1.746810 | -1.880038 | 1.926517  |
| H  | -3.498069 | -1.947249 | 2.236006  |
| C  | -1.407723 | 1.696273  | -2.061855 |
| H  | -0.359382 | 1.778455  | -1.734439 |
| H  | -1.424288 | 1.016752  | -2.929149 |
| H  | -1.736790 | 2.687789  | -2.400543 |
| C  | -5.412925 | 2.426665  | 0.915247  |
| H  | -6.258262 | 2.292037  | 0.219170  |
| H  | -5.768191 | 2.165473  | 1.921976  |
| H  | -5.149528 | 3.494675  | 0.900821  |
| O  | 3.090326  | 3.737710  | 0.746410  |
| C  | 4.006154  | 4.318689  | -0.203546 |
| H  | 3.533369  | 4.421807  | -1.192547 |
| H  | 4.250289  | 5.309254  | 0.195427  |
| H  | 4.923359  | 3.714506  | -0.284587 |

|                                              |                             |
|----------------------------------------------|-----------------------------|
| Zero-point correction=                       | 0.287623 (Hartree/Particle) |
| Thermal correction to Energy=                | 0.312824                    |
| Thermal correction to Enthalpy=              | 0.313768                    |
| Thermal correction to Gibbs Free Energy=     | 0.228523                    |
| Sum of electronic and zero-point Energies=   | -1103.267297                |
| Sum of electronic and thermal Energies=      | -1103.242095                |
| Sum of electronic and thermal Enthalpies=    | -1103.241151                |
| Sum of electronic and thermal Free Energies= | -1103.326396                |
| E(RB-P86) = -1103.55491923                   | A.U.                        |

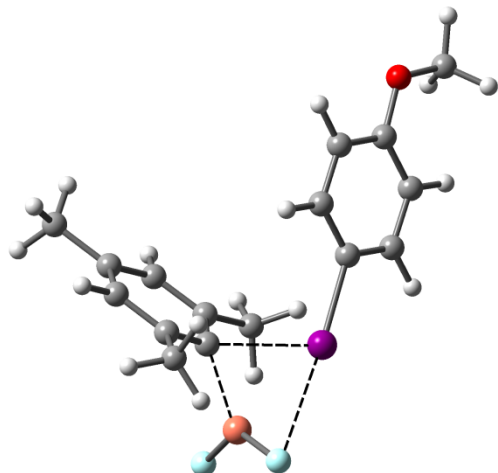

|    |           |           |           |
|----|-----------|-----------|-----------|
| C  | -1.804762 | -0.770773 | -0.351616 |
| C  | -2.624433 | -1.168655 | 0.712765  |
| C  | -2.274590 | 0.134463  | -1.319613 |
| C  | -3.927749 | -0.675737 | 0.811248  |
| H  | -2.261587 | -1.871209 | 1.465469  |
| C  | -3.567820 | 0.631934  | -1.217984 |
| H  | -1.638192 | 0.446790  | -2.149213 |
| C  | -4.404187 | 0.231686  | -0.153774 |
| H  | -4.556258 | -1.001894 | 1.639451  |
| H  | -3.954370 | 1.333950  | -1.959525 |
| I  | 0.137401  | -1.574940 | -0.515301 |
| C  | 1.500490  | 0.668593  | 0.073632  |
| C  | 1.945491  | 1.217556  | -1.138770 |
| C  | 0.880881  | 1.388921  | 1.110341  |
| C  | 1.906777  | 2.624125  | -1.217893 |
| C  | 0.864784  | 2.783797  | 0.950646  |
| C  | 1.370090  | 3.418020  | -0.197231 |
| H  | 2.294594  | 3.094865  | -2.126798 |
| H  | 0.444498  | 3.386340  | 1.762008  |
| Cu | 2.588618  | -0.875119 | 0.673492  |
| F  | 3.433480  | -0.296246 | 2.238261  |
| F  | 2.762259  | -2.367682 | -0.535762 |
| C  | 2.450121  | 0.413059  | -2.312692 |
| H  | 3.238866  | 0.963794  | -2.844715 |
| H  | 2.841948  | -0.567365 | -2.005651 |
| H  | 1.630086  | 0.235061  | -3.028699 |
| C  | 0.350351  | 0.754144  | 2.369842  |
| H  | 0.000146  | 1.524103  | 3.070304  |
| H  | -0.494190 | 0.079849  | 2.159830  |
| H  | 1.143131  | 0.165311  | 2.857303  |
| C  | 1.336030  | 4.921864  | -0.320887 |
| H  | 1.395027  | 5.240111  | -1.371232 |
| H  | 0.420066  | 5.340236  | 0.121814  |
| H  | 2.190094  | 5.373795  | 0.211591  |
| O  | -5.649132 | 0.776482  | -0.148411 |
| C  | -6.545447 | 0.407324  | 0.920660  |

|   |           |           |          |
|---|-----------|-----------|----------|
| H | -6.133055 | 0.704581  | 1.897038 |
| H | -7.471714 | 0.958543  | 0.726055 |
| H | -6.746036 | -0.674974 | 0.907420 |

#### f. Other copper species

##### Cu(OTf)(DMF)

|                                              |                             |
|----------------------------------------------|-----------------------------|
| Zero-point correction=                       | 0.127424 (Hartree/Particle) |
| Thermal correction to Energy=                | 0.144755                    |
| Thermal correction to Enthalpy=              | 0.145699                    |
| Thermal correction to Gibbs Free Energy=     | 0.076122                    |
| Sum of electronic and zero-point Energies=   | -1406.689427                |
| Sum of electronic and thermal Energies=      | -1406.672096                |
| Sum of electronic and thermal Enthalpies=    | -1406.671152                |
| Sum of electronic and thermal Free Energies= | -1406.740728                |
| E(RB-P86) =                                  | -1406.81685098 A.U          |

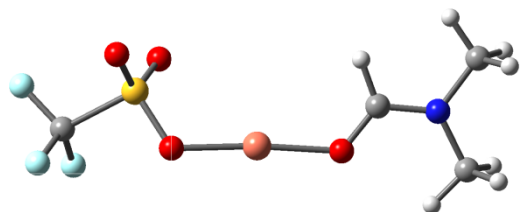

|    |           |           |           |
|----|-----------|-----------|-----------|
| Cu | -0.756642 | -0.524627 | -0.332784 |
| O  | -2.600810 | -0.651555 | -0.100857 |
| C  | -3.392365 | 0.340741  | -0.034600 |
| H  | -3.036442 | 1.376271  | -0.138054 |
| N  | -4.699682 | 0.206508  | 0.163546  |
| C  | -5.575095 | 1.378407  | 0.227031  |
| H  | -6.333255 | 1.318599  | -0.567426 |
| H  | -6.080349 | 1.411867  | 1.203268  |
| H  | -4.982477 | 2.291657  | 0.094360  |
| C  | -5.325515 | -1.107793 | 0.325319  |
| H  | -6.077150 | -1.255364 | -0.463855 |
| H  | -5.821047 | -1.158267 | 1.305912  |
| H  | -4.556920 | -1.883996 | 0.256959  |
| C  | 3.558570  | -0.266092 | 0.250254  |
| F  | 3.388551  | -1.201694 | 1.207735  |
| F  | 4.026045  | -0.868129 | -0.863481 |
| F  | 4.481575  | 0.623224  | 0.677141  |
| S  | 1.936051  | 0.634451  | -0.102807 |
| O  | 1.497401  | 1.166189  | 1.194654  |
| O  | 2.261184  | 1.594012  | -1.164307 |
| O  | 1.103736  | -0.550588 | -0.597102 |

#### g. Isomerization and reductive elimination reactions of Mes(Ar)IF (Figure 7 and Table 4)

Ar = Ph

TS\_ArF

|                        |                             |
|------------------------|-----------------------------|
| Zero-point correction= | 0.254225 (Hartree/Particle) |
|------------------------|-----------------------------|

Thermal correction to Energy= 0.272601  
 Thermal correction to Enthalpy= 0.273545  
 Thermal correction to Gibbs Free Energy= 0.205502  
 Sum of electronic and zero-point Energies= -692.355756  
 Sum of electronic and thermal Energies= -692.337380  
 Sum of electronic and thermal Enthalpies= -692.336436  
 Sum of electronic and thermal Free Energies= -692.404479  
 E(RB-P86) = -692.609980655 A.U

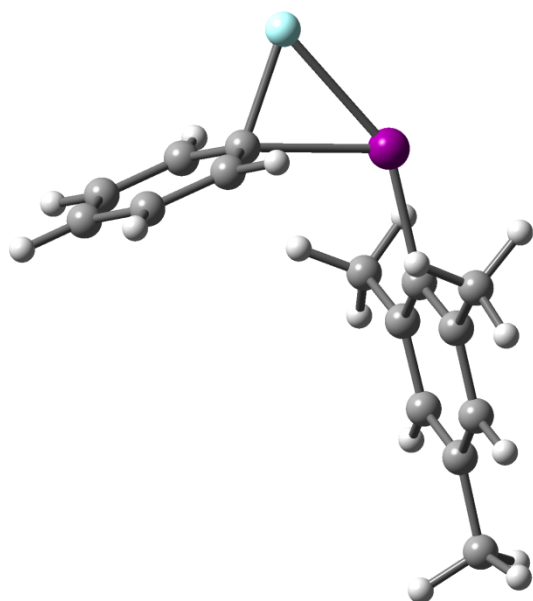

|   |           |           |           |
|---|-----------|-----------|-----------|
| C | 2.888979  | 2.349544  | -1.002780 |
| C | 2.439769  | 1.026182  | -1.124950 |
| C | 2.195124  | 0.311217  | 0.046368  |
| C | 2.366976  | 0.855720  | 1.317698  |
| C | 2.817062  | 2.181826  | 1.407112  |
| C | 3.077692  | 2.933507  | 0.255500  |
| H | 3.088933  | 2.919386  | -1.913941 |
| H | 2.958767  | 2.619088  | 2.398847  |
| I | 0.577405  | -1.402624 | -0.117485 |
| C | -1.304357 | -0.390192 | -0.043420 |
| C | -1.939363 | -0.236233 | 1.206629  |
| C | -1.868917 | 0.087078  | -1.247242 |
| C | -3.178045 | 0.427103  | 1.222121  |
| C | -3.106670 | 0.741270  | -1.162615 |
| C | -3.774654 | 0.926879  | 0.057559  |
| H | -3.688537 | 0.552308  | 2.181602  |
| H | -3.561321 | 1.115146  | -2.084952 |
| F | 3.128671  | -1.375569 | -0.057236 |
| C | -1.364782 | -0.753711 | 2.503928  |
| H | -1.195000 | -1.841342 | 2.467864  |
| H | -0.397606 | -0.282371 | 2.736916  |
| H | -2.050969 | -0.543674 | 3.335560  |
| C | -1.214135 | -0.083383 | -2.597465 |

|   |           |           |           |
|---|-----------|-----------|-----------|
| H | -0.241219 | 0.429748  | -2.644448 |
| H | -1.033908 | -1.144884 | -2.829776 |
| H | -1.853343 | 0.334011  | -3.387267 |
| C | -5.095827 | 1.655150  | 0.108872  |
| H | -5.568081 | 1.561920  | 1.096824  |
| H | -4.959387 | 2.729247  | -0.099786 |
| H | -5.794604 | 1.267204  | -0.648369 |
| H | 2.174039  | 0.273072  | 2.218444  |
| H | 3.423263  | 3.965799  | 0.337438  |
| H | 2.305354  | 0.572818  | -2.107005 |

**anti-isom**

|                                              |                             |
|----------------------------------------------|-----------------------------|
| Zero-point correction=                       | 0.255377 (Hartree/Particle) |
| Thermal correction to Energy=                | 0.274263                    |
| Thermal correction to Enthalpy=              | 0.275208                    |
| Thermal correction to Gibbs Free Energy=     | 0.206049                    |
| Sum of electronic and zero-point Energies=   | -692.386143                 |
| Sum of electronic and thermal Energies=      | -692.367257                 |
| Sum of electronic and thermal Enthalpies=    | -692.366313                 |
| Sum of electronic and thermal Free Energies= | -692.435471                 |
| E(RB-P86) =                                  | -692.641520354 A.U          |

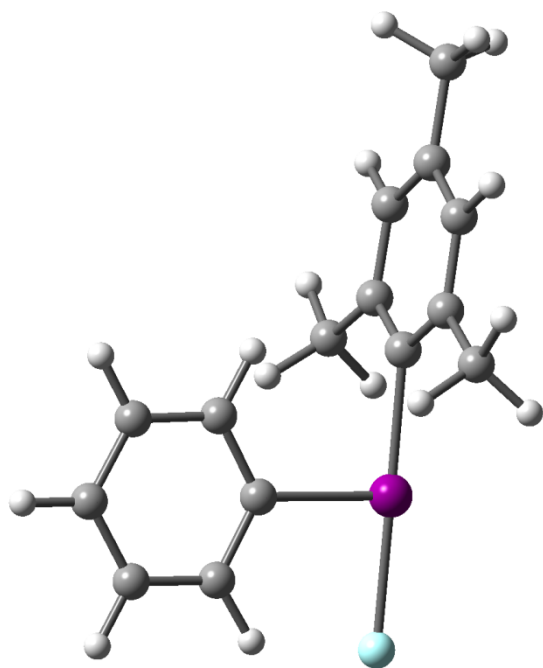

|   |          |           |           |
|---|----------|-----------|-----------|
| C | 3.175547 | 0.405279  | -1.202515 |
| C | 1.866121 | -0.096230 | -1.234812 |
| C | 1.224938 | -0.346087 | 0.000303  |
| C | 1.866949 | -0.110722 | 1.234766  |
| C | 3.179126 | 0.391864  | 1.204882  |
| C | 3.850142 | 0.653402  | 0.003220  |
| H | 3.681500 | 0.609660  | -2.151313 |
| H | 3.687536 | 0.585215  | 2.154414  |



|   |           |           |           |
|---|-----------|-----------|-----------|
| I | -0.742117 | -1.270815 | -0.002999 |
| C | -1.790278 | 0.623955  | 0.002340  |
| C | -3.182859 | 0.590309  | -0.002503 |
| C | -1.061392 | 1.811071  | 0.010363  |
| C | -3.869828 | 1.812616  | 0.000604  |
| C | -1.770434 | 3.021033  | 0.013301  |
| C | -3.169333 | 3.024125  | 0.008405  |
| H | -4.962391 | 1.807377  | -0.003123 |
| H | -1.214515 | 3.961370  | 0.019596  |
| F | -2.830481 | -2.236426 | -0.006845 |
| C | 1.199095  | -0.334053 | -2.570879 |
| H | 0.967404  | -1.399726 | -2.726772 |
| H | 0.250692  | 0.219365  | -2.658208 |
| H | 1.855443  | -0.009420 | -3.389899 |
| C | 1.205092  | -0.362267 | 2.570920  |
| H | 0.256735  | 0.189605  | 2.667554  |
| H | 0.974834  | -1.429599 | 2.717279  |
| H | 1.864315  | -0.045339 | 3.390662  |
| C | 5.263346  | 1.184952  | -0.002069 |
| H | 5.955104  | 0.459491  | -0.460447 |
| H | 5.336331  | 2.113108  | -0.590759 |
| H | 5.617432  | 1.394793  | 1.016816  |
| H | 0.029708  | 1.811357  | 0.014282  |
| H | -3.713150 | 3.971261  | 0.010737  |
| H | -3.697840 | -0.372976 | -0.008226 |

### TS\_isom

|                                              |                             |
|----------------------------------------------|-----------------------------|
| Zero-point correction=                       | 0.254634 (Hartree/Particle) |
| Thermal correction to Energy=                | 0.273179                    |
| Thermal correction to Enthalpy=              | 0.274124                    |
| Thermal correction to Gibbs Free Energy=     | 0.204872                    |
| Sum of electronic and zero-point Energies=   | -692.372825                 |
| Sum of electronic and thermal Energies=      | -692.354279                 |
| Sum of electronic and thermal Enthalpies=    | -692.353335                 |
| Sum of electronic and thermal Free Energies= | -692.422586                 |
| E(RB-P86) =                                  | -692.627458560 A.U          |

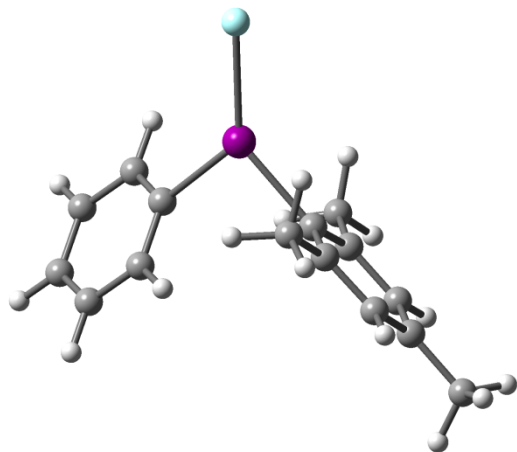

|   |           |           |           |
|---|-----------|-----------|-----------|
| C | -3.303736 | -0.161466 | -0.962947 |
| C | -2.047435 | 0.468458  | -0.987947 |
| C | -1.193416 | 0.225609  | 0.105152  |
| C | -1.556557 | -0.570852 | 1.209974  |
| C | -2.823398 | -1.174065 | 1.168493  |
| C | -3.706631 | -0.987811 | 0.094757  |
| H | -3.986201 | 0.009637  | -1.800722 |
| H | -3.126700 | -1.803575 | 2.010488  |
| I | 0.729943  | 1.234673  | 0.125249  |
| C | 1.861881  | -0.592658 | -0.190624 |
| C | 2.940093  | -0.838142 | 0.661994  |
| C | 1.545094  | -1.436365 | -1.256807 |
| C | 3.723648  | -1.978766 | 0.435638  |
| C | 2.331059  | -2.577665 | -1.459522 |
| C | 3.418495  | -2.846206 | -0.618624 |
| H | 4.569301  | -2.186599 | 1.094971  |
| H | 2.091088  | -3.252960 | -2.283917 |
| F | 1.495007  | 3.523696  | 0.381074  |
| C | -1.694258 | 1.367111  | -2.150884 |
| H | -1.558530 | 2.412097  | -1.829109 |
| H | -0.760721 | 1.056642  | -2.644473 |
| H | -2.496524 | 1.349259  | -2.900645 |
| C | -0.660071 | -0.798344 | 2.401368  |
| H | 0.276309  | -1.301581 | 2.112764  |
| H | -0.382784 | 0.150979  | 2.886632  |
| H | -1.165352 | -1.426965 | 3.146702  |
| C | -5.051648 | -1.672697 | 0.074804  |
| H | -5.763245 | -1.142152 | -0.573694 |
| H | -4.957508 | -2.702455 | -0.309524 |
| H | -5.481227 | -1.741207 | 1.085068  |
| H | 0.702072  | -1.226115 | -1.917022 |
| H | 4.029629  | -3.735519 | -0.786519 |
| H | 3.169635  | -0.167262 | 1.492207  |

### **syn-isom**

|                                              |                             |
|----------------------------------------------|-----------------------------|
| Zero-point correction=                       | 0.255501 (Hartree/Particle) |
| Thermal correction to Energy=                | 0.274405                    |
| Thermal correction to Enthalpy=              | 0.275350                    |
| Thermal correction to Gibbs Free Energy=     | 0.205996                    |
| Sum of electronic and zero-point Energies=   | -692.386496                 |
| Sum of electronic and thermal Energies=      | -692.367592                 |
| Sum of electronic and thermal Enthalpies=    | -692.366648                 |
| Sum of electronic and thermal Free Energies= | -692.436002                 |
| E(RB-P86) =                                  | -692.641997680 A.U          |

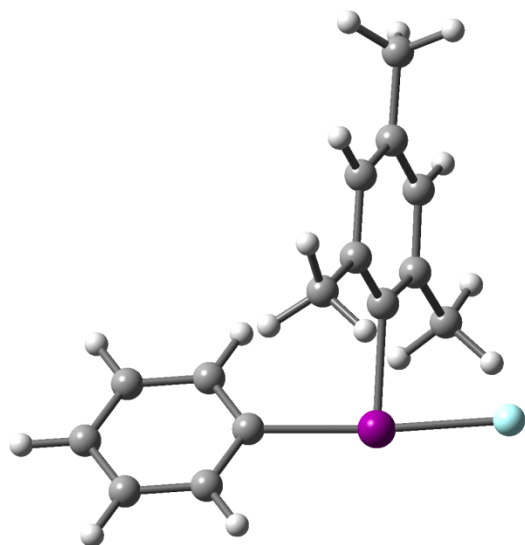

|   |           |           |           |
|---|-----------|-----------|-----------|
| C | 4.131284  | -1.356982 | 0.284560  |
| C | 3.217363  | -0.311039 | 0.473988  |
| C | 1.972864  | -0.358906 | -0.165149 |
| C | 1.631248  | -1.437610 | -0.987377 |
| C | 2.546807  | -2.483629 | -1.163620 |
| C | 3.795986  | -2.443447 | -0.531318 |
| H | 5.102202  | -1.322574 | 0.784626  |
| H | 3.482367  | 0.528222  | 1.123290  |
| H | 0.659658  | -1.476675 | -1.485621 |
| H | 2.281590  | -3.329769 | -1.802300 |
| H | 4.506905  | -3.260461 | -0.673728 |
| I | 0.663127  | 1.375001  | 0.099276  |
| C | -1.091377 | 0.160817  | 0.092475  |
| C | -1.935029 | 0.232313  | -1.030660 |
| C | -1.347439 | -0.651915 | 1.212287  |
| C | -3.082520 | -0.578231 | -1.007878 |
| C | -2.509828 | -1.439464 | 1.165294  |
| C | -3.387500 | -1.417323 | 0.072449  |
| H | -3.755373 | -0.545704 | -1.869881 |
| H | -2.730405 | -2.085706 | 2.020043  |
| F | -0.811120 | 3.071291  | 0.394154  |
| C | -0.454448 | -0.710535 | 2.426315  |
| H | 0.551134  | -1.082106 | 2.172625  |
| H | -0.329554 | 0.284653  | 2.881818  |
| H | -0.882356 | -1.380494 | 3.184003  |
| C | -1.672851 | 1.127974  | -2.215890 |
| H | -1.574745 | 2.176933  | -1.896219 |
| H | -0.741429 | 0.852229  | -2.736354 |
| H | -2.496416 | 1.057489  | -2.939126 |
| C | -4.644535 | -2.253964 | 0.073098  |
| H | -4.493387 | -3.205083 | 0.604063  |
| H | -5.465646 | -1.722035 | 0.582670  |
| H | -4.980356 | -2.473963 | -0.950371 |

### TS\_MesF

Zero-point correction= 0.254043 (Hartree/Particle)  
Thermal correction to Energy= 0.272603  
Thermal correction to Enthalpy= 0.273547  
Thermal correction to Gibbs Free Energy= 0.204886  
Sum of electronic and zero-point Energies= -692.355605  
Sum of electronic and thermal Energies= -692.337046  
Sum of electronic and thermal Enthalpies= -692.336101  
Sum of electronic and thermal Free Energies= -692.404763  
E(RB-P86) = -692.609648146 A.U

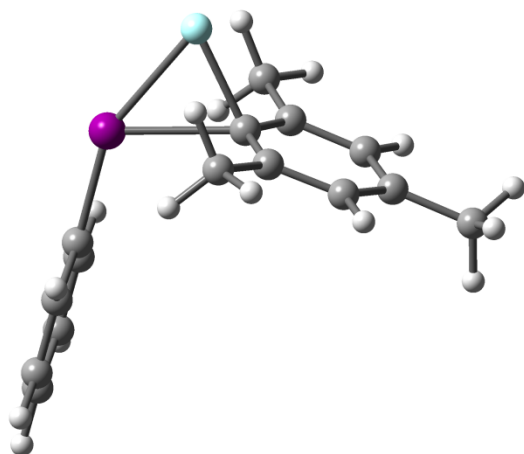

|   |           |           |           |
|---|-----------|-----------|-----------|
| C | -2.860834 | 1.063092  | 1.200372  |
| C | -1.895986 | 0.035314  | 1.242716  |
| C | -1.445688 | -0.405388 | 0.000833  |
| C | -1.897516 | 0.034037  | -1.241968 |
| C | -2.861877 | 1.061019  | -1.200427 |
| C | -3.350025 | 1.595085  | 0.000242  |
| H | -3.239226 | 1.439598  | 2.156261  |
| H | -3.241232 | 1.435985  | -2.156620 |
| I | 0.795464  | -1.360028 | 0.000298  |
| C | 2.182667  | 0.262266  | -0.000267 |
| C | 2.632718  | 0.783196  | -1.220814 |
| C | 2.632237  | 0.784641  | 1.219838  |
| C | 3.553375  | 1.838108  | -1.213824 |
| C | 3.552872  | 1.839568  | 1.211957  |
| C | 4.012789  | 2.366029  | -0.001155 |
| H | 3.910469  | 2.245876  | -2.162299 |
| H | 3.909555  | 2.248494  | 2.160089  |
| F | -1.478984 | -2.410768 | 0.000806  |
| C | -1.426327 | -0.528509 | 2.557954  |
| H | -0.365234 | -0.291439 | 2.739627  |
| H | -2.013457 | -0.110963 | 3.387287  |
| H | -1.522242 | -1.623742 | 2.569708  |
| C | -1.428258 | -0.532001 | -2.556402 |
| H | -0.367359 | -0.294790 | -2.738982 |

|   |           |           |           |
|---|-----------|-----------|-----------|
| H | -1.523625 | -1.627298 | -2.565891 |
| H | -2.016017 | -0.116276 | -3.386197 |
| C | -4.363922 | 2.717123  | -0.001474 |
| H | -4.936751 | 2.740544  | 0.937136  |
| H | -3.872244 | 3.698749  | -0.111220 |
| H | -5.074826 | 2.615384  | -0.835304 |
| H | 2.277721  | 0.374757  | 2.167521  |
| H | 4.729840  | 3.189884  | -0.001502 |
| H | 2.278545  | 0.372175  | -2.168133 |

**Ar = 3,5-Me<sub>2</sub>C<sub>6</sub>H<sub>4</sub>**

**TS\_ArF**

|                                              |                             |
|----------------------------------------------|-----------------------------|
| Zero-point correction=                       | 0.306782 (Hartree/Particle) |
| Thermal correction to Energy=                | 0.329087                    |
| Thermal correction to Enthalpy=              | 0.330031                    |
| Thermal correction to Gibbs Free Energy=     | 0.252344                    |
| Sum of electronic and zero-point Energies=   | -770.956033                 |
| Sum of electronic and thermal Energies=      | -770.933729                 |
| Sum of electronic and thermal Enthalpies=    | -770.932784                 |
| Sum of electronic and thermal Free Energies= | -771.010471                 |
| E(RB-P86) =                                  | -771.262815336 A.U.         |

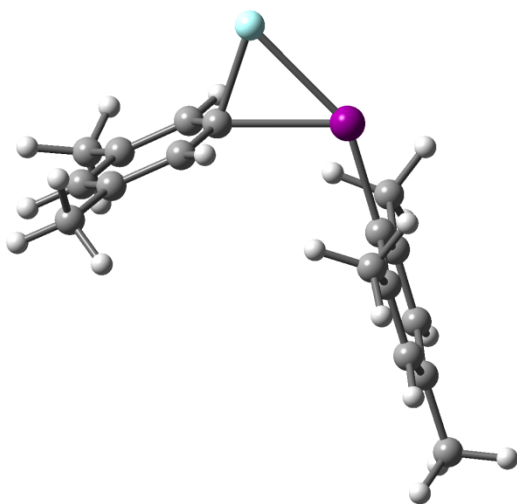

|   |           |           |           |
|---|-----------|-----------|-----------|
| C | 2.953537  | 1.438658  | -1.225171 |
| C | 2.235112  | 0.229228  | -1.231364 |
| C | 1.909814  | -0.344540 | -0.006089 |
| C | 2.251455  | 0.205551  | 1.221641  |
| C | 2.977247  | 1.414913  | 1.226380  |
| C | 3.314952  | 2.015205  | 0.004990  |
| I | -0.050228 | -1.693123 | -0.010811 |
| C | -1.685861 | -0.315892 | 0.002751  |
| C | -2.201872 | 0.115264  | 1.244592  |
| C | -2.213098 | 0.123272  | -1.230354 |
| C | -3.276865 | 1.016846  | 1.218421  |
| C | -3.288676 | 1.025288  | -1.187614 |
| C | -3.834241 | 1.483771  | 0.019070  |

|   |           |           |           |
|---|-----------|-----------|-----------|
| H | -3.688312 | 1.363309  | 2.171286  |
| H | -3.709047 | 1.378325  | -2.134038 |
| F | 2.443490  | -2.219429 | -0.030554 |
| C | -1.662661 | -0.351849 | 2.575746  |
| H | -1.722900 | -1.447371 | 2.674863  |
| H | -0.606184 | -0.072379 | 2.707723  |
| H | -2.236051 | 0.096227  | 3.398640  |
| C | -1.687516 | -0.333773 | -2.570421 |
| H | -0.632478 | -0.053213 | -2.711090 |
| H | -1.748800 | -1.428485 | -2.677336 |
| H | -2.269258 | 0.120545  | -3.383964 |
| C | -5.008150 | 2.432651  | 0.030511  |
| H | -5.952962 | 1.881335  | 0.173664  |
| H | -4.929214 | 3.158783  | 0.853222  |
| H | -5.088434 | 2.984562  | -0.916800 |
| H | 1.989801  | -0.285903 | 2.159549  |
| H | 3.876569  | 2.953855  | 0.009562  |
| H | 1.959641  | -0.245861 | -2.173509 |
| C | 3.381778  | 2.035214  | 2.545358  |
| H | 3.915332  | 2.983245  | 2.388291  |
| H | 2.503023  | 2.237105  | 3.178252  |
| H | 4.042752  | 1.362332  | 3.115073  |
| C | 3.302039  | 2.114835  | -2.532359 |
| H | 2.537918  | 2.863011  | -2.802901 |
| H | 4.265072  | 2.641846  | -2.461005 |
| H | 3.362239  | 1.391249  | -3.358036 |

**anti-isom**

|                                              |                             |
|----------------------------------------------|-----------------------------|
| Zero-point correction=                       | 0.308284 (Hartree/Particle) |
| Thermal correction to Energy=                | 0.330916                    |
| Thermal correction to Enthalpy=              | 0.331860                    |
| Thermal correction to Gibbs Free Energy=     | 0.253441                    |
| Sum of electronic and zero-point Energies=   | -770.986672                 |
| Sum of electronic and thermal Energies=      | -770.964040                 |
| Sum of electronic and thermal Enthalpies=    | -770.963096                 |
| Sum of electronic and thermal Free Energies= | -771.041515                 |
| E(RB-P86) =                                  | -771.294955607 A.U.         |

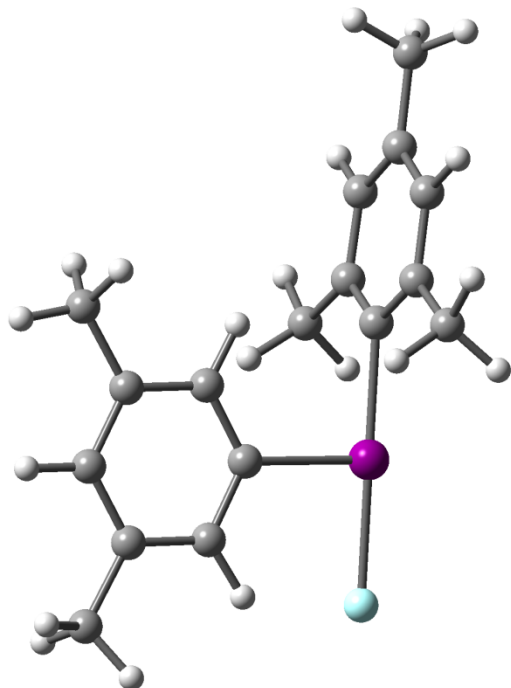

|   |           |           |           |
|---|-----------|-----------|-----------|
| C | -3.408889 | 0.593038  | 1.228006  |
| C | -2.172369 | -0.072088 | 1.246472  |
| C | -1.581079 | -0.397833 | 0.005899  |
| C | -2.202201 | -0.081967 | -1.222440 |
| C | -3.438214 | 0.583325  | -1.179274 |
| C | -4.056437 | 0.930097  | 0.030609  |
| H | -3.878312 | 0.852876  | 2.181936  |
| H | -3.930591 | 0.835737  | -2.123551 |
| I | 0.239598  | -1.584932 | -0.012142 |
| C | 1.549370  | 0.144984  | -0.008060 |
| C | 2.919808  | -0.096042 | 0.018402  |
| C | 0.993904  | 1.417972  | -0.036547 |
| C | 3.790966  | 1.007362  | 0.020808  |
| C | 1.862374  | 2.528506  | -0.039657 |
| C | 3.245307  | 2.302264  | -0.011511 |
| F | 2.170573  | -2.850446 | -0.028754 |
| C | -1.531062 | -0.401109 | 2.575444  |
| H | -1.434374 | -1.488444 | 2.723742  |
| H | -0.519513 | 0.027381  | 2.656544  |
| H | -2.134004 | -0.001105 | 3.402149  |
| C | -1.593439 | -0.421430 | -2.564173 |
| H | -0.579100 | -0.004708 | -2.668387 |
| H | -1.512254 | -1.510171 | -2.711734 |
| H | -2.209893 | -0.017063 | -3.378713 |
| C | -5.371221 | 1.672152  | 0.043855  |
| H | -5.961083 | 1.428426  | 0.939485  |
| H | -5.202930 | 2.762543  | 0.049653  |
| H | -5.973056 | 1.439124  | -0.846522 |
| H | -0.087320 | 1.569610  | -0.060132 |

|   |          |           |           |
|---|----------|-----------|-----------|
| H | 3.921625 | 3.162702  | -0.017500 |
| H | 3.283845 | -1.126340 | 0.032399  |
| C | 5.286326 | 0.797062  | 0.082179  |
| H | 5.643576 | 0.839662  | 1.124910  |
| H | 5.570833 | -0.183886 | -0.324089 |
| H | 5.822049 | 1.576988  | -0.478828 |
| C | 1.294487 | 3.928613  | -0.078588 |
| H | 0.694661 | 4.088549  | -0.988743 |
| H | 0.631575 | 4.112473  | 0.781749  |
| H | 2.094656 | 4.681599  | -0.060597 |

### TS\_isom

|                                              |                             |
|----------------------------------------------|-----------------------------|
| Zero-point correction=                       | 0.307185 (Hartree/Particle) |
| Thermal correction to Energy=                | 0.329697                    |
| Thermal correction to Enthalpy=              | 0.330641                    |
| Thermal correction to Gibbs Free Energy=     | 0.251671                    |
| Sum of electronic and zero-point Energies=   | -770.974211                 |
| Sum of electronic and thermal Energies=      | -770.951699                 |
| Sum of electronic and thermal Enthalpies=    | -770.950754                 |
| Sum of electronic and thermal Free Energies= | -771.029724                 |
| E(RB-P86) =                                  | -771.281395531 A.U.         |

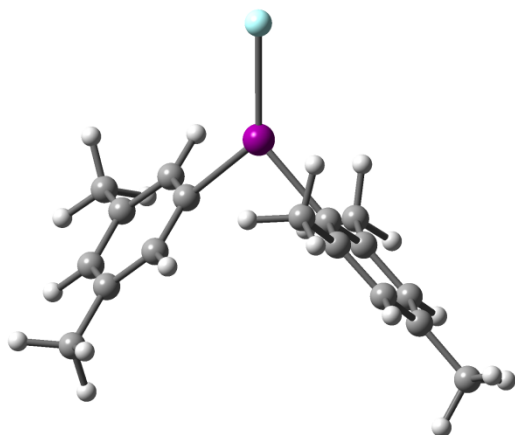

|   |           |           |           |
|---|-----------|-----------|-----------|
| C | -3.564936 | -0.892850 | -0.748733 |
| C | -2.497330 | 0.003490  | -0.920250 |
| C | -1.583338 | 0.117312  | 0.146330  |
| C | -1.721990 | -0.583331 | 1.360494  |
| C | -2.809858 | -1.466135 | 1.463935  |
| C | -3.734824 | -1.640393 | 0.425281  |
| H | -4.288108 | -0.999468 | -1.562863 |
| H | -2.935097 | -2.027807 | 2.394590  |
| I | 0.044828  | 1.540819  | -0.074168 |
| C | 1.606520  | 0.034367  | -0.158816 |
| C | 2.601323  | 0.098133  | 0.813068  |
| C | 1.624072  | -0.896219 | -1.200445 |
| C | 3.668980  | -0.821312 | 0.757064  |
| C | 2.674105  | -1.825855 | -1.258555 |
| C | 3.681287  | -1.766698 | -0.276592 |



|   |           |           |           |
|---|-----------|-----------|-----------|
| F | 0.174730  | 3.973353  | -0.181953 |
| C | -2.400968 | 0.799131  | -2.201925 |
| H | -2.507344 | 1.880103  | -2.016924 |
| H | -1.436081 | 0.651434  | -2.710282 |
| H | -3.198470 | 0.499140  | -2.894956 |
| C | -0.771988 | -0.435015 | 2.522502  |
| H | 0.233049  | -0.810812 | 2.272410  |
| H | -0.659546 | 0.618678  | 2.822836  |
| H | -1.137123 | -1.000622 | 3.390202  |
| C | -4.877784 | -2.617045 | 0.560226  |
| H | -5.773461 | -2.262109 | 0.029706  |
| H | -4.606972 | -3.594251 | 0.125750  |
| H | -5.138660 | -2.786522 | 1.614649  |
| H | 0.840229  | -0.913751 | -1.959878 |
| H | 4.506380  | -2.484205 | -0.324891 |
| H | 2.561987  | 0.841443  | 1.612839  |
| C | 2.723706  | -2.869061 | -2.349842 |
| H | 3.706189  | -2.875553 | -2.846702 |
| H | 2.564179  | -3.877560 | -1.934536 |
| H | 1.952270  | -2.691792 | -3.111958 |
| C | 4.757934  | -0.784268 | 1.803282  |
| H | 5.200841  | 0.220867  | 1.880992  |
| H | 4.357744  | -1.039130 | 2.797972  |
| H | 5.560094  | -1.497148 | 1.567371  |

**syn-isom**

|                                              |                             |
|----------------------------------------------|-----------------------------|
| Zero-point correction=                       | 0.307882 (Hartree/Particle) |
| Thermal correction to Energy=                | 0.330810                    |
| Thermal correction to Enthalpy=              | 0.331754                    |
| Thermal correction to Gibbs Free Energy=     | 0.251566                    |
| Sum of electronic and zero-point Energies=   | -770.987392                 |
| Sum of electronic and thermal Energies=      | -770.964464                 |
| Sum of electronic and thermal Enthalpies=    | -770.963520                 |
| Sum of electronic and thermal Free Energies= | -771.043708                 |
| E(RB-P86) =                                  | -771.295274049 A.U.         |

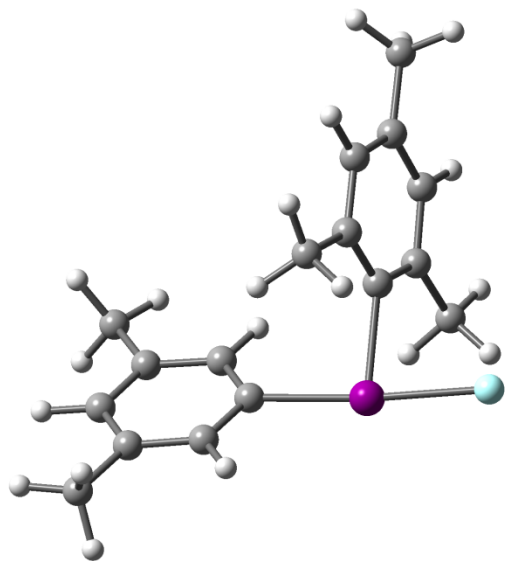

|   |           |           |           |
|---|-----------|-----------|-----------|
| C | -3.912373 | 0.406340  | 0.472570  |
| C | -2.814794 | -0.478347 | 0.494186  |
| C | -1.632348 | -0.134255 | -0.161421 |
| C | -1.506417 | 1.080310  | -0.844639 |
| C | -2.581311 | 1.982318  | -0.865625 |
| C | -3.772264 | 1.624280  | -0.205594 |
| H | -2.899937 | -1.427367 | 1.033018  |
| H | -0.576350 | 1.340166  | -1.357400 |
| H | -4.616506 | 2.321173  | -0.221621 |
| I | -0.037014 | -1.629044 | -0.168324 |
| C | 1.472682  | -0.149510 | 0.127349  |
| C | 2.324817  | 0.144622  | -0.952817 |
| C | 1.567648  | 0.467122  | 1.387985  |
| C | 3.306230  | 1.124899  | -0.731201 |
| C | 2.570241  | 1.440597  | 1.538399  |
| C | 3.445732  | 1.782522  | 0.499214  |
| H | 3.980487  | 1.377236  | -1.555014 |
| H | 2.663806  | 1.940682  | 2.506891  |
| F | 1.727067  | -3.063539 | -0.125969 |
| C | 0.666778  | 0.137208  | 2.551618  |
| H | -0.387839 | 0.358297  | 2.322358  |
| H | 0.726600  | -0.930708 | 2.815506  |
| H | 0.953025  | 0.722872  | 3.435440  |
| C | 2.236753  | -0.538777 | -2.294850 |
| H | 2.333237  | -1.629806 | -2.182620 |
| H | 1.271406  | -0.342110 | -2.788941 |
| H | 3.034879  | -0.182105 | -2.959715 |
| C | 4.530585  | 2.812147  | 0.707623  |
| H | 4.254397  | 3.532420  | 1.491027  |
| H | 5.471448  | 2.328917  | 1.020943  |
| H | 4.741240  | 3.365749  | -0.219013 |
| C | -5.201087 | 0.041252  | 1.172412  |
| H | -5.668696 | -0.841535 | 0.706684  |

|   |           |           |           |
|---|-----------|-----------|-----------|
| H | -5.022683 | -0.209561 | 2.230027  |
| H | -5.924275 | 0.868029  | 1.133614  |
| C | -2.466338 | 3.311472  | -1.575723 |
| H | -2.491973 | 4.145962  | -0.855750 |
| H | -1.527605 | 3.384288  | -2.142696 |
| H | -3.303731 | 3.463385  | -2.274739 |

### TS\_MesF

|                                              |                             |
|----------------------------------------------|-----------------------------|
| Zero-point correction=                       | 0.306393 (Hartree/Particle) |
| Thermal correction to Energy=                | 0.328129                    |
| Thermal correction to Enthalpy=              | 0.329073                    |
| Thermal correction to Gibbs Free Energy=     | 0.252470                    |
| Sum of electronic and zero-point Energies=   | -770.956713                 |
| Sum of electronic and thermal Energies=      | -770.934977                 |
| Sum of electronic and thermal Enthalpies=    | -770.934033                 |
| Sum of electronic and thermal Free Energies= | -771.010636                 |
| E(RB-P86) =                                  | -771.263105803 A.U.         |

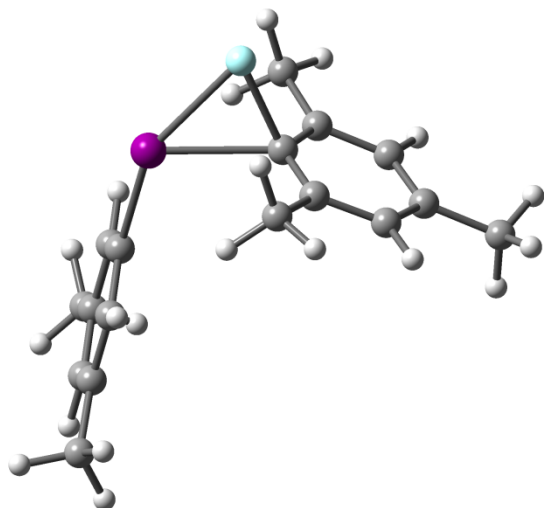

|   |           |           |           |
|---|-----------|-----------|-----------|
| C | 2.891114  | 1.507667  | -1.194382 |
| C | 2.206547  | 0.276085  | -1.235071 |
| C | 1.857957  | -0.256103 | 0.006330  |
| C | 2.182347  | 0.291214  | 1.247699  |
| C | 2.867603  | 1.522397  | 1.204948  |
| C | 3.221399  | 2.153037  | 0.004725  |
| H | 3.177047  | 1.958278  | -2.150427 |
| H | 3.134571  | 1.984992  | 2.160763  |
| I | -0.099154 | -1.680075 | -0.004010 |
| C | -1.764041 | -0.348442 | -0.006683 |
| C | -2.307050 | 0.063889  | 1.214573  |
| C | -2.278726 | 0.100067  | -1.228250 |
| C | -3.397229 | 0.951092  | 1.223757  |
| C | -3.372371 | 0.981798  | -1.236279 |
| C | -3.910081 | 1.394775  | -0.005747 |
| F | 2.373614  | -2.188923 | 0.017788  |
| C | 1.914592  | -0.395939 | -2.551468 |

|   |           |           |           |
|---|-----------|-----------|-----------|
| H | 0.830624  | -0.466911 | -2.738142 |
| H | 2.364333  | 0.169342  | -3.379232 |
| H | 2.314173  | -1.420490 | -2.564148 |
| C | 1.864702  | -0.363530 | 2.566760  |
| H | 0.777252  | -0.450347 | 2.723610  |
| H | 2.281223  | -1.380657 | 2.609673  |
| H | 2.281134  | 0.223401  | 3.396857  |
| C | 3.927615  | 3.490354  | 0.003765  |
| H | 4.563651  | 3.607120  | -0.886217 |
| H | 3.204387  | 4.323777  | 0.000677  |
| H | 4.559543  | 3.610616  | 0.896270  |
| H | -1.843858 | -0.233636 | -2.173046 |
| H | -4.759230 | 2.085742  | -0.005748 |
| H | -1.895278 | -0.299101 | 2.158961  |
| C | -3.983136 | 1.435724  | 2.529555  |
| H | -3.561046 | 2.416289  | 2.806586  |
| H | -5.073749 | 1.558911  | 2.456546  |
| H | -3.765330 | 0.738058  | 3.350727  |
| C | -3.969982 | 1.458532  | -2.539617 |
| H | -4.904455 | 0.917294  | -2.763022 |
| H | -4.218228 | 2.529605  | -2.494973 |
| H | -3.281686 | 1.296288  | -3.380984 |

**Ar = 2,6-Me<sub>2</sub>C<sub>6</sub>H<sub>4</sub>**

**TS\_ArF**

|                                              |                             |
|----------------------------------------------|-----------------------------|
| Zero-point correction=                       | 0.307216 (Hartree/Particle) |
| Thermal correction to Energy=                | 0.329187                    |
| Thermal correction to Enthalpy=              | 0.330131                    |
| Thermal correction to Gibbs Free Energy=     | 0.254565                    |
| Sum of electronic and zero-point Energies=   | -770.952229                 |
| Sum of electronic and thermal Energies=      | -770.930258                 |
| Sum of electronic and thermal Enthalpies=    | -770.929314                 |
| Sum of electronic and thermal Free Energies= | -771.004880                 |
| E(RB-P86) =                                  | -771.259444751 A.U.         |

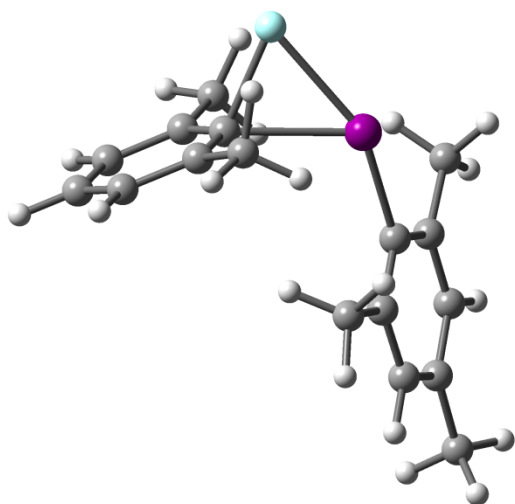

|   |           |           |           |
|---|-----------|-----------|-----------|
| C | -2.652146 | 1.245947  | 2.295910  |
| C | -2.044479 | 0.127456  | 1.686888  |
| C | -2.080893 | 0.114756  | 0.292840  |
| C | -2.699817 | 1.061535  | -0.526948 |
| C | -3.278172 | 2.154853  | 0.149364  |
| C | -3.252989 | 2.255284  | 1.542503  |
| H | -2.641212 | 1.300954  | 3.388238  |
| H | -3.770298 | 2.924397  | -0.452337 |
| I | -0.294528 | -1.162821 | -0.724114 |
| C | 1.572336  | -0.187641 | -0.297373 |
| C | 1.822747  | 1.108088  | -0.795946 |
| C | 2.516952  | -0.893732 | 0.478753  |
| C | 3.056021  | 1.698015  | -0.477995 |
| C | 3.734598  | -0.250133 | 0.757026  |
| C | 4.021026  | 1.043125  | 0.300769  |
| H | 3.265528  | 2.702421  | -0.858453 |
| H | 4.481058  | -0.786659 | 1.350591  |
| F | -2.755852 | -1.662309 | -0.381192 |
| C | -1.414320 | -0.954262 | 2.524380  |
| H | -0.313753 | -0.915391 | 2.463537  |
| H | -1.693470 | -0.833518 | 3.580111  |
| H | -1.731010 | -1.951085 | 2.186522  |
| C | -2.820186 | 0.932698  | -2.022252 |
| H | -1.839810 | 0.780176  | -2.499447 |
| H | -3.442068 | 0.063210  | -2.282253 |
| H | -3.276033 | 1.835539  | -2.451062 |
| C | 2.295853  | -2.298240 | 0.988881  |
| H | 1.381755  | -2.377069 | 1.598247  |
| H | 2.191904  | -3.017672 | 0.160704  |
| H | 3.145372  | -2.617646 | 1.607736  |
| C | 0.840292  | 1.864046  | -1.655727 |
| H | 0.605815  | 1.306123  | -2.576754 |
| H | -0.109506 | 2.043479  | -1.128188 |
| H | 1.252858  | 2.839671  | -1.946576 |
| C | 5.322632  | 1.722019  | 0.653518  |
| H | 6.111825  | 0.988911  | 0.873919  |
| H | 5.668828  | 2.374537  | -0.161571 |
| H | 5.201626  | 2.355398  | 1.548752  |
| H | -3.713465 | 3.111641  | 2.039540  |

**anti-isom**

|                                              |                             |
|----------------------------------------------|-----------------------------|
| Zero-point correction=                       | 0.309303 (Hartree/Particle) |
| Thermal correction to Energy=                | 0.331195                    |
| Thermal correction to Enthalpy=              | 0.332139                    |
| Thermal correction to Gibbs Free Energy=     | 0.258202                    |
| Sum of electronic and zero-point Energies=   | -770.979343                 |
| Sum of electronic and thermal Energies=      | -770.957451                 |
| Sum of electronic and thermal Enthalpies=    | -770.956507                 |
| Sum of electronic and thermal Free Energies= | -771.030444                 |
| E(RB-P86) =                                  | -771.288646131 A.U          |

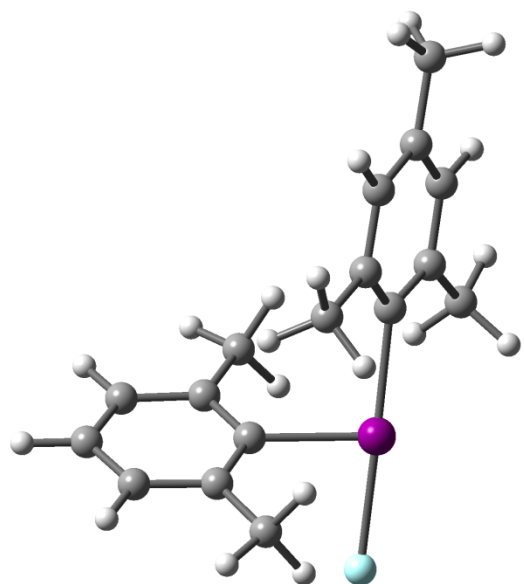

|   |           |           |           |
|---|-----------|-----------|-----------|
| C | -3.685522 | -0.158716 | 0.604927  |
| C | -2.426567 | -0.779886 | 0.607028  |
| C | -1.425269 | -0.249047 | -0.238861 |
| C | -1.683082 | 0.840233  | -1.095567 |
| C | -2.961021 | 1.425930  | -1.049145 |
| C | -3.971846 | 0.949440  | -0.205568 |
| H | -4.465512 | -0.559327 | 1.260257  |
| H | -3.166567 | 2.279541  | -1.702710 |
| I | 0.507300  | -1.294943 | -0.259664 |
| C | 1.691213  | 0.414499  | 0.289027  |
| C | 2.663099  | 0.846794  | -0.635362 |
| C | 1.478993  | 1.008188  | 1.547344  |
| C | 3.432327  | 1.963097  | -0.260166 |
| C | 2.279583  | 2.123606  | 1.858430  |
| C | 3.239963  | 2.600024  | 0.966510  |
| H | 4.195740  | 2.325500  | -0.953238 |
| H | 2.140867  | 2.609334  | 2.827563  |
| F | 2.534138  | -2.388713 | -0.177315 |
| C | 0.479738  | 0.514400  | 2.561377  |
| H | -0.555287 | 0.641276  | 2.207360  |
| H | 0.627444  | -0.554653 | 2.781462  |
| H | 0.586094  | 1.071210  | 3.501841  |
| C | 2.927481  | 0.170797  | -1.956065 |
| H | 3.159954  | -0.893824 | -1.797389 |
| H | 2.051357  | 0.223768  | -2.622148 |
| H | 3.770217  | 0.652959  | -2.469411 |
| C | -0.664856 | 1.390701  | -2.064172 |
| H | 0.199215  | 1.833263  | -1.544532 |
| H | -0.279795 | 0.599394  | -2.727539 |
| H | -1.114316 | 2.169685  | -2.694882 |
| C | -2.216008 | -1.991283 | 1.489009  |
| H | -2.039210 | -2.902906 | 0.895008  |

|   |           |           |           |
|---|-----------|-----------|-----------|
| H | -1.352515 | -1.871227 | 2.160841  |
| H | -3.104912 | -2.169662 | 2.109569  |
| C | -5.339402 | 1.590136  | -0.182475 |
| H | -6.096787 | 0.919199  | -0.620480 |
| H | -5.660354 | 1.807226  | 0.848288  |
| H | -5.352467 | 2.529837  | -0.752533 |
| H | 3.849763  | 3.466310  | 1.233047  |

### TS\_isom

|                                              |                             |
|----------------------------------------------|-----------------------------|
| Zero-point correction=                       | 0.308300 (Hartree/Particle) |
| Thermal correction to Energy=                | 0.329969                    |
| Thermal correction to Enthalpy=              | 0.330913                    |
| Thermal correction to Gibbs Free Energy=     | 0.256446                    |
| Sum of electronic and zero-point Energies=   | -770.968430                 |
| Sum of electronic and thermal Energies=      | -770.946761                 |
| Sum of electronic and thermal Enthalpies=    | -770.945817                 |
| Sum of electronic and thermal Free Energies= | -771.020283                 |
| E(RB-P86) =                                  | -771.276729416 A.U.         |

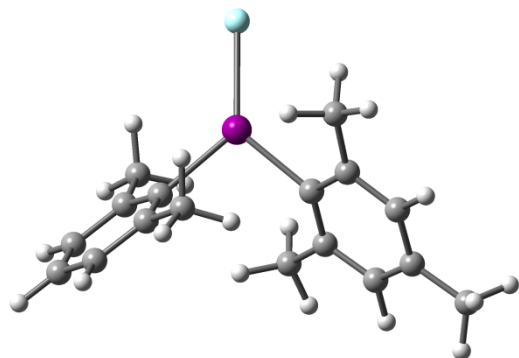

|   |           |           |           |
|---|-----------|-----------|-----------|
| C | 3.642266  | -0.140331 | 0.659786  |
| C | 2.402664  | 0.512441  | 0.760478  |
| C | 1.409865  | 0.144071  | -0.169802 |
| C | 1.624858  | -0.797041 | -1.194576 |
| C | 2.884559  | -1.418977 | -1.231905 |
| C | 3.902385  | -1.108377 | -0.320182 |
| H | 4.425933  | 0.124118  | 1.376106  |
| H | 3.069543  | -2.165862 | -2.009713 |
| I | -0.473554 | 1.237711  | -0.067002 |
| C | -1.814511 | -0.461795 | 0.246582  |
| C | -2.846171 | -0.622593 | -0.700367 |
| C | -1.676623 | -1.260034 | 1.398295  |
| C | -3.750333 | -1.677075 | -0.477481 |
| C | -2.606306 | -2.303581 | 1.560072  |
| C | -3.628532 | -2.513037 | 0.633227  |
| H | -4.560552 | -1.833133 | -1.194060 |
| H | -2.519758 | -2.948817 | 2.438096  |
| F | -0.968246 | 3.630798  | -0.239557 |
| C | 2.206919  | 1.562943  | 1.828836  |
| H | 1.989578  | 2.551427  | 1.393587  |

|   |           |           |           |
|---|-----------|-----------|-----------|
| H | 1.373182  | 1.313361  | 2.503629  |
| H | 3.116234  | 1.659408  | 2.437026  |
| C | 0.591728  | -1.153424 | -2.232908 |
| H | -0.311548 | -1.588426 | -1.777835 |
| H | 0.279265  | -0.264179 | -2.804202 |
| H | 0.997844  | -1.884433 | -2.944784 |
| C | 5.255895  | -1.770622 | -0.411739 |
| H | 5.949399  | -1.156353 | -1.010602 |
| H | 5.708326  | -1.896600 | 0.582721  |
| H | 5.189296  | -2.756394 | -0.893726 |
| H | -4.340808 | -3.327658 | 0.782719  |
| C | -0.612340 | -1.042956 | 2.442920  |
| H | 0.398689  | -1.125094 | 2.015464  |
| H | -0.700068 | -0.041899 | 2.895729  |
| H | -0.705158 | -1.786099 | 3.245912  |
| C | -3.033588 | 0.271679  | -1.902458 |
| H | -3.254493 | 1.309901  | -1.607051 |
| H | -2.136216 | 0.298237  | -2.539668 |
| H | -3.872540 | -0.085133 | -2.514896 |

**syn-isom**

|                                              |                             |
|----------------------------------------------|-----------------------------|
| Zero-point correction=                       | 0.308919 (Hartree/Particle) |
| Thermal correction to Energy=                | 0.331040                    |
| Thermal correction to Enthalpy=              | 0.331984                    |
| Thermal correction to Gibbs Free Energy=     | 0.257067                    |
| Sum of electronic and zero-point Energies=   | -770.979801                 |
| Sum of electronic and thermal Energies=      | -770.957681                 |
| Sum of electronic and thermal Enthalpies=    | -770.956736                 |
| Sum of electronic and thermal Free Energies= | -771.031653                 |
| E(RB-P86) =                                  | -771.288720468 A.U.         |

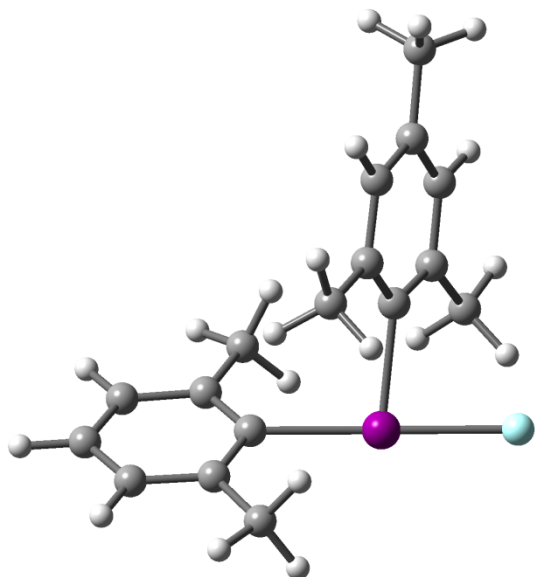

|   |          |          |           |
|---|----------|----------|-----------|
| C | 3.903786 | 1.356776 | -0.538504 |
| C | 2.948453 | 0.332344 | -0.666690 |



|   |           |           |           |
|---|-----------|-----------|-----------|
| C | 1.866882  | 0.321342  | 0.243505  |
| C | 1.749983  | 1.271825  | 1.280338  |
| C | 2.729092  | 2.278805  | 1.360455  |
| C | 3.792610  | 2.327245  | 0.458285  |
| H | 4.745738  | 1.381601  | -1.235634 |
| H | 2.651373  | 3.027011  | 2.153912  |
| H | 4.543461  | 3.116898  | 0.539133  |
| I | 0.451225  | -1.359263 | 0.062478  |
| C | -1.305950 | -0.148133 | -0.162806 |
| C | -2.309129 | -0.262842 | 0.819606  |
| C | -1.414905 | 0.678841  | -1.295058 |
| C | -3.450638 | 0.537444  | 0.647324  |
| C | -2.583399 | 1.454332  | -1.399383 |
| C | -3.603149 | 1.408076  | -0.440840 |
| H | -4.246576 | 0.467164  | 1.394582  |
| H | -2.693533 | 2.105976  | -2.271180 |
| F | -1.019711 | -3.107112 | -0.218949 |
| C | -0.378889 | 0.755384  | -2.387476 |
| H | 0.582220  | 1.137600  | -2.010202 |
| H | -0.190141 | -0.236579 | -2.828517 |
| H | -0.718975 | 1.423504  | -3.189734 |
| C | -2.228845 | -1.203040 | 1.994707  |
| H | -2.056157 | -2.232545 | 1.644441  |
| H | -1.400962 | -0.938479 | 2.672037  |
| H | -3.160786 | -1.170057 | 2.574965  |
| C | -4.829344 | 2.279688  | -0.569344 |
| H | -4.707098 | 3.210977  | 0.009186  |
| H | -5.012178 | 2.563805  | -1.615559 |
| H | -5.725079 | 1.771832  | -0.182654 |
| C | 0.643288  | 1.249221  | 2.305327  |
| H | -0.333166 | 1.497766  | 1.860404  |
| H | 0.549575  | 0.254560  | 2.769035  |
| H | 0.842422  | 1.975991  | 3.104850  |
| C | 3.138355  | -0.705949 | -1.751408 |
| H | 3.290815  | -1.714209 | -1.333303 |
| H | 2.270458  | -0.762363 | -2.426878 |
| H | 4.021865  | -0.463677 | -2.357916 |

### TS\_MesF

|                                              |                             |
|----------------------------------------------|-----------------------------|
| Zero-point correction=                       | 0.307500 (Hartree/Particle) |
| Thermal correction to Energy=                | 0.329314                    |
| Thermal correction to Enthalpy=              | 0.330258                    |
| Thermal correction to Gibbs Free Energy=     | 0.255482                    |
| Sum of electronic and zero-point Energies=   | -770.950508                 |
| Sum of electronic and thermal Energies=      | -770.928695                 |
| Sum of electronic and thermal Enthalpies=    | -770.927751                 |
| Sum of electronic and thermal Free Energies= | -771.002527                 |
| E(RB-P86) =                                  | -771.258008763 A.U.         |

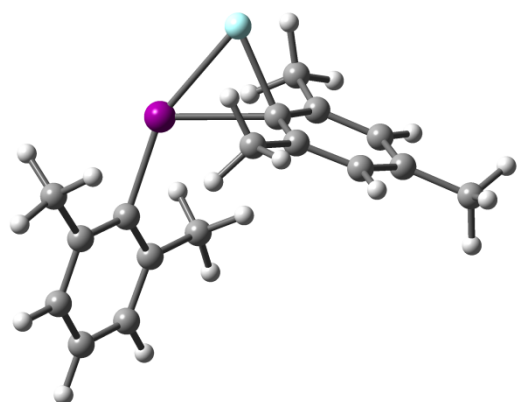

|   |           |           |           |
|---|-----------|-----------|-----------|
| C | -2.834641 | 0.753696  | 1.697836  |
| C | -1.813801 | -0.180906 | 1.422510  |
| C | -1.622916 | -0.470508 | 0.074680  |
| C | -2.378122 | 0.024140  | -0.988535 |
| C | -3.371979 | 0.957386  | -0.632526 |
| C | -3.613171 | 1.342553  | 0.694299  |
| H | -3.011127 | 1.013673  | 2.746589  |
| H | -3.984631 | 1.372863  | -1.439282 |
| I | 0.616369  | -1.250812 | -0.458977 |
| C | 2.020645  | 0.349716  | -0.137569 |
| C | 1.915121  | 1.538028  | -0.890515 |
| C | 3.029019  | 0.142631  | 0.830053  |
| C | 2.860273  | 2.548134  | -0.641349 |
| C | 3.950949  | 1.185283  | 1.031700  |
| C | 3.867434  | 2.377098  | 0.310283  |
| H | 2.797636  | 3.478604  | -1.211546 |
| H | 4.744845  | 1.047951  | 1.770490  |
| F | -1.578143 | -2.478529 | -0.216384 |
| C | -1.012332 | -0.794498 | 2.540299  |
| H | 0.016760  | -0.398031 | 2.553553  |
| H | -1.470685 | -0.566866 | 3.512490  |
| H | -0.944999 | -1.885794 | 2.426690  |
| C | -2.220417 | -0.421433 | -2.418259 |
| H | -1.179726 | -0.321374 | -2.763140 |
| H | -2.491963 | -1.482559 | -2.521761 |
| H | -2.862752 | 0.174817  | -3.080599 |
| C | -4.675106 | 2.366540  | 1.026899  |
| H | -5.560944 | 2.249904  | 0.384403  |
| H | -4.997511 | 2.282055  | 2.074907  |
| H | -4.299158 | 3.393200  | 0.879130  |
| H | 4.591989  | 3.175096  | 0.488545  |
| C | 3.174457  | -1.132543 | 1.626100  |
| H | 2.266507  | -1.361587 | 2.206443  |
| H | 3.367240  | -1.999422 | 0.973941  |
| H | 4.013580  | -1.048620 | 2.330157  |
| C | 0.857377  | 1.754854  | -1.943837 |
| H | 0.948325  | 1.014795  | -2.755616 |

|   |           |          |           |
|---|-----------|----------|-----------|
| H | -0.157854 | 1.664675 | -1.527545 |
| H | 0.953437  | 2.755406 | -2.387010 |

**Ar = *p*-NO<sub>2</sub>C<sub>6</sub>H<sub>4</sub>**

**TS\_ArF**

|                                              |                             |
|----------------------------------------------|-----------------------------|
| Zero-point correction=                       | 0.256090 (Hartree/Particle) |
| Thermal correction to Energy=                | 0.277179                    |
| Thermal correction to Enthalpy=              | 0.278123                    |
| Thermal correction to Gibbs Free Energy=     | 0.202708                    |
| Sum of electronic and zero-point Energies=   | -896.959856                 |
| Sum of electronic and thermal Energies=      | -896.938766                 |
| Sum of electronic and thermal Enthalpies=    | -896.937822                 |
| Sum of electronic and thermal Free Energies= | -897.013238                 |
| E(RB-P86) =                                  | -897.215945588 A.U          |

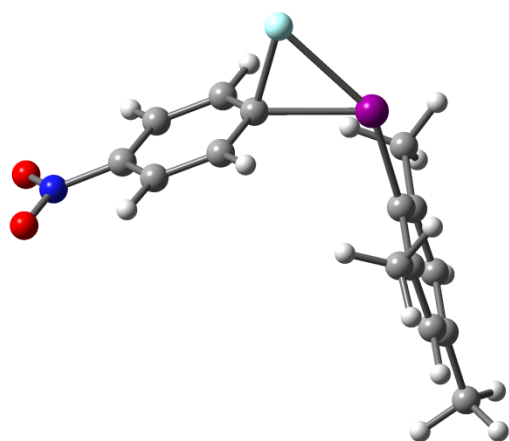

|   |           |           |           |
|---|-----------|-----------|-----------|
| C | -2.915651 | 0.410972  | 1.221998  |
| C | -1.893105 | -0.528686 | 1.228930  |
| C | -1.399095 | -1.006801 | -0.000203 |
| C | -1.892600 | -0.528201 | -1.229346 |
| C | -2.915148 | 0.411461  | -1.222458 |
| C | -3.421708 | 0.882202  | -0.000241 |
| H | -3.323284 | 0.789463  | 2.159376  |
| H | -3.322388 | 0.790334  | -2.159853 |
| I | 0.723472  | -1.783096 | 0.000083  |
| C | 1.940175  | -0.025532 | 0.000399  |
| C | 2.345956  | 0.512554  | -1.240221 |
| C | 2.344753  | 0.512702  | 1.240867  |
| C | 3.183748  | 1.637387  | -1.203366 |
| C | 3.182775  | 1.637967  | 1.204360  |
| C | 3.609001  | 2.216786  | 0.000784  |
| H | 3.515175  | 2.069006  | -2.152223 |
| H | 3.513284  | 2.069855  | 2.153385  |
| F | -1.564719 | -2.886614 | -0.000545 |
| C | 1.936489  | -0.058151 | -2.576773 |
| H | 2.244589  | -1.109803 | -2.684483 |
| H | 0.845398  | -0.020081 | -2.717059 |
| H | 2.398433  | 0.514731  | -3.391850 |

|   |           |           |           |
|---|-----------|-----------|-----------|
| C | 1.934448  | -0.057330 | 2.577445  |
| H | 0.843332  | -0.018535 | 2.717305  |
| H | 2.241874  | -1.109128 | 2.685604  |
| H | 2.396410  | 0.515525  | 3.392529  |
| C | 4.484724  | 3.445186  | -0.000400 |
| H | 5.160732  | 3.455184  | -0.867701 |
| H | 3.868626  | 4.358692  | -0.055616 |
| H | 5.087229  | 3.510302  | 0.916791  |
| H | -1.499313 | -0.903710 | -2.173629 |
| H | -1.500213 | -0.904585 | 2.173220  |
| N | -4.475001 | 1.876340  | -0.000254 |
| O | -4.909919 | 2.285197  | 1.098578  |
| O | -4.909456 | 2.285664  | -1.099096 |

**anti-isom**

|                                              |                             |
|----------------------------------------------|-----------------------------|
| Zero-point correction=                       | 0.257218 (Hartree/Particle) |
| Thermal correction to Energy=                | 0.278681                    |
| Thermal correction to Enthalpy=              | 0.279625                    |
| Thermal correction to Gibbs Free Energy=     | 0.203850                    |
| Sum of electronic and zero-point Energies=   | -896.982589                 |
| Sum of electronic and thermal Energies=      | -896.961126                 |
| Sum of electronic and thermal Enthalpies=    | -896.960182                 |
| Sum of electronic and thermal Free Energies= | -897.035957                 |
| E(RB-P86) =                                  | -897.239807025 A.U          |

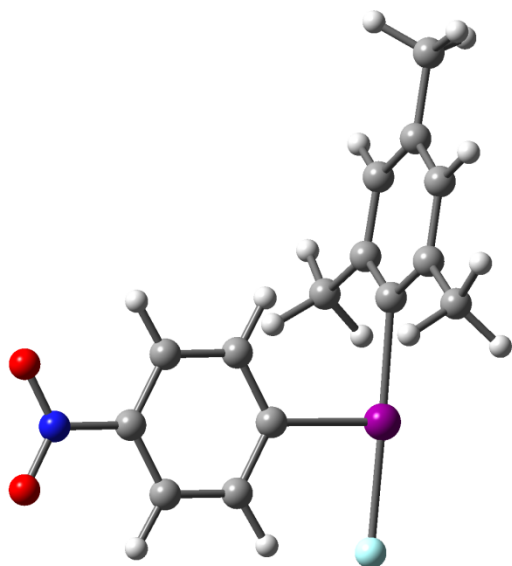

|   |          |           |           |
|---|----------|-----------|-----------|
| C | 3.345618 | 1.481942  | -1.203464 |
| C | 2.379319 | 0.466230  | -1.235593 |
| C | 1.907010 | -0.030913 | 0.001193  |
| C | 2.381567 | 0.460416  | 1.236333  |
| C | 3.349940 | 1.478321  | 1.204793  |
| C | 3.845293 | 1.999155  | 0.002208  |
| H | 3.717607 | 1.880372  | -2.152465 |
| H | 3.724883 | 1.873324  | 2.153789  |

|   |           |           |           |
|---|-----------|-----------|-----------|
| I | 0.558126  | -1.734486 | -0.000290 |
| C | -1.213383 | -0.510855 | 0.000595  |
| C | -2.450388 | -1.157853 | -0.005778 |
| C | -1.087668 | 0.879329  | 0.007422  |
| C | -3.608349 | -0.378240 | -0.005557 |
| C | -2.248427 | 1.654881  | 0.007652  |
| C | -3.490534 | 1.014595  | 0.001066  |
| H | -4.593941 | -0.843114 | -0.010536 |
| H | -2.192466 | 2.742989  | 0.012930  |
| F | -0.899368 | -3.500636 | -0.002615 |
| C | 1.880861  | -0.038407 | -2.570749 |
| H | 2.116873  | -1.104003 | -2.719342 |
| H | 0.788389  | 0.068165  | -2.666121 |
| H | 2.345637  | 0.525730  | -3.390759 |
| C | 1.888346  | -0.047041 | 2.572368  |
| H | 0.796091  | 0.058043  | 2.671669  |
| H | 2.126319  | -1.112522 | 2.718566  |
| H | 2.355166  | 0.516311  | 3.391754  |
| C | 4.889292  | 3.089453  | -0.004980 |
| H | 5.809283  | 2.751070  | -0.508448 |
| H | 4.531850  | 3.975772  | -0.553171 |
| H | 5.153115  | 3.400551  | 1.015291  |
| H | -0.109690 | 1.362853  | 0.012693  |
| H | -2.482869 | -2.249705 | -0.010278 |
| N | -4.714532 | 1.835767  | 0.001202  |
| O | -5.809759 | 1.249875  | -0.003489 |
| O | -4.587973 | 3.071525  | 0.005973  |

### TS\_isom

|                                              |                             |
|----------------------------------------------|-----------------------------|
| Zero-point correction=                       | 0.256658 (Hartree/Particle) |
| Thermal correction to Energy=                | 0.277701                    |
| Thermal correction to Enthalpy=              | 0.278646                    |
| Thermal correction to Gibbs Free Energy=     | 0.203136                    |
| Sum of electronic and zero-point Energies=   | -896.968124                 |
| Sum of electronic and thermal Energies=      | -896.947080                 |
| Sum of electronic and thermal Enthalpies=    | -896.946136                 |
| Sum of electronic and thermal Free Energies= | -897.021646                 |
| E(RB-P86) =                                  | -897.224781882 A.U.         |

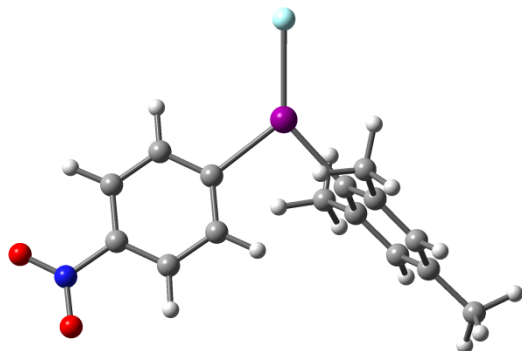

|   |           |           |           |
|---|-----------|-----------|-----------|
| C | -3.411204 | -1.555776 | -1.094121 |
| C | -2.543840 | -0.452473 | -1.149280 |
| C | -1.875279 | -0.110981 | 0.044035  |
| C | -2.061059 | -0.796645 | 1.262556  |
| C | -2.938339 | -1.891891 | 1.244950  |
| C | -3.623249 | -2.283836 | 0.085204  |
| H | -3.934864 | -1.850720 | -2.008143 |
| H | -3.088989 | -2.451662 | 2.172647  |
| I | -0.606852 | 1.642064  | 0.030812  |
| C | 1.247821  | 0.505353  | -0.022982 |
| C | 2.404398  | 1.210233  | 0.328286  |
| C | 1.281609  | -0.833166 | -0.419352 |
| C | 3.634702  | 0.553590  | 0.282070  |
| C | 2.512558  | -1.491279 | -0.459176 |
| C | 3.668308  | -0.787813 | -0.109257 |
| H | 4.556330  | 1.068867  | 0.551009  |
| H | 2.579064  | -2.536456 | -0.760404 |
| F | -0.877949 | 4.020709  | 0.050850  |
| C | -2.373226 | 0.293763  | -2.451726 |
| H | -2.716695 | 1.337109  | -2.369982 |
| H | -1.321172 | 0.320986  | -2.774991 |
| H | -2.958060 | -0.189814 | -3.245444 |
| C | -1.361617 | -0.421003 | 2.546078  |
| H | -0.265677 | -0.463136 | 2.441610  |
| H | -1.620149 | 0.601314  | 2.864465  |
| H | -1.648678 | -1.108820 | 3.352461  |
| C | -4.586598 | -3.444952 | 0.113856  |
| H | -5.595361 | -3.103268 | 0.401353  |
| H | -4.670514 | -3.921474 | -0.873314 |
| H | -4.277692 | -4.204321 | 0.846541  |
| H | 0.370211  | -1.368553 | -0.689425 |
| H | 2.363668  | 2.255509  | 0.640602  |
| N | 4.966988  | -1.485031 | -0.154564 |
| O | 5.983665  | -0.843197 | 0.155858  |
| O | 4.975641  | -2.677408 | -0.501429 |

### syn-isom

|                                              |                             |
|----------------------------------------------|-----------------------------|
| Zero-point correction=                       | 0.257499 (Hartree/Particle) |
| Thermal correction to Energy=                | 0.278923                    |
| Thermal correction to Enthalpy=              | 0.279867                    |
| Thermal correction to Gibbs Free Energy=     | 0.204202                    |
| Sum of electronic and zero-point Energies=   | -896.984324                 |
| Sum of electronic and thermal Energies=      | -896.962901                 |
| Sum of electronic and thermal Enthalpies=    | -896.961957                 |
| Sum of electronic and thermal Free Energies= | -897.037621                 |
| E(RB-P86) =                                  | -897.241823379 A.U          |

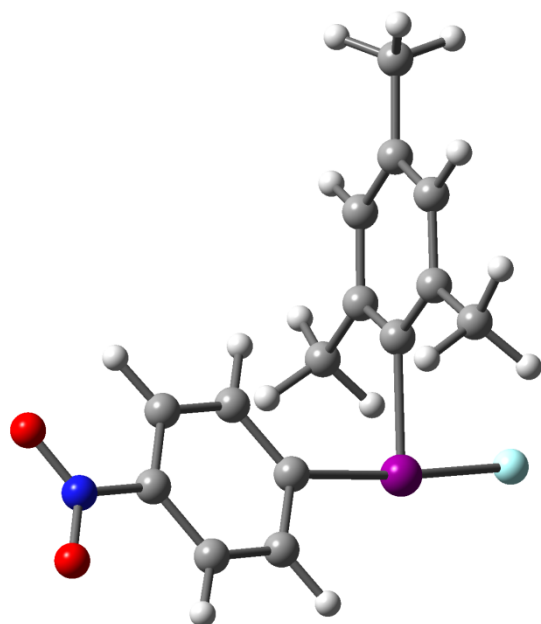

|   |           |           |           |
|---|-----------|-----------|-----------|
| C | -3.649702 | -0.768022 | 0.289801  |
| C | -2.387033 | -1.359339 | 0.335982  |
| C | -1.250648 | -0.616318 | -0.017432 |
| C | -1.368510 | 0.720796  | -0.416632 |
| C | -2.626965 | 1.323447  | -0.461598 |
| C | -3.750033 | 0.568920  | -0.108637 |
| H | -4.545696 | -1.325422 | 0.561931  |
| H | -2.301425 | -2.401600 | 0.654622  |
| H | -0.487235 | 1.302978  | -0.692744 |
| H | -2.744145 | 2.362373  | -0.769278 |
| I | 0.654195  | -1.705664 | 0.021360  |
| C | 1.785499  | 0.100255  | 0.052319  |
| C | 2.411113  | 0.503641  | -1.142015 |
| C | 1.887779  | 0.800572  | 1.267979  |
| C | 3.163830  | 1.687633  | -1.086262 |
| C | 2.655658  | 1.977393  | 1.249526  |
| C | 3.299511  | 2.435458  | 0.092366  |
| H | 3.657843  | 2.029586  | -2.000341 |
| H | 2.750259  | 2.547044  | 2.178458  |
| F | 2.662057  | -2.671753 | 0.049282  |
| C | 1.228754  | 0.359120  | 2.551228  |
| H | 0.131132  | 0.335924  | 2.459483  |
| H | 1.554711  | -0.650740 | 2.846106  |
| H | 1.482787  | 1.049190  | 3.366722  |
| C | 2.314594  | -0.266256 | -2.435473 |
| H | 2.682428  | -1.296134 | -2.308473 |
| H | 1.275068  | -0.328484 | -2.795137 |
| H | 2.913190  | 0.221029  | -3.216538 |
| C | 4.142051  | 3.687809  | 0.118284  |
| H | 3.832114  | 4.363941  | 0.927704  |
| H | 5.203525  | 3.437931  | 0.284348  |

|   |           |          |           |
|---|-----------|----------|-----------|
| H | 4.080943  | 4.231033 | -0.836011 |
| N | -5.078239 | 1.200805 | -0.158604 |
| O | -6.065210 | 0.514194 | 0.157168  |
| O | -5.147800 | 2.389681 | -0.515030 |

### TS\_MesF

|                                              |                             |
|----------------------------------------------|-----------------------------|
| Zero-point correction=                       | 0.255828 (Hartree/Particle) |
| Thermal correction to Energy=                | 0.277047                    |
| Thermal correction to Enthalpy=              | 0.277991                    |
| Thermal correction to Gibbs Free Energy=     | 0.202175                    |
| Sum of electronic and zero-point Energies=   | -896.951875                 |
| Sum of electronic and thermal Energies=      | -896.930656                 |
| Sum of electronic and thermal Enthalpies=    | -896.929712                 |
| Sum of electronic and thermal Free Energies= | -897.005528                 |
| E(RB-P86) =                                  | -897.207702828 A.U.         |

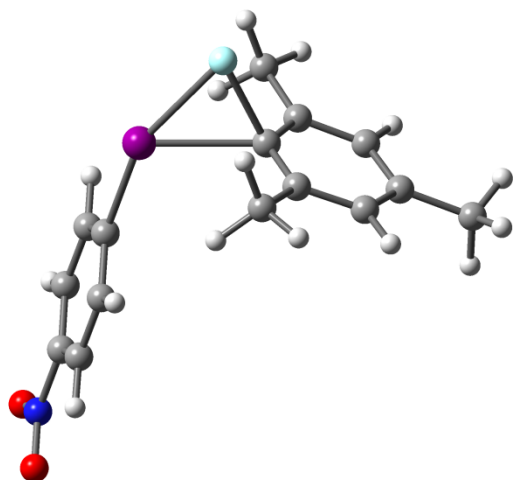

|   |           |           |           |
|---|-----------|-----------|-----------|
| C | 3.048061  | 1.867411  | -1.134718 |
| C | 2.499821  | 0.570598  | -1.218778 |
| C | 2.215127  | -0.021858 | 0.007553  |
| C | 2.479940  | 0.502002  | 1.269083  |
| C | 3.029743  | 1.800741  | 1.265820  |
| C | 3.310834  | 2.502634  | 0.086236  |
| H | 3.283478  | 2.376285  | -2.074931 |
| H | 3.249162  | 2.256716  | 2.236493  |
| I | 0.475508  | -1.729021 | -0.051414 |
| C | -1.416723 | -0.737387 | -0.028650 |
| C | -2.099695 | -0.582223 | 1.187525  |
| C | -1.957110 | -0.249345 | -1.228038 |
| C | -3.338348 | 0.059420  | 1.205158  |
| C | -3.193959 | 0.395663  | -1.215365 |
| C | -3.864858 | 0.540252  | 0.002596  |
| H | -3.892637 | 0.189595  | 2.134205  |
| H | -3.637873 | 0.782093  | -2.132397 |
| F | 2.923061  | -1.923066 | -0.042290 |
| C | 2.279808  | -0.087698 | -2.555044 |



|   |           |           |           |
|---|-----------|-----------|-----------|
| H | 1.208397  | -0.258024 | -2.748707 |
| H | 2.673238  | 0.544860  | -3.362170 |
| H | 2.779007  | -1.066672 | -2.596289 |
| C | 2.233151  | -0.227333 | 2.563076  |
| H | 1.157072  | -0.397392 | 2.728545  |
| H | 2.724483  | -1.211165 | 2.558191  |
| H | 2.617961  | 0.355937  | 3.410536  |
| C | 3.873764  | 3.905263  | 0.130431  |
| H | 4.483559  | 4.063894  | 1.032038  |
| H | 4.498969  | 4.114571  | -0.750003 |
| H | 3.066388  | 4.657046  | 0.144901  |
| H | -1.426371 | -0.372824 | -2.172865 |
| H | -1.676984 | -0.961807 | 2.118853  |
| N | -5.171664 | 1.222665  | 0.019509  |
| O | -5.627264 | 1.637029  | -1.059399 |
| O | -5.749363 | 1.348611  | 1.112059  |

**Ar = *p*-MeOC<sub>6</sub>H<sub>4</sub>**

**TS\_ArF**

|                                              |                             |
|----------------------------------------------|-----------------------------|
| Zero-point correction=                       | 0.284996 (Hartree/Particle) |
| Thermal correction to Energy=                | 0.306312                    |
| Thermal correction to Enthalpy=              | 0.307256                    |
| Thermal correction to Gibbs Free Energy=     | 0.231824                    |
| Sum of electronic and zero-point Energies=   | -806.885056                 |
| Sum of electronic and thermal Energies=      | -806.863740                 |
| Sum of electronic and thermal Enthalpies=    | -806.862796                 |
| Sum of electronic and thermal Free Energies= | -806.938228                 |
| E(RB-P86) =                                  | -807.170051643 A.U.         |

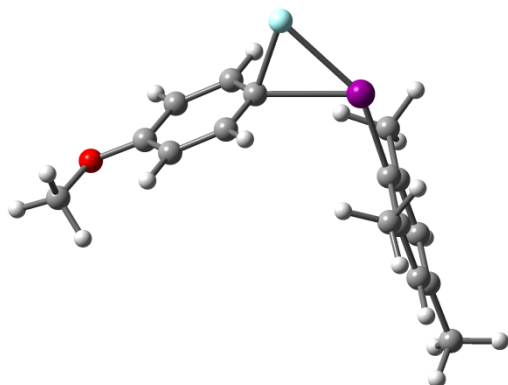

|   |           |           |           |
|---|-----------|-----------|-----------|
| C | -3.076759 | 0.603383  | 1.434054  |
| C | -2.145939 | -0.433110 | 1.325299  |
| C | -1.721205 | -0.807087 | 0.051131  |
| C | -2.193094 | -0.198311 | -1.103195 |
| C | -3.129909 | 0.843858  | -0.979659 |
| C | -3.572997 | 1.249516  | 0.287879  |
| H | -3.425660 | 0.919132  | 2.420062  |
| H | -3.492964 | 1.322678  | -1.889500 |
| I | 0.462646  | -1.754507 | -0.091826 |

|   |           |           |           |
|---|-----------|-----------|-----------|
| C | 1.820210  | -0.104157 | -0.022566 |
| C | 2.275676  | 0.451159  | -1.238027 |
| C | 2.243033  | 0.376218  | 1.235900  |
| C | 3.188764  | 1.514891  | -1.158850 |
| C | 3.156092  | 1.442271  | 1.245986  |
| C | 3.642989  | 2.022918  | 0.066253  |
| H | 3.552711  | 1.958072  | -2.090684 |
| H | 3.493770  | 1.828789  | 2.212311  |
| F | -1.887011 | -2.733320 | -0.102533 |
| C | 1.837946  | -0.044679 | -2.595814 |
| H | 2.096609  | -1.105146 | -2.743621 |
| H | 0.748897  | 0.044403  | -2.730053 |
| H | 2.325335  | 0.537279  | -3.389823 |
| C | 1.767389  | -0.200226 | 2.548166  |
| H | 0.675411  | -0.112880 | 2.657927  |
| H | 2.018167  | -1.269297 | 2.636509  |
| H | 2.234696  | 0.328953  | 3.389773  |
| C | 4.647224  | 3.148826  | 0.115301  |
| H | 4.565044  | 3.799734  | -0.767161 |
| H | 4.516636  | 3.763257  | 1.017892  |
| H | 5.676398  | 2.751652  | 0.135597  |
| H | -1.861856 | -0.514433 | -2.092369 |
| H | -1.779957 | -0.937753 | 2.219425  |
| O | -4.477809 | 2.261746  | 0.513929  |
| C | -5.006244 | 2.937189  | -0.637912 |
| H | -5.553483 | 2.239452  | -1.293078 |
| H | -5.698134 | 3.692430  | -0.247259 |
| H | -4.205360 | 3.432515  | -1.211455 |

**anti-isom**

|                                              |                             |
|----------------------------------------------|-----------------------------|
| Zero-point correction=                       | 0.286453 (Hartree/Particle) |
| Thermal correction to Energy=                | 0.308135                    |
| Thermal correction to Enthalpy=              | 0.309079                    |
| Thermal correction to Gibbs Free Energy=     | 0.231354                    |
| Sum of electronic and zero-point Energies=   | -806.918525                 |
| Sum of electronic and thermal Energies=      | -806.896843                 |
| Sum of electronic and thermal Enthalpies=    | -806.895899                 |
| Sum of electronic and thermal Free Energies= | -806.973624                 |
| E(RB-P86) =                                  | -807.204977491 A.U.         |

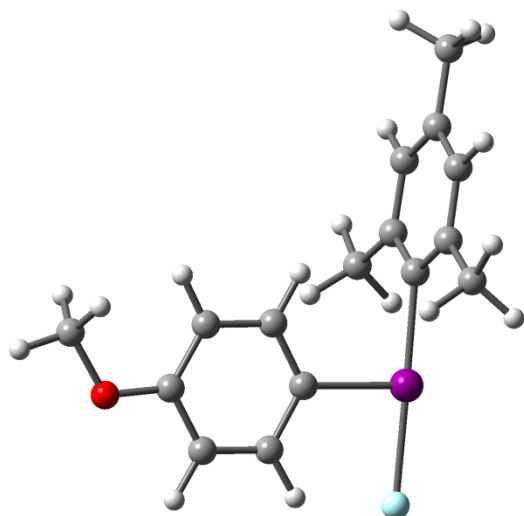

|   |           |           |           |
|---|-----------|-----------|-----------|
| C | -3.172689 | 1.395767  | 1.219166  |
| C | -2.177018 | 0.408059  | 1.241446  |
| C | -1.714404 | -0.090341 | 0.002067  |
| C | -2.227944 | 0.374869  | -1.226915 |
| C | -3.224850 | 1.365300  | -1.187412 |
| C | -3.711462 | 1.885260  | 0.018925  |
| H | -3.535580 | 1.794957  | 2.171519  |
| H | -3.628641 | 1.739760  | -2.133066 |
| I | -0.290790 | -1.734232 | -0.004760 |
| C | 1.425686  | -0.427141 | -0.004722 |
| C | 2.693764  | -1.008791 | 0.065841  |
| C | 1.249415  | 0.950402  | -0.073672 |
| C | 3.811005  | -0.175352 | 0.069096  |
| C | 2.377067  | 1.784397  | -0.070705 |
| C | 3.662698  | 1.223282  | 0.001543  |
| H | 4.815620  | -0.600626 | 0.123859  |
| H | 2.230718  | 2.863056  | -0.124646 |
| F | 1.238523  | -3.457076 | 0.001403  |
| C | -1.636984 | -0.066927 | 2.571331  |
| H | -1.844808 | -1.135848 | 2.737487  |
| H | -0.545124 | 0.064291  | 2.637944  |
| H | -2.095496 | 0.497190  | 3.395097  |
| C | -1.746901 | -0.132777 | -2.567581 |
| H | -0.656713 | -0.020244 | -2.679105 |
| H | -1.977750 | -1.200953 | -2.706166 |
| H | -2.228653 | 0.423527  | -3.383375 |
| C | -4.789345 | 2.942525  | 0.035621  |
| H | -5.706913 | 2.562276  | 0.513569  |
| H | -4.470536 | 3.825608  | 0.611790  |
| H | -5.047117 | 3.270063  | -0.981178 |
| H | 0.254508  | 1.395539  | -0.129280 |
| H | 2.783322  | -2.096322 | 0.111074  |
| O | 4.822981  | 1.946175  | 0.011650  |
| C | 4.715556  | 3.380083  | -0.059122 |

|   |          |          |           |
|---|----------|----------|-----------|
| H | 5.745755 | 3.752786 | -0.037427 |
| H | 4.227721 | 3.693873 | -0.995676 |
| H | 4.159426 | 3.777927 | 0.804601  |

### TS\_isom

|                                              |                             |
|----------------------------------------------|-----------------------------|
| Zero-point correction=                       | 0.285990 (Hartree/Particle) |
| Thermal correction to Energy=                | 0.307152                    |
| Thermal correction to Enthalpy=              | 0.308096                    |
| Thermal correction to Gibbs Free Energy=     | 0.233344                    |
| Sum of electronic and zero-point Energies=   | -806.906123                 |
| Sum of electronic and thermal Energies=      | -806.884961                 |
| Sum of electronic and thermal Enthalpies=    | -806.884017                 |
| Sum of electronic and thermal Free Energies= | -806.958770                 |
| E(RB-P86) =                                  | -807.192113176 A.U.         |

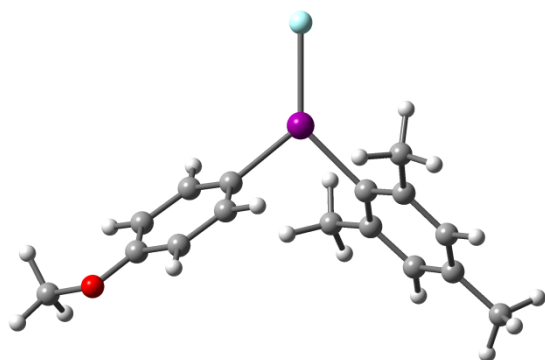

|   |           |           |           |
|---|-----------|-----------|-----------|
| C | 3.482572  | -1.288814 | 1.043276  |
| C | 2.558692  | -0.229810 | 1.045622  |
| C | 1.735936  | -0.100494 | -0.090204 |
| C | 1.825275  | -0.950736 | -1.210004 |
| C | 2.766196  | -1.991284 | -1.145268 |
| C | 3.600802  | -2.177664 | -0.033891 |
| H | 4.129097  | -1.415898 | 1.916778  |
| H | 2.844734  | -2.674125 | -1.996683 |
| I | 0.335691  | 1.567544  | -0.134487 |
| C | -1.436049 | 0.372527  | 0.129090  |
| C | -2.367605 | 0.327153  | -0.909182 |
| C | -1.682030 | -0.265034 | 1.353284  |
| C | -3.564065 | -0.381216 | -0.737369 |
| C | -2.864846 | -0.978125 | 1.520744  |
| C | -3.813034 | -1.040878 | 0.478758  |
| H | -4.283432 | -0.412600 | -1.555479 |
| H | -3.076543 | -1.490123 | 2.461772  |
| F | 0.570022  | 3.985798  | -0.386916 |
| C | 2.504292  | 0.699120  | 2.237010  |
| H | 2.743784  | 1.736977  | 1.956106  |
| H | 1.507878  | 0.711628  | 2.704803  |
| H | 3.230238  | 0.382082  | 2.997715  |
| C | 0.965625  | -0.800105 | -2.440724 |
| H | -0.100093 | -0.957334 | -2.211064 |

|   |           |           |           |
|---|-----------|-----------|-----------|
| H | 1.059091  | 0.205627  | -2.879947 |
| H | 1.257507  | -1.533767 | -3.204092 |
| C | 4.622229  | -3.289177 | -0.012871 |
| H | 4.877243  | -3.580683 | 1.016064  |
| H | 4.258396  | -4.177887 | -0.549050 |
| H | 5.555548  | -2.969350 | -0.506400 |
| H | -0.963971 | -0.214100 | 2.173131  |
| H | -2.179802 | 0.835400  | -1.857025 |
| O | -4.937395 | -1.761062 | 0.750311  |
| C | -5.943903 | -1.848695 | -0.277859 |
| H | -5.544441 | -2.341309 | -1.178119 |
| H | -6.746767 | -2.458051 | 0.151417  |
| H | -6.331636 | -0.850625 | -0.534854 |

### syn-isom

|                                              |                             |
|----------------------------------------------|-----------------------------|
| Zero-point correction=                       | 0.286673 (Hartree/Particle) |
| Thermal correction to Energy=                | 0.308277                    |
| Thermal correction to Enthalpy=              | 0.309221                    |
| Thermal correction to Gibbs Free Energy=     | 0.233760                    |
| Sum of electronic and zero-point Energies=   | -806.919177                 |
| Sum of electronic and thermal Energies=      | -806.897573                 |
| Sum of electronic and thermal Enthalpies=    | -806.896628                 |
| Sum of electronic and thermal Free Energies= | -806.972090                 |
| E(RB-P86) =                                  | -807.205849795 A.U.         |

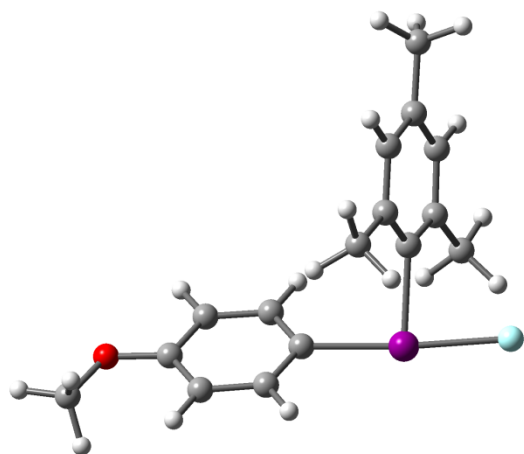

|   |           |           |           |
|---|-----------|-----------|-----------|
| C | -3.723390 | -0.084752 | 0.587506  |
| C | -2.499079 | -0.752750 | 0.737345  |
| C | -1.430680 | -0.477465 | -0.119736 |
| C | -1.579357 | 0.476140  | -1.138336 |
| C | -2.787239 | 1.153558  | -1.287395 |
| C | -3.868420 | 0.875010  | -0.427470 |
| H | -4.542589 | -0.315088 | 1.268702  |
| H | -2.396728 | -1.489661 | 1.538744  |
| H | -0.755438 | 0.702469  | -1.819321 |
| H | -2.915337 | 1.900898  | -2.073818 |
| I | 0.385990  | -1.657212 | 0.087936  |

|   |           |           |           |
|---|-----------|-----------|-----------|
| C | 1.630272  | 0.080918  | 0.099468  |
| C | 2.446629  | 0.307320  | -1.023480 |
| C | 1.595991  | 0.926398  | 1.223253  |
| C | 3.245707  | 1.462381  | -0.999127 |
| C | 2.417591  | 2.065908  | 1.178001  |
| C | 3.244816  | 2.352484  | 0.083770  |
| H | 3.888936  | 1.663564  | -1.860987 |
| H | 2.407647  | 2.743971  | 2.036608  |
| F | 2.369088  | -2.755566 | 0.315219  |
| C | 0.745283  | 0.670103  | 2.441789  |
| H | -0.329187 | 0.720696  | 2.203928  |
| H | 0.938827  | -0.328029 | 2.865564  |
| H | 0.955878  | 1.417441  | 3.218520  |
| C | 2.510077  | -0.623995 | -2.208611 |
| H | 2.762721  | -1.644939 | -1.883053 |
| H | 1.544730  | -0.675425 | -2.737694 |
| H | 3.269355  | -0.282127 | -2.924744 |
| C | 4.138512  | 3.569808  | 0.085873  |
| H | 3.697611  | 4.390953  | 0.669398  |
| H | 5.116542  | 3.334067  | 0.538446  |
| H | 4.328814  | 3.929489  | -0.935670 |
| O | -5.010337 | 1.589889  | -0.661321 |
| C | -6.144336 | 1.331886  | 0.187372  |
| H | -5.912400 | 1.564139  | 1.238958  |
| H | -6.936442 | 1.998738  | -0.171350 |
| H | -6.473773 | 0.284344  | 0.099392  |

### TS\_MesF

|                                              |                             |
|----------------------------------------------|-----------------------------|
| Zero-point correction=                       | 0.285346 (Hartree/Particle) |
| Thermal correction to Energy=                | 0.306583                    |
| Thermal correction to Enthalpy=              | 0.307528                    |
| Thermal correction to Gibbs Free Energy=     | 0.232950                    |
| Sum of electronic and zero-point Energies=   | -806.888922                 |
| Sum of electronic and thermal Energies=      | -806.867685                 |
| Sum of electronic and thermal Enthalpies=    | -806.866741                 |
| Sum of electronic and thermal Free Energies= | -806.941319                 |
| E(RB-P86) =                                  | -807.174268177 A.U.         |

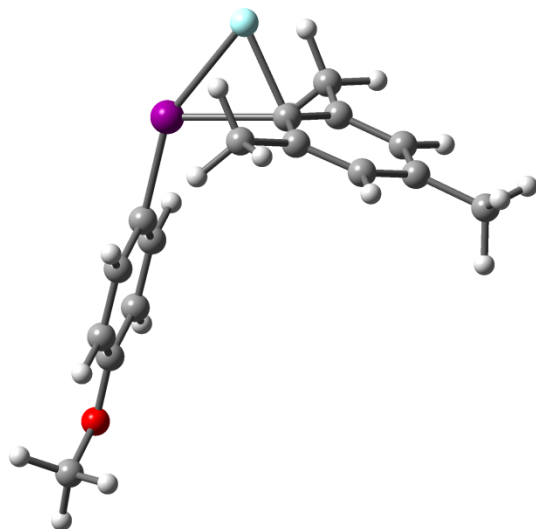

|   |           |           |           |
|---|-----------|-----------|-----------|
| C | 2.818701  | 1.885528  | -1.114589 |
| C | 2.246416  | 0.604740  | -1.248549 |
| C | 2.036768  | -0.083008 | -0.053841 |
| C | 2.389885  | 0.362220  | 1.218793  |
| C | 2.957318  | 1.652071  | 1.270390  |
| C | 3.171880  | 2.432532  | 0.126822  |
| H | 2.997842  | 2.457554  | -2.030980 |
| H | 3.246201  | 2.038156  | 2.253441  |
| I | 0.223718  | -1.709416 | -0.115173 |
| C | -1.602062 | -0.643557 | 0.077987  |
| C | -2.183175 | -0.468763 | 1.345816  |
| C | -2.224499 | -0.116977 | -1.059412 |
| C | -3.385513 | 0.221509  | 1.465379  |
| C | -3.432632 | 0.579828  | -0.943616 |
| C | -4.018270 | 0.751643  | 0.323141  |
| H | -3.852896 | 0.360798  | 2.442540  |
| H | -3.903158 | 0.978342  | -1.842341 |
| F | 2.726630  | -1.941764 | -0.278791 |
| C | 1.913451  | 0.048057  | -2.608519 |
| H | 0.823352  | -0.022325 | -2.758260 |
| H | 2.320533  | 0.694335  | -3.398346 |
| H | 2.324819  | -0.964254 | -2.729893 |
| C | 2.210206  | -0.450505 | 2.474594  |
| H | 1.143176  | -0.584479 | 2.716925  |
| H | 2.647043  | -1.452831 | 2.358760  |
| H | 2.689486  | 0.049055  | 3.327779  |
| C | 3.755454  | 3.824110  | 0.228593  |
| H | 4.395534  | 4.056055  | -0.635957 |
| H | 2.960697  | 4.588937  | 0.259461  |
| H | 4.356949  | 3.940183  | 1.142157  |
| H | -1.781708 | -0.247708 | -2.048747 |
| H | -1.706020 | -0.874786 | 2.239803  |
| O | -5.190450 | 1.411270  | 0.549627  |
| C | -5.877189 | 1.969925  | -0.587426 |

|   |           |          |           |
|---|-----------|----------|-----------|
| H | -6.163957 | 1.181518 | -1.300969 |
| H | -6.776907 | 2.444748 | -0.180720 |
| H | -5.254543 | 2.725371 | -1.091763 |

***p*-Tol(Ph)IBr system**

**TS\_PhBr**

|                                              |                             |
|----------------------------------------------|-----------------------------|
| Zero-point correction=                       | 0.199441 (Hartree/Particle) |
| Thermal correction to Energy=                | 0.215278                    |
| Thermal correction to Enthalpy=              | 0.216222                    |
| Thermal correction to Gibbs Free Energy=     | 0.150955                    |
| Sum of electronic and zero-point Energies=   | -527.320439                 |
| Sum of electronic and thermal Energies=      | -527.304602                 |
| Sum of electronic and thermal Enthalpies=    | -527.303658                 |
| Sum of electronic and thermal Free Energies= | -527.368925                 |
| E(RB-P86) =                                  | -527.519879636 A.U          |

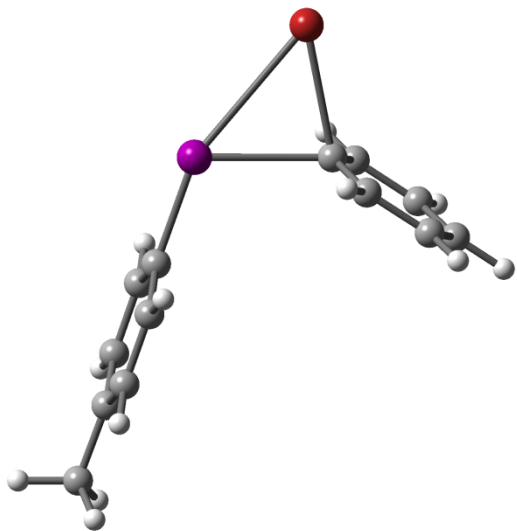

|   |           |           |           |
|---|-----------|-----------|-----------|
| C | -1.621681 | 2.949417  | 1.216690  |
| C | -1.571091 | 1.544691  | 1.232746  |
| C | -1.561177 | 0.905614  | 0.002523  |
| C | -1.574664 | 1.549594  | -1.225142 |
| C | -1.625237 | 2.954202  | -1.203470 |
| C | -1.649554 | 3.653847  | 0.008045  |
| H | -1.638331 | 3.479660  | 2.172326  |
| H | -1.644790 | 3.488163  | -2.156981 |
| I | -0.094997 | -1.176096 | -0.004270 |
| C | 1.934204  | -0.554767 | -0.001408 |
| C | 2.587962  | -0.324863 | -1.219754 |
| C | 2.594843  | -0.359468 | 1.218306  |
| C | 3.921254  | 0.092394  | -1.205956 |
| C | 3.929362  | 0.057340  | 1.208076  |
| C | 4.615629  | 0.287067  | 0.002434  |
| H | 4.430978  | 0.271599  | -2.156683 |
| H | 4.445526  | 0.208134  | 2.160137  |
| H | 2.082057  | -0.530502 | 2.166612  |





|    |           |           |           |
|----|-----------|-----------|-----------|
| H  | -4.414875 | -0.343823 | 2.138587  |
| H  | -1.959129 | -0.659139 | 2.148563  |
| H  | -1.925102 | -0.399393 | -2.181676 |
| H  | -4.381640 | -0.085261 | -2.171150 |
| I  | 0.348653  | -0.866013 | -0.010458 |
| C  | 0.818449  | 1.213664  | 0.008205  |
| C  | 1.071972  | 1.849848  | -1.207411 |
| C  | 0.844510  | 1.877232  | 1.235116  |
| C  | 1.362123  | 3.220126  | -1.182832 |
| C  | 1.135717  | 3.247530  | 1.234353  |
| C  | 1.393485  | 3.915101  | 0.031619  |
| H  | 1.564177  | 3.739039  | -2.122214 |
| H  | 1.162233  | 3.787411  | 2.183208  |
| H  | 0.647610  | 1.352989  | 2.171005  |
| H  | 1.050753  | 1.304178  | -2.151422 |
| Br | 3.389271  | -1.319214 | 0.014568  |
| C  | -6.079388 | -0.032708 | -0.015684 |
| H  | -6.576176 | -1.014176 | 0.065641  |
| H  | -6.415260 | 0.572727  | 0.839036  |
| H  | -6.433222 | 0.441434  | -0.941963 |
| H  | 1.622033  | 4.982804  | 0.040792  |

**syn-isom**

|                                              |                             |
|----------------------------------------------|-----------------------------|
| Zero-point correction=                       | 0.201229 (Hartree/Particle) |
| Thermal correction to Energy=                | 0.217486                    |
| Thermal correction to Enthalpy=              | 0.218430                    |
| Thermal correction to Gibbs Free Energy=     | 0.151636                    |
| Sum of electronic and zero-point Energies=   | -527.353714                 |
| Sum of electronic and thermal Energies=      | -527.337457                 |
| Sum of electronic and thermal Enthalpies=    | -527.336513                 |
| Sum of electronic and thermal Free Energies= | -527.403308                 |
| E(RB-P86) =                                  | -527.554943298 A.U          |

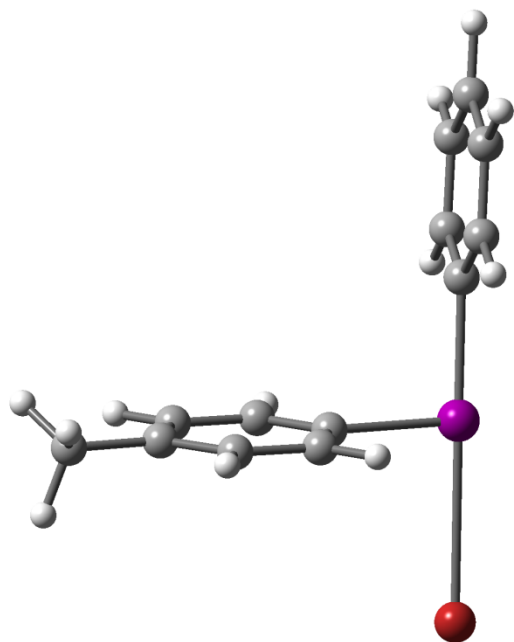

|    |           |           |           |
|----|-----------|-----------|-----------|
| C  | -4.327213 | 0.147991  | 1.154182  |
| C  | -3.004843 | -0.316064 | 1.163080  |
| C  | -2.280645 | -0.301773 | -0.032322 |
| C  | -2.839672 | 0.149446  | -1.231461 |
| C  | -4.160923 | 0.614412  | -1.222960 |
| C  | -4.901546 | 0.613182  | -0.034333 |
| H  | -4.904799 | 0.143896  | 2.081314  |
| H  | -2.555952 | -0.678623 | 2.090044  |
| H  | -2.265454 | 0.144953  | -2.160153 |
| H  | -4.610606 | 0.973351  | -2.151538 |
| H  | -5.932558 | 0.973486  | -0.035862 |
| I  | -0.247986 | -1.082554 | -0.023736 |
| C  | 0.651954  | 0.844548  | 0.017080  |
| C  | 1.084188  | 1.405019  | -1.184641 |
| C  | 0.774218  | 1.505894  | 1.239584  |
| C  | 1.657048  | 2.681001  | -1.148936 |
| C  | 1.350350  | 2.780542  | 1.244318  |
| C  | 1.801831  | 3.386444  | 0.058276  |
| H  | 1.994777  | 3.133271  | -2.085031 |
| H  | 1.448394  | 3.310584  | 2.195389  |
| C  | 2.447209  | 4.749732  | 0.086094  |
| H  | 2.007842  | 5.384749  | 0.868876  |
| H  | 3.525345  | 4.662777  | 0.302082  |
| H  | 2.345109  | 5.262048  | -0.880965 |
| H  | 0.433160  | 1.051563  | 2.170803  |
| H  | 0.983333  | 0.872065  | -2.130865 |
| Br | 2.604655  | -2.212029 | 0.009890  |

**TS\_p-TolBr**

Zero-point correction=

0.199423 (Hartree/Particle)

Thermal correction to Energy= 0.215326  
 Thermal correction to Enthalpy= 0.216271  
 Thermal correction to Gibbs Free Energy= 0.150368  
 Sum of electronic and zero-point Energies= -527.318970  
 Sum of electronic and thermal Energies= -527.303067  
 Sum of electronic and thermal Enthalpies= -527.302123  
 Sum of electronic and thermal Free Energies= -527.368026  
 E(RB-P86) = -527.518393261 A.U

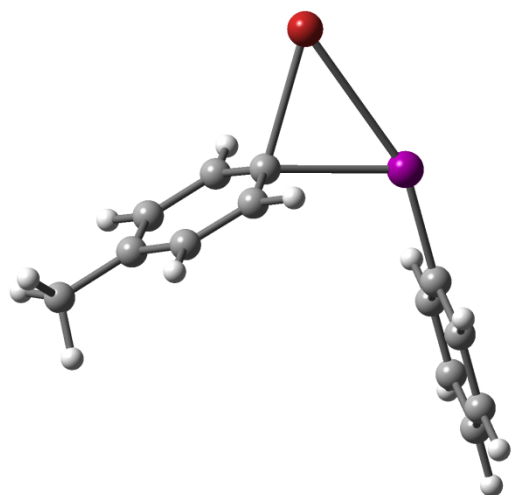

|   |           |           |           |
|---|-----------|-----------|-----------|
| C | -1.959115 | 2.330153  | 1.224864  |
| C | -1.527565 | 0.991209  | 1.239663  |
| C | -1.351862 | 0.381591  | 0.011204  |
| C | -1.551597 | 1.000454  | -1.212073 |
| C | -1.982184 | 2.335981  | -1.181712 |
| C | -2.192460 | 3.022582  | 0.027081  |
| H | -2.112457 | 2.830144  | 2.185738  |
| H | -2.154951 | 2.841040  | -2.136841 |
| I | 0.612283  | -1.250800 | -0.019135 |
| C | 2.431406  | -0.145641 | -0.007929 |
| C | 2.970671  | 0.298115  | -1.222746 |
| C | 3.057221  | 0.129536  | 1.215323  |
| C | 4.168217  | 1.022623  | -1.206212 |
| C | 4.255649  | 0.852842  | 1.213481  |
| C | 4.810019  | 1.298902  | 0.007374  |
| H | 4.598560  | 1.369737  | -2.148279 |
| H | 4.754335  | 1.067336  | 2.161369  |
| C | -2.642627 | 4.465677  | 0.029088  |
| H | -2.874160 | 4.809733  | 1.046853  |
| H | -1.861420 | 5.126965  | -0.380311 |
| H | -3.541446 | 4.605161  | -0.591731 |
| H | 2.624744  | -0.217132 | 2.155501  |
| H | 5.744469  | 1.864122  | 0.013339  |
| H | 2.471703  | 0.080145  | -2.168577 |
| H | -1.400594 | 0.484452  | -2.159833 |
| H | -1.358750 | 0.471076  | 2.182127  |

Br -2.521590 -1.912702 0.000868

#### h. Other non-copper containing species

##### 2,6-Me<sub>2</sub>C<sub>6</sub>H<sub>3</sub>F

Zero-point correction= 0.142263 (Hartree/Particle)  
Thermal correction to Energy= 0.151265  
Thermal correction to Enthalpy= 0.152209  
Thermal correction to Gibbs Free Energy= 0.108168  
Sum of electronic and zero-point Energies= -410.094343  
Sum of electronic and thermal Energies= -410.085341  
Sum of electronic and thermal Enthalpies= -410.084397  
Sum of electronic and thermal Free Energies= -410.128438  
E(RB-P86) = -410.236606028 A.U.

C 0.000000 -0.633205 0.000272  
C 1.240525 0.012799 0.000042  
C -1.240525 0.012799 0.000070  
C 1.212371 1.417661 -0.000129  
C -1.212371 1.417661 -0.000084  
C 0.000000 2.115411 0.000042  
H 2.159999 1.963113 -0.000312  
H -2.159999 1.963113 -0.000215  
F 0.000000 -2.010112 -0.000230  
C 2.530014 -0.769732 0.000073  
H 2.606212 -1.420879 0.885298  
H 2.605315 -1.422527 -0.883993  
H 3.392300 -0.089076 -0.000974  
C -2.530014 -0.769732 0.000056  
H -2.605877 -1.421522 -0.884713  
H -2.605650 -1.421885 0.884579  
H -3.392300 -0.089076 0.000282  
H 0.000000 3.207775 0.000072

##### 2,6-Me<sub>2</sub>C<sub>6</sub>H<sub>3</sub>I

Zero-point correction= 0.140299 (Hartree/Particle)  
Thermal correction to Energy= 0.149656  
Thermal correction to Enthalpy= 0.150600  
Thermal correction to Gibbs Free Energy= 0.104704  
Sum of electronic and zero-point Energies= -321.643633  
Sum of electronic and thermal Energies= -321.634276  
Sum of electronic and thermal Enthalpies= -321.633332  
Sum of electronic and thermal Free Energies= -321.679228  
E(RB-P86) = -321.783932415 A.U.

C -2.589516 -1.208104 -0.000124  
C -1.183062 -1.239699 0.000239  
C -0.511223 0.000000 0.000417  
C -1.183062 1.239699 0.000239  
C -2.589516 1.208104 -0.000124  
C -3.288696 0.000000 -0.000224

|   |           |           |           |
|---|-----------|-----------|-----------|
| H | -3.134143 | -2.156055 | -0.000384 |
| H | -3.134143 | 2.156055  | -0.000384 |
| I | 1.622148  | 0.000000  | -0.000080 |
| C | -0.466751 | -2.566590 | 0.000171  |
| H | 0.181382  | -2.675161 | -0.884479 |
| H | 0.181824  | -2.674945 | 0.884511  |
| H | -1.189653 | -3.394060 | 0.000422  |
| C | -0.466751 | 2.566590  | 0.000171  |
| H | 0.181825  | 2.674945  | 0.884511  |
| H | 0.181382  | 2.675161  | -0.884479 |
| H | -1.189653 | 3.394060  | 0.000422  |
| H | -4.381209 | 0.000000  | -0.000475 |

### 3,5-Me<sub>2</sub>C<sub>6</sub>H<sub>3</sub>F

|                                              |                             |
|----------------------------------------------|-----------------------------|
| Zero-point correction=                       | 0.141749 (Hartree/Particle) |
| Thermal correction to Energy=                | 0.150955                    |
| Thermal correction to Enthalpy=              | 0.151899                    |
| Thermal correction to Gibbs Free Energy=     | 0.105544                    |
| Sum of electronic and zero-point Energies=   | -410.094411                 |
| Sum of electronic and thermal Energies=      | -410.085205                 |
| Sum of electronic and thermal Enthalpies=    | -410.084261                 |
| Sum of electronic and thermal Free Energies= | -410.130617                 |
| E(RB-P86) =                                  | -410.236160433 A.U.         |

|   |           |           |           |
|---|-----------|-----------|-----------|
| C | -0.000050 | 1.404456  | 0.001088  |
| C | 1.223938  | 0.745796  | -0.000948 |
| C | -1.223976 | 0.745732  | -0.000655 |
| C | 1.229933  | -0.659778 | -0.004068 |
| C | -1.229875 | -0.659868 | -0.003842 |
| C | 0.000039  | -1.339324 | -0.006841 |
| F | -0.000072 | 2.778949  | 0.001084  |
| H | 0.000080  | -2.433367 | -0.013241 |
| H | -2.152725 | 1.320621  | -0.002283 |
| H | 2.152637  | 1.320766  | -0.002798 |
| C | 2.538756  | -1.415253 | 0.003791  |
| H | 3.208027  | -1.063978 | -0.797129 |
| H | 3.073287  | -1.270480 | 0.957023  |
| H | 2.377106  | -2.493835 | -0.131570 |
| C | -2.538681 | -1.415376 | 0.003654  |
| H | -3.076302 | -1.265956 | 0.954403  |
| H | -3.205399 | -1.068048 | -0.801146 |
| H | -2.376565 | -2.494575 | -0.126085 |

### 3,5-Me<sub>2</sub>C<sub>6</sub>H<sub>3</sub>I

|                                            |                             |
|--------------------------------------------|-----------------------------|
| Zero-point correction=                     | 0.139629 (Hartree/Particle) |
| Thermal correction to Energy=              | 0.149577                    |
| Thermal correction to Enthalpy=            | 0.150521                    |
| Thermal correction to Gibbs Free Energy=   | 0.101278                    |
| Sum of electronic and zero-point Energies= | -321.645548                 |
| Sum of electronic and thermal Energies=    | -321.635600                 |
| Sum of electronic and thermal Enthalpies=  | -321.634656                 |

Sum of electronic and thermal Free Energies= -321.683899  
E(RB-P86) = -321.785176728 A.U.

|   |           |           |           |
|---|-----------|-----------|-----------|
| C | -0.056887 | 0.000010  | 0.002161  |
| C | -0.736596 | -1.220699 | -0.002389 |
| C | -0.736590 | 1.220695  | -0.002390 |
| C | -2.142810 | -1.227762 | -0.010220 |
| C | -2.142830 | 1.227749  | -0.010223 |
| C | -2.823528 | 0.000002  | -0.018504 |
| H | -3.917948 | -0.000003 | -0.036655 |
| H | -0.187527 | 2.164701  | -0.006819 |
| H | -0.187520 | -2.164697 | -0.006813 |
| C | -2.899768 | -2.535824 | 0.010505  |
| H | -2.322700 | -3.342396 | -0.464497 |
| H | -3.111498 | -2.848850 | 1.046843  |
| H | -3.865551 | -2.446099 | -0.508046 |
| C | -2.899728 | 2.535845  | 0.010505  |
| H | -3.109195 | 2.850182  | 1.046907  |
| H | -2.323646 | 3.341826  | -0.466710 |
| H | -3.866603 | 2.445509  | -0.505883 |
| I | 2.066502  | -0.000005 | 0.000472  |

#### DMF

Zero-point correction= 0.098925 (Hartree/Particle)  
Thermal correction to Energy= 0.105118  
Thermal correction to Enthalpy= 0.106062  
Thermal correction to Gibbs Free Energy= 0.069745  
Sum of electronic and zero-point Energies= -248.502470  
Sum of electronic and thermal Energies= -248.496277  
Sum of electronic and thermal Enthalpies= -248.495333  
Sum of electronic and thermal Free Energies= -248.531650  
E(RB-P86) = -248.601394741 A.U.

|   |           |           |           |
|---|-----------|-----------|-----------|
| C | 0.858477  | -0.647912 | 0.000027  |
| H | 0.751812  | -1.754554 | -0.000051 |
| O | 1.968314  | -0.094041 | -0.000035 |
| N | -0.342335 | -0.018728 | 0.000129  |
| C | -1.592678 | -0.769878 | -0.000030 |
| H | -2.188100 | -0.527279 | -0.894785 |
| H | -1.374038 | -1.846150 | -0.000058 |
| H | -2.188342 | -0.527454 | 0.894624  |
| C | -0.431370 | 1.437344  | -0.000032 |
| H | -0.970847 | 1.786489  | 0.894807  |
| H | 0.584674  | 1.849020  | -0.000585 |
| H | -0.971899 | 1.786028  | -0.894369 |

#### Fluoride

Zero-point correction= 0.000000 (Hartree/Particle)  
Thermal correction to Energy= 0.001416  
Thermal correction to Enthalpy= 0.002360  
Thermal correction to Gibbs Free Energy= -0.014159

Sum of electronic and zero-point Energies= -100.021874  
 Sum of electronic and thermal Energies= -100.020458  
 Sum of electronic and thermal Enthalpies= -100.019514  
 Sum of electronic and thermal Free Energies= -100.036033

**MesF**

Zero-point correction= 0.168677 (Hartree/Particle)  
 Thermal correction to Energy= 0.179491  
 Thermal correction to Enthalpy= 0.180436  
 Thermal correction to Gibbs Free Energy= 0.132252  
 Sum of electronic and zero-point Energies= -449.393578  
 Sum of electronic and thermal Energies= -449.382764  
 Sum of electronic and thermal Enthalpies= -449.381819  
 Sum of electronic and thermal Free Energies= -449.430003  
 E(RB-P86) = -449.562255035 A.U

C -1.057352 0.000000 0.005267  
 C -0.405723 1.236338 -0.000909  
 C -0.405723 -1.236338 -0.000947  
 C 0.998249 1.205007 -0.009903  
 C 0.998249 -1.205007 -0.009966  
 C 1.718465 0.000000 -0.010640  
 H 1.540055 2.156148 -0.018896  
 H 1.540054 -2.156147 -0.019033  
 F -2.435292 0.000000 0.010852  
 C -1.182212 2.530050 -0.002650  
 H -1.837691 2.605682 -0.885230  
 H -1.830288 2.612098 0.884793  
 H -0.497328 3.389550 -0.008531  
 C -1.182214 -2.530049 -0.002626  
 H -1.829076 -2.612760 0.885653  
 H -1.838899 -2.605021 -0.884352  
 H -0.497338 -3.389544 -0.010019  
 C 3.230983 -0.000001 0.012531  
 H 3.640042 0.891912 -0.485678  
 H 3.611730 -0.000037 1.048430  
 H 3.640041 -0.891880 -0.485740

**MesI**

Zero-point correction= 0.166572 (Hartree/Particle)  
 Thermal correction to Energy= 0.177911  
 Thermal correction to Enthalpy= 0.178856  
 Thermal correction to Gibbs Free Energy= 0.127710  
 Sum of electronic and zero-point Energies= -360.943669  
 Sum of electronic and thermal Energies= -360.932330  
 Sum of electronic and thermal Enthalpies= -360.931385  
 Sum of electronic and thermal Free Energies= -360.982531  
 E(RB-P86) = -361.110241023 A.U.

C -2.248256 1.200978 -0.009564  
 C -0.843022 1.235594 -0.004246



|   |           |           |           |
|---|-----------|-----------|-----------|
| C | -0.166045 | 0.000000  | -0.000107 |
| C | -0.843023 | -1.235594 | -0.004246 |
| C | -2.248256 | -1.200978 | -0.009564 |
| C | -2.970070 | 0.000001  | -0.009047 |
| H | -2.789486 | 2.152306  | -0.016766 |
| H | -2.789487 | -2.152305 | -0.016765 |
| I | 1.966840  | 0.000000  | 0.003411  |
| C | -0.131626 | 2.565517  | -0.007116 |
| H | 0.514146  | 2.679271  | 0.878717  |
| H | 0.519049  | 2.673431  | -0.890103 |
| H | -0.856999 | 3.390890  | -0.011710 |
| C | -0.131626 | -2.565517 | -0.007116 |
| H | 0.519049  | -2.673431 | -0.890103 |
| H | 0.514145  | -2.679271 | 0.878717  |
| H | -0.857000 | -3.390890 | -0.011710 |
| C | -4.480936 | 0.000000  | 0.017590  |
| H | -4.891249 | -0.892234 | -0.477892 |
| H | -4.856246 | -0.000044 | 1.055139  |
| H | -4.891248 | 0.892275  | -0.477819 |

**[Mes(Ph)I]<sup>+</sup>**

|                                              |                             |
|----------------------------------------------|-----------------------------|
| Zero-point correction=                       | 0.254628 (Hartree/Particle) |
| Thermal correction to Energy=                | 0.271691                    |
| Thermal correction to Enthalpy=              | 0.272635                    |
| Thermal correction to Gibbs Free Energy=     | 0.207761                    |
| Sum of electronic and zero-point Energies=   | -592.332083                 |
| Sum of electronic and thermal Energies=      | -592.315020                 |
| Sum of electronic and thermal Enthalpies=    | -592.314076                 |
| Sum of electronic and thermal Free Energies= | -592.378950                 |
| E(RB-P86) =                                  | -592.586711059 A.U          |

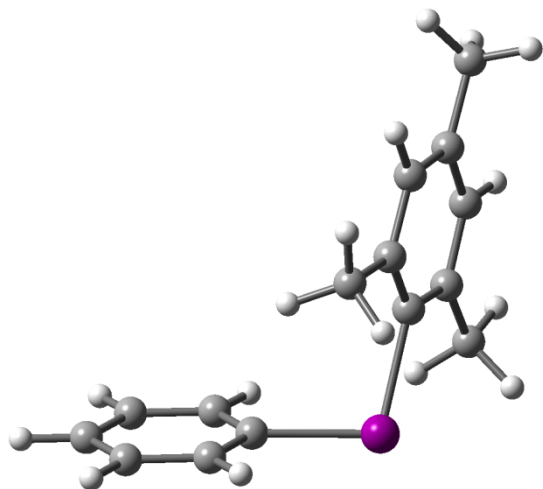

|   |           |           |           |
|---|-----------|-----------|-----------|
| C | -3.264238 | -0.063671 | 1.015150  |
| C | -2.061758 | -0.759393 | 0.811644  |
| C | -1.216421 | -0.243107 | -0.188809 |

|   |           |           |           |
|---|-----------|-----------|-----------|
| C | -1.505928 | 0.883942  | -0.981004 |
| C | -2.723635 | 1.527781  | -0.712019 |
| C | -3.611972 | 1.074274  | 0.273524  |
| H | -3.947502 | -0.434160 | 1.784197  |
| H | -2.977739 | 2.413538  | -1.300871 |
| I | 0.617548  | -1.285717 | -0.551847 |
| C | 2.072667  | 0.100350  | 0.180160  |
| C | 2.112720  | 0.388068  | 1.544845  |
| C | 2.966470  | 0.637807  | -0.747428 |
| C | 3.098874  | 1.275762  | 1.991911  |
| H | 1.408901  | -0.055035 | 2.249219  |
| C | 3.951153  | 1.512848  | -0.270425 |
| H | 2.908394  | 0.392788  | -1.808540 |
| C | 4.013551  | 1.832325  | 1.089963  |
| H | 3.149871  | 1.521603  | 3.054419  |
| H | 4.663553  | 1.946430  | -0.974982 |
| H | 4.781535  | 2.519089  | 1.451171  |
| C | -0.596178 | 1.417494  | -2.057001 |
| H | 0.345169  | 1.804928  | -1.636115 |
| H | -0.335813 | 0.639672  | -2.792166 |
| H | -1.084436 | 2.240904  | -2.593946 |
| C | -4.925194 | 1.777134  | 0.509605  |
| H | -4.846636 | 2.853681  | 0.301624  |
| H | -5.704112 | 1.369952  | -0.156930 |
| H | -5.272943 | 1.641065  | 1.543266  |
| C | -1.765800 | -1.989373 | 1.634348  |
| H | -1.687683 | -2.890065 | 1.005217  |
| H | -0.824198 | -1.895206 | 2.196270  |
| H | -2.572270 | -2.159603 | 2.359274  |

***anti*-[Mes(Ph)I(DMF)]<sup>+</sup>**

|                                              |                             |
|----------------------------------------------|-----------------------------|
| Zero-point correction=                       | 0.354593 (Hartree/Particle) |
| Thermal correction to Energy=                | 0.379965                    |
| Thermal correction to Enthalpy=              | 0.380909                    |
| Thermal correction to Gibbs Free Energy=     | 0.294241                    |
| Sum of electronic and zero-point Energies=   | -840.840830                 |
| Sum of electronic and thermal Energies=      | -840.815458                 |
| Sum of electronic and thermal Enthalpies=    | -840.814514                 |
| Sum of electronic and thermal Free Energies= | -840.901182                 |
| E(RB-P86) =                                  | -841.195423031 A.U          |

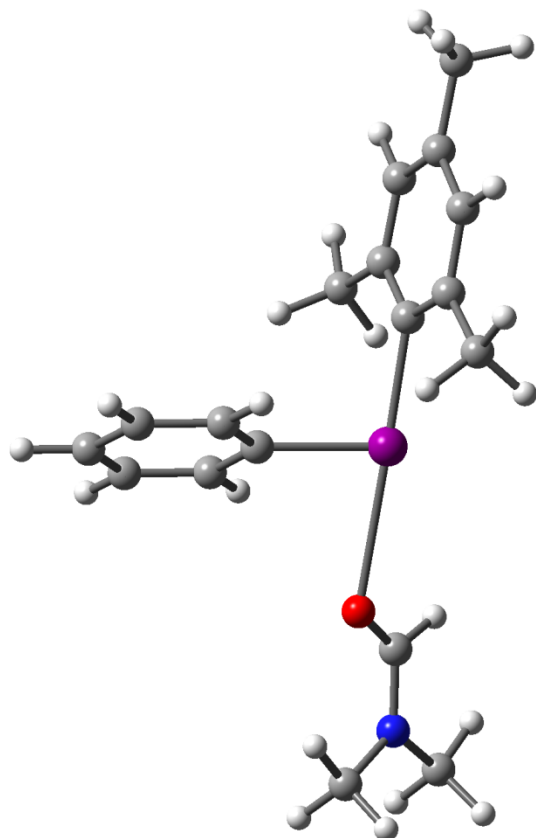

|   |           |           |           |
|---|-----------|-----------|-----------|
| C | 3.967698  | -0.271166 | -1.335125 |
| C | 2.566618  | -0.197791 | -1.267090 |
| C | 1.969040  | -0.604501 | -0.058189 |
| C | 2.698246  | -1.093730 | 1.045995  |
| C | 4.093225  | -1.144904 | 0.905860  |
| C | 4.745878  | -0.737557 | -0.267448 |
| H | 4.458566  | 0.047727  | -2.259061 |
| H | 4.684709  | -1.517481 | 1.747216  |
| I | -0.174316 | -0.560241 | 0.106257  |
| C | -0.428425 | 1.561418  | 0.179201  |
| C | -1.166053 | 2.164113  | -0.839813 |
| C | 0.134874  | 2.272780  | 1.238082  |
| C | -1.342137 | 3.552863  | -0.787680 |
| H | -1.597399 | 1.580852  | -1.653803 |
| C | -0.047945 | 3.661687  | 1.263144  |
| H | 0.698901  | 1.778235  | 2.029165  |
| C | -0.783539 | 4.297666  | 0.256790  |
| H | -1.914930 | 4.046693  | -1.575294 |
| H | 0.384113  | 4.239907  | 2.082428  |
| H | -0.922910 | 5.380131  | 0.287642  |
| C | -3.603272 | -1.202217 | -0.316694 |
| O | -2.899087 | -0.442874 | 0.387363  |
| H | -3.162956 | -1.835573 | -1.112041 |
| N | -4.934133 | -1.342645 | -0.203202 |

|   |           |           |           |
|---|-----------|-----------|-----------|
| C | -5.696410 | -0.591584 | 0.792499  |
| H | -6.206402 | -1.286886 | 1.476846  |
| H | -5.007706 | 0.045239  | 1.358285  |
| H | -6.452999 | 0.031885  | 0.292165  |
| C | -5.675150 | -2.255840 | -1.070751 |
| H | -4.981212 | -2.749434 | -1.763058 |
| H | -6.185827 | -3.021501 | -0.466990 |
| H | -6.428227 | -1.701289 | -1.651421 |
| C | 1.788938  | 0.308135  | -2.455699 |
| H | 1.003343  | -0.401384 | -2.759881 |
| H | 1.296715  | 1.269540  | -2.238595 |
| H | 2.457433  | 0.461773  | -3.313000 |
| C | 2.065600  | -1.570894 | 2.332415  |
| H | 1.438518  | -0.796093 | 2.799408  |
| H | 1.427016  | -2.453828 | 2.168996  |
| H | 2.843465  | -1.853143 | 3.054108  |
| C | 6.248028  | -0.824803 | -0.380362 |
| H | 6.737950  | -0.473066 | 0.539996  |
| H | 6.566005  | -1.869153 | -0.536701 |
| H | 6.622936  | -0.230922 | -1.225357 |

***syn*-[Mes(Ph)I(DMF)]<sup>+</sup>**

|                                              |                             |
|----------------------------------------------|-----------------------------|
| Zero-point correction=                       | 0.354587 (Hartree/Particle) |
| Thermal correction to Energy=                | 0.379935                    |
| Thermal correction to Enthalpy=              | 0.380879                    |
| Thermal correction to Gibbs Free Energy=     | 0.293996                    |
| Sum of electronic and zero-point Energies=   | -840.841659                 |
| Sum of electronic and thermal Energies=      | -840.816311                 |
| Sum of electronic and thermal Enthalpies=    | -840.815367                 |
| Sum of electronic and thermal Free Energies= | -840.902250                 |
| E(RB-P86) =                                  | -841.196245508 A.U.         |

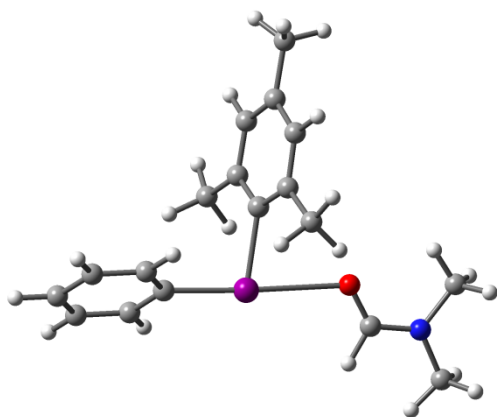

|   |           |           |           |
|---|-----------|-----------|-----------|
| C | -4.474779 | -1.004170 | 1.106617  |
| C | -3.099353 | -0.743985 | 1.135818  |
| C | -2.298123 | -1.292958 | 0.131134  |
| C | -2.821751 | -2.098384 | -0.884305 |
| C | -4.198678 | -2.358189 | -0.888504 |

|   |           |           |           |
|---|-----------|-----------|-----------|
| C | -5.022014 | -1.809884 | 0.100483  |
| H | -5.115500 | -0.578423 | 1.881763  |
| H | -2.678470 | -0.125739 | 1.929919  |
| H | -2.181407 | -2.517500 | -1.662740 |
| H | -4.622403 | -2.985694 | -1.675396 |
| H | -6.095162 | -2.011282 | 0.088829  |
| I | -0.170931 | -0.986504 | 0.150757  |
| C | -0.179960 | 1.147857  | -0.013564 |
| C | 0.197819  | 1.886442  | 1.122949  |
| C | -0.543098 | 1.714440  | -1.247922 |
| C | 0.180672  | 3.283401  | 0.984285  |
| C | -0.540754 | 3.118312  | -1.307905 |
| C | -0.184756 | 3.916303  | -0.212708 |
| H | 0.466518  | 3.890170  | 1.848260  |
| H | -0.825508 | 3.593598  | -2.250754 |
| C | 3.260743  | -1.484524 | -0.052150 |
| O | 2.499608  | -0.497551 | 0.081417  |
| H | 2.871324  | -2.520954 | -0.090063 |
| N | 4.596066  | -1.414987 | -0.162373 |
| C | 5.297135  | -0.132463 | -0.131731 |
| H | 5.855431  | 0.010611  | -1.069399 |
| H | 4.561938  | 0.670723  | -0.012691 |
| H | 6.006658  | -0.114947 | 0.709536  |
| C | 5.407694  | -2.620767 | -0.318228 |
| H | 4.758081  | -3.505275 | -0.320844 |
| H | 5.965332  | -2.581431 | -1.266401 |
| H | 6.125218  | -2.703948 | 0.512256  |
| C | 0.626170  | 1.268902  | 2.430816  |
| H | -0.166353 | 0.643855  | 2.871114  |
| H | 1.513880  | 0.631514  | 2.295331  |
| H | 0.876463  | 2.053728  | 3.156557  |
| C | -0.925300 | 0.914380  | -2.466815 |
| H | -0.145624 | 0.183610  | -2.732788 |
| H | -1.861738 | 0.356203  | -2.308783 |
| H | -1.074446 | 1.579913  | -3.327048 |
| C | -0.164772 | 5.420923  | -0.324830 |
| H | -0.494343 | 5.895978  | 0.610749  |
| H | 0.857823  | 5.779986  | -0.529719 |
| H | -0.809064 | 5.771516  | -1.143173 |

**anti-Mes(Ph)I(OTf)**

|                                              |                             |
|----------------------------------------------|-----------------------------|
| Zero-point correction=                       | 0.279876 (Hartree/Particle) |
| Thermal correction to Energy=                | 0.306874                    |
| Thermal correction to Enthalpy=              | 0.307818                    |
| Thermal correction to Gibbs Free Energy=     | 0.214773                    |
| Sum of electronic and zero-point Energies=   | -1554.224585                |
| Sum of electronic and thermal Energies=      | -1554.197587                |
| Sum of electronic and thermal Enthalpies=    | -1554.196643                |
| Sum of electronic and thermal Free Energies= | -1554.289687                |
| E(RB-P86) =                                  | -1554.50446068 A.U.         |

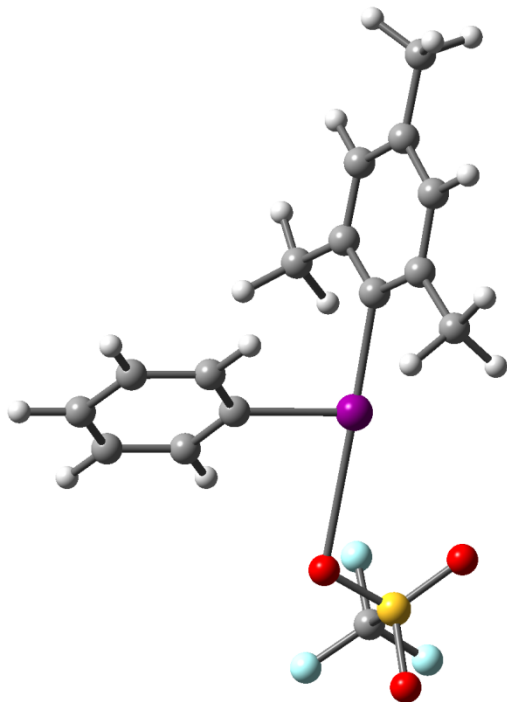

|   |           |           |           |
|---|-----------|-----------|-----------|
| C | -4.208840 | -0.722041 | 1.519934  |
| C | -2.854375 | -0.403970 | 1.339814  |
| C | -2.301771 | -0.685392 | 0.073645  |
| C | -3.023497 | -1.282137 | -0.979700 |
| C | -4.371808 | -1.580901 | -0.725267 |
| C | -4.981727 | -1.308957 | 0.507186  |
| H | -4.667697 | -0.502798 | 2.488287  |
| H | -4.959821 | -2.040156 | -1.524888 |
| I | -0.234088 | -0.241541 | -0.266230 |
| C | -0.418236 | 1.894743  | -0.269617 |
| C | 0.491872  | 2.625337  | 0.493135  |
| C | -1.426360 | 2.484363  | -1.030860 |
| C | 0.378215  | 4.021964  | 0.485195  |
| H | 1.271507  | 2.133275  | 1.074604  |
| C | -1.525167 | 3.881748  | -1.014384 |
| H | -2.126380 | 1.889435  | -1.618866 |
| C | -0.626267 | 4.646539  | -0.262085 |
| H | 1.079055  | 4.615714  | 1.075706  |
| H | -2.308446 | 4.366174  | -1.601050 |
| H | -0.709835 | 5.735180  | -0.258031 |
| C | 4.184994  | -0.735937 | 0.933092  |
| S | 3.311473  | -0.835371 | -0.741670 |
| F | 3.285562  | -0.718148 | 1.946972  |
| F | 4.938921  | 0.385755  | 1.022170  |
| F | 4.998265  | -1.804325 | 1.113395  |
| O | 4.420396  | -0.840224 | -1.712095 |
| O | 2.519281  | -2.081061 | -0.644245 |
| O | 2.482377  | 0.408260  | -0.755159 |
| C | -2.073108 | 0.214846  | 2.471081  |

|   |           |           |           |
|---|-----------|-----------|-----------|
| H | -1.188521 | -0.388870 | 2.729678  |
| H | -1.716536 | 1.225226  | 2.214654  |
| H | -2.700484 | 0.298216  | 3.368163  |
| C | -2.430329 | -1.618219 | -2.327494 |
| H | -1.995282 | -0.734912 | -2.820062 |
| H | -1.631573 | -2.372278 | -2.243153 |
| H | -3.204738 | -2.026309 | -2.990367 |
| C | -6.427938 | -1.664379 | 0.749234  |
| H | -6.997671 | -1.689331 | -0.190429 |
| H | -6.508248 | -2.662857 | 1.211232  |
| H | -6.907320 | -0.949094 | 1.433137  |

**syn-Mes(Ph)I(OTf)**

|                                              |                |                    |
|----------------------------------------------|----------------|--------------------|
| Zero-point correction=                       | 0.280119       | (Hartree/Particle) |
| Thermal correction to Energy=                | 0.307033       |                    |
| Thermal correction to Enthalpy=              | 0.307977       |                    |
| Thermal correction to Gibbs Free Energy=     | 0.215248       |                    |
| Sum of electronic and zero-point Energies=   | -1554.224818   |                    |
| Sum of electronic and thermal Energies=      | -1554.197903   |                    |
| Sum of electronic and thermal Enthalpies=    | -1554.196959   |                    |
| Sum of electronic and thermal Free Energies= | -1554.289688   |                    |
| E(RB-P86) =                                  | -1554.50493660 | A.U                |

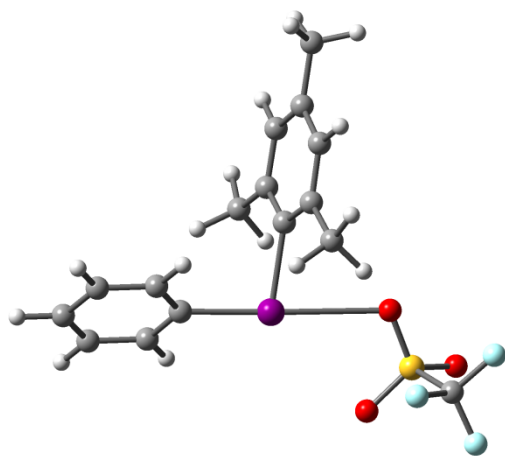

|   |          |           |           |
|---|----------|-----------|-----------|
| C | 4.215562 | -2.186899 | -1.519992 |
| C | 3.027928 | -1.472810 | -1.321657 |
| C | 2.237317 | -1.797168 | -0.217111 |
| C | 2.582098 | -2.809854 | 0.681660  |
| C | 3.767481 | -3.522888 | 0.456387  |
| C | 4.581995 | -3.210010 | -0.636971 |
| H | 4.848929 | -1.942821 | -2.375471 |
| H | 4.052128 | -4.318309 | 1.148278  |
| I | 0.377945 | -0.776588 | 0.104802  |
| C | 1.148269 | 1.219746  | 0.079432  |
| C | 0.842303 | 2.021181  | -1.037524 |
| C | 1.903469 | 1.648616  | 1.184634  |
| C | 1.363178 | 3.323781  | -1.022866 |

|   |           |           |           |
|---|-----------|-----------|-----------|
| C | 2.396070  | 2.963754  | 1.124221  |
| C | 2.141618  | 3.810989  | 0.038483  |
| H | 1.146365  | 3.975303  | -1.874254 |
| H | 2.993789  | 3.329311  | 1.963905  |
| C | -4.239057 | -0.243332 | -0.676994 |
| S | -3.150788 | -0.324626 | 0.868411  |
| F | -3.558053 | -0.656090 | -1.773284 |
| F | -4.669532 | 1.021087  | -0.901851 |
| F | -5.326595 | -1.038787 | -0.535709 |
| O | -4.044676 | 0.142245  | 1.943186  |
| O | -2.737173 | -1.743204 | 0.928484  |
| O | -2.036084 | 0.616370  | 0.539146  |
| C | -0.007389 | 1.564389  | -2.196907 |
| H | 0.425125  | 0.686895  | -2.702389 |
| H | -1.018057 | 1.286297  | -1.860534 |
| H | -0.101123 | 2.368307  | -2.938557 |
| C | 2.201703  | 0.791568  | 2.388111  |
| H | 1.278179  | 0.412564  | 2.853412  |
| H | 2.819701  | -0.080895 | 2.122415  |
| H | 2.748469  | 1.372275  | 3.142333  |
| C | 2.681290  | 5.219785  | 0.007955  |
| H | 3.305045  | 5.383280  | -0.885087 |
| H | 1.860843  | 5.953896  | -0.034535 |
| H | 3.289144  | 5.436633  | 0.896861  |
| H | 2.741524  | -0.684031 | -2.018668 |
| H | 5.507336  | -3.765565 | -0.802576 |
| H | 1.952224  | -3.044208 | 1.541675  |

**p-MeOC<sub>6</sub>H<sub>4</sub>F**

|                                              |                             |
|----------------------------------------------|-----------------------------|
| Zero-point correction=                       | 0.120196 (Hartree/Particle) |
| Thermal correction to Energy=                | 0.128196                    |
| Thermal correction to Enthalpy=              | 0.129140                    |
| Thermal correction to Gibbs Free Energy=     | 0.087529                    |
| Sum of electronic and zero-point Energies=   | -446.024367                 |
| Sum of electronic and thermal Energies=      | -446.016367                 |
| Sum of electronic and thermal Enthalpies=    | -446.015423                 |
| Sum of electronic and thermal Free Energies= | -446.057034                 |
| E(RB-P86) =                                  | -446.144563009 A.U.         |

|   |           |           |           |
|---|-----------|-----------|-----------|
| C | -1.830002 | -0.119944 | -0.000003 |
| C | -1.343837 | 1.186719  | 0.000009  |
| C | -0.986201 | -1.221914 | -0.000084 |
| C | 0.036129  | 1.387638  | -0.000021 |
| H | -2.036105 | 2.030496  | 0.000040  |
| C | 0.401871  | -1.017711 | -0.000130 |
| H | -1.401224 | -2.231376 | -0.000113 |
| C | 0.916354  | 0.289143  | -0.000091 |
| H | 0.448949  | 2.398506  | -0.000025 |
| H | 1.062277  | -1.884448 | -0.000250 |
| F | -3.189436 | -0.320387 | 0.000129  |
| O | 2.254050  | 0.598846  | -0.000119 |



|   |          |           |           |
|---|----------|-----------|-----------|
| C | 3.186092 | -0.495268 | 0.000194  |
| H | 3.067940 | -1.118608 | -0.901063 |
| H | 4.180943 | -0.035270 | 0.000519  |
| H | 3.067297 | -1.118555 | 0.901424  |

**p-MeOC<sub>6</sub>H<sub>4</sub>I**

|                                              |                             |
|----------------------------------------------|-----------------------------|
| Zero-point correction=                       | 0.118300 (Hartree/Particle) |
| Thermal correction to Energy=                | 0.127023                    |
| Thermal correction to Enthalpy=              | 0.127968                    |
| Thermal correction to Gibbs Free Energy=     | 0.082862                    |
| Sum of electronic and zero-point Energies=   | -357.576932                 |
| Sum of electronic and thermal Energies=      | -357.568208                 |
| Sum of electronic and thermal Enthalpies=    | -357.567264                 |
| Sum of electronic and thermal Free Energies= | -357.612369                 |
| E(RB-P86) =                                  | -357.695231496 A.U.         |

|   |           |           |           |
|---|-----------|-----------|-----------|
| C | -0.205176 | 0.082013  | -0.000011 |
| C | 0.400324  | 1.347186  | 0.000028  |
| C | 0.575492  | -1.075020 | -0.000020 |
| C | 1.791182  | 1.443912  | 0.000060  |
| H | -0.203256 | 2.256670  | 0.000035  |
| C | 1.973991  | -0.979534 | 0.000011  |
| H | 0.109899  | -2.061666 | -0.000053 |
| C | 2.587727  | 0.283450  | 0.000052  |
| H | 2.277440  | 2.421961  | 0.000092  |
| H | 2.563813  | -1.896164 | -0.000003 |
| O | 3.941531  | 0.487653  | 0.000076  |
| C | 4.787117  | -0.676900 | 0.000176  |
| H | 4.619304  | -1.287802 | -0.901206 |
| H | 5.814203  | -0.294882 | 0.000268  |
| H | 4.619128  | -1.287773 | 0.901543  |
| I | -2.316919 | -0.081174 | -0.000058 |

**p-NO<sub>2</sub>C<sub>6</sub>H<sub>4</sub>F**

|                                              |                             |
|----------------------------------------------|-----------------------------|
| Zero-point correction=                       | 0.091056 (Hartree/Particle) |
| Thermal correction to Energy=                | 0.098959                    |
| Thermal correction to Enthalpy=              | 0.099903                    |
| Thermal correction to Gibbs Free Energy=     | 0.057512                    |
| Sum of electronic and zero-point Energies=   | -536.092506                 |
| Sum of electronic and thermal Energies=      | -536.084602                 |
| Sum of electronic and thermal Enthalpies=    | -536.083658                 |
| Sum of electronic and thermal Free Energies= | -536.126049                 |
| E(RB-P86) =                                  | -536.183561626 A.U.         |

|   |          |           |           |
|---|----------|-----------|-----------|
| C | 2.060948 | 0.000003  | -0.000038 |
| C | 1.395902 | -1.227083 | -0.000051 |
| C | 1.395873 | 1.227073  | 0.000045  |
| C | 0.003161 | -1.225041 | -0.000108 |
| H | 1.963394 | -2.158245 | -0.000132 |
| C | 0.003132 | 1.225029  | 0.000154  |
| H | 1.963375 | 2.158231  | 0.000126  |

|   |           |           |           |
|---|-----------|-----------|-----------|
| C | -0.674696 | -0.000011 | 0.000024  |
| H | -0.559734 | -2.157705 | -0.000166 |
| H | -0.559768 | 2.157688  | 0.000220  |
| F | 3.417227  | 0.000028  | -0.000002 |
| N | -2.142980 | -0.000060 | 0.000042  |
| O | -2.729220 | 1.096752  | -0.000259 |
| O | -2.729201 | -1.096705 | 0.000199  |

**p-NO<sub>2</sub>C<sub>6</sub>H<sub>4</sub>I**

|                                              |                             |
|----------------------------------------------|-----------------------------|
| Zero-point correction=                       | 0.088775 (Hartree/Particle) |
| Thermal correction to Energy=                | 0.097469                    |
| Thermal correction to Enthalpy=              | 0.098413                    |
| Thermal correction to Gibbs Free Energy=     | 0.052354                    |
| Sum of electronic and zero-point Energies=   | -447.642914                 |
| Sum of electronic and thermal Energies=      | -447.634219                 |
| Sum of electronic and thermal Enthalpies=    | -447.633275                 |
| Sum of electronic and thermal Free Energies= | -447.679335                 |
| E(RB-P86) =                                  | -447.731688450 A.U.         |

|   |           |           |           |
|---|-----------|-----------|-----------|
| C | 0.436148  | -0.000001 | 0.000007  |
| C | -0.253077 | -1.222237 | -0.000069 |
| C | -0.253077 | 1.222235  | 0.000079  |
| C | -1.647253 | -1.222646 | -0.000072 |
| H | 0.288370  | -2.168744 | -0.000130 |
| C | -1.647253 | 1.222647  | 0.000067  |
| H | 0.288370  | 2.168743  | 0.000142  |
| C | -2.326157 | 0.000001  | -0.000009 |
| H | -2.207351 | -2.157362 | -0.000129 |
| H | -2.207351 | 2.157362  | 0.000119  |
| N | -3.796022 | -0.000004 | -0.000014 |
| O | -4.381380 | 1.097085  | -0.000061 |
| O | -4.381380 | -1.097082 | 0.000072  |
| I | 2.540683  | 0.000000  | 0.000000  |

**PhF**

|                                              |                             |
|----------------------------------------------|-----------------------------|
| Zero-point correction=                       | 0.089091 (Hartree/Particle) |
| Thermal correction to Energy=                | 0.094425                    |
| Thermal correction to Enthalpy=              | 0.095369                    |
| Thermal correction to Gibbs Free Energy=     | 0.060144                    |
| Sum of electronic and zero-point Energies=   | -331.493963                 |
| Sum of electronic and thermal Energies=      | -331.488629                 |
| Sum of electronic and thermal Enthalpies=    | -331.487685                 |
| Sum of electronic and thermal Free Energies= | -331.522910                 |
| E(RB-P86) =                                  | -331.583054196              |

|   |           |           |           |
|---|-----------|-----------|-----------|
| C | 0.926059  | 0.000001  | 0.000018  |
| C | 0.260861  | 1.222812  | 0.000004  |
| C | 0.260861  | -1.222812 | 0.000001  |
| C | -1.139787 | 1.212557  | -0.000001 |
| H | 0.828515  | 2.154997  | -0.000003 |
| C | -1.139786 | -1.212557 | -0.000003 |

|   |           |           |           |
|---|-----------|-----------|-----------|
| H | 0.828518  | -2.154995 | -0.000007 |
| C | -1.840875 | 0.000000  | 0.000010  |
| H | -1.681721 | 2.160880  | -0.000003 |
| H | -1.681721 | -2.160880 | -0.000008 |
| H | -2.932737 | -0.000001 | 0.000012  |
| F | 2.297238  | 0.000000  | -0.000018 |

### Phi

|                                              |                             |
|----------------------------------------------|-----------------------------|
| Zero-point correction=                       | 0.087011 (Hartree/Particle) |
| Thermal correction to Energy=                | 0.093070                    |
| Thermal correction to Enthalpy=              | 0.094015                    |
| Thermal correction to Gibbs Free Energy=     | 0.055129                    |
| Sum of electronic and zero-point Energies=   | -243.044927                 |
| Sum of electronic and thermal Energies=      | -243.038868                 |
| Sum of electronic and thermal Enthalpies=    | -243.037924                 |
| Sum of electronic and thermal Free Energies= | -243.076810                 |
| E(RB-P86) =                                  | -243.131938219              |

|   |           |           |           |
|---|-----------|-----------|-----------|
| C | -2.650496 | -1.210673 | 0.000003  |
| C | -1.249408 | -1.219590 | 0.000001  |
| C | -0.562925 | 0.000000  | 0.000001  |
| C | -1.249408 | 1.219590  | 0.000002  |
| C | -2.650496 | 1.210673  | 0.000003  |
| C | -3.352634 | 0.000000  | 0.000004  |
| H | -3.189971 | -2.160779 | 0.000003  |
| H | -0.706401 | -2.166121 | 0.000001  |
| H | -0.706401 | 2.166121  | 0.000001  |
| H | -3.189971 | 2.160779  | 0.000004  |
| H | -4.444737 | 0.000000  | 0.000005  |
| I | 1.557164  | 0.000000  | -0.000002 |

### Triflate

|                                              |                             |
|----------------------------------------------|-----------------------------|
| Zero-point correction=                       | 0.025069 (Hartree/Particle) |
| Thermal correction to Energy=                | 0.032555                    |
| Thermal correction to Enthalpy=              | 0.033499                    |
| Thermal correction to Gibbs Free Energy=     | -0.007757                   |
| Sum of electronic and zero-point Energies=   | -961.884545                 |
| Sum of electronic and thermal Energies=      | -961.877059                 |
| Sum of electronic and thermal Enthalpies=    | -961.876115                 |
| Sum of electronic and thermal Free Energies= | -961.917371                 |
| E(RB-P86) =                                  | -961.909614744              |

|   |           |           |           |
|---|-----------|-----------|-----------|
| C | -0.963869 | 0.000049  | -0.000001 |
| S | 0.928228  | -0.000025 | -0.000004 |
| F | -1.455632 | -0.643848 | 1.089799  |
| F | -1.455569 | -0.621948 | -1.102516 |
| F | -1.455539 | 1.265870  | 0.012661  |
| O | 1.259763  | 0.734515  | -1.242160 |
| O | 1.259684  | 0.708522  | 1.257177  |
| O | 1.259583  | -1.443107 | -0.014946 |

## V. $^1\text{H}$ , $^{13}\text{C}$ , and $^{19}\text{F}$ NMR Spectra of Diaryliodonium Salts

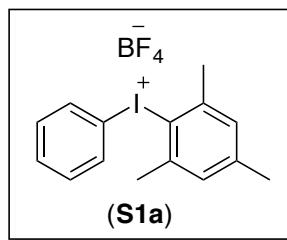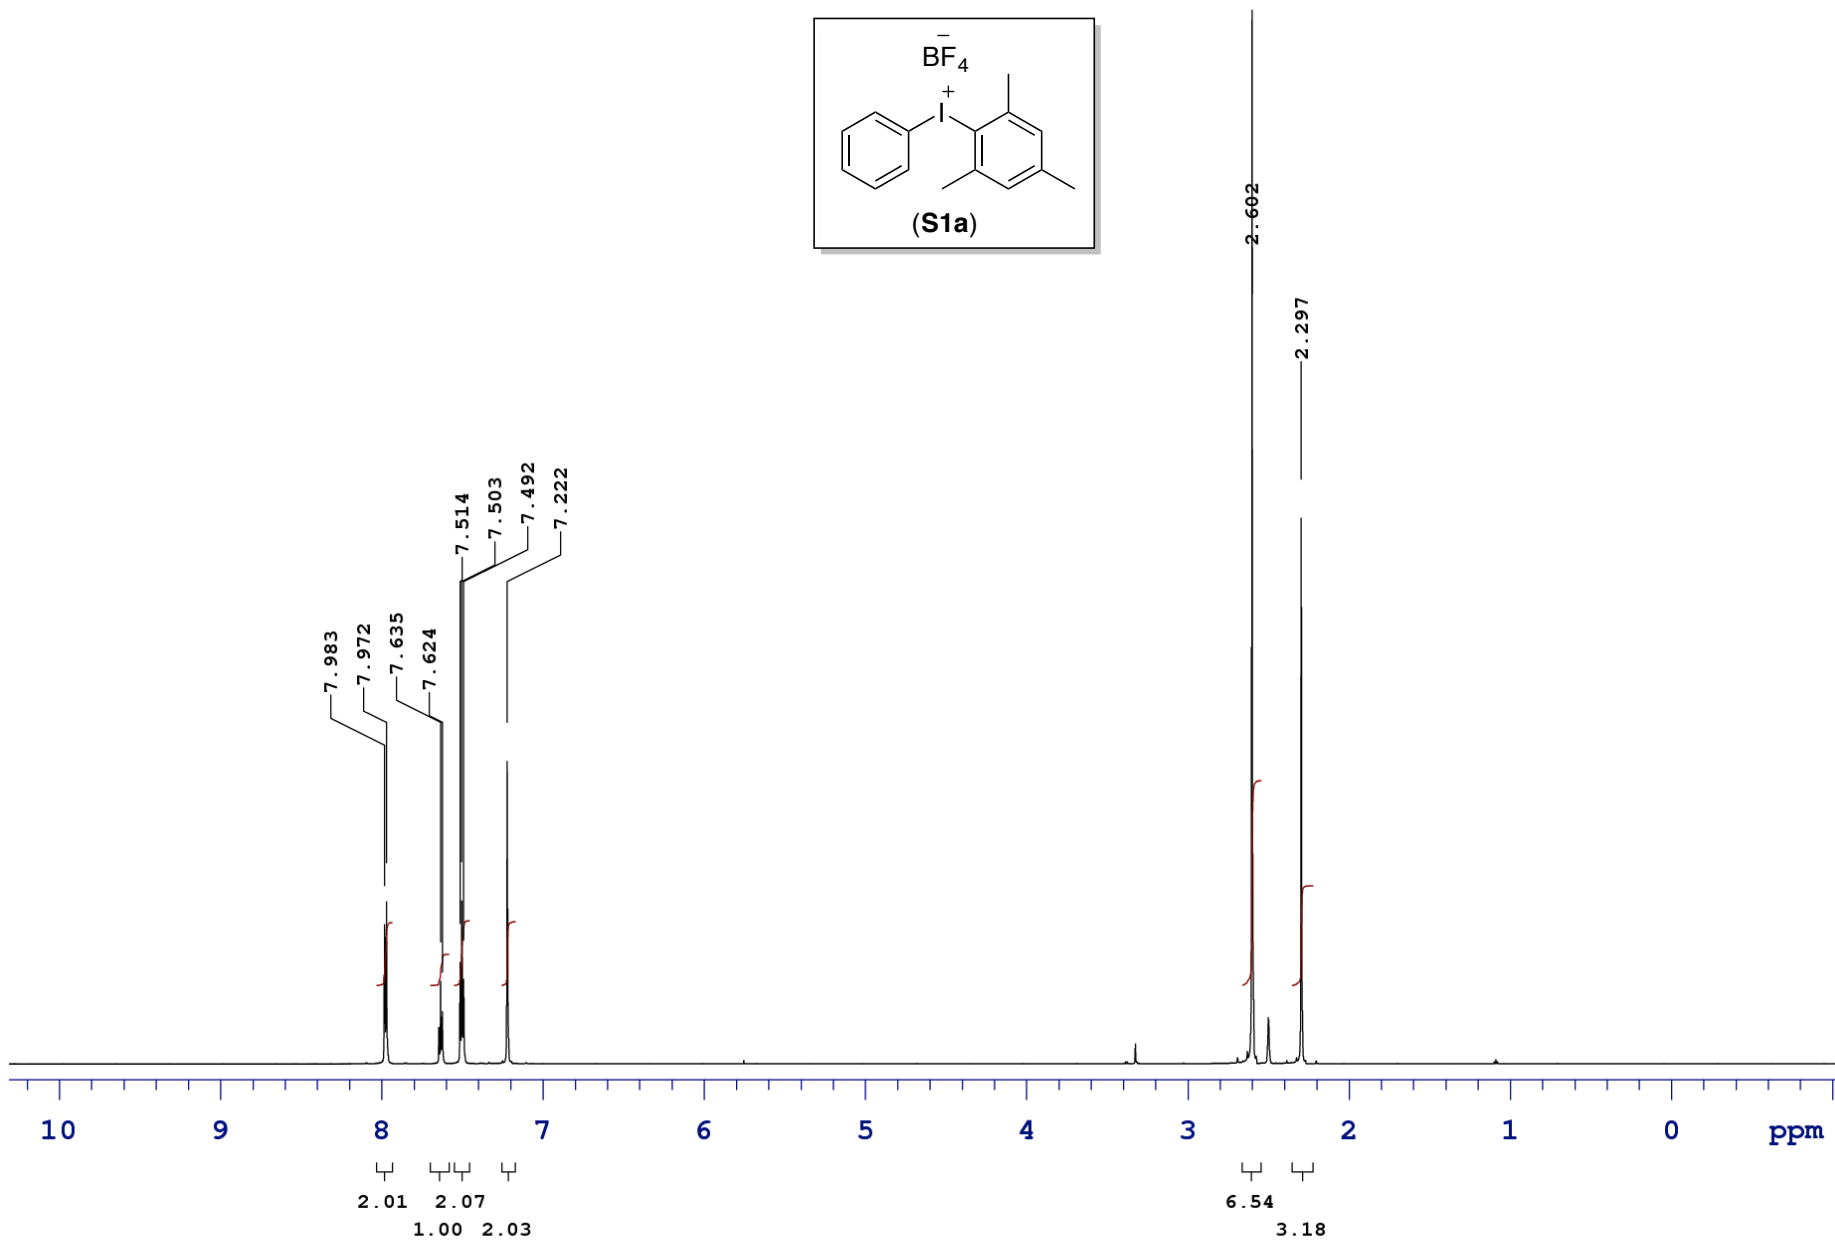

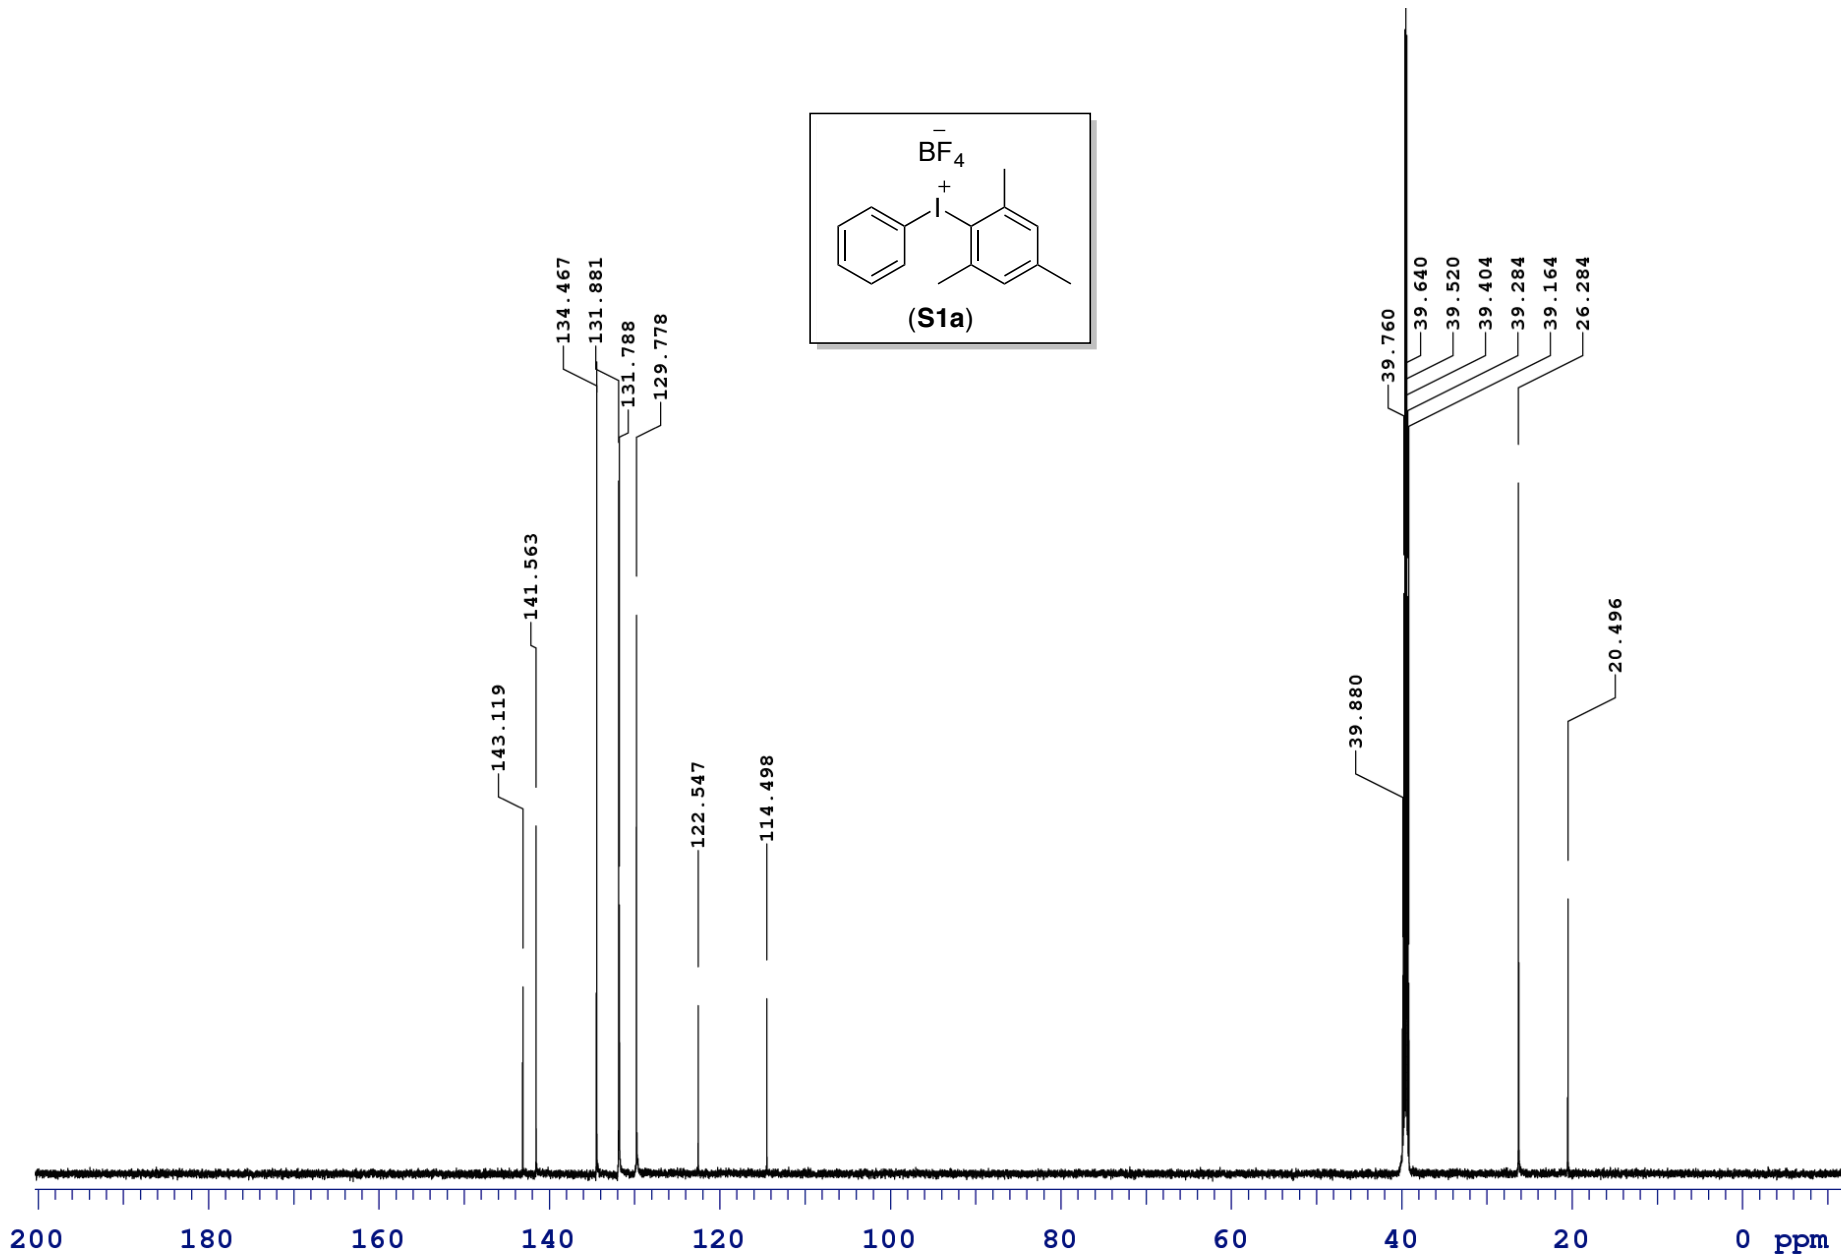

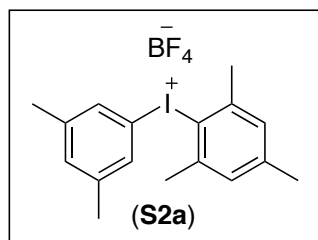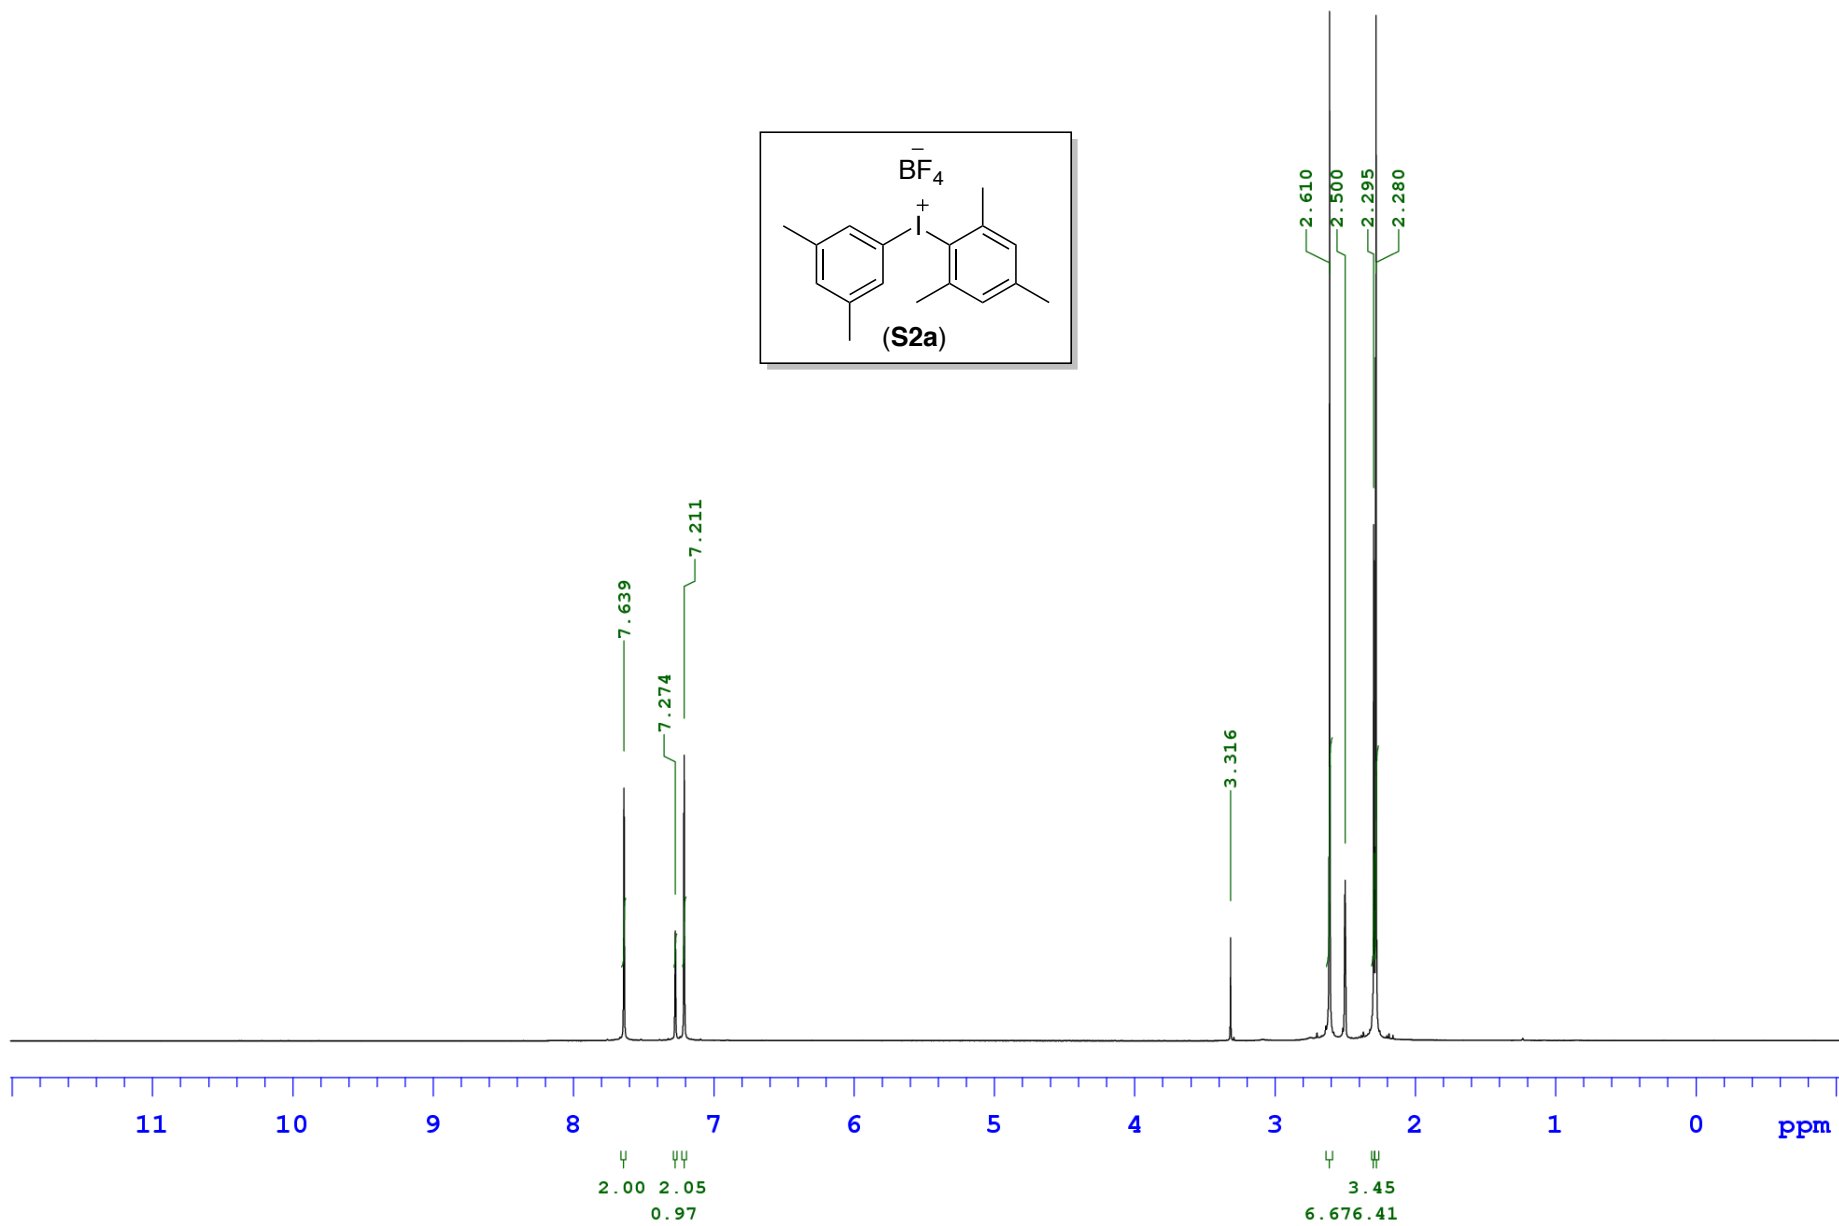

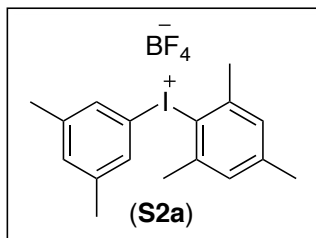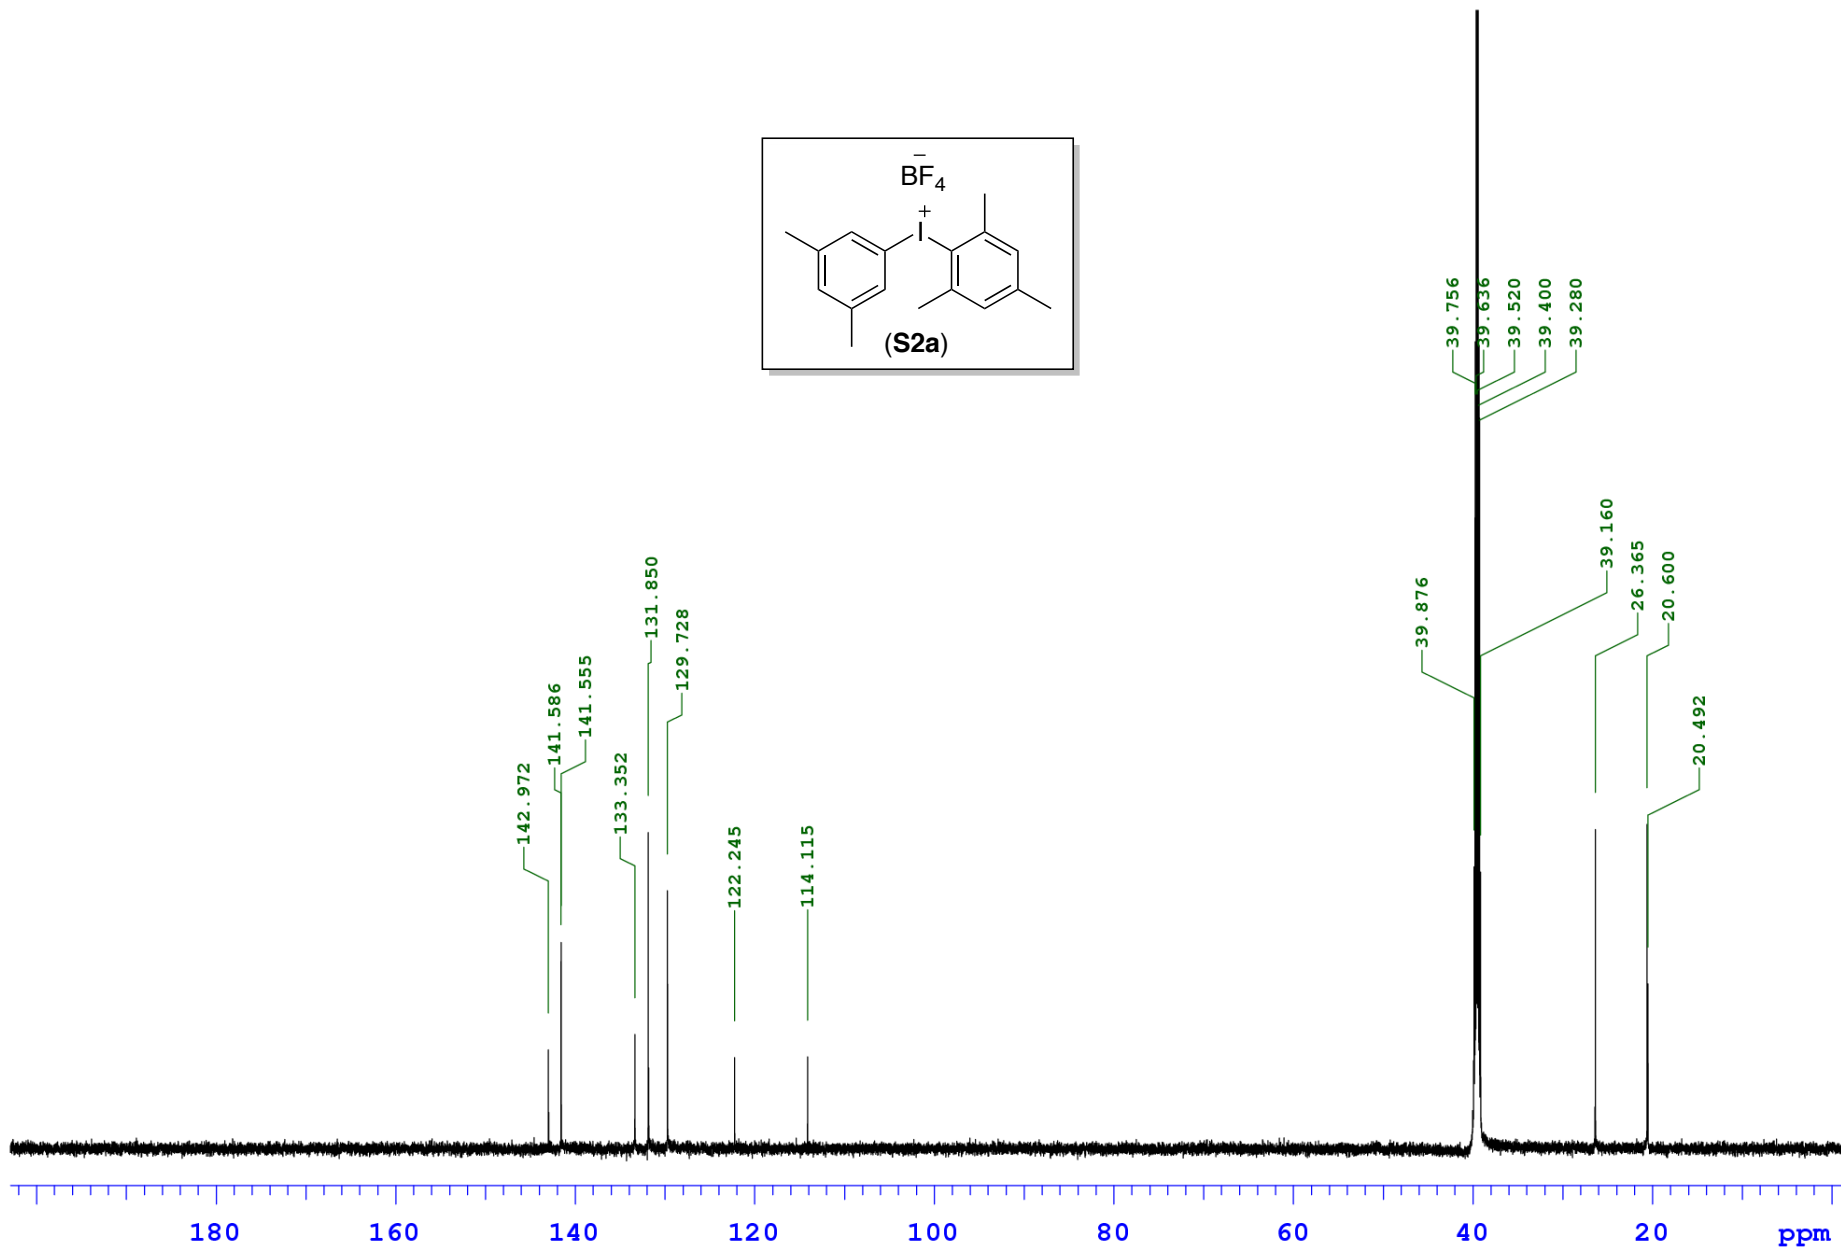



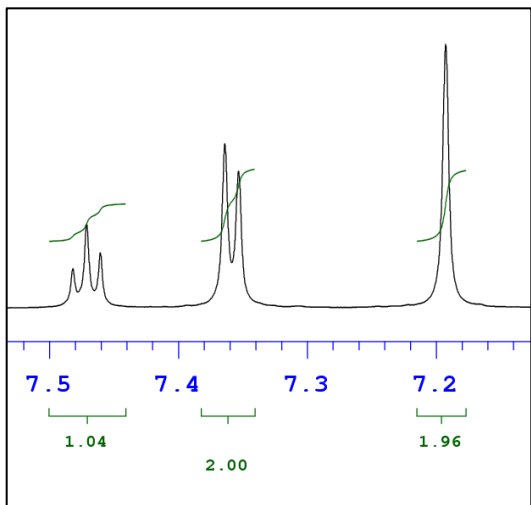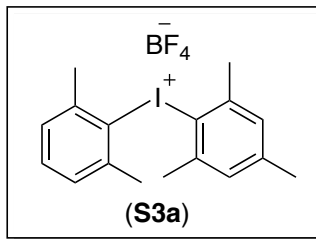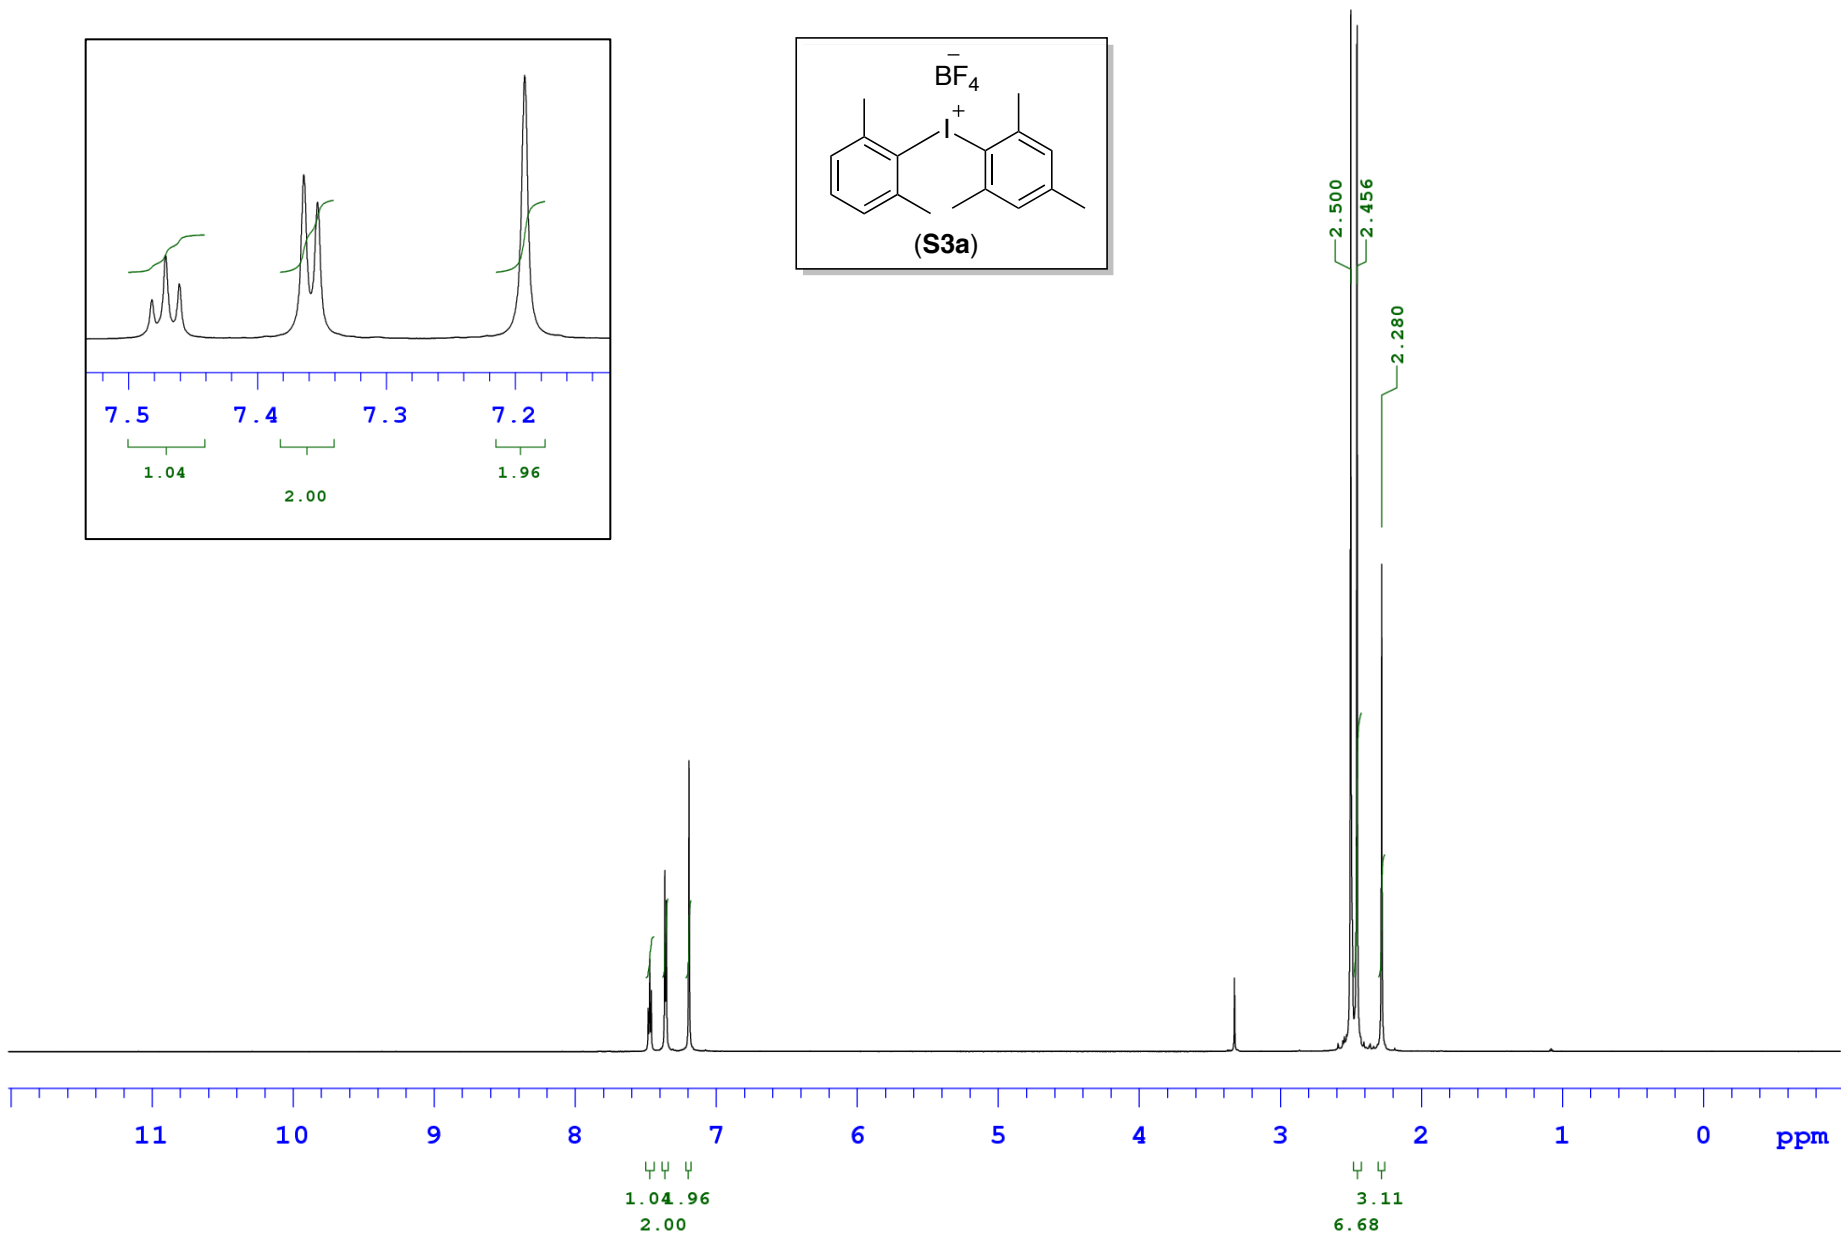

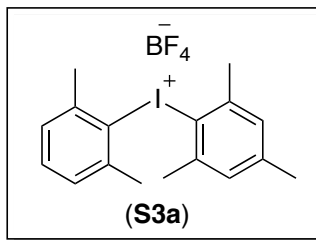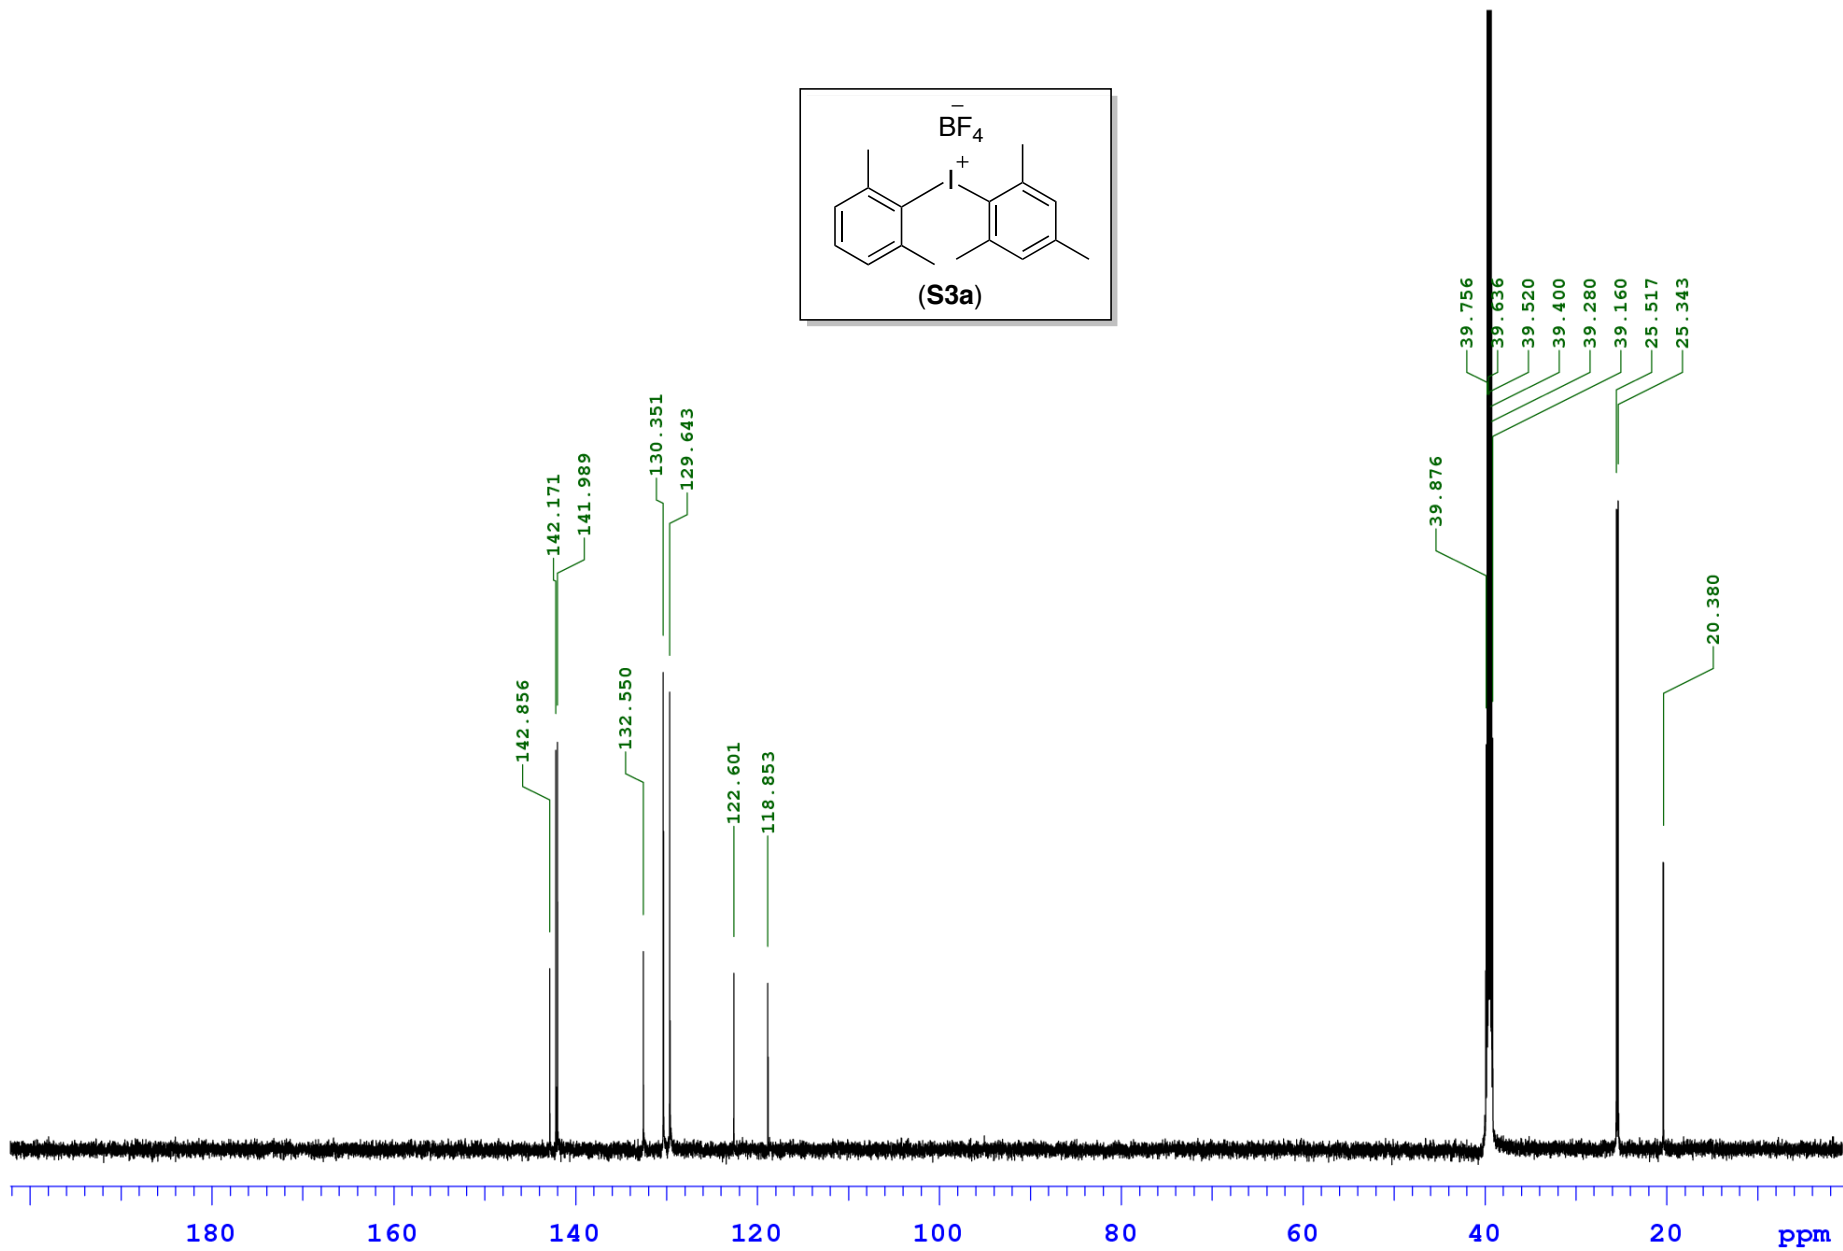

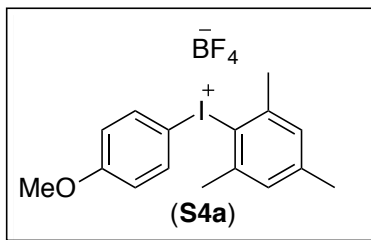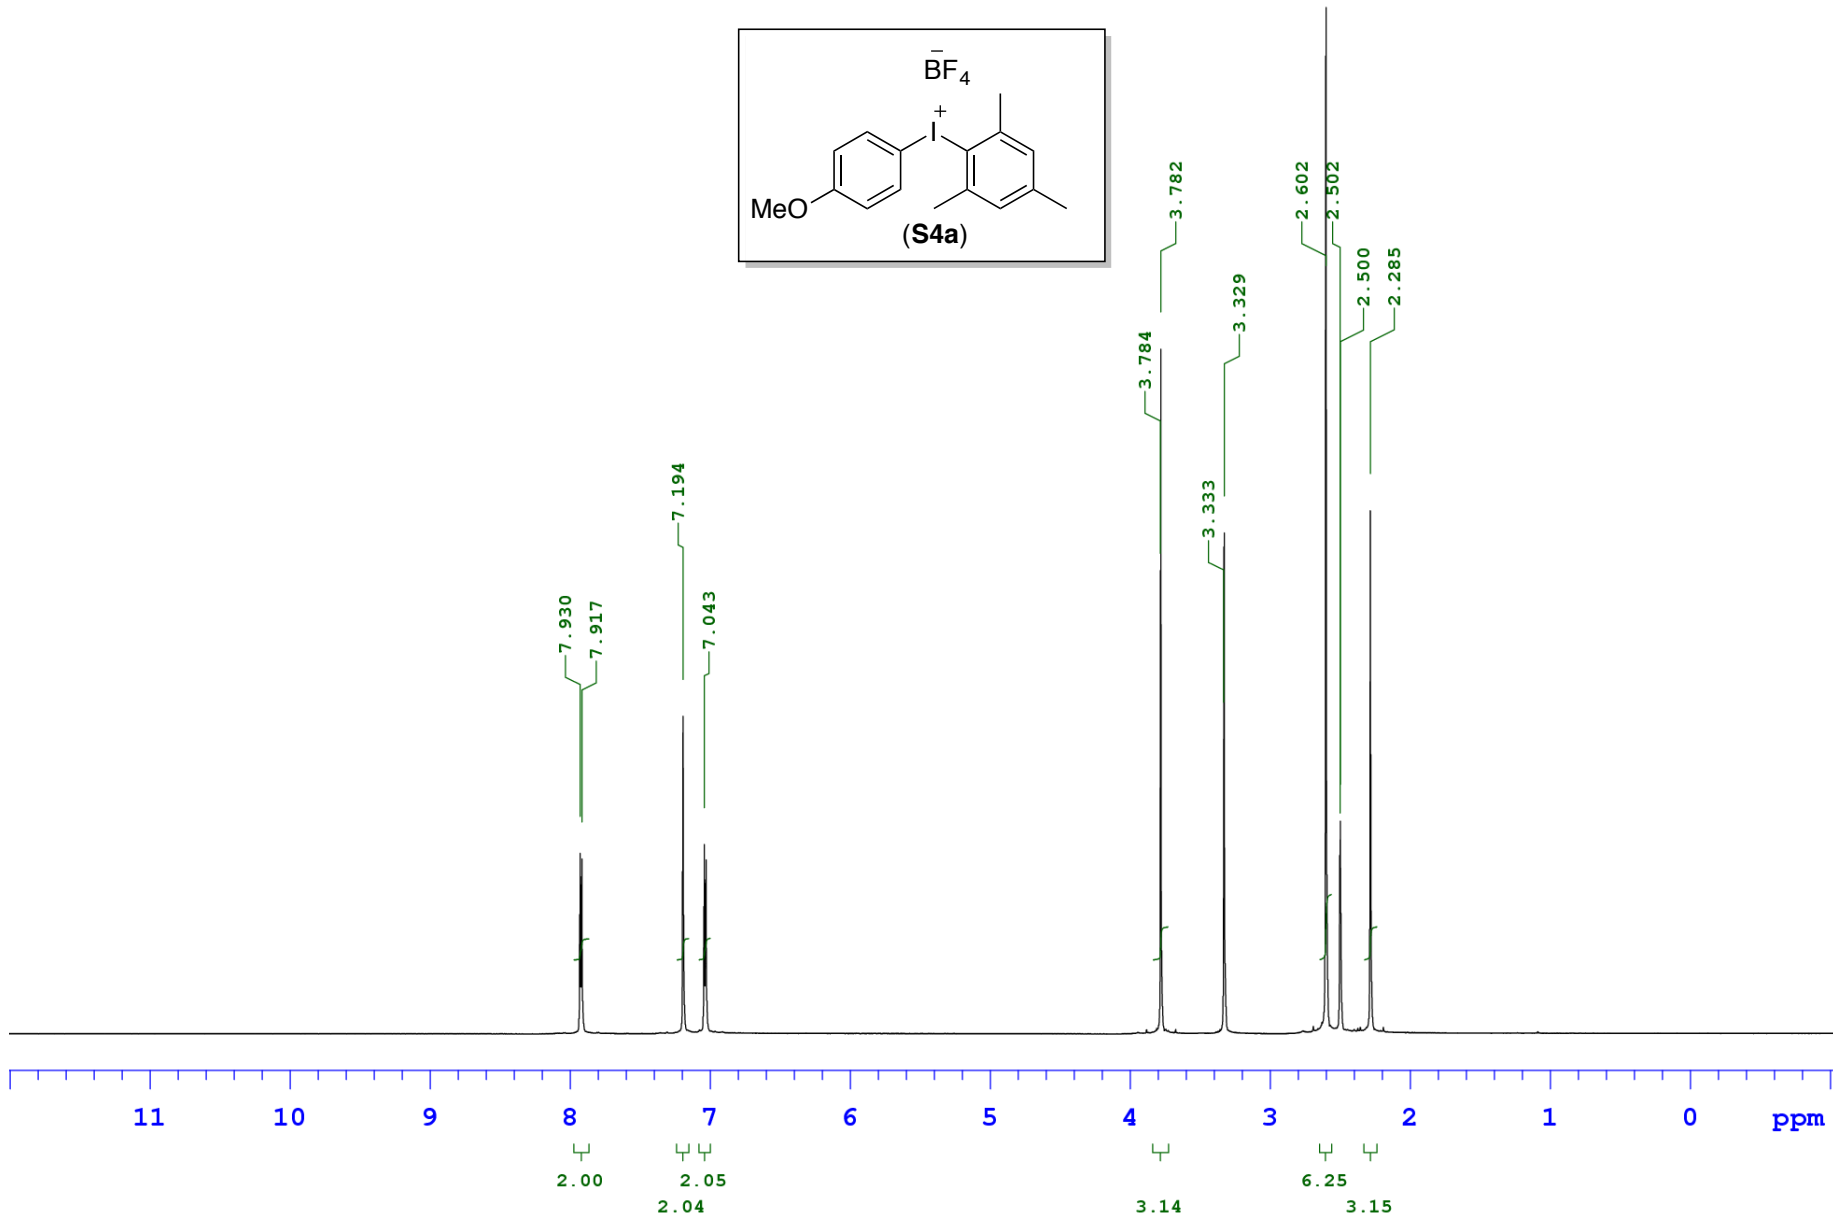

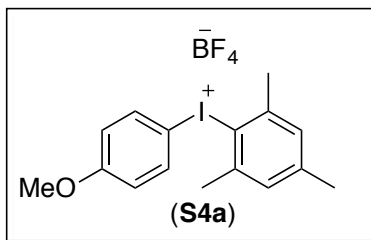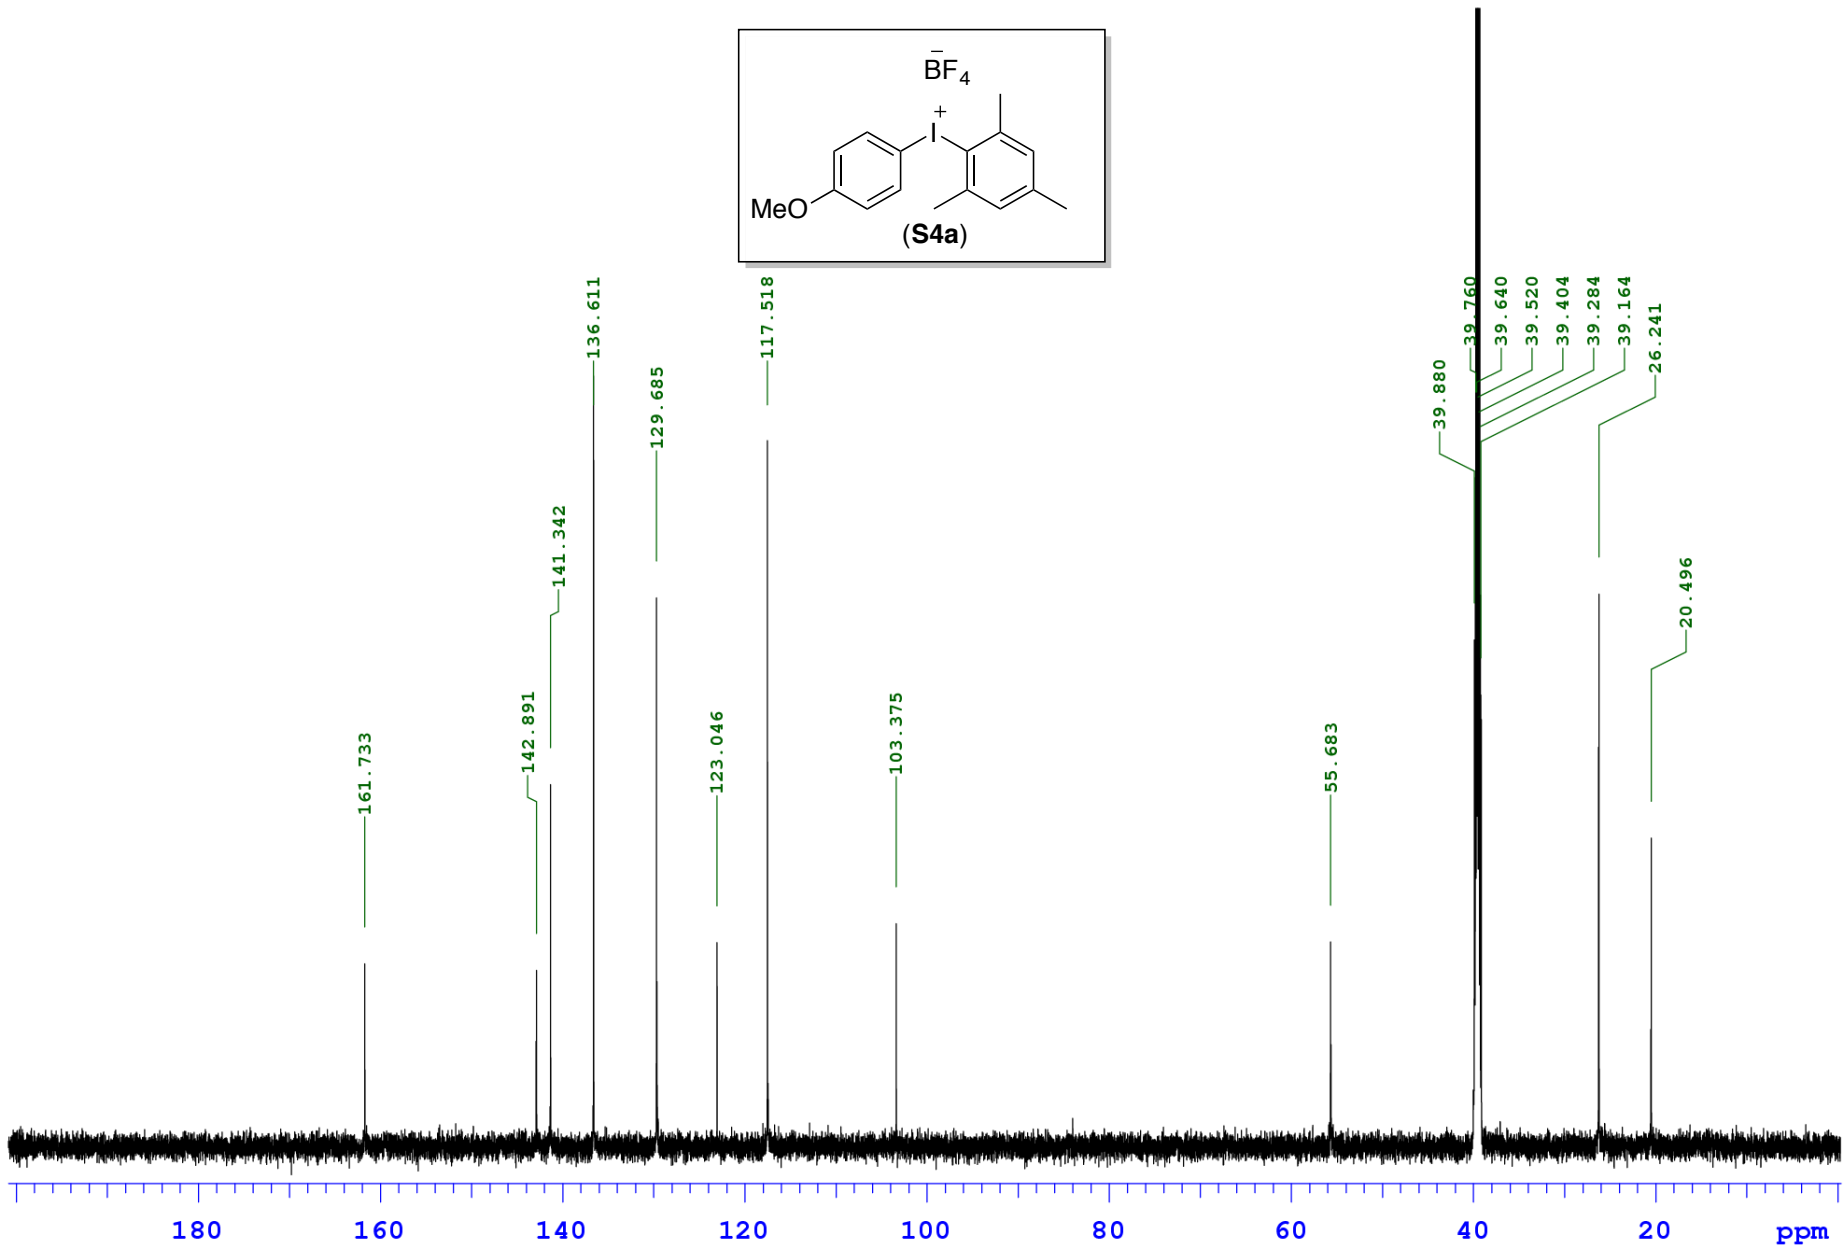

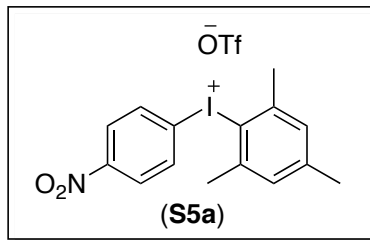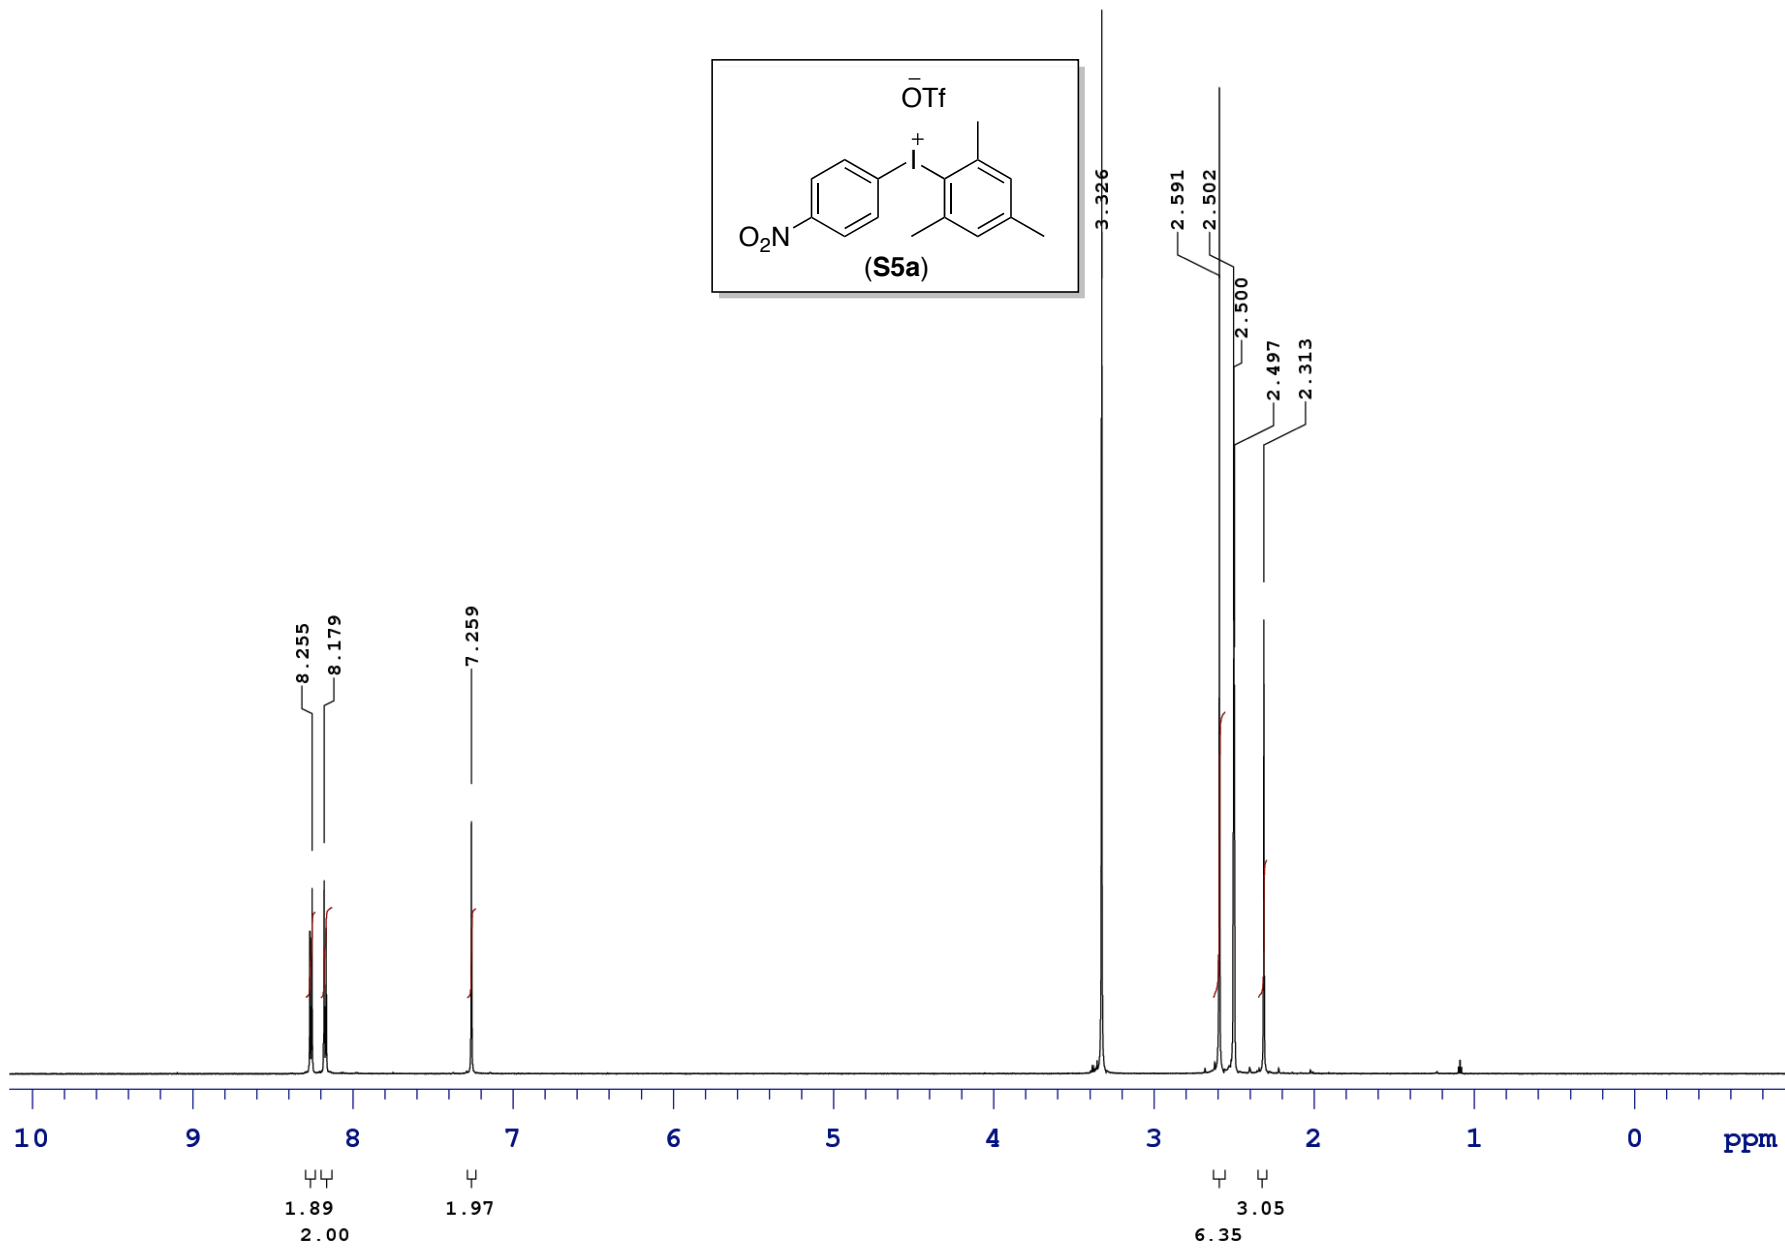

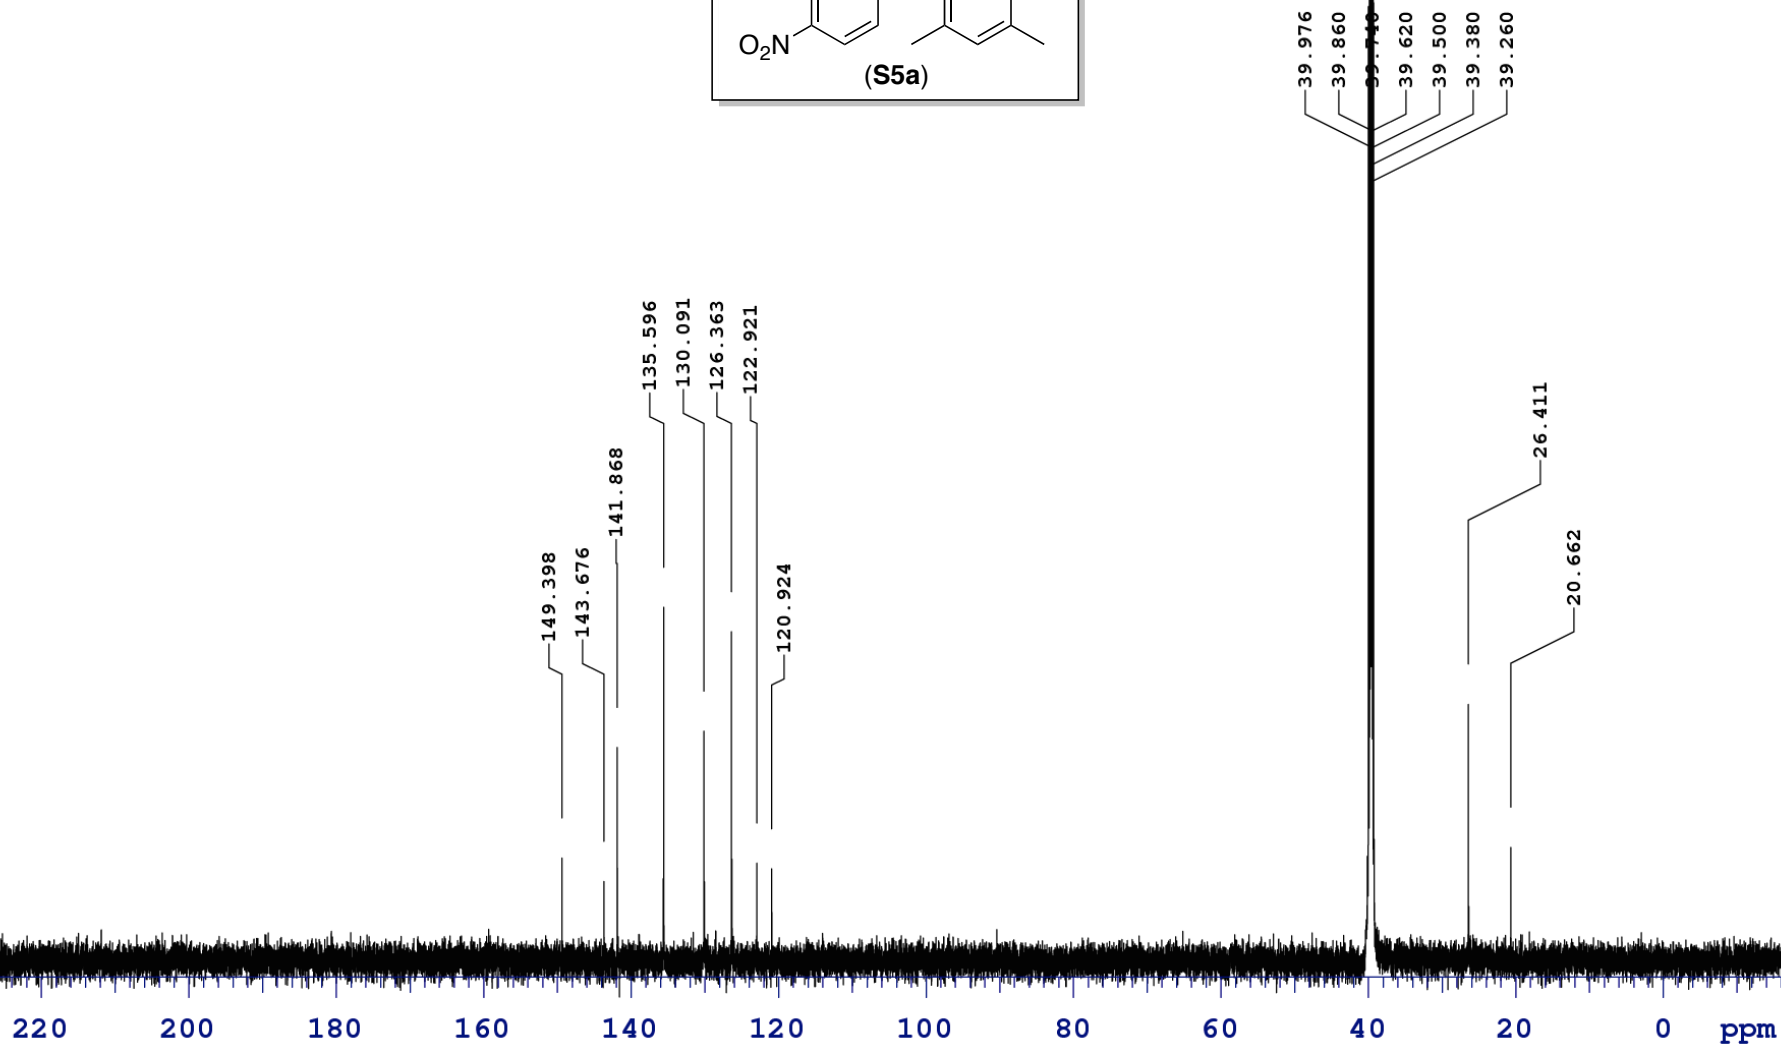

Supplement: om5007903_si_001.pdf [file om5007903_si_001.pdf]
